# Supplementary material for: Synergistic formal ring contraction for the enantioselective synthesis of spiropyrazolones
Source: Royal Society of Chemistry journal article supplement (doi:10.1039/c8sc00913a), 2018-01-01
Supplement: c8sc00913a1.pdf [file c8sc00913a1.pdf]

## Synergistic formal ring contraction for the enantioselective synthesis of spiropyrazolones

Marta Meazza, Martin Kamlar, Lucie Jašíková, Bedřich Formánek, Andrea Mazzanti, Jana Roithová,\*  
Jan Veselý,\* Ramon Rios \*

### Supporting information

#### Table of Contents

|                                                                                        |     |
|----------------------------------------------------------------------------------------|-----|
| 1. General information.....                                                            | 2   |
| 2. Reaction Optimization.....                                                          | 3   |
| 3. Synthesis of starting materials .....                                               | 4   |
| 3.1. General procedure for the synthesis of pyrazolones <b>1</b> .....                 | 4   |
| 3.2. General procedure for the synthesis of 7 membered ring derivatives <b>1</b> ..... | 4   |
| 3.3. Characterization data for new compounds.....                                      | 4   |
| 4. Synthesis of the final spiro compounds .....                                        | 6   |
| 4.1. General procedure for the ring contraction for products <b>3</b> .....            | 6   |
| 4.2. Modified procedure for products <b>3o-p</b> , <b>3r</b> , <b>3t-w</b> .....       | 6   |
| 4.3. Characterization of compounds <b>3</b> .....                                      | 6   |
| 5. Derivatizations.....                                                                | 16  |
| 5.1. Synthesis of <b>11</b> .....                                                      | 16  |
| 5.2. Synthesis of <b>12</b> .....                                                      | 16  |
| 5.3. Synthesis of <b>13</b> .....                                                      | 17  |
| 5.4. Synthesis of <b>14</b> .....                                                      | 18  |
| 5.5. Synthesis of <b>16</b> .....                                                      | 19  |
| 5.6. Synthesis of <b>17</b> .....                                                      | 20  |
| 5.7. Synthesis of <b>19</b> and <b>20</b> .....                                        | 21  |
| 7. NMR spectra starting material .....                                                 | 41  |
| 8. NMR spectra spiro compounds .....                                                   | 47  |
| 9. HPLC traces.....                                                                    | 84  |
| 9. Mass spectrometry experiments.....                                                  | 114 |
| 10. Infrared photodissociation (IRPD) spectroscopy and theoretical calculations .....  | 116 |

## 1. General information

Chemicals and solvents were either purchased (puriss p.A.) from commercial suppliers or purified by standard techniques. For thin-layer chromatography (TLC), silica gel plates Merck 60 F254 were used, and compounds were visualized by irradiation with UV light and/or by treatment with a solution of phosphomolybdenic acid (25 g),  $\text{Ce}(\text{SO}_4)_2 \cdot \text{H}_2\text{O}$  (10 g), conc.  $\text{H}_2\text{SO}_4$  (60 mL), and  $\text{H}_2\text{O}$  (940 mL) followed by heating. Thin layer chromatography (TLC) was performed on Merck TLC Silicagel 60 F254. The products' spots were visualized by UV-light at 254 nm. Column chromatography was performed using silica gel (Geduran Si60, 40-63  $\mu\text{m}$ ).  $^1\text{H}$ -NMR,  $^{13}\text{C}$ -NMR,  $^{19}\text{F}$ -NMR, 2D-NMR were recorded with a Bruker DPX400 NMR or with a FT-NMR spectrometer Bruker AVANCE III 600 MHz. Chemical shifts ( $\delta$ ) are reported in ppm relative to residual solvent signals ( $\text{CHCl}_3$ , 7.26 ppm for  $^1\text{H}$  NMR;  $\text{CDCl}_3$ , 77.00 ppm for  $^{13}\text{C}$  NMR).  $^{19}\text{F}$  NMR spectra were acquired in proton-decoupled mode. HRMS were recorded using a MaXis (Bruker Daltonics, Bremen, Germany) mass spectrometer equipped with a Time of Flight (TOF) analyzer. Optical rotations were performed on an Optical Activity PolAAR 2001 machine. The HPLC analysis were performed on a Perkin Elmer Flexar HPLC and on an Agilent 1220 Infinity LC system HPLC or on a LC20AD Shimadzu liquid chromatograph with SPD-M20A diode array detector with columns Daicel Chiralpak.

## 2. Reaction Optimization

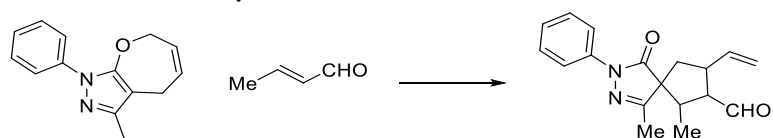

| Entry | Solvent                         | T    | Conversion<br>24 h <sup>[c]</sup> | d.r.       | ee major |
|-------|---------------------------------|------|-----------------------------------|------------|----------|
| 1     | Toluene                         | r.t. | 31%                               | 8.2:0.6:1  | 97%      |
| 2     | CH <sub>3</sub> CN              | r.t. | 61%                               | 22.5:1.7:1 | 88%      |
| 3     | CH <sub>2</sub> Cl <sub>2</sub> | r.t. | 62%                               | 11.9:0.9:1 | 90%      |
| 4     | DMSO                            | r.t. | traces                            | ---        | ---      |
| 5     | THF                             | r.t. | 38%                               | 4.8:0.9:1  | 96%      |
| 6     | EtOAc                           | r.t. | 91%                               | 8:1.3:1    | 96%      |
| 7     | DMF                             | r.t. | 27%                               | 4.4:1      | 38%      |
| 8     | CHCl <sub>3</sub>               | r.t. | 85%                               | 3.3:0.4:1  | 94%      |

**Table S1:** Screening of the solvents

### 3. Synthesis of starting materials

#### 3.1. General procedure for the synthesis of pyrazolones **1**

Pyrazolone 2-methyl-5-phenyl-2,4-dihydro-3H-pyrazol-3-one was purchased from commercial source. Pyrazolone 2,5-diphenyl-2,4-dihydro-3H-pyrazol-3-one was prepared according published procedure.<sup>1</sup> Spectroscopic data correspond with data published in literature.<sup>2</sup> Pyrazolone 2-(*tert*-butyl)-5-phenyl-2,4-dihydro-3H-pyrazol-3-one was prepared and characterized according published procedure.<sup>1</sup> Pyrazolone 5-phenyl-2-(*p*-tolyl)-2,4-dihydro-3H-pyrazol-3-one was prepared according published procedure<sup>1</sup> and characterized according published data.<sup>3</sup> Pyrazolone 2-(2,4-dinitrophenyl)-5-phenyl-2,4-dihydro-3H-pyrazol-3-one was prepared and characterized according to published procedure.<sup>4</sup> Pyrazolone 2-ethyl-5-phenyl-2,4-dihydro-3H-pyrazol-3-one was prepared<sup>1</sup> and characterized according to published procedure.<sup>4</sup>

#### 3.2. General procedure for the synthesis of 7 membered ring derivatives **1**

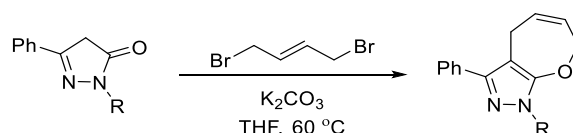

**Scheme S1:** Synthesis of the starting materials

A mixture of 1,3-indanedione (1 eq), 1,4-dibromobut-2-ene (1 eq), and  $K_2CO_3$  (2.5 eq) in THF was stirred at 60 °C under nitrogen overnight. After completion of the reaction (monitored by  $^1H$ -NMR), the mixture was cooled to room temperature and filtered with  $CHCl_3$  over celite. The organic phase was washed with water and brine. The organic layers were separated, dried with  $MgSO_4$  and concentrated by *vacuum*. The crude product was purified by column chromatography over silica gel (eluent: hexane/EtOAc) to afford the product.

#### 3.3. Characterization data for new compounds

##### 1-methyl-3-phenyl-4,7-dihydro-1H-oxepino[2,3-c]pyrazole, **1a**

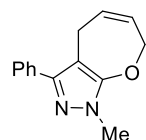

Brown oil, yield 50%.  $^1H$  NMR (400 MHz,  $CDCl_3$ )  $\delta$  7.68 – 7.60 (m, 2H), 7.42 – 7.35 (m,  $J$  = 8.3, 7.6 Hz, 2H), 7.24 – 7.18 (m, 1H), 6.20 (dt,  $J$  = 10.7, 5.3 Hz, 1H), 6.02 – 5.92 (m, 1H), 4.66 (dd,  $J$  = 6.3, 0.6 Hz, 2H), 3.39 – 3.24 (m, 2H), 2.19 (s, 3H).  $^{13}C$  NMR (101 MHz,  $CDCl_3$ )  $\delta$  152.2, 147.2, 138.7, 134.2, 128.7 (2C), 125.8, 125.7, 121.9 (2C), 97.8, 67.3, 23.1, 12.6. HRMS (ESI)  $m/z$  calcd for  $C_{14}H_{15}N_2O$   $[M+H]^+$  = 227.1179; found = 227.1178.

<sup>1</sup> R. Ramajayam, K.-P. Tan, H.-G. Liu, P.-H. Liang, *Bioorg. Med. Chem.* **2010**, *18*, 7849–7854

<sup>2</sup> H. Clavier, L. Giordano, A. Tenaglia, *Angew. Chem. Int. Ed.* **2012**, *51*, 8648–8651.

<sup>3</sup> D. Castagnolo, A. De Logu, M. Radi, B. Bechi, F. Manetti, M. Magnani, S. Supino, R. Meleddu, L. Chisu, M. Botta, *Bioorg. Med. Chem.* **2008**, *16*, 8587–8591.

<sup>4</sup> D. N. Kuznetsov, A. G. Ruchkina, K. I. Kobrakov, *Chem. Heterocycl. Compd.* **2011**, *47*, 441–447.



### 1-ethyl-3-phenyl-4,7-dihydro-1H-oxepino[2,3-c]pyrazole, 1b

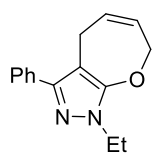

Orange oil, yield 49%. <sup>1</sup>H NMR (400 MHz, CDCl<sub>3</sub>) δ 7.69 – 7.64 (m, 2H), 7.42 – 7.37 (m, 2H), 7.25 – 7.19 (m, 1H), 6.29 – 6.14 (m, 1H), 6.06 – 5.91 (m, 1H), 4.68 (dd, *J* = 6.3, 0.7 Hz, 2H), 3.44 – 3.28 (m, 2H), 2.58 (q, *J* = 7.6 Hz, 2H), 1.27 (t, *J* = 7.6 Hz, 3H). <sup>13</sup>C NMR (101 MHz, CDCl<sub>3</sub>) δ 152.4, 134.2, 128.7, 126.3, 125.8, 122.1, 118.6, 97.0, 67.2, 22.9, 20.7, 13.2. HRMS (ESI) *m/z* calcd for C<sub>15</sub>H<sub>17</sub>N<sub>2</sub>O [M+H]<sup>+</sup> = 241.1335; found = 241.1337.

### 1,3-diphenyl-4,7-dihydro-1H-oxepino[2,3-c]pyrazole, 1c

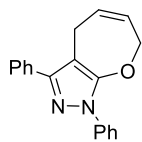

Yellowish oil, yield 40%; <sup>1</sup>H NMR (600 MHz, CDCl<sub>3</sub>) δ 7.77 – 7.75 (m, 2H), 7.66 – 7.63 (m, 2H), 7.47 – 7.40 (m, 4H), 7.39 – 7.35 (m, 1H), 7.30 – 7.25 (m, 1H), 6.19 (dt, *J*<sub>1</sub> = 10.8, *J*<sub>2</sub> = 5.4 Hz, 1H), 6.01 (dddd, *J*<sub>1</sub> = 10.8, *J*<sub>2</sub> = 8.1, *J*<sub>3</sub> = 5.5, *J*<sub>4</sub> = 3.2 Hz, 1H), 4.76 (d, *J* = 6.4 Hz, 2H), 3.56 (dd, *J*<sub>1</sub> = 5.4, *J*<sub>2</sub> = 1.6 Hz, 1H). <sup>13</sup>C NMR (151 MHz, CDCl<sub>3</sub>) δ 152.8, 150.1, 138.8, 134.7, 133.9, 128.9 (2C), 128.6 (2C), 128.1 (2C), 128.0, 126.4, 125.9, 122.5 (2C), 97.4, 67.2, 24.0. HRMS (ESI) *m/z* calcd for C<sub>19</sub>H<sub>17</sub>N<sub>2</sub>O [M+H]<sup>+</sup> = 289.133540; found = 289.133426.

### 1-(tert-butyl)-3-phenyl-4,7-dihydro-1H-oxepino[2,3-c]pyrazole, 1d

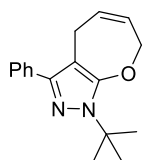

Orange oil, yield 22%; <sup>1</sup>H NMR (600 MHz, CDCl<sub>3</sub>) δ 7.59 – 7.53 (m, 2H), 7.38 (dd, *J*<sub>1</sub> = 8.4, *J*<sub>2</sub> = 7.0 Hz, 1H), 7.31 – 7.27 (m, 1H), 6.07 – 6.03 (m, 1H), 5.89 (dtt, *J*<sub>1</sub> = 11.3, *J*<sub>2</sub> = 5.8, 1.8 Hz, 1H), 4.68 – 4.60 (m, 2H), 3.54 – 3.47 (m, 2H), 1.62 (s, 9H). <sup>13</sup>C NMR (151 MHz, CDCl<sub>3</sub>) δ 153.3, 146.00, 134.8, 132.9, 128.6, 128.5 (2C), 127.9 (2C), 127.2, 125.8, 98.5, 67.3, 58.9, 29.3 (3C), 24.6. HRMS (ESI) *m/z* calcd for C<sub>17</sub>H<sub>21</sub>N<sub>2</sub>O [M+H]<sup>+</sup> = 269.164840; found = 269.164796.

### 3-phenyl-1-(p-tolyl)-4,7-dihydro-1H-oxepino[2,3-c]pyrazole, 1e

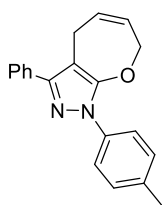

Yellowish oil, yield 65%; <sup>1</sup>H NMR (600 MHz, CDCl<sub>3</sub>) δ 7.66 – 7.59 (m, 4H), 7.43 (dd, *J*<sub>1</sub> = 8.4, *J*<sub>2</sub> = 6.9 Hz, 2H), 7.38 – 7.33 (m, 1H), 7.22 (d, *J* = 8.2 Hz, 1H), 6.18 (dt, *J*<sub>1</sub> = 10.8, *J*<sub>2</sub> = 5.4 Hz, 2H), 6.03 – 5.94 (m, 1H), 4.74 (d, *J* = 6.4 Hz, 2H), 3.57 – 3.52 (m, 2H), 2.38 (s, 3H). <sup>13</sup>C NMR (151 MHz, CDCl<sub>3</sub>) δ 152.6, 149.8, 136.3, 136.3, 134.6, 134.0, 129.5 (2C), 128.6 (2C), 128.1 (2C), 127.9, 125.9, 122.6 (2C), 97.3, 67.2, 24.0, 21.1. HRMS (ESI) *m/z* calcd for C<sub>20</sub>H<sub>19</sub>N<sub>2</sub>O [M+H]<sup>+</sup> = 303.149190; found = 303.148985.

### 1-(2,4-dinitrophenyl)-3-phenyl-4,7-dihydro-1H-oxepino[2,3-c]pyrazole, 1f

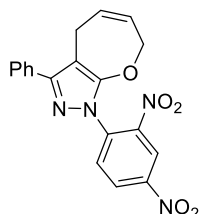

Yellow oil, yield 35%; <sup>1</sup>H NMR (600 MHz, CDCl<sub>3</sub>) δ 8.78 (d, *J* = 2.5 Hz, 1H), 8.50 (dd, *J*<sub>1</sub> = 8.9, *J*<sub>2</sub> = 2.5 Hz, 1H), 8.04 (d, *J* = 8.9 Hz, 1H), 7.65 – 7.61 (m, 2H), 7.50 – 7.40 (m, 4H), 6.17 (dt, *J*<sub>1</sub> = 10.8, *J*<sub>2</sub> = 5.4 Hz, 1H), 5.99 (dddt, *J*<sub>1</sub> = 10.0, *J*<sub>2</sub> = 8.1, *J*<sub>3</sub> = 6.5, *J*<sub>4</sub> = 1.9 Hz, 1H), 4.66 (d, *J* = 6.5 Hz, 2H), 3.54 (dd, *J*<sub>1</sub> = 5.4, *J*<sub>2</sub> = 1.7 Hz, 2H). <sup>13</sup>C NMR (151 MHz, CDCl<sub>3</sub>) δ 154.0, 153.1, 145.3, 135.9, 134.6, 132.7, 129.5, 129.3, 128.9, 128.8 (2C), 128.4, 128.1 (2C), 127.6, 125.5, 121.1, 98.6, 67.3, 24.0. HRMS (ESI) *m/z* calcd for C<sub>19</sub>H<sub>15</sub>N<sub>4</sub>O<sub>5</sub> [M+H]<sup>+</sup> = 379.103696; found = 379.103394.

#### 4. Synthesis of the final spiro compounds

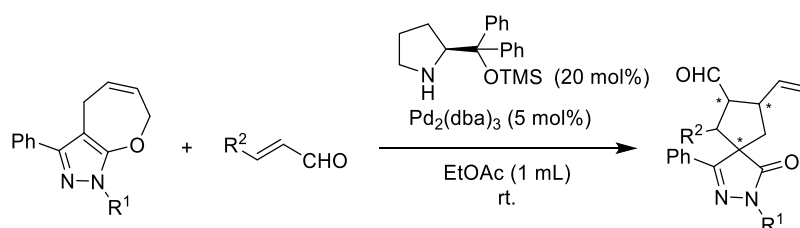

**Scheme S2:** Scheme of the reaction developed

##### 4.1. General procedure for the ring contraction for products **3**

In a closed vial were added the organic catalyst 2-(diphenyl((trimethylsilyl)oxy)methyl)pyrrolidine **4** (20 mol% equiv),  $\alpha,\beta$ -unsaturated aldehyde **2** (1 equiv), pyrazolone **1** (2 equiv, 0.2 mmol),  $\text{Pd}_2(\text{dba})_3$  **5** (5 mol% equiv) and EtOAc (1 mL). The reaction mixture was stirred at room temperature and checked by  $^1\text{H}$ -NMR. The crude mixture was purified by flash column chromatography (*n*-hexane/EtOAc) to obtain the desired product **3**.

##### 4.2. Modified procedure for products **3o-p**, **3r**, **3t-w**

In a closed vial were added the organic catalyst 2-(diphenyl((trimethylsilyl)oxy)methyl)pyrrolidine **4** (20 mol% equiv),  $\alpha,\beta$ -unsaturated aldehyde **2** (5 equiv), pyrazolone **1** (1 equiv, 0.2 mmol),  $\text{Pd}_2(\text{dba})_3$  **5** (5 mol% equiv) and EtOAc (1 mL). The reaction mixture was stirred at room temperature and checked by  $^1\text{H}$ -NMR. The crude mixture was purified by flash column chromatography (*n*-hexane/EtOAc) to obtain the desired product **3**.

##### 4.3. Characterization of compounds **3**

###### 1,6-dimethyl-4-oxo-3-phenyl-8-vinyl-2,3-diazaspiro[4.4]non-1-ene-7-carbaldehyde, **3a**

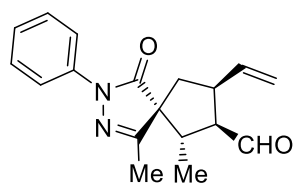

Yellow oil, yield 76%, dr 8.2:1.3:1, ee = 96% major dia.  $^1\text{H}$  NMR (400 MHz,  $\text{CDCl}_3$ )  $\delta$  9.78 (d,  $J$  = 1.3 Hz, 1H), 7.91 – 7.86 (m, 2H), 7.42 – 7.37 (m, 2H), 7.21 – 7.14 (m, 1H), 5.69 (ddd,  $J$  = 16.9, 9.8 Hz, 1H), 5.26 – 5.19 (m, 1H), 5.12 (dd,  $J$  = 10.0, 0.8 Hz, 1H), 3.97 – 3.83 (m, 1H), 3.46 (td,  $J$  = 10.5, 1.2 Hz, 1H), 2.83 (dq,  $J$  = 10.3, 6.8 Hz, 1H), 2.22 (dd,  $J$  = 13.1, 7.4 Hz, 1H), 2.14 (s, 3H), 1.82 (dd,  $J$  = 13.5, 8.5 Hz, 1H), 0.90 (d,  $J$  = 6.8 Hz, 3H).  $^{13}\text{C}$  NMR (101 MHz,  $\text{CDCl}_3$ )  $\delta$  202.7, 175.0, 161.1, 137.9, 137.6, 128.8 (2C), 125.0, 118.7 (2C), 117.3, 63.4, 58.6, 42.9, 40.2, 38.4, 13.2, 12.9. HRMS (ESI)  $m/z$  calcd for  $\text{C}_{18}\text{H}_{21}\text{N}_2\text{O}_2$   $[\text{M}+\text{H}]^+$  = 297.1598, found = 297.1601. The ee was determined by HPLC analysis using Chiralpak AY-H column (hexane/*i*PrOH = 80:20, flow rate 1.0 mL/min,  $\lambda$  = 210 nm):  $t_s$  = 8.5,  $t_R$  = 13.2.  $[\alpha]_D^{21} = -36.8^\circ$  ( $c$  = 0.9,  $\text{CHCl}_3$ , R catalyst).

###### 6-ethyl-1-methyl-4-oxo-3-phenyl-8-vinyl-2,3-diazaspiro[4.4]non-1-ene-7-carbaldehyde, **3b**

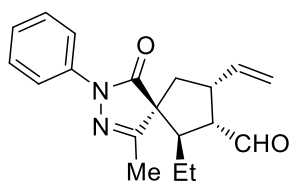

Yellow oil, yield 75%, dr 13.4:3:1, ee = >99% major diastereomer. Major dia:  $^1\text{H}$  NMR (400 MHz,  $\text{CDCl}_3$ )  $\delta$  9.82 (d,  $J$  = 1.9 Hz, 1H), 7.90 (dd,  $J$  = 8.7, 1.1 Hz, 2H), 7.44 – 7.37 (m, 2H), 7.19 (tt,  $J$  = 7.1, 1.0 Hz, 1H), 5.81 – 5.65 (m, 1H), 5.24 (dt,  $J$  = 17.0, 1.1 Hz, 1H), 5.14 (dd,  $J$  = 10.2, 0.4 Hz, 1H), 4.01 (ddd,  $J$  = 20.0, 10.5, 6.9 Hz, 1H), 3.36 (ddd,  $J$  = 10.7, 8.6, 1.8 Hz, 1H), 2.86

(dd,  $J = 15.7, 7.7$  Hz, 1H), 2.20 (s, 3H), 2.07 (dd,  $J = 13.0, 6.8$  Hz, 1H), 1.88 (dd,  $J = 13.0, 10.6$  Hz, 1H), 1.48 – 1.31 (m, 2H), 0.76 (t,  $J = 7.5$  Hz, 3H).  **$^{13}\text{C}$  NMR (101 MHz,  $\text{CDCl}_3$ )**  $\delta$  203.2, 174.9, 162.1, 138.0, 136.7, 128.8 (2C), 125.0, 118.8 (2C), 117.5, 62.7, 58.4, 46.3, 43.3, 39.4, 23.5, 13.1, 12.5. **HRMS (ESI)**  $m/z$  calcd for  $\text{C}_{19}\text{H}_{23}\text{N}_2\text{O}_2$   $[\text{M}+\text{H}]^+ = 311.1754$ , found = 311.1752. The ee was determined by **HPLC** analysis using Chiralpak AY-H column (hexane/*i*PrOH = 95:5, flow rate 1.0 mL/min,  $\lambda = 210$  nm):  $t_s = 21.1$ ,  $t_R = 14.5$ .  $[\alpha]_D^{21} = +23.6^\circ$  ( $c = 0.3$ ,  $\text{CHCl}_3$ ).

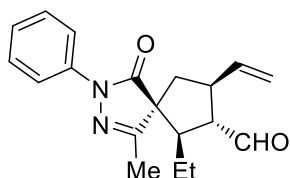

Minor dia:  **$^1\text{H}$  NMR (400 MHz,  $\text{CDCl}_3$ )**  $\delta$  9.69 (d,  $J = 3.5$  Hz, 1H), 7.95 – 7.91 (m, 2H), 7.44 – 7.39 (m, 2H), 7.23 – 7.17 (m, 1H), 5.94 (ddd,  $J = 17.0, 10.1, 8.8$  Hz, 1H), 5.20 (t,  $J = 13.7$  Hz, 2H), 3.51 – 3.39 (m, 1H), 3.03 – 2.88 (m, 2H), 2.25 (s, 3H), 2.24 – 2.15 (m, 2H), 1.46 – 1.34 (m, 1H), 1.34 – 1.22 (m, 1H), 0.76 (t,  $J = 7.5$  Hz, 3H).  **$^{13}\text{C}$  NMR (101 MHz,  $\text{CDCl}_3$ )**  $\delta$  202.3, 175.0, 161.4, 138.0, 136.3, 128.9 (2C), 125.1, 118.7 (2C), 117.6, 63.5, 60.3, 50.9, 45.3, 40.5, 23.7, 16.9, 12.6.

### 1-methyl-4-oxo-3-phenyl-6-propyl-8-vinyl-2,3-diazaspiro[4.4]non-1-ene-7-carbaldehyde, 3c

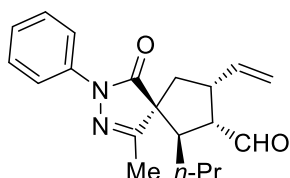

Orange oil, yield 80%, dr 20:3:1, ee = 99%. Major dia:  **$^1\text{H}$  NMR (400 MHz,  $\text{CDCl}_3$ )**  $\delta$  9.80 (d,  $J = 1.9$  Hz, 1H), 7.89 (dd,  $J = 8.7, 1.1$  Hz, 2H), 7.43 – 7.38 (m, 2H), 7.22 – 7.15 (m, 1H), 5.72 (ddd,  $J = 17.0, 9.9, 9.4$  Hz, 1H), 5.27 – 5.19 (m, 1H), 5.13 (ddd,  $J = 10.1, 1.3, 0.7$  Hz, 1H), 4.01 (ddd,  $J = 19.8, 10.6, 6.9$  Hz, 1H), 3.35 (ddd,  $J = 10.7, 8.5, 1.9$  Hz, 1H), 2.93 (td,  $J = 8.4, 6.3$  Hz, 1H), 2.18 (s, 3H), 2.06 (dd,  $J = 13.0, 6.8$  Hz, 1H), 1.87 (dd,  $J = 13.0, 10.8$  Hz, 1H), 1.41 – 1.19 (m, 2H), 1.18 – 1.01 (m, 2H), 0.79 (t,  $J = 7.2$  Hz, 3H).  **$^{13}\text{C}$  NMR (101 MHz,  $\text{CDCl}_3$ )**  $\delta$  203.2, 174.9, 162.0, 138.0, 136.6, 128.9 (2C), 125.0, 118.8 (2C), 117.5, 62.9, 58.5, 44.5, 43.4, 39.3, 32.7, 21.3, 14.1, 13.1. **HRMS (ESI)**  $m/z$  calcd for  $\text{C}_{20}\text{H}_{25}\text{N}_2\text{O}_2$   $[\text{M}+\text{H}]^+ = 325.1911$ , found = 325.1911. The ee was determined by **HPLC** analysis using Chiralpak AY-H column (hexane/*i*PrOH = 95:5, flow rate 1.0 mL/min,  $\lambda = 210$  nm):  $t_s = 10.3$ ,  $t_R = 13.7$ .  $[\alpha]_D^{21} = +34.3^\circ$  ( $c = 0.2$ ,  $\text{CHCl}_3$ ).

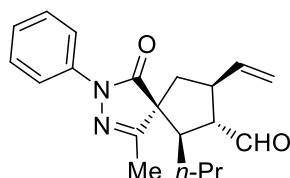

Minor dia:  **$^1\text{H}$  NMR (400 MHz,  $\text{CDCl}_3$ )**  $\delta$  9.67 (d,  $J = 3.8$  Hz, 1H), 7.95 – 7.89 (m, 2H), 7.46 – 7.36 (m, 2H), 7.23 – 7.15 (m, 1H), 5.93 (ddd,  $J = 17.0, 10.1, 8.8$  Hz, 1H), 5.18 (tt,  $J = 10.0, 1.1$  Hz, 2H), 3.52 – 3.36 (m, 1H), 3.05 (dt,  $J = 10.7, 7.1$  Hz, 1H), 2.92 (td,  $J = 10.6, 3.8$  Hz, 1H), 2.24 (s, 3H), 2.21 – 2.15 (m, 2H), 1.33 – 1.00 (m, 4H), 0.78 (t,  $J = 7.1$  Hz, 3H).  **$^{13}\text{C}$  NMR (101 MHz,  $\text{CDCl}_3$ )**  $\delta$  202.3, 174.9, 161.4, 138.0, 136.3, 128.9 (2C), 125.1, 118.7 (2C), 117.6, 63.6, 60.5, 45.4, 40.5, 32.8, 30.9, 21.2, 16.9, 14.0.

### 6-heptyl-1-methyl-4-oxo-3-phenyl-8-vinyl-2,3-diazaspiro[4.4]non-1-ene-7-carbaldehyde, 3d

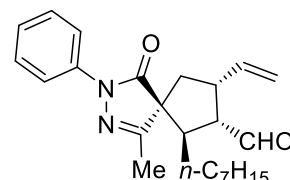

Orange oil, yield 71%, dr 6:1, ee = 95%.  **$^1\text{H}$  NMR (400 MHz,  $\text{CDCl}_3$ )**  $\delta$  9.80 (d,  $J = 1.9$  Hz, 1H), 7.92 – 7.84 (m, 2H), 7.43 – 7.34 (m, 2H), 7.22 – 7.13 (m, 1H), 5.81 – 5.65 (m, 1H), 5.22 (d,  $J = 16.9$  Hz, 1H), 5.13 (dd,  $J = 10.2, 0.5$  Hz, 1H), 4.00 (qd,  $J = 10.4, 7.2$  Hz, 1H), 3.34 (ddd,  $J = 10.6, 8.5, 1.8$  Hz, 1H), 2.91 (dd,  $J = 15.0, 8.1$  Hz, 1H), 2.18 (s, 3H), 2.05 (dd,  $J = 13.0, 6.8$  Hz, 1H), 1.87 (dd,  $J = 13.0, 10.8$  Hz, 1H), 1.41 – 0.98 (m, 12H), 0.81 (t,  $J = 7.0$  Hz, 3H).  **$^{13}\text{C}$  NMR (101 MHz,  $\text{CDCl}_3$ )**  $\delta$  203.2, 174.9, 162.1, 138.0, 136.6, 128.8 (2C), 125.0, 118.8 (2C), 117.5, 62.8, 58.6, 44.7, 43.4, 39.4, 31.6, 30.5, 29.5, 28.9, 27.9, 22.5, 14.0, 13.1. **HRMS (ESI)**  $m/z$  calcd for  $\text{C}_{24}\text{H}_{33}\text{N}_2\text{O}_2$   $[\text{M}+\text{H}]^+ = 381.2537$ , found = 381.2535. The ee was determined by **HPLC** analysis using

Chiralpak AY-H column (hexane/*i*PrOH = 95:5, flow rate 1.0 mL/min,  $\lambda$  = 210 nm):  $t_S$  = 7.2,  $t_R$  = 10.0.  $[\alpha]^{21}_D$  major = -16.2° (c = 0.8, CHCl<sub>3</sub>) (*R* catalyst).  $[\alpha]^{21}_D$  minor = +13.1° (c = 0.4, CHCl<sub>3</sub>).

### 1-methyl-4-oxo-3,6-diphenyl-8-vinyl-2,3-diazaspiro[4.4]non-1-ene-7-carbaldehyde, 3e

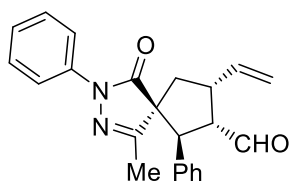

Orange oil, yield 79%, dr 7.3:2:1, ee = >99%. <sup>1</sup>H NMR (400 MHz, CDCl<sub>3</sub>)  $\delta$  9.77 (d, *J* = 1.5 Hz, 1H), 7.55 – 7.49 (m, 2H), 7.32 – 7.26 (m, 2H), 7.22 – 7.08 (m, 6H), 5.81 (dt, *J* = 16.9, 9.7 Hz, 1H), 5.34 – 5.26 (m, 1H), 5.18 (dd, *J* = 10.0, 0.7 Hz, 1H), 4.27 (td, *J* = 10.6, 1.5 Hz, 1H), 4.12 (dd, *J* = 17.8, 8.8 Hz, 1H), 4.04 (d, *J* = 10.7 Hz, 1H), 2.33 (dd, *J* = 13.4, 7.5 Hz, 1H), 2.28 (s, 3H), 1.98 (dd, *J* = 13.4, 8.5 Hz, 1H). <sup>13</sup>C NMR (101 MHz, CDCl<sub>3</sub>)  $\delta$  201.9, 174.6, 160.2, 137.4, 137.2, 135.1, 128.6 (2C), 128.5 (2C), 127.9, 127.6 (2C), 125.2, 119.3 (2C), 117.7, 64.5, 56.6, 50.7, 43.0, 38.6, 13.3. HRMS (ESI) *m/z* calcd for C<sub>23</sub>H<sub>23</sub>N<sub>2</sub>O<sub>2</sub> [M+H]<sup>+</sup> = 359.1754, found = 359.1755. The ee was determined by HPLC analysis using Chiralpak AY-H column (hexane/*i*PrOH = 95:5, flow rate 1.0 mL/min,  $\lambda$  = 210 nm):  $t_S$  = 17.2,  $t_R$  = 28.5.  $[\alpha]^{21}_D$  = +8.9° (c = 0.8, CHCl<sub>3</sub>).

### 6-(2-methoxyphenyl)-1-methyl-4-oxo-3-phenyl-8-vinyl-2,3-diazaspiro[4.4]non-1-ene-7-carbaldehyde, 3f

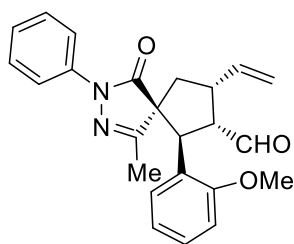

Orange oil, yield 70%, dr 3:2:1, ee = 98%. Major dia: <sup>1</sup>H NMR (400 MHz, CDCl<sub>3</sub>)  $\delta$  9.77 (d, *J* = 1.5 Hz, 1H), 7.61 – 7.57 (m, 2H), 7.34 – 7.27 (m, 2H), 7.15 – 7.05 (m, 2H), 6.80 (d, *J* = 7.8 Hz, 1H), 6.77 (d, *J* = 2.4 Hz, 1H), 6.67 (ddd, *J* = 8.3, 2.5, 0.8 Hz, 1H), 5.79 (dt, *J* = 16.9, 9.8 Hz, 1H), 5.29 (dt, *J* = 16.9, 1.1 Hz, 1H), 5.17 (dd, *J* = 10.0, 0.8 Hz, 1H), 4.25 (td, *J* = 10.7, 1.5 Hz, 1H), 4.16 – 4.05 (m, 1H), 4.00 (d, *J* = 10.8 Hz, 1H), 3.67 (s, 3H), 2.37 – 2.28 (m, 1H), 2.26 (s, 3H), 1.97 (dd, *J* = 13.4, 8.6 Hz, 1H). <sup>13</sup>C NMR (101 MHz, CDCl<sub>3</sub>)  $\delta$  201.9, 174.6, 160.2, 159.6, 137.5, 137.3, 136.8, 129.5, 128.7 (2C), 125.1, 120.0, 119.1 (2C), 117.7, 113.4, 113.3, 64.4, 56.7, 55.1, 50.7, 42.9, 38.7, 13.3. HRMS (ESI) *m/z* calcd for C<sub>24</sub>H<sub>25</sub>N<sub>2</sub>O<sub>3</sub> [M+H]<sup>+</sup> = 389.1860, found = 389.1863. The ee was determined by HPLC analysis using Chiralpak AY-H column (hexane/*i*PrOH = 90:10, flow rate 1.0 mL/min,  $\lambda$  = 210 nm):  $t_S$  = 17.9,  $t_R$  = 8.9.  $[\alpha]^{21}_D$  = +12.1° (c = 0.7, CHCl<sub>3</sub>).

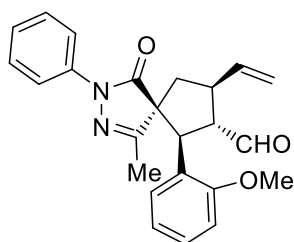

Minor dia: <sup>1</sup>H NMR (400 MHz, CDCl<sub>3</sub>)  $\delta$  9.69 (d, *J* = 2.4 Hz, 1H), 7.53 – 7.46 (m, 2H), 7.28 (dd, *J* = 5.7, 3.6 Hz, 2H), 7.13 – 7.09 (m, 2H), 6.78 (d, *J* = 7.7 Hz, 1H), 6.76 – 6.73 (m, 1H), 6.69 (ddd, *J* = 8.3, 2.5, 0.8 Hz, 1H), 6.09 (ddd, *J* = 17.1, 10.1, 8.4 Hz, 1H), 5.19 (dt, *J* = 17.0, 1.1 Hz, 1H), 5.14 (dd, *J* = 10.1, 0.7 Hz, 1H), 4.04 (ddd, *J* = 12.5, 10.4, 2.3 Hz, 1H), 3.69 (s, 3H), 3.64 (d, *J* = 12.4 Hz, 1H), 3.23 – 3.04 (m, 1H), 2.42 – 2.36 (m, 1H), 2.30 (s, 3H), 2.13 (dd, *J* = 14.1, 8.1 Hz, 1H). <sup>13</sup>C NMR (101 MHz, CDCl<sub>3</sub>)  $\delta$  201.6, 175.0, 160.3, 159.6, 138.6, 137.4, 135.2, 129.6, 128.6 (2C), 125.1, 120.0, 119.2 (2C), 116.7, 113.7, 113.4, 63.9, 58.3, 55.2, 54.1, 45.1, 37.0, 13.4.

**1-methyl-4-oxo-3-phenyl-6-(*p*-tolyl)-8-vinyl-2,3-diazaspiro[4.4]non-1-ene-7-carbaldehyde, 3g**

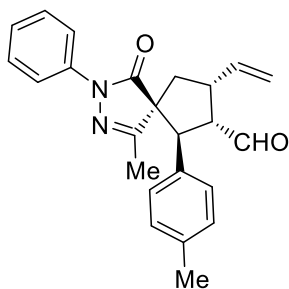

Yellow oil, yield 76%, dr 5:3:1, ee = 99%. Major dia: <sup>1</sup>H NMR (400 MHz, CDCl<sub>3</sub>) δ 9.69 (d, *J* = 1.6 Hz, 1H), 7.48 (dd, *J* = 8.7, 1.1 Hz, 2H), 7.25 – 7.20 (m, 2H), 7.07 – 6.99 (m, 3H), 6.91 (d, *J* = 8.0 Hz, 2H), 5.72 (dt, *J* = 16.9, 9.7 Hz, 1H), 5.21 (dt, 1H), 5.10 (dd, *J* = 10.1, 0.8 Hz, 1H), 4.17 (td, *J* = 10.7, 1.5 Hz, 1H), 4.08 – 3.97 (m, 1H), 3.93 (d, *J* = 10.8 Hz, 1H), 2.24 (dd, *J* = 13.4, 7.5 Hz, 1H), 2.19 (s, 3H), 2.13 (s, 3H), 1.89 (dd, *J* = 13.4, 8.5 Hz, 1H). <sup>13</sup>C NMR (101 MHz, CDCl<sub>3</sub>) δ 202.1, 174.7, 160.3, 137.6, 137.5, 137.3, 132.1, 129.3 (2C), 128.6 (2C), 127.5 (2C), 125.1, 119.3 (2C), 117.6, 64.5, 56.7, 50.5, 43.0, 38.7, 21.0, 13.3. HRMS (ESI) *m/z* calcd for C<sub>24</sub>H<sub>25</sub>N<sub>2</sub>O<sub>2</sub> [M+H]<sup>+</sup> = 373.1911, found = 373.1915. The ee was determined by HPLC analysis using Chiralpak OZ-H column (hexane/*i*PrOH = 98:2, flow rate 1.0 mL/min, λ = 210 nm): *t*<sub>S</sub> = 22.3, *t*<sub>R</sub> = 24.2. [α]<sub>D</sub><sup>21</sup> = +19.1° (c = 0.17, CHCl<sub>3</sub>)

**6-(4-bromophenyl)-1-methyl-4-oxo-3-phenyl-8-vinyl-2,3-diazaspiro[4.4]non-1-ene-7-carbaldehyde, 3h**

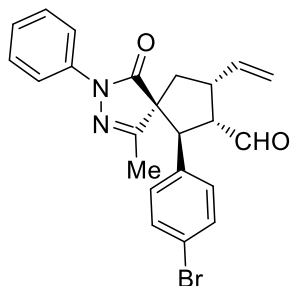

Orange oil, yield 72%, dr 5:3:1, ee = 98%. Major dia: <sup>1</sup>H NMR (400 MHz, CDCl<sub>3</sub>) δ 9.76 (d, *J* = 1.3 Hz, 1H), 7.57 – 7.53 (m, 2H), 7.34 – 7.29 (m, 4H), 7.17 – 7.11 (m, 1H), 7.11 – 7.08 (m, 2H), 5.77 (dt, *J* = 16.8, 9.7 Hz, 1H), 5.30 (dt, *J* = 16.9, 1.1 Hz, 1H), 5.19 (dd, *J* = 10.1, 0.8 Hz, 1H), 4.22 (td, *J* = 10.7, 1.3 Hz, 1H), 4.16 – 4.06 (m, 1H), 3.98 (d, *J* = 10.6 Hz, 1H), 2.35 – 2.29 (m, 1H), 2.25 (s, 3H), 2.01 – 1.90 (m, 1H). <sup>13</sup>C NMR (101 MHz, CDCl<sub>3</sub>) δ 201.6, 174.4, 160.0, 137.3, 137.0, 134.4, 131.7 (2C), 129.4 (2C), 128.7 (2C), 125.4, 122.0, 119.2 (2C), 118.0, 64.3, 56.8, 49.9, 42.8, 38.7, 13.3. HRMS (ESI) *m/z* calcd for C<sub>23</sub>H<sub>22</sub>BrN<sub>2</sub>O<sub>2</sub> [M+H]<sup>+</sup> = 437.0859, found = 437.0849. The ee was determined by HPLC analysis using Chiralpak OZ-H column (hexane/*i*PrOH = 93:7, flow rate 1.0 mL/min, λ = 210 nm): *t*<sub>S</sub> = 10.0, *t*<sub>R</sub> = 13.4. [α]<sub>D</sub><sup>21</sup> = +41.3° (c = 0.2, CHCl<sub>3</sub>).

**6-(4-chlorophenyl)-1-methyl-4-oxo-3-phenyl-8-vinyl-2,3-diazaspiro[4.4]non-1-ene-7-carbaldehyde, 3i**

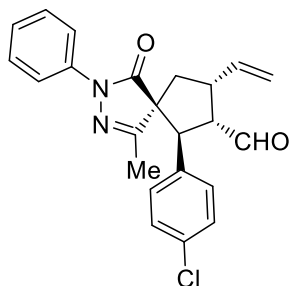

Orange oil, yield 71%, dr 3:3:1, ee = >99%. Major dia: <sup>1</sup>H NMR (400 MHz, CDCl<sub>3</sub>) δ 9.76 (d, *J* = 1.3 Hz, 1H), 7.58 – 7.53 (m, 2H), 7.34 – 7.29 (m, 2H), 7.18 – 7.10 (m, 5H), 5.77 (dt, *J* = 16.9, 9.7 Hz, 1H), 5.30 (dt, *J* = 16.9, 1.1 Hz, 1H), 5.19 (dd, *J* = 10.0, 0.7 Hz, 1H), 4.22 (td, *J* = 10.6, 1.3 Hz, 1H), 4.17 – 4.06 (m, 1H), 3.99 (d, *J* = 10.6 Hz, 1H), 2.36 – 2.29 (m, 1H), 2.26 (s, 3H), 1.96 (dd, *J* = 13.5, 8.4 Hz, 1H). <sup>13</sup>C NMR (101 MHz, CDCl<sub>3</sub>) δ 201.6, 174.4, 160.0, 137.3, 137.0, 133.9, 133.8, 129.0 (2C), 128.8 (2C), 128.7 (2C), 125.3, 119.2 (2C), 117.9, 64.3, 56.8, 49.9, 42.8, 38.7, 13.2. HRMS (ESI) *m/z* calcd for C<sub>23</sub>H<sub>22</sub>ClN<sub>2</sub>O<sub>2</sub> [M+H]<sup>+</sup> = 393.1364, found = 393.1363. The ee was determined by HPLC analysis using Chiralpak AY-H column (hexane/*i*PrOH = 93:7, flow rate 1.0 mL/min, λ = 210 nm): *t*<sub>S</sub> = 12.1, *t*<sub>R</sub> = 22.6. [α]<sub>D</sub><sup>21</sup> = +37.5° (c = 0.2, CHCl<sub>3</sub>).

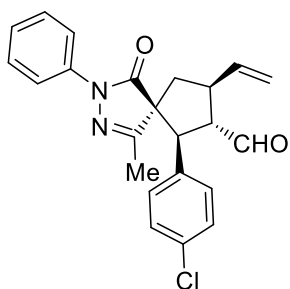

Minor dia, ee = 90%. **<sup>1</sup>H NMR (400 MHz, CDCl<sub>3</sub>)** δ 9.69 (d, *J* = 2.3 Hz, 1H), 7.47 – 7.43 (m, 2H), 7.31 – 7.26 (m, 2H), 7.20 – 7.11 (m, 5H), 6.09 (ddd, *J* = 17.1, 10.1, 8.4 Hz, 1H), 5.21 (dt, *J* = 17.1, 1.1 Hz, 1H), 5.16 (dd, *J* = 10.1, 0.6 Hz, 1H), 4.00 (ddd, *J* = 12.6, 10.5, 2.3 Hz, 1H), 3.65 (d, *J* = 12.3 Hz, 1H), 3.17 – 3.04 (m, 1H), 2.39 (dd, *J* = 14.2, 9.8 Hz, 1H), 2.30 (s, 3H), 2.20 – 2.10 (m, 1H). **<sup>13</sup>C NMR (101 MHz, CDCl<sub>3</sub>)** δ 201.3, 174.8, 160.2, 138.3, 137.1, 134.1, 132.3, 129.0 (2C), 128.7 (2C), 128.7 (2C), 125.3, 119.2 (2C), 117.0, 63.7, 58.2, 53.0, 45.4, 37.0, 13.4.

### 1-methyl-6-(3-nitrophenyl)-4-oxo-3-phenyl-8-vinyl-2,3-diazaspiro[4.4]non-1-ene-7-carbaldehyde, 3j

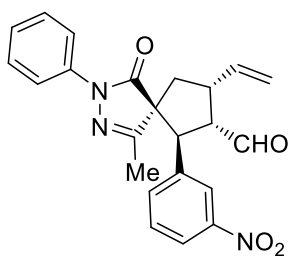

Orange oil, yield 86%, dr 2:1, ee = >99%. Major dia: **<sup>1</sup>H NMR (400 MHz, CDCl<sub>3</sub>)** δ 9.79 (d, *J* = 0.6 Hz, 1H), 8.11 (t, *J* = 1.7 Hz, 1H), 8.01 (dd, *J* = 8.2, 1.3 Hz, 1H), 7.58 – 7.51 (m, 3H), 7.37 (t, *J* = 8.0 Hz, 1H), 7.29 (t, *J* = 8.0 Hz, 2H), 7.12 (t, *J* = 7.4 Hz, 1H), 5.77 (dt, *J* = 16.9, 9.7 Hz, 1H), 5.34 (d, *J* = 16.8 Hz, 1H), 5.22 (d, *J* = 10.2 Hz, 1H), 4.32 (t, *J* = 10.6 Hz, 1H), 4.17 (dt, *J* = 15.6, 7.7 Hz, 1H), 4.11 (t, *J* = 7.3 Hz, 1H), 2.38 (dd, *J* = 13.5, 7.6 Hz, 1H), 2.30 (s, 3H), 2.06 – 1.95 (m, 1H). **<sup>13</sup>C NMR (101 MHz, CDCl<sub>3</sub>)** δ 201.1, 174.0, 159.7, 148.2, 137.7, 137.1, 136.7, 133.8, 129.6, 128.8 (2C), 125.4, 123.0, 122.8, 118.9 (2C), 118.3, 64.2, 56.8, 49.7, 42.7, 38.6, 13.3. **HRMS (ESI)** *m/z* calcd for C<sub>23</sub>H<sub>22</sub>N<sub>3</sub>O<sub>4</sub> [M+H]<sup>+</sup> = 404.1605, found = 404.1604. The ee was determined by **HPLC** analysis using Chiralpak AY-H column (hexane/*i*PrOH = 80:20, flow rate 1.0 mL/min, λ = 210 nm): *t*<sub>S</sub> = 16.5, *t*<sub>R</sub> = 38.2. **[α]<sup>21</sup><sub>D</sub> major dia** = -349.4° (*c* = 0.2, CHCl<sub>3</sub>) (*R* catalyst). **[α]<sup>21</sup><sub>D</sub> major dia** = +37.0° (*c* = 0.2, CHCl<sub>3</sub>).

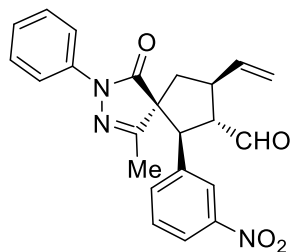

Minor dia: **<sup>1</sup>H NMR (400 MHz, CDCl<sub>3</sub>)** δ = 9.76 (d, *J* = 1.8 Hz, 1H), 8.06 – 7.98 (m, 2H), 7.54 (d, *J* = 7.7 Hz, 1H), 7.45 (d, *J* = 7.6 Hz, 1H), 7.39 (t, *J* = 7.9 Hz, 1H), 7.29 – 7.21 (m, 3H), 7.09 (t, *J* = 7.5 Hz, 1H), 6.15 (ddd, *J* = 17.1, 10.0, 8.5 Hz, 1H), 5.23 (dd, *J* = 16.3, 13.7 Hz, 2H), 4.11 – 4.05 (m, 1H), 3.78 (d, *J* = 12.1 Hz, 1H), 3.18 – 3.05 (m, 1H), 2.43 (dd, *J* = 14.3, 9.6 Hz, 1H), 2.34 (s, 3H), 2.25 – 2.14 (m, 1H). **<sup>13</sup>C NMR (101 MHz, CDCl<sub>3</sub>)** δ = 200.8, 171.5, 160.0, 148.1, 138.1, 137.0, 136.4, 133.7, 129.6, 128.7 (2C), 125.4, 123.2, 122.7, 118.8 (2C), 117.5, 63.6, 58.1, 52.5, 45.8, 37.1, 14.1.

### 6-(3-methoxyphenyl)-1-methyl-4-oxo-3-phenyl-8-vinyl-2,3-diazaspiro[4.4]non-1-ene-7-carbaldehyde, 3k

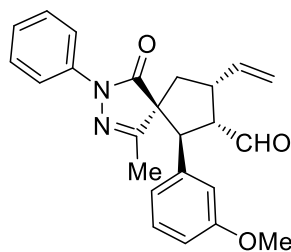

Yellow oil, yield 77%, dr 6:2:1, ee = 97%. Major dia: **<sup>1</sup>H NMR (400 MHz, CDCl<sub>3</sub>)** δ 9.77 (d, *J* = 1.5 Hz, 1H), 7.60 – 7.56 (m, 2H), 7.33 – 7.27 (m, 2H), 7.15 – 7.06 (m, 2H), 6.83 – 6.78 (m, 1H), 6.78 – 6.75 (m, 1H), 6.67 (ddd, *J* = 8.3, 2.6, 0.9 Hz, 1H), 5.79 (dt, *J* = 16.9, 9.8 Hz, 1H), 5.33 – 5.25 (m, 1H), 5.17 (ddd, *J* = 10.1, 1.3, 0.5 Hz, 1H), 4.25 (td, *J* = 10.7, 1.5 Hz, 1H), 4.12 (dd, *J* = 12.7, 5.5 Hz, 1H), 4.00 (d, *J* = 10.8 Hz, 1H), 3.67 (s, 3H), 2.37 – 2.28 (m, 1H), 2.26 (s, 3H), 2.01 – 1.92 (m, 1H). **<sup>13</sup>C NMR (101 MHz, CDCl<sub>3</sub>)** δ 201.9, 174.6, 160.2, 159.6, 137.5, 137.2, 136.7, 129.5, 128.7 (2C), 125.1, 120.0, 119.1 (2C), 117.7, 113.4, 113.3, 64.4, 56.7, 55.1, 50.7, 42.9, 38.7, 22.6. **HRMS (ESI)** *m/z* calcd for C<sub>24</sub>H<sub>25</sub>N<sub>2</sub>O<sub>3</sub> [M+H]<sup>+</sup> = 389.1860, found = 389.1860. The ee was determined by **HPLC** analysis using Chiralpak AY-H column (hexane/*i*PrOH = 95:5, flow rate 1.0 mL/min, λ = 210 nm): *t*<sub>S</sub> = 36.6, *t*<sub>R</sub> = 28.7. **[α]<sup>21</sup><sub>D</sub>** = +158.1° (*c* = 0.1, CHCl<sub>3</sub>).

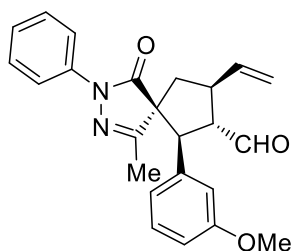

Minor dia: **<sup>1</sup>H NMR (400 MHz, CDCl<sub>3</sub>)** δ 9.69 (d, *J* = 2.4 Hz, 1H), 7.51 – 7.46 (m, 2H), 7.31 – 7.27 (m, 1H), 7.26 – 7.23 (m, 1H), 7.14 – 7.08 (m, 2H), 6.78 (dd, *J* = 7.7, 0.6 Hz, 1H), 6.76 – 6.73 (m, 1H), 6.69 (ddd, *J* = 8.3, 2.5, 0.8 Hz, 1H), 6.09 (ddd, *J* = 17.1, 10.1, 8.4 Hz, 1H), 5.23 – 5.16 (m, 1H), 5.14 (dd, *J* = 10.1, 0.7 Hz, 1H), 4.04 (ddd, *J* = 12.5, 10.4, 2.3 Hz, 1H), 3.69 (s, 3H), 3.64 (d, *J* = 12.4 Hz, 1H), 3.22 – 3.08 (m, 1H), 2.43 – 2.36 (m, 1H), 2.30 (s, 3H), 2.13 (dd, *J* = 14.1, 8.1 Hz, 1H). **<sup>13</sup>C NMR (101 MHz, CDCl<sub>3</sub>)** δ 201.6, 175.0, 160.3, 159.6, 138.6, 137.3, 135.2, 129.6, 128.6 (2C), 125.1, 119.9, 119.2 (2C), 116.7, 113.7, 113.4, 63.8, 58.3, 55.1, 54.0, 45.1, 31.6, 22.6.

### 1-ethyl-4-oxo-3,6-diphenyl-8-vinyl-2,3-diazaspiro[4.4]non-1-ene-7-carbaldehyde, 3m

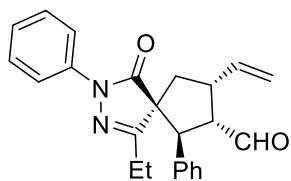

Orange oil, yield 96%, dr 3:1:1, ee = >99%. **<sup>1</sup>H NMR (400 MHz, CDCl<sub>3</sub>)** δ 9.77 (d, *J* = 1.5 Hz, 1H), 7.58 – 7.52 (m, 2H), 7.34 – 7.26 (m, 2H), 7.21 – 7.07 (m, 6H), 5.79 (ddd, *J* = 16.9, 9.7 Hz, 1H), 5.33 – 5.25 (m, 1H), 5.17 (dd, *J* = 10.0, 0.8 Hz, 1H), 4.30 – 4.03 (m, 3H), 2.70 (dq, *J* = 17.5, 7.4 Hz, 1H), 2.54 (dq, *J* = 17.5, 7.3 Hz, 1H), 2.32 (dd, *J* = 13.4, 7.5 Hz, 1H), 1.98 (dd, *J* = 13.4, 8.5 Hz, 1H), 1.35 (t, *J* = 7.3 Hz, 3H). **<sup>13</sup>C NMR (101 MHz, CDCl<sub>3</sub>)** δ 202.2, 175.0, 164.0, 137.7, 137.4, 135.4, 128.8, 128.7, 128.0, 127.8, 125.3, 119.4, 117.8, 64.8, 56.8, 51.0, 43.2, 38.8, 20.6, 9.6. **HRMS** (ESI) *m/z* calcd for C<sub>24</sub>H<sub>24</sub>N<sub>2</sub>O<sub>2</sub> [M+H]<sup>+</sup> = 373.1838, found = 373.1911. The ee was determined by **HPLC** analysis using Chiralpak AY-H column (hexane/*i*PrOH = 90:10, flow rate 1.0 mL/min, λ = 230 nm): t<sub>S</sub> = 9.6, t<sub>R</sub> = 16.0. [α]<sub>D</sub><sup>21</sup> = +128.1° (c = 0.2, CHCl<sub>3</sub>).

### 6-methyl-4-oxo-1,3-diphenyl-8-vinyl-2,3-diazaspiro[4.4]non-1-ene-7-carbaldehyde, 3n

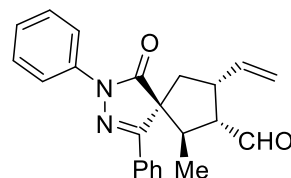

Transparent oil, yield 96%, dr 5:1, ee = 98%. **<sup>1</sup>H NMR (400 MHz, CDCl<sub>3</sub>)** δ 9.82 (d, *J* = 1.3 Hz, 1H), 8.03 – 7.98 (m, 2H), 7.93 – 7.87 (m, 2H), 7.50 – 7.48 (m, 2H), 7.47 – 7.42 (m, *J* = 11.4, 4.7 Hz, 3H), 7.23 (t, *J* = 7.4 Hz, 1H), 5.77 (dt, *J* = 16.9, 9.8 Hz, 1H), 5.28 – 5.22 (m, 1H), 5.14 (dd, *J* = 10.0, 0.8 Hz, 1H), 4.09 – 3.95 (m, 1H), 3.60 (td, *J* = 10.6, 1.2 Hz, 1H), 3.34 – 3.27 (m, 1H), 2.41 (dd, *J* = 13.8, 8.0 Hz, 1H), 2.31 (dd, *J* = 13.9, 8.3 Hz, 1H), 0.95 (d, *J* = 6.7 Hz, 3H). **<sup>13</sup>C NMR (101 MHz, CDCl<sub>3</sub>)** δ 202.7, 175.6, 158.3, 137.8, 130.4, 130.3, 129.0 (2C), 128.9 (2C), 126.8 (2C), 126.4, 125.4, 119.0 (2C), 117.3, 63.7, 58.4, 43.1, 41.3, 39.4, 13.5. **HRMS** (ESI) *m/z* calcd for C<sub>23</sub>H<sub>23</sub>N<sub>2</sub>O<sub>2</sub> [M+H]<sup>+</sup> = 359.1754, found = 359.1748. The ee was determined by **HPLC** analysis using Chiralpak AY-H column (hexane/*i*PrOH = 97:3, flow rate 1.0 mL/min, λ = 210 nm): t<sub>S</sub> = 12.3, t<sub>R</sub> = 19.1. [α]<sub>D</sub><sup>21</sup> = +28.6° (c = 1.0, CHCl<sub>3</sub>).

### 6-ethyl-4-oxo-1,3-diphenyl-8-vinyl-2,3-diazaspiro[4.4]non-1-ene-7-carbaldehyde, 3o

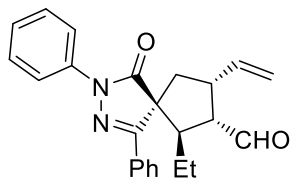

Transparent oil, yield 62%, 20:1, ee = 99%. **<sup>1</sup>H NMR (600 MHz, CDCl<sub>3</sub>)** δ 9.88 (d, *J* = 1.8 Hz, 1H), 8.02 – 7.98 (m, 4H), 7.51 (q, *J* = 6.4 Hz, 3H), 7.45 (t, *J* = 7.7 Hz, 2H), 7.23 (t, *J* = 7.4 Hz, 1H), 5.78 (dt, *J*<sub>1</sub> = 16.8, *J*<sub>2</sub> = 9.6 Hz, 1H), 5.25 (d, *J* = 17.0 Hz, 1H), 5.14 (d, *J* = 10.1 Hz, 1H), 4.17 (qd, *J*<sub>1</sub> = 10.5, *J*<sub>2</sub> = 7.3 Hz, 1H), 3.47 (ddd, *J*<sub>1</sub> = 10.8, *J*<sub>2</sub> = 8.2, *J*<sub>3</sub> = 1.8 Hz, 1H), 3.45 – 3.37 (m, 1H), 2.38 (dd, *J*<sub>1</sub> = 13.4, *J*<sub>2</sub> = 10.8 Hz, 1H), 2.23 (dd, *J*<sub>1</sub> = 13.4, *J*<sub>2</sub> = 7.0 Hz, 1H), 1.50 – 1.36 (m, 2H), 0.70 (t, *J* = 7.5 Hz, 3H). **<sup>13</sup>C NMR (151 MHz, CDCl<sub>3</sub>)** δ = 203.7, 175.5, 159.1, 138.1, 137.0, 130.5, 130.4, 129.1 (2C), 129.1 (2C), 127.0 (2C), 125.5, 119.2 (2C), 117.7, 63.2, 58.6, 47.5, 43.6, 40.7, 23.9, 12.8. **HRMS** (ESI)

$m/z$  calcd for  $C_{24}H_{25}N_2O_2$   $[M+H]^+ = 373.1911$ ; found = 373.1910. The ee was determined by **HPLC** analysis using Chiralpak ODH column (98/2 heptane/*i*-PrOH, flow rate 0.5 ml/min;  $\lambda = 322$  nm,  $t_R = 13.6$  min.,  $t_S = 16.4$  min).  $[\alpha]^{25}_D = +16.3^\circ$  ( $c = 1.4$ ,  $CHCl_3$ ).

#### 6-butyl-4-oxo-1,3-diphenyl-8-vinyl-2,3-diazaspiro[4.4]non-1-ene-7-carbaldehyde, 3p

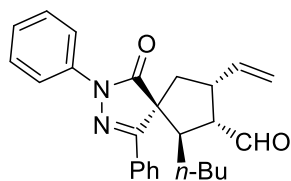

Transparent oil, yield 73%, dr 9:1, ee = 98% major dia/94% minor dia.  **$^1H$  NMR (600 MHz,  $CDCl_3$ )**  $\delta$  9.88 (s, 1H), 8.03–7.97 (m, 4H), 7.51 (d,  $J = 7.7$  Hz, 3H), 7.47 – 7.43 (m, 2H), 7.24 (t,  $J = 7.4$  Hz, 1H), 5.83 – 5.73 (m, 1H), 5.25 (d,  $J = 16.8$  Hz, 1H), 5.14 (d,  $J = 10.1$  Hz, 1H), 4.18 (qd,  $J_1 = 10.3$ ,  $J_2 = 7.1$  Hz, 1H), 3.48 (dd,  $J_1 = 9.0$ ,  $J_2 = 5.6$  Hz, 2H), 2.38 (dd,  $J_1 = 13.4$ ,  $J_2 = 10.9$  Hz, 1H), 2.22 (dd,  $J_1 = 13.4$ ,  $J_2 = 7.0$  Hz, 1H), 1.45 – 1.31 (m, 2H), 1.17 – 0.97 (m, 4H), 0.70 (t,  $J = 7.3$  Hz, 3H).  **$^{13}C$  NMR (151 MHz,  $CDCl_3$ )**  $\delta$  203.7, 175.6, 159.0, 138.1, 137.0, 130.5, 130.4, 129.1 (2C), 129.1 (2C), 127.0 (2C), 125.6, 119.3 (2C), 117.7, 63.3, 58.9, 45.7, 43.7, 40.7, 30.6, 30.3, 22.7, 13.9. **HRMS (ESI)**  $m/z$  calcd for  $C_{26}H_{27}N_2O$   $[M+H]^+ = 383.2118$ ; found = 383.2117. The ee was determined by **HPLC** analysis using Chiralpak IA column (95/5 heptane/*i*-PrOH, flow rate 1.0 ml/min;  $\lambda = 190$  nm, major dia:  $t_R = 7.2$  min.,  $t_S = 14.9$  min, minor dia:  $t_S = 9.2$  min.,  $t_R = 10.2$  min).  $[\alpha]^{25}_D = +37.2^\circ$  ( $c = 0.7$ ,  $CHCl_3$ ).

#### 4-oxo-1,3,6-triphenyl-8-vinyl-2,3-diazaspiro[4.4]non-1-ene-7-carbaldehyde, 3q

Orange oil, yield 98%, dr 1:1, ee = 99% dia 1, ee = 66% dia 2.

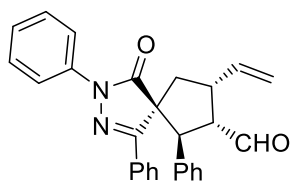

Dia 1:  **$^1H$  NMR (400 MHz,  $CDCl_3$ )**  $\delta$  9.82 (d,  $J = 1.3$  Hz, 1H), 7.99 (dd,  $J = 6.6$ , 3.1 Hz, 2H), 7.61 – 7.57 (m, 2H), 7.55 – 7.52 (m, 3H), 7.35 – 7.29 (m, 3H), 7.17 – 7.07 (m, 7H), 5.92 (dt,  $J = 16.8$ , 9.8 Hz, 1H), 5.33 (d,  $J = 16.6$  Hz, 1H), 5.21 (d,  $J = 10.1$  Hz, 1H), 4.55 (d,  $J = 10.7$  Hz, 1H), 4.45 (t,  $J = 10.5$  Hz, 1H), 4.28 – 4.17 (m, 1H), 2.54 (dd,  $J = 8.0$ , 2.1 Hz, 2H).  **$^{13}C$  NMR (101 MHz,  $CDCl_3$ )**  $\delta$  202.0, 175.2, 157.3, 137.6, 137.3, 134.9, 130.6, 130.5, 129.1 (2C), 128.7 (2C), 128.3 (2C), 127.9, 127.7 (2C), 126.8 (2C), 125.5, 119.6 (2C), 117.7, 64.7, 56.0, 51.7, 43.2, 39.5. **HRMS (ESI)**  $m/z$  calcd for  $C_{28}H_{25}N_2O_2$   $[M+H]^+ = 421.1911$ , found = 421.1912. The ee was determined by **HPLC** analysis using Chiralpak AY-H column (heptane/*i*PrOH = 98:2, flow rate 0.5 mL/min,  $\lambda = 254$  nm):  $t_S = 39.6$ ,  $t_R = 17.9$ .  $[\alpha]^{21}_D = +8.0^\circ$  ( $c = 0.6$ ,  $CHCl_3$ ).

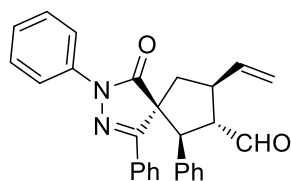

Dia 2:  **$^1H$  NMR (400 MHz,  $CDCl_3$ )**  $\delta$  9.72 (d,  $J = 2.5$  Hz, 1H), 8.01 (ddd,  $J = 7.8$ , 5.2, 2.0 Hz, 2H), 7.62 – 7.54 (m, 3H), 7.47 (dd,  $J = 8.7$ , 1.1 Hz, 2H), 7.35 – 7.28 (m, 2H), 7.18 – 7.01 (m, 5H), 6.16 – 6.04 (m, 1H), 5.31 (d,  $J = 17.1$  Hz, 1H), 5.21 (d,  $J = 10.1$  Hz, 1H), 4.14 (dt,  $J = 22.2$ , 7.4 Hz, 1H), 3.52 – 3.40 (m, 1H), 2.88 (dd,  $J = 14.5$ , 9.6 Hz, 1H), 2.54 (dd,  $J = 8.0$ , 1.9 Hz, 1H), 2.41 (dd,  $J = 14.5$ , 9.5 Hz, 1H).  **$^{13}C$  NMR (101 MHz,  $CDCl_3$ )**  $\delta$  201.6, 175.7, 157.7, 138.1, 137.1, 133.3, 130.6, 130.5, 130.0, 129.3 (2C), 128.6 (2C), 128.3 (2C), 128.1, 127.6 (2C), 126.3 (2C), 119.6 (2C), 117.1, 63.1, 57.5, 55.6, 45.7, 38.2. The ee was determined by **HPLC** analysis using Chiralpak AY-H column (heptane/*i*PrOH = 98:2, flow rate 0.5 mL/min,  $\lambda = 254$  nm):  $t_S = 34.7$ ,  $t_R = 25.2$ .  $[\alpha]^{21}_D = +8.0^\circ$  ( $c = 0.6$ ,  $CHCl_3$ ).



### 3-(*tert*-butyl)-6-ethyl-4-oxo-1-phenyl-8-vinyl-2,3-diazaspiro[4.4]non-1-ene-7-carbaldehyde, 3r

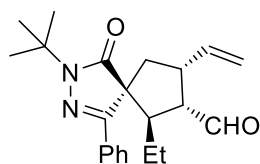

Transparent oil, yield 54%, dr 20:1, ee = 93%.  $^1\text{H}$  NMR (600 MHz,  $\text{CDCl}_3$ )  $\delta$  9.84 (d,  $J$  = 2.0 Hz, 1H), 7.91 – 7.82 (m, 2H), 7.45–7.41 (m, 3H), 5.75 (dt,  $J_1$  = 16.9,  $J_2$  = 9.4 Hz, 1H), 5.21 (dt,  $J$  = 16.9,  $J_2$  = 1.2 Hz, 2H), 5.14 – 5.06 (m, 1H), 4.08 (qd,  $J_1$  = 10.5,  $J_2$  = 7.4 Hz, 1H), 3.39 (ddd,  $J_1$  = 10.8,  $J_2$  = 8.3,  $J_3$  = 2.0 Hz, 1H), 3.26 (td,  $J_1$  = 8.2,  $J_2$  = 6.4 Hz, 1H), 2.26 (dd,  $J_1$  = 13.4,  $J_2$  = 10.7 Hz, 1H), 2.09 (dd,  $J_1$  = 13.3,  $J_2$  = 7.1 Hz, 1H), 1.57 (s, 9H), 1.46 – 1.31 (m, 2H), 0.68 (t,  $J$  = 7.5 Hz, 3H).  $^{13}\text{C}$  NMR (151 MHz,  $\text{CDCl}_3$ )  $\delta$  204.0, 177.3, 156.3, 137.4, 131.0, 129.7, 129.0 (2C), 126.5 (2C), 117.3, 62.7, 58.6, 58.0, 47.2, 43.4, 40.3, 28.4 (3C), 23.7, 12.7. HRMS (ESI)  $m/z$  calcd for  $\text{C}_{22}\text{H}_{29}\text{N}_2\text{O}_2$   $[\text{M}+\text{H}]^+$  = 353.2224; found = 353.2228. The ee was determined by HPLC analysis using Chiralpak IC column (80/20 heptane/*i*-PrOH, flow rate 1.0 ml/min;  $\lambda$  = 190 nm,  $t_s$  = 4.0 min.,  $t_R$  = 4.8 min).  $[\alpha]_D^{25} = +33.3^\circ$  ( $c$  = 0.3,  $\text{CHCl}_3$ ).

### 3-(*tert*-butyl)-4-oxo-1,6-diphenyl-8-vinyl-2,3-diazaspiro[4.4]non-1-ene-7-carbaldehyde, 3s

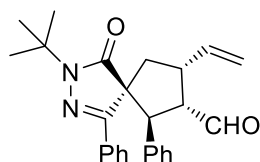

Transparent oil, yield 63%, dr = 5:2, ee = 99% major dia/95% minor dia. Major dia:  $^1\text{H}$  NMR (600 MHz,  $\text{CDCl}_3$ )  $\delta$  9.80 (d,  $J$  = 1.5 Hz, 1H), 7.93 – 7.87 (m, 2H), 7.54 – 7.43 (m, 3H), 7.17 – 7.14 (m, 3H), 7.07 – 7.02 (m, 2H), 5.91 (dt,  $J_1$  = 16.8,  $J_2$  = 9.8 Hz, 1H), 5.29 (dd,  $J_1$  = 16.8,  $J_2$  = 1.0 Hz, 1H), 5.17 (d,  $J$  = 10.2 Hz, 1H), 4.46 – 4.41 (m, 1H), 4.41 – 4.36 (m, 1H), 4.17 – 4.09 (m, 1H), 2.46 – 2.37 (m, 2H), 1.19 (s, 9H).  $^{13}\text{C}$  NMR (151 MHz,  $\text{CDCl}_3$ )  $\delta$  202.7, 177.0, 154.7, 138.2, 135.5, 131.6, 130.0, 129.3 (2C), 128.5 (2C), 128.20 (2C), 127.8, 126.6 (2C), 117.7, 64.4, 57.6, 55.7, 51.3, 43.5, 39.2, 28.2 (3C). HRMS (ESI)  $m/z$  calcd for  $\text{C}_{26}\text{H}_{29}\text{N}_2\text{O}_2$   $[\text{M}+\text{H}]^+$  = 401.2224; found = 401.2221. The ee was determined by HPLC analysis using Chiralpak IC column (98/2 heptane/*i*-PrOH, flow rate 0.5 ml/min;  $\lambda$  = 190 nm, major dia:  $t_s$  = 16.2 min.,  $t_R$  = 23.9 min. Minor dia:  $t_s$  = 15.1 min.,  $t_R$  = 18.0 min).  $[\alpha]_D^{25} = -18.4^\circ$  ( $c$  = 0.49,  $\text{CHCl}_3$ ).

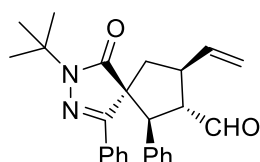

Minor dia:  $^1\text{H}$  NMR (600 MHz,  $\text{CDCl}_3$ )  $\delta$  9.80 (d,  $J$  = 1.5 Hz, 1H), 7.93 – 7.87 (m, 2H), 7.54 – 7.43 (m, 3H), 7.17 – 7.14 (m, 3H), 7.07 – 7.02 (m, 2H), 5.91 (dt,  $J_1$  = 16.8,  $J_2$  = 9.8 Hz, 1H), 5.29 (dd,  $J_1$  = 16.8,  $J_2$  = 1.0 Hz, 1H), 5.17 (d,  $J$  = 10.2 Hz, 1H), 4.46 – 4.41 (m, 1H), 4.41 – 4.36 (m, 1H), 4.17 – 4.09 (m, 1H), 2.46 – 2.37 (m, 2H), 1.19 (s, 9H).  $^{13}\text{C}$  NMR (151 MHz,  $\text{CDCl}_3$ )  $\delta$  202.7, 177.0, 154.7, 138.2, 135.5, 131.6, 130.0, 129.3 (2C), 128.5 (2C), 128.20 (2C), 127.8, 126.6 (2C), 117.7, 64.4, 57.6, 55.7, 51.3, 43.5, 39.2, 28.2 (3C).

### 6-ethyl-4-oxo-1-phenyl-3-(*p*-tolyl)-8-vinyl-2,3-diazaspiro[4.4]non-1-ene-7-carbaldehyde, 3t

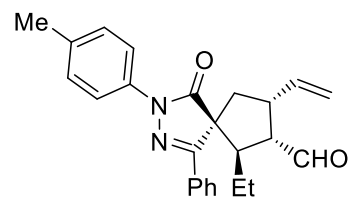

Transparent oil, yield 49%, dr 20:1, ee = 98%.  $^1\text{H}$  NMR (600 MHz,  $\text{CDCl}_3$ )  $\delta$  9.87 (d,  $J$  = 1.8 Hz, 1H), 8.00 – 7.97 (m, 2H), 7.87 (d,  $J$  = 8.5 Hz, 2H), 7.54 – 7.47 (m, 3H), 7.24 (d,  $J$  = 8.3 Hz, 2H), 5.78 (dt,  $J_1$  = 16.9,  $J_2$  = 9.6 Hz, 1H), 5.25 (d,  $J$  = 16.8 Hz, 1H), 5.14 (d,  $J$  = 10.2 Hz, 1H), 4.16 (qd,  $J_1$  = 10.6,  $J_2$  = 7.3 Hz, 1H), 3.46 (ddd,  $J_1$  = 10.8,  $J_2$  = 8.2,  $J_3$  = 1.9 Hz, 1H), 3.43 – 3.37 (m, 1H), 2.37 (d,  $J$  = 3.5 Hz, 4H), 2.23 (dd,  $J_1$  = 13.4,  $J_2$  = 7.0 Hz, 1H), 1.48 – 1.36 (m, 2H), 0.69 (t,  $J$  = 7.5 Hz, 3H).  $^{13}\text{C}$  NMR (151 MHz,  $\text{CDCl}_3$ )  $\delta$  203.7, 175.4, 158.9, 137.0, 135.7, 135.3, 130.5, 129.6 (2C), 129.1 (2C), 127.0 (2C), 119.3 (2C), 117.6, 63.1, 58.6, 47.5, 43.6, 40.7, 23.9, 21.1, 12.8. HRMS (ESI)  $m/z$  calcd for  $\text{C}_{25}\text{H}_{27}\text{N}_2\text{O}_2$   $[\text{M}+\text{H}]^+$  = 387.2067; found =

387.2069. The ee was determined by **HPLC** analysis using Chiralpak IC column (90/10 heptane/*i*-PrOH, flow rate 1.0 ml/min;  $\lambda$  = 190 nm,  $t_s$  = 5.1 min.,  $t_R$  = 5.8 min).  $[\alpha]^{25}_D$  = +36.5° ( $c$  = 0.3, CHCl<sub>3</sub>).

**(5*R*,6*R*,7*S*,8*R*)-6-butyl-4-oxo-1-phenyl-3-(*p*-tolyl)-8-vinyl-2,3-diazaspiro[4.4]non-1-ene-7-carbaldehyde, 3u**

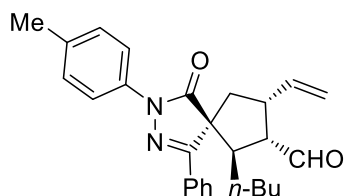

Transparent oil, yield 80%, dr 20:1, ee = 98%. **<sup>1</sup>H NMR (600 MHz, CDCl<sub>3</sub>)**  $\delta$  9.87 (s, 1H), 8.01 – 7.97 (m, 2H), 7.87 (d,  $J$  = 8.4 Hz, 2H), 7.50 (q,  $J_1$  = 7.7,  $J_2$  = 7.0 Hz, 3H), 7.25 (d,  $J$  = 8.4 Hz, 2H), 5.78 (dt,  $J_1$  = 16.9,  $J_2$  = 9.6 Hz, 1H), 5.24 (d,  $J$  = 16.9 Hz, 1H), 5.14 (d,  $J$  = 10.1 Hz, 1H), 4.17 (qd,  $J_1$  = 10.1,  $J_2$  = 6.7 Hz, 1H), 3.46 (dt,  $J_1$  = 8.6,  $J_2$  = 4.9 Hz, 2H), 2.49 – 2.33 (m, 4H), 2.22 (dd,  $J_1$  = 13.4,  $J_2$  = 7.0 Hz, 1H), 1.36 (dddd,  $J_1$  = 29.1,  $J_2$  = 19.4,  $J_3$  = 12.4,  $J_4$  = 5.8 Hz, 2H), 1.13 – 1.06 (m, 2H), 1.01 (dtd,  $J_1$  = 18.4,  $J_2$  = 7.9,  $J_3$  = 6.8,  $J_4$  = 4.4 Hz, 2H), 0.69 (t,  $J$  = 7.3 Hz, 3H). **<sup>13</sup>C NMR (151 MHz, CDCl<sub>3</sub>)**  $\delta$  203.7, 175.4, 158.8, 137.0, 135.6, 135.3, 130.4, 130.0 (2C), 129.1 (2C), 126.9 (2C), 119.3 (2C), 117.6, 63.2, 58.9, 45.7, 43.6, 40.6, 30.6, 30.3, 22.7, 21.1, 13.9. **HRMS** (ESI)  $m/z$  calcd for C<sub>27</sub>H<sub>31</sub>N<sub>2</sub>O<sub>2</sub> [M+H]<sup>+</sup> = 415.2380; found = 415.2373. The ee was determined by **HPLC** analysis using Chiralpak ODH column (99/1 heptane/*i*-PrOH, flow rate 0.5 ml/min;  $\lambda$  = 323 nm,  $t_R$  = 14.7 min.,  $t_s$  = 16.6 min).  $[\alpha]^{25}_D$  = +38.8° ( $c$  = 1.0, CHCl<sub>3</sub>).

**3-(2,4-dinitrophenyl)-6-ethyl-4-oxo-1-phenyl-8-vinyl-2,3-diazaspiro[4.4]non-1-ene-7-carbaldehyde, 3v**

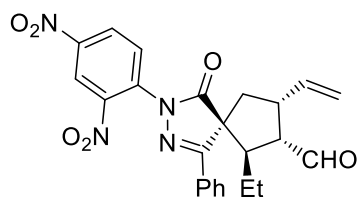

Transparent oil, yield 52%, dr 20:1, ee = 98%. **<sup>1</sup>H NMR (600 MHz, CDCl<sub>3</sub>)**  $\delta$  9.86 (s, 1H), 8.79 (d,  $J$  = 2.6 Hz, 1H), 8.52 (dd,  $J_1$  = 9.0,  $J_2$  = 2.6 Hz, 1H), 8.11 (d,  $J$  = 9.0 Hz, 1H), 7.96 (dd,  $J_1$  = 6.8,  $J_2$  = 3.0 Hz, 2H), 7.53 (dd,  $J_1$  = 5.1,  $J_2$  = 2.0 Hz, 3H), 5.75 (dt,  $J_1$  = 16.9,  $J_2$  = 9.6 Hz, 1H), 5.25 (d,  $J$  = 16.9 Hz, 1H), 5.16 (d,  $J$  = 10.1 Hz, 1H), 4.13 – 3.97 (m, 1H), 3.49 (q,  $J$  = 7.6 Hz, 1H), 3.45 – 3.37 (m, 1H), 2.40 (dd,  $J_1$  = 13.6,  $J_2$  = 11.0 Hz, 1H), 2.23 (dd,  $J_1$  = 13.5,  $J_2$  = 7.0 Hz, 1H), 1.44 (p,  $J$  = 7.4 Hz, 2H), 0.72 (t,  $J$  = 7.4 Hz, 3H). **<sup>13</sup>C NMR (151 MHz, CDCl<sub>3</sub>)**  $\delta$  203.2, 175.1, 162.1, 144.8, 142.1, 136.2, 134.3, 131.5, 129.4 (2C), 129.4, 127.7, 127.2 (2C), 125.1, 121.4, 118.2, 62.5, 58.5, 47.6, 43.4, 40.9, 23.9, 12.8. **HRMS** (ESI)  $m/z$  calcd for C<sub>24</sub>H<sub>23</sub>N<sub>4</sub>O<sub>6</sub> [M+H]<sup>+</sup> = 463.1612; found = 463.1614. The ee was determined by **HPLC** analysis using Chiralpak IA column (95/5 heptane/*i*-PrOH, flow rate 1.0 ml/min;  $\lambda$  = 190 nm,  $t_s$  = 28.1 min.,  $t_R$  = 30.9 min).  $[\alpha]^{25}_D$  = +30.0° ( $c$  = 0.1, CHCl<sub>3</sub>).

**6-butyl-3-(2,4-dinitrophenyl)-4-oxo-1-phenyl-8-vinyl-2,3-diazaspiro[4.4]non-1-ene-7-carbaldehyde, 3w**

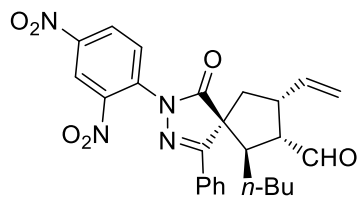

Transparent oil, yield 61%, dr 20:1, ee = 98%. **<sup>1</sup>H NMR (600 MHz, CDCl<sub>3</sub>)**  $\delta$  9.85 (d,  $J$  = 1.6 Hz, 1H), 8.80 (d,  $J$  = 2.5 Hz, 1H), 8.52 (dd,  $J_1$  = 9.0,  $J_2$  = 2.5 Hz, 1H), 8.11 (d,  $J$  = 9.0 Hz, 1H), 8.02 – 7.92 (m, 2H), 7.54 (dd,  $J_1$  = 5.1,  $J_2$  = 2.0 Hz, 3H), 5.75 (ddd,  $J_1$  = 16.9,  $J_2$  = 10.1,  $J_3$  = 9.0 Hz, 1H), 5.25 (dt,  $J_1$  = 16.9,  $J_2$  = 1.2 Hz, 1H), 5.16 (dt,  $J$  = 10.3,  $J_2$  = 1.0 Hz, 1H), 4.12 – 4.02 (m, 1H), 3.55 (td,  $J_1$  = 8.0,  $J_2$  = 6.8 Hz, 1H), 3.42 (ddd,  $J_1$  = 11.2,  $J_2$  = 8.0,  $J_3$  = 1.7 Hz, 1H), 2.40 (dd,  $J_1$  = 13.5,  $J_2$  = 11.1 Hz, 1H), 2.23 (dd,  $J_1$  = 13.5,  $J_2$  = 6.9 Hz, 1H), 1.45 – 1.32 (m, 2H), 1.19 – 1.08 (m, 2H), 1.06 – 0.98 (m, 2H), 0.72 (t,  $J$  = 7.3 Hz, 3H). **<sup>13</sup>C NMR (151 MHz, CDCl<sub>3</sub>)**  $\delta$  203.2, 175.2, 162.0, 144.8, 142.1, 136.2, 134.3, 131.5, 129.4 (2C), 129.4, 127.2

(2C), 125.1, 121.4, 118.2, 62.7, 58.7, 45.9, 43.5, 40.8, 30.5, 30.4, 22.6, 13.8. **HRMS** (ESI)  $m/z$  calcd for  $C_{26}H_{27}N_2O_2$   $[M+H]^+ = 491.1925$ ; found = 491.1927. The ee was determined by **HPLC** analysis using Chiralpak IA column (80/20 heptane/*i*-PrOH, flow rate 1.0 ml/min;  $\lambda = 190$  nm,  $t_R = 10.9$  min.,  $t_S = 12.9$  min).  $[\alpha]^{25}_D = +47.9^\circ$  ( $c = 1.1$ ,  $CHCl_3$ ).

**6-(4-bromophenyl)-4-oxo-1,3-diphenyl-8-vinyl-2,3-diazaspiro[4.4]non-1-ene-7-carbaldehyde, 3x**

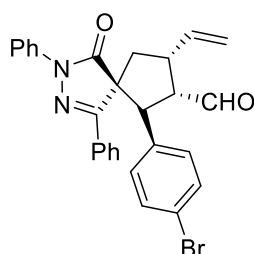

Yellowish solid, yield 85 %, m.p. = 62,5 °C, dr = 1.4:1, ee = 99/77 %; **major dia:**  $^1H$  NMR (600 MHz,  $CDCl_3$ )  $\delta$  9.80 (d,  $J = 1.3$  Hz, 1H), 8.01 – 7.93 (m, 2H), 7.65 – 7.61 (m, 2H), 7.59 – 7.52 (m, 3H), 7.35 (dd,  $J_1 = 8.7$ ,  $J_2 = 7.4$  Hz, 2H), 7.25 (d,  $J = 8.5$  Hz, 2H), 7.20 – 7.17 (m, 1H), 6.94 (d,  $J = 8.5$  Hz, 2H), 5.89 (dt,  $J_1 = 16.8$ ,  $J_2 = 9.8$  Hz, 1H), 5.39–5.16 (m, 2H), 4.48 (d,  $J = 10.7$  Hz, 1H), 4.39 (td,  $J_1 = 10.6$ ,  $J_2 = 1.3$  Hz, 1H), 4.27–4.18 (m, 1H), 2.54 (qd,  $J_1 = 14.0$ ,  $J_2 = 8.0$  Hz, 2H)

ppm;  $^{13}C$  NMR (151 MHz,  $CDCl_3$ )  $\delta$  201.8, 175.1, 157.3, 137.5, 137.4, 134.4, 131.7 (2C), 130.8, 130.6, 129.6 (2C), 129.4, 128.9 (2C), 126.8 (2C), 125.8, 122.1, 119.7 (2C), 118.1, 64.6, 56.2, 51.1, 43.2, 39.8 ppm. IR (KBr):  $\nu = 3479, 3408, 3067, 2932, 2729, 1697, cm^{-1}$ ; **HRMS** (ESI)  $m/z$  calcd for  $[M+Na]^+ = 521.0835$ ; found = 521.0830. The ee was determined by HPLC analysis using Chiralpak IA column (80/20 heptane/*i*-PrOH, flow rate 1.0 ml/min;  $\lambda = 190$  nm, **minor dia:**  $t_{major} = 5.8$  min.,  $t_{minor} = 10.9$  min, **major dia:**  $t_{major} = 7.1$  min.,  $t_{minor} = 10.0$  min);  $[\alpha]^{25}_D = +23.3^\circ$  ( $c = 0.37$ ,  $CHCl_3$ ).

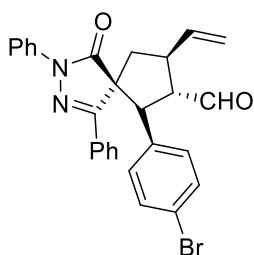

**minor dia:**  $^1H$  NMR (600 MHz,  $CDCl_3$ )  $\delta$  9.70 (d,  $J = 2.4$  Hz, 1H), 8.05 – 7.92 (m, 2H), 7.57 – 7.53 (m, 3H), 7.52 – 7.49 (m, 2H), 7.34 – 7.30 (m, 2H), 7.27 (d,  $J = 8.5$  Hz, 2H), 7.17 – 7.14 (m, 1H), 6.92 (d,  $J = 8.5$  Hz, 2H), 6.10 (ddd,  $J_1 = 16.9$ ,  $J_2 = 10.1$ ,  $J_3 = 8.1$  Hz, 1H), 5.37 – 5.19 (m, 2H), 4.12 (ddd,  $J_1 = 12.9$ ,  $J_2 = 10.7$ ,  $J_3 = 2.4$  Hz, 1H), 4.05 (d,  $J = 12.4$  Hz, 1H), 3.46–3.37 (m, 1H), 2.88 (dd,  $J_1 = 14.6$ ,  $J_2 = 9.7$  Hz, 1H), 2.40 (dd,  $J_1 = 14.7$ ,  $J_2 = 9.5$  Hz, 1H) ppm,  $^{13}C$  NMR (151 MHz,  $CDCl_3$ )  $\delta$  201.4, 175.7, 157.7, 138.1, 137.2, 132.7, 130.9, 129.9, 129.6 (2C), 129.5 (2C), 128.9 (2C), 126.4 (2C), 125.9, 122.4, 119.8 (2C), 117.6, 63.03, 57.7, 54.9, 46.0, 38.5 ppm.

## 5. Derivatizations

### 5.1. Synthesis of **11**

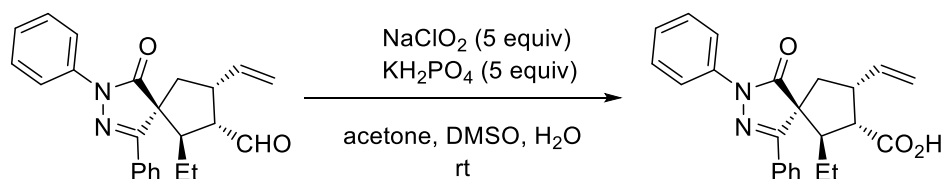

Scheme S3

Spiro compound **3o** (1 equiv, 65 mg, 0.17 mmol) was dissolved in acetone (5 mL) and DMSO (2 mL). To the solution was added dropwise a mixture of NaClO<sub>2</sub> (5 equiv, 77 mg, 0.85 mmol) and KH<sub>2</sub>PO<sub>4</sub> (5 equiv, 0.85 mmol, 116 mg) in water (5 mL). The reaction was stirred at room temperature for 3 hours. The reaction mixture was then evaporated, 10 ml of water were added and was extracted with Et<sub>2</sub>O (3x15 mL). The organic layer was washed with brine and then dried over MgSO<sub>4</sub>. After filtration, the crude was purified on silica gel, obtaining the corresponding acid derivative **11** as white solid (58 mg, yield 88%, 99% ee).

### 6-ethyl-4-oxo-1,3-diphenyl-8-vinyl-2,3-diazaspiro[4.4]non-1-ene-7-carboxylic acid, **11**

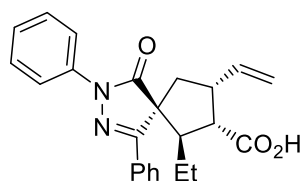

White solid, m.p. = 148.9 °C, yield 88 %, ee 99 %. <sup>1</sup>H NMR (600 MHz, CDCl<sub>3</sub>) δ 8.11 – 8.08 (m, 2H), 8.03 (dq, *J*<sub>1</sub> = 7.1, *J*<sub>2</sub> = 1.2 Hz, 2H), 7.54 – 7.49 (m, 3H), 7.48 – 7.43 (m, 2H), 7.28 – 7.21 (m, 1H), 5.90 (ddd, *J*<sub>1</sub> = 16.8, *J*<sub>2</sub> = 10.1, *J*<sub>3</sub> = 8.6 Hz, 1H), 5.22 (dt, *J*<sub>1</sub> = 17.0, *J*<sub>2</sub> = 1.2 Hz, 1H), 5.17 – 5.12 (m, 1H), 4.03 (qd, *J*<sub>1</sub> = 10.4, *J*<sub>2</sub> = 7.5 Hz, 1H), 3.41 (dd, *J*<sub>1</sub> = 10.7, *J*<sub>2</sub> = 8.4 Hz, 1H), 3.32 (td, *J*<sub>1</sub> = 8.6, *J*<sub>2</sub> = 6.0 Hz, 1H), 2.62 (dd, *J*<sub>1</sub> = 13.4, *J*<sub>2</sub> = 10.7 Hz, 1H), 2.29 (dd, *J*<sub>1</sub> = 13.4, *J*<sub>2</sub> = 7.1 Hz, 1H), 1.61 – 1.50 (m, 1H), 1.49 – 1.40 (m, 2H) 0.80 (t, *J* = 7.4 Hz, 3H) ppm. <sup>13</sup>C NMR (151 MHz, CDCl<sub>3</sub>) δ 180.5, 175.7, 158.7, 138.0, 136.8, 130.5, 130.3, 129.1 (2C), 129.0 (2C), 126.9 (2C), 125.5, 119.2 (2C), 117.8, 63.6, 52.7, 51.8, 43.6, 40.6, 24.0, 12.5 ppm. HRMS (ESI) *m/z* calcd for C<sub>24</sub>H<sub>25</sub>N<sub>2</sub>O<sub>3</sub> [M+H]<sup>+</sup> = 389.1860; found = 389.1857. The ee was determined by HPLC analysis using Chiralpak IA (70/30 heptane/*i*-PrOH, flow rate 0.2 ml/min; 35 °C, λ = 254 nm, *t*<sub>s</sub> = 30.5 min., *t*<sub>R</sub> = 41.0 min.). [α]<sub>D</sub><sup>25</sup> = +90.9° (*c* = 0.4, CHCl<sub>3</sub>).

### 5.2. Synthesis of **12**

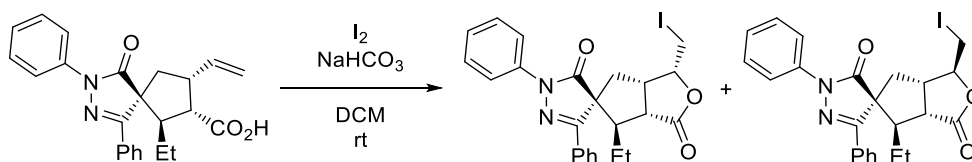

Scheme S4

Following the published procedure,<sup>5</sup> a saturated water solution of NaHCO<sub>3</sub> (1 mL) and I<sub>2</sub> (1.1 equiv, 0.09 mmol, 11 mg) was added to the solution of acid **11** (1 equiv, 0.08 mmol, 30 mg) in DCM (1 mL) under vigorous stirring at room temperature. After full conversion (TLC monitoring) was added to the reaction mixture a sat. water solution of Na<sub>2</sub>SO<sub>3</sub>/NaHCO<sub>3</sub> (1:1, 3 mL). The organic layer was

<sup>5</sup> Kurth, M. J., Brown, E. G. *J. Am. Chem. Soc.* **1987**, *109*, 6844-6845.

separated, washed with brine, dried over  $\text{MgSO}_4$ , filtered and concentrated *in vacuo*. The crude was purified on silica gel, leading to the isolation of both diastereomers of the corresponding lactone derivative in an overall yield of 81% (dr = 1:1).

#### 4-ethyl-1-(iodomethyl)-1',3'-diphenyl-3a,4,6a-tetrahydro-1H,3H-spiro[cyclopenta[c]furan-5,4'-pyrazole]-3,5'(1'H)-dione, **12**

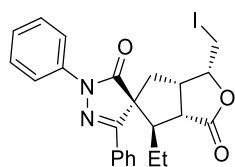

Dia 1: Transparent oil, yield 37%; ee 99%.  $^1\text{H}$  NMR (600 MHz,  $\text{CDCl}_3$ )  $\delta$  8.01 – 7.95 (m, 2H), 7.83 – 7.77 (m, 2H), 7.52 – 7.40 (m, 5H), 7.27 – 7.22 (m, 1H), 4.86 (dt,  $J_1 = 9.7$ ,  $J_2 = 5.8$  Hz, 1H), 4.20 (qd,  $J_1 = 9.3$ ,  $J_2 = 5.7$  Hz, 1H), 3.46 (dd,  $J_1 = 10.2$ ,  $J_2 = 5.8$  Hz, 1H), 3.24 (dd,  $J_1 = 9.0$ ,  $J_2 = 5.0$  Hz, 1H), 3.13 – 3.06 (m, 2H), 2.35 (d,  $J_1 = 9.5$  Hz, 2H), 1.69 (ddt,  $J_1 = 13.3$ ,  $J_2 = 9.2$ ,  $J_3 = 7.3$  Hz, 1H), 1.59 – 1.47 (m, 1H), 0.91 (t,  $J_1 = 7.4$  Hz, 3H) ppm.  $^{13}\text{C}$  NMR (151 MHz,  $\text{CDCl}_3$ )  $\delta$  178.8, 174.7, 157.7, 137.8, 130.8, 129.9, 129.4 (2C), 129.1 (2C), 126.6 (2C), 125.8, 119.3 (2C), 79.0, 64.1, 52.3, 51.4, 42.7, 33.8, 25.0, 12.7, -0.8 ppm. HRMS (ESI)  $m/z$  calcd for  $\text{C}_{24}\text{H}_{24}\text{IN}_2\text{O}_3$   $[\text{M}+\text{H}]^+ = 515.0826$ ; found = 515.0829. The ee was determined by HPLC analysis using Chiralpak IC (80/20 heptane/*i*-PrOH, flow rate 1.0 ml/min;  $\lambda = 254$  nm,  $t_{\text{major}} = 8.2$  min.,  $t_{\text{minor}} = 9.2$  min.).  $[\alpha]_D^{25} = +1.3^\circ$  ( $c = 0.2$ ,  $\text{CHCl}_3$ ).

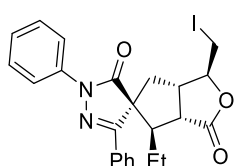

Dia 2: Transparent oil, yield 44%, ee 98%.  $^1\text{H}$  NMR (600 MHz,  $\text{CDCl}_3$ )  $\delta$  7.98 (d,  $J = 7.8$  Hz, 2H), 7.80 (dd,  $J_1 = 7.4$ ,  $J_2 = 2.1$  Hz, 2H), 7.53 – 7.42 (m, 5H), 7.27 – 7.22 (m, 1H), 4.43 (ddd,  $J_1 = 6.6$ ,  $J_2 = 3.9$ ,  $J_3 = 2.4$  Hz, 1H), 3.76 – 3.68 (m, 1H), 3.49 – 3.41 (m, 2H), 3.33 (dd,  $J_1 = 10.5$ ,  $J_2 = 7.3$  Hz, 1H), 2.97 (dd,  $J_1 = 14.6$ ,  $J_2 = 7.5$  Hz, 1H), 2.54 (dd,  $J_1 = 13.4$ ,  $J_2 = 8.1$  Hz, 1H), 2.44 (dd,  $J_1 = 13.4$ ,  $J_2 = 10.3$  Hz, 1H), 1.81 – 1.70 (m, 1H), 1.59 – 1.49 (m, 1H), 0.91 (t,  $J = 7.5$  Hz, 3H) ppm.  $^{13}\text{C}$  NMR (151 MHz,  $\text{CDCl}_3$ )  $\delta$  178.2, 174.8, 157.6, 137.8, 130.8, 130.1, 129.3 (2C), 129.1 (2C), 126.7 (2C), 125.8, 119.2, 82.7, 65.1, 52.1, 50.0, 45.1, 40.6, 24.7, 12.6, 8.0 ppm. HRMS (ESI)  $m/z$  calcd for  $\text{C}_{24}\text{H}_{24}\text{IN}_2\text{O}_3$   $[\text{M}+\text{H}]^+ = 515.0826$ ; found = 515.0823. The ee was determined by HPLC analysis using Chiralpak IA (80/20 heptane/*i*-PrOH, flow rate 1.0 ml/min;  $\lambda = 254$  nm,  $t_{\text{minor}} = 8.6$  min.,  $t_{\text{major}} = 15.8$  min.).  $[\alpha]_D^{25} = +20.7^\circ$  ( $c = 0.8$ ,  $\text{CHCl}_3$ ).

#### 5.3. Synthesis of **13**

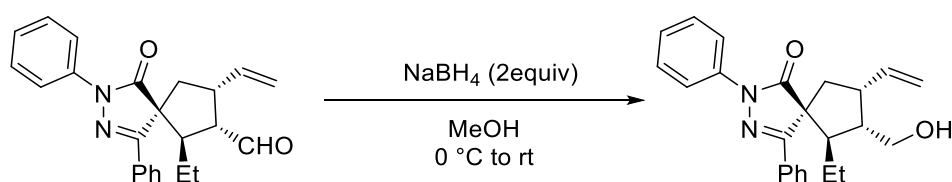

Scheme S5

To the solution of spiro compound **3o** (1 equiv, 0.16 mmol, 58 mg) in MeOH (5 mL) was slowly added  $\text{NaBH}_4$  (2 equiv, 0.32 mmol, 12 mg) at  $0^\circ\text{C}$ . Reaction mixture was stirred until full conversion (TLC monitoring) and then was to the reaction mixture added cooled mixture of EtOAc/1 M HCl (1:1, 10 mL). Organic layer was separated, washed with brine and dried over  $\text{MgSO}_4$ . After filtration and evaporation to dryness was the crude separated on silica obtaining compound **xx** as transparent oil (48 mg, 83%).

### 6-ethyl-7-(hydroxymethyl)-2,4-diphenyl-8-vinyl-2,3-diazaspiro[4.4]non-3-en-1-one, **13**

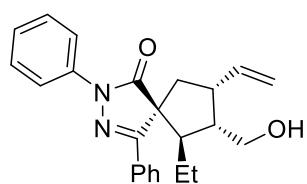

Transparent oil, yield 83%; ee 99%.  $^1\text{H}$  NMR (600 MHz,  $\text{CDCl}_3$ )  $\delta$  8.10 – 8.07 (m, 2H), 8.05 – 8.02 (m, 2H), 7.50 – 7.41 (m, 5H), 7.25 – 7.19 (m, 1H), 6.15 (ddd,  $J_1 = 17.2$ ,  $J_2 = 10.3$ ,  $J_3 = 8.1$  Hz, 1H), 5.24 – 5.15 (m, 2H), 3.89 (dd,  $J_1 = 11.1$ ,  $J_2 = 3.2$  Hz, 1H), 3.86 – 3.79 (m, 1H), 3.72 (dd,  $J_1 = 11.1$ ,  $J_2 = 4.9$  Hz, 1H), 2.89 (q,  $J = 7.6$  Hz, 1H), 2.59 – 2.44 (m, 2H), 2.18 (dd,  $J_1 = 13.1$ ,  $J_2 = 7.1$  Hz, 1H), 1.63 – 1.46 (m, 2H), 0.75 (t,  $J = 7.5$  Hz, 3H) ppm.  $^{13}\text{C}$  NMR (151 MHz,  $\text{CDCl}_3$ )  $\delta$  175.9, 160.0, 139.2, 138.1, 130.6, 130.1, 128.8 (2C), 128.7 (2C), 126.9 (2C), 125.1, 119.0 (2C), 116.4, 63.0, 63.0, 49.6, 48.8, 42.6, 40.7, 24.2, 12.5 ppm. HRMS (ESI)  $m/z$  calcd for  $\text{C}_{24}\text{H}_{27}\text{N}_2\text{O}_2$   $[\text{M}+\text{H}]^+ = 375.2067$ ; found = 375.2066. The ee was determined by HPLC analysis using Chiralpak AD (95/5 heptane/*i*-PrOH, flow rate 1.0 ml/min;  $\lambda = 190$  nm,  $t_{\text{minor}} = 13.2$  min.,  $t_{\text{major}} = 15.5$  min.).  $[\alpha]_D^{25} = +94.9^\circ$  ( $c = 1.2$ ,  $\text{CHCl}_3$ ).

#### 5.4. Synthesis of **14**

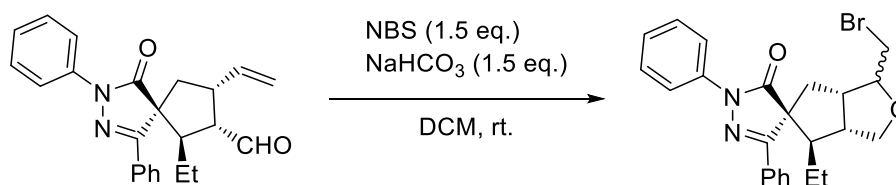

Scheme S6

According published procedure,<sup>6</sup> in a flask charged with homoallylic alcohol (1 eq., 0.08 mmol, 29 mg) and DCM (2 mL) at 0 °C, was added *N*-bromosuccinimide (1.5 eq., 0.12 mmol, 21 mg) and  $\text{NaHCO}_3$  (1.5 eq., 0.12 mmol, 10 mg). The reaction mixture was allowed to stir at 0 °C and then allowed to reach room temperature. When all the starting material was consumed (TLC monitoring), water was added to the reaction mixture and was then extracted with  $\text{Et}_2\text{O}$  (3 x 10 mL). The organic layer was washed with brine, dried over  $\text{MgSO}_4$ , concentrated and purified on silica. The corresponding product **14** was isolated as a mixture of diastereomers as a transparent oil (32 mg, dr = 2:1, 89 %).

### (1*S*,3*aR*,4*R*,5*R*,6*aS*)-1-(bromomethyl)-4-ethyl-1',3'-diphenyl-3*a*,4,6,6*a*-tetrahydro-1*H*,3*H*-spiro[cyclopenta[*c*]furan-5,4'-pyrazol]-5'(1'*H*)-one, **14**

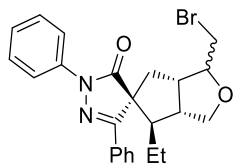

Transparent oil, yield 89%; dr = 2:1, ee 98/99 %. Major dia:  $^1\text{H}$  NMR (600 MHz,  $\text{CDCl}_3$ )  $\delta$  8.03 – 7.97 (m, 2H), 8.03 – 7.97 (m, 2H), 7.50 – 7.46 (m, 3H), 7.47 – 7.40 (m, 2H), 7.25 – 7.19 (m, 1H), 4.16 – 4.09 (m, 2H), 3.80 (dd,  $J_1 = 9.6$ ,  $J_2 = 3.0$  Hz, 1H), 3.46 (dd,  $J_1 = 10.3$ ,  $J_2 = 6.6$  Hz, 1H), 3.41 – 3.35 (m, 1H), 3.36 (dd,  $J_1 = 10.3$ ,  $J_2 = 6.8$  Hz, 1H), 3.17 (tdd,  $J_1 = 9.8$ ,  $J_2 = 6.8$ ,  $J_3 = 3.0$  Hz, 1H), 2.58 (dt,  $J_1 = 9.3$ ,  $J_2 = 7.3$  Hz, 1H), 2.47 (dd,  $J_1 = 13.6$ ,  $J_2 = 8.8$  Hz, 1H), 2.39 (dd,  $J_1 = 13.7$ ,  $J_2 = 8.4$  Hz, 1H), 1.42 (p,  $J = 7.4$  Hz, 2H), 0.79 (t,  $J = 7.6$  Hz, 3H) ppm.  $^{13}\text{C}$  NMR (151 MHz,  $\text{CDCl}_3$ )  $\delta$  176.1, 158.0, 138.5, 130.6, 130.5, 129.1 (2C), 129.0 (2C), 126.8 (2C), 125.4, 119.1 (2C), 85.9, 73.4, 67.1, 55.2, 50.6, 48.6, 39.9, 33.5, 23.5, 12.8 ppm. HRMS (ESI)  $m/z$  calcd for  $\text{C}_{24}\text{H}_{26}\text{BrN}_2\text{O}_2$   $[\text{M}+\text{H}]^+ = 453.1172$ ; found = 453.1174. The ee was determined by HPLC analysis using Chiralpak IC (99/1 heptane/*i*-PrOH, flow rate 1.0

<sup>6</sup> Lee, A S.-Y; Tsao, K.-W.; Chang, Y.-T. ; Chu, S. F. *Tetrahedron Lett.* **2007**, *48*, 6790.

ml/min;  $\lambda$  = 254 nm, **minor dia**:  $t_{\text{minor}}$  = 8.7 min.,  $t_{\text{major}}$  = 9.1 min, **major dia**:  $t_{\text{major}}$  = 10.5 min.,  $t_{\text{minor}}$  = 15.1 min).  $[\alpha]^{25}_{\text{D}}$  = +76.8° ( $c$  = 0.4,  $\text{CHCl}_3$ ).

**Minor dia**:  $^1\text{H NMR}$  (600 MHz,  $\text{CDCl}_3$ )  $\delta$  8.03 – 7.97 (m, 2H), 8.03 – 7.97 (m, 2H), 7.50 – 7.46 (m, 3H), 7.47 – 7.40 (m, 2H), 7.25 – 7.19 (m, 1H), 4.00 (q,  $J$  = 6.9 Hz, 1H), 3.86 (d,  $J$  = 4.2 Hz, 2H), 3.68 – 3.59 (m, 1H), 3.58 (dd,  $J_1$  = 10.5,  $J_2$  = 7.2 Hz, 1H), 3.41 – 3.35 (m, 1H), 3.04 (tt,  $J_1$  = 8.6,  $J_2$  = 4.0 Hz, 1H), 2.52 – 2.46 (m, 1H), 2.38 – 2.31 (m, 1H), 2.14 (dd,  $J_1$  = 13.0,  $J_2$  = 8.1 Hz, 1H), 1.42 (p,  $J$  = 7.4 Hz, 2H), 0.84 – 0.78 (m, 3H) ppm.  $^{13}\text{C NMR}$  (151 MHz,  $\text{CDCl}_3$ )  $\delta$  175.8, 158.2, 138.1, 130.6, 130.5, 129.2 (2C), 129.0 (2C), 126.8 (2C), 125.4, 119.1 (2C), 81.2, 74.6, 65.8, 56.3, 50.3, 45.9, 33.9, 29.4, 23.8, 12.9 ppm.

### 5.5. Synthesis of **16**

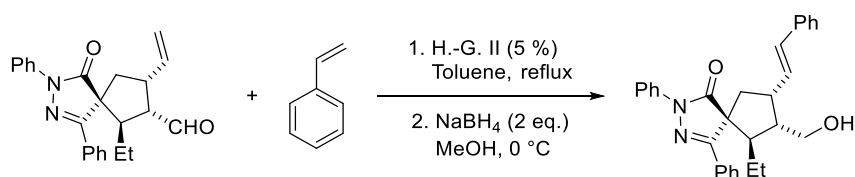

**Scheme S7**

Spiro compound **3o** (1 eq., 0.054 mmol, 20 mg), styrene (1 eq., 0.054 mmol, 6 mg) and H.-G. II catalyst (5%, 0.003 mmol, 1.8 mg) were refluxed in toluene (1 mL) until reaching full conversion (TLC monitoring). The solvent was then removed under vacuum and methanol (1 mL) was added, followed by addition of  $\text{NaBH}_4$  (2 eq., 0.11 mmol, 4 mg) at 0 °C. The reaction mixture was then stirred at room temperature until full conversion (TLC monitoring) and then quenched by adding of 1M  $\text{HCl}/\text{EtOAc}$  (2 mL, 1:1) at 0 °C. The organic layer was separated and dried over  $\text{NaSO}_4$ . After filtration and evaporation the crude material was loaded on silica. Product **16** was isolated as a transparent oil (10 mg, 42% yield).

### (*E*)-6-ethyl-4-oxo-1,3-diphenyl-8-styryl-2,3-diazaspiro[4.4]non-1-ene-7-carbaldehyde, **16**

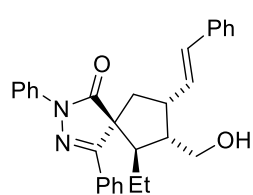

Transparent oil, yield 42%; dr > 20:1; ee 98%. The ee was determined by HPLC analysis using Chiralpak IA (80/20 heptane/*i*-PrOH, flow rate 1.0 ml/min;  $\lambda$  = 190 nm,  $t_{\text{major}}$  = 6.0 min.,  $t_{\text{minor}}$  = 7.0 min);  $^1\text{H NMR}$  (600 MHz,  $\text{CDCl}_3$ )  $\delta$  8.12 – 8.09 (m, 2H), 8.06 – 8.02 (m, 2H), 7.51 – 7.43 (m, 5H), 7.40 – 7.36 (m, 2H), 7.32 (dd,  $J_1$  = 8.4,  $J_2$  = 6.9 Hz, 2H), 7.25 – 7.18 (m, 2H), 6.58 – 6.46 (m, 2H), 3.99 (tt,  $J_1$  = 10.4,  $J_2$  = 7.5 Hz, 1H), 3.93 (dd,  $J_1$  = 10.9,  $J_2$  = 3.1 Hz, 1H), 3.77 (dd,  $J_1$  = 10.9,  $J_2$  = 4.7 Hz, 1H), 2.95 (q,  $J$  = 7.6 Hz, 1H), 2.60 (dd,  $J_1$  = 13.1,  $J_2$  = 10.8 Hz, 1H), 2.53 (ddd,  $J_1$  = 10.8,  $J_2$  = 4.8,  $J_3$  = 2.9 Hz, 1H), 2.25 (dd,  $J_1$  = 13.1,  $J_2$  = 7.1 Hz, 1H), 1.68 – 1.50 (m, 1H), 0.77 (t,  $J$  = 7.5 Hz, 3H) ppm;  $^{13}\text{C NMR}$  (151 MHz,  $\text{CDCl}_3$ )  $\delta$  176.1, 160.3, 138.3, 137.4, 131.8, 130.9, 130.6, 130.3, 129.0 (2C), 129.0 (2C), 128.8 (2C), 127.5, 127.2 (2C), 126.4 (2C), 125.3, 119.3 (3C), 63.4, 63.3, 49.7, 49.6, 42.7, 41.7, 24.5, 12.7 ppm;  $[\alpha]^{25}_{\text{D}}$  = +35.4° ( $c$  = 0.24,  $\text{CHCl}_3$ ); IR (KBr):  $\nu$  = 3551, 3485, 3428, 3411, 2962, 2872, 1706, 1497, 1317  $\text{cm}^{-1}$ ; HRMS (ESI)  $m/z$  calcd for  $\text{C}_{30}\text{H}_{30}\text{N}_2\text{O}_2$   $[\text{M}+\text{Na}]^+$  = 473.2199; found = 473.2198.

## 5.6. Synthesis of **17**

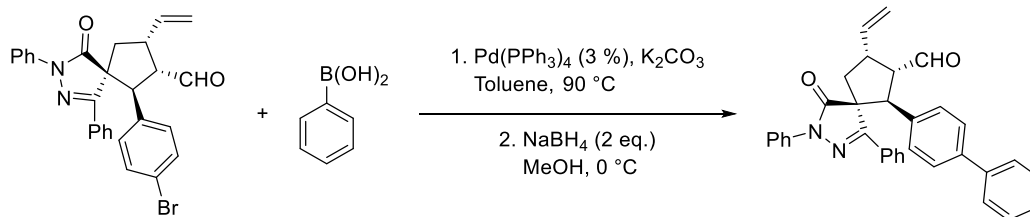

**Scheme S8**

According to a published procedure,<sup>7</sup> to the suspension of spiro compound **3w** (1 eq., 0.05 mmol, 25 mg), phenylboronic acid (2 eq., 0.1 mmol, 12 mg) and  $\text{K}_2\text{CO}_3$  (2 eq., 0.1 mmol, 14 mg) in dry toluene (1 mL) was added  $\text{Pd(PPh}_3)_4$  (3 %, 0.0015 mmol, 1.8 mg) under argon atmosphere. The reaction mixture was then heated at 90 °C until full conversion (TLC monitoring), then the solvent was removed by vacuum and methanol (1 mL) was added followed by addition of  $\text{NaBH}_4$  (2 eq., 0.1 mmol, 3.8 mg) at 0 °C. The reaction mixture was then stirred at room temperature until full conversion (TLC monitoring) and then quenched by adding of 1M  $\text{HCl/EtOAc}$  (1 mL, 1:1) at 0 °C. The organic layer was separated and dried over  $\text{NaSO}_4$ . After filtration and evaporation, the crude material was loaded on silica and the corresponding product **17** was isolated as a mixture of diastereomers as a transparent oil (15 mg, 60% yield).

### 6-([1,1'-biphenyl]-4-yl)-7-(hydroxymethyl)-2,4-diphenyl-8-vinyl-2,3-diazaspiro[4.4]non-3-en-1-one, **17**

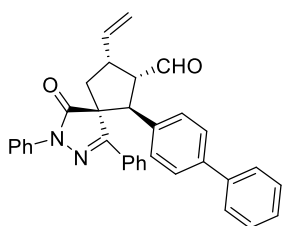

Transparent oil, yield 60%; dr 1.2:1, ee 69/98%.; **major dia:**  $^1\text{H NMR}$  (600 MHz,  $\text{CDCl}_3$ )  $\delta$  7.94-7.00 (m, 19H), 6.28 (dt,  $J_1 = 16.9$ ,  $J_2 = 9.7$  Hz, 1H), 5.37 – 5.11 (m, 2H), 4.02 (d,  $J = 11.4$  Hz, 1H), 3.86 – 3.79 (m, 1H), 3.77 (dd,  $J_1 = 11.5$ ,  $J_2 = 3.6$  Hz, 1H), 3.67–3.63 (m, 1H), 3.60–3.54 (m, 1H), 2.58 (qd,  $J_1 = 14.0$ ,  $J_2 = 7.8$  Hz, 2H) ppm.  $^{13}\text{C NMR}$  (151 MHz,  $\text{CDCl}_3$ )  $\delta$  175.8, 158.1, 139.7, 137.6, 134.7, 130.5-119.9 (22xC), 116.9, 77.2, 65.3, 61.8, 54.4, 46.1, 45.7, 43.5, 39.1 ppm. The ee was determined by HPLC analysis using Chiralpak IA (90/10 heptane/*i*-PrOH, flow rate 1.0 ml/min;  $\lambda = 190$  nm, **major dia:**  $t_{\text{major}} = 7.7$  min.,  $t_{\text{minor}} = 14.9$  min, **minor dia:**  $t_{\text{minor}} = 24.6$  min.,  $t_{\text{minor}} = 40.3$  min)  $[\alpha]_D^{25} = +22.7^\circ$  ( $c = 0.44$ ,  $\text{CHCl}_3$ ); IR (KBr):  $\nu = 3482, 3425, 2932, 2463, 1963, 1712, 1497$   $\text{cm}^{-1}$ ; HRMS (ESI)  $m/z$  calcd for  $\text{C}_{34}\text{H}_{31}\text{N}_2\text{O}_2$   $[\text{M}+\text{H}]^+ = 499.2380$ ; found = 499.2382.

**minor dia:**  $^1\text{H NMR}$  (600 MHz,  $\text{CDCl}_3$ )  $\delta$  7.94-6.95 (m, 19 H), 6.08 (ddd,  $J_1 = 16.7$ ,  $J_1 = 10.0$ ,  $J_1 = 8.6$  Hz, 1H), 5.44 – 5.18 (m, 2H), 3.92 (d,  $J = 12.5$  Hz, 1H), 3.87 – 3.81 (m, 1H), 3.70 – 3.64 (m, 1H), 3.26 (p,  $J = 9.6$  Hz, 1H), 3.12 (ddt,  $J_1 = 14.4$ ,  $J_2 = 11.1$ ,  $J_3 = 3.4$  Hz, 1H), 2.80 (dd,  $J_1 = 14.6$ ,  $J_2 = 9.4$  Hz, 1H), 2.36 (dd,  $J_1 = 14.6$ ,  $J_2 = 9.7$  Hz, 2H) ppm;  $^{13}\text{C NMR}$  (151 MHz,  $\text{CDCl}_3$ )  $\delta$  176.6, 159.0, 140.7, 137.5, 133.8, 130.5-120.0 (22xC), 116.8, 63.4, 60.1, 55.5, 47.9, 45.7, 38.3 ppm

<sup>7</sup> Waddell, T. G.; Carter, A. D.; Miller, T. D. *J. Org. Chem.* **1992**, 57, 381.



## 5.7. Synthesis of **19** and **20**

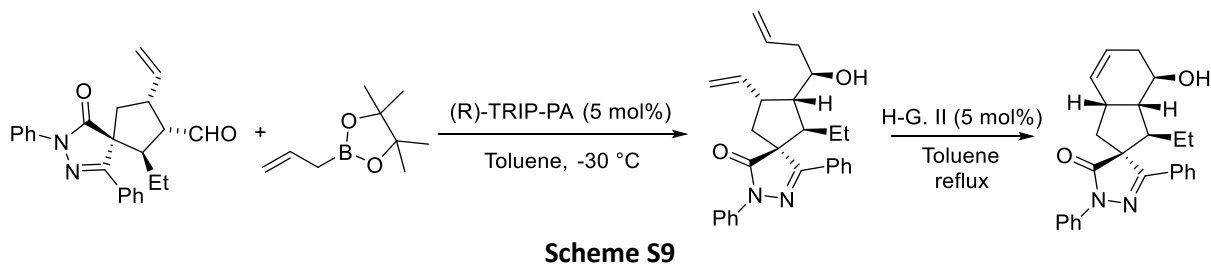

### Allylic alkylation using (*R*)-TRIP-PA catalyst

According to a published procedure,<sup>8</sup> in a schlenk flask which was evacuated, flame dried and filled with argon was added (*R*)-TRIP-PA catalyst (0.005 eq., 0.0054 mmol, 4.1 mg), aldehyde (1eq., 0.108 mmol, 40 mg) and dry toluene (1.5 mL). The reaction mixture was then cooled to -30 °C followed by addition of allylboronic acid pinacol ester (1.2 eq., 0.13 mmol, 22 mg). The reaction mixture was then stirred overnight at the same temperature and then directly loaded on silica. Purification with a flash column chromatography (hexane/EtOAc) led to isolation of corresponding product as a single diastereomer in form of a transparent oil (34 mg, 77%).

### 6-ethyl-7-(1-hydroxybut-3-en-1-yl)-2,4-diphenyl-8-vinyl-2,3-diazaspiro[4.4]non-3-en-1-one, **19**

Transparent oil, yield 77%; dr > 20:1; <sup>1</sup>H NMR (600 MHz, CDCl<sub>3</sub>) δ 8.31 – 8.27 (m, 2H), 8.11 – 7.99 (m, 2H), 7.51 – 7.42 (m, 5H), 7.23 (m, 1H), 6.12 (ddd, *J*<sub>1</sub> = 17.2, *J*<sub>2</sub> = 10.2, *J*<sub>3</sub> = 8.2 Hz, 1H), 5.83 (dddd, *J*<sub>1</sub> = 17.0, *J*<sub>2</sub> = 10.2, *J*<sub>3</sub> = 8.3, *J*<sub>4</sub> = 5.7 Hz, 1H), 5.26 – 5.06 (m, 4H), 4.08 – 3.89 (m, 2H), 3.19 (ddd, *J*<sub>1</sub> = 11.0, *J*<sub>2</sub> = 6.3, *J*<sub>3</sub> = 4.3 Hz, 1H), 2.70 (t, *J* = 12.6 Hz, 1H), 2.29–2.17 (m, 3H), 2.03 (dd, *J*<sub>1</sub> = 12.5, *J*<sub>2</sub> = 6.4 Hz, 1H), 1.94 (bs, 1H), 1.85 (ddq, *J*<sub>1</sub> = 14.6, *J*<sub>2</sub> = 11.3, *J*<sub>3</sub> = 7.3 Hz, 1H), 1.55 (dq, *J*<sub>1</sub> = 15.1, *J*<sub>2</sub> = 7.6, *J*<sub>3</sub> = 4.3 Hz, 1H), 0.62 (t, *J* = 7.5 Hz, 3H) ppm; <sup>13</sup>C NMR (151 MHz, CDCl<sub>3</sub>) δ 176.2, 161.2, 139.3, 138.5, 135.2, 130.6, 130.1, 129.0 (2C), 128.8 (2C), 127.4 (2C), 125.2, 119.3 (2C), 118.8, 116.6, 70.4, 63.0, 52.5, 46.9, 43.8, 42.6, 40.8, 27.0, 12.3 ppm; [α]<sub>D</sub><sup>25</sup> = +72.3° (*c* = 0.92, CHCl<sub>3</sub>); IR (KBr): ν = 3554, 3485, 3073, 2968, 2929, 1703, 1323, 1308 cm<sup>-1</sup>; HRMS (ESI) *m/z* calcd for C<sub>27</sub>H<sub>30</sub>N<sub>2</sub>O<sub>2</sub> [*M*+Na]<sup>+</sup> = 437.2199; found = 437.2199.

### Intramolecular metathesis

To the flask charged with compound **19** (1eq., 0.065 mmol, 27 mg) in dry toluene (2 mL) was added H.-G. II catalyst (5 %, 0.0033 mmol, 2 mg). The reaction mixture was then heated to reflux overnight until full conversion was reached (TLC monitoring). The crude product was then purified with flash column chromatography on silica gel, leading to the isolation of product as a transparent oil as single diastereomer (21 mg, 91%).

<sup>8</sup> Jain, P.; Antilla, J. C. *J. Am. Chem. Soc.* **2010**, *132*, 11884.

**3-ethyl-4-hydroxy-1',3'-diphenyl-1,3,3a,4,5,7a-hexahydrospiro[indene-2,4'-pyrazol]-5'(1'H)-one, 20**

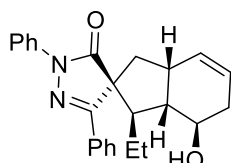

Transparent oil, yield 91%; dr > 20:1;  $^1\text{H}$  NMR (600 MHz,  $\text{CDCl}_3$ )  $\delta$  8.02 (d,  $J$  = 8.1 Hz, 2H), 7.96 (dd,  $J_1$  = 6.6,  $J_2$  = 3.0 Hz, 2H), 7.44 (ddd,  $J_1$  = 7.4,  $J_2$  = 5.6,  $J_3$  = 2.6 Hz, 5H), 7.22 (t,  $J$  = 7.4 Hz, 1H), 5.81 – 5.77 (m, 1H), 5.76 – 5.69 (m, 1H), 3.97 (q,  $J$  = 5.6 Hz, 1H), 3.55 (dq,  $J_1$  = 8.1,  $J_2$  = 2.7 Hz, 1H), 2.68 (td,  $J_1$  = 8.6,  $J_2$  = 5.9 Hz, 1H), 2.56 (q,  $J$  = 8.2 Hz, 1H), 2.46 (dd,  $J_1$  = 13.8,  $J_2$  = 8.3 Hz, 1H), 2.37 – 2.31 (m, 1H), 2.25 (dd,  $J_1$  = 13.8,  $J_2$  = 7.7 Hz, 1H), 2.22 – 2.16 (m, 1H), 1.66 – 1.54 (m, 3H), 0.71 (t,  $J$  = 7.5 Hz, 3H) ppm;  $^{13}\text{C}$  NMR (151 MHz,  $\text{CDCl}_3$ )  $\delta$  176.6, 160.4, 138.3, 130.8, 130.6, 130.3, 129.0, 128.9, 128.9, 126.9, 125.3, 123.0, 119.3, 68.9, 62.6, 52.2, 49.3, 40.8, 37.1, 31.4, 24.3, 12.6 ppm;  $[\alpha]_{25\text{D}}$  = +15.9° ( $c$  = 0.32,  $\text{CHCl}_3$ ); IR (KBr):  $\nu$  = 3548, 3482, 3464, 3022, 2962, 2932, 2875, 1703, 1682, 1601, 1314  $\text{cm}^{-1}$ ; HRMS (ESI)  $m/z$  calcd for  $\text{C}_{25}\text{H}_{26}\text{N}_2\text{O}_2$   $[\text{M}+\text{Na}]^+$  = 409.1886; found = 409.1885.

## 6. Configuration studies

### Compound **3n**

Full assignment of the hydrogen chemical shifts was obtained by 2D COSY experiments, starting from the methyl signal that is coupled with H-2 at 3.20 ppm (carbon numbering as from Figure S1). H-3 was found at 3.44 ppm by correlation with H-2 and with CHO. H-4 was then assigned to the signal at 3.96 ppm by COSY correlation with H-6 and H-3. The two diastereotopic hydrogens H-5a and H-5b were finally assigned by correlation with H4 and from HSQC spectrum. The relative configuration of the four stereogenic carbons was then determined by NOE experiments (Figures A and B).

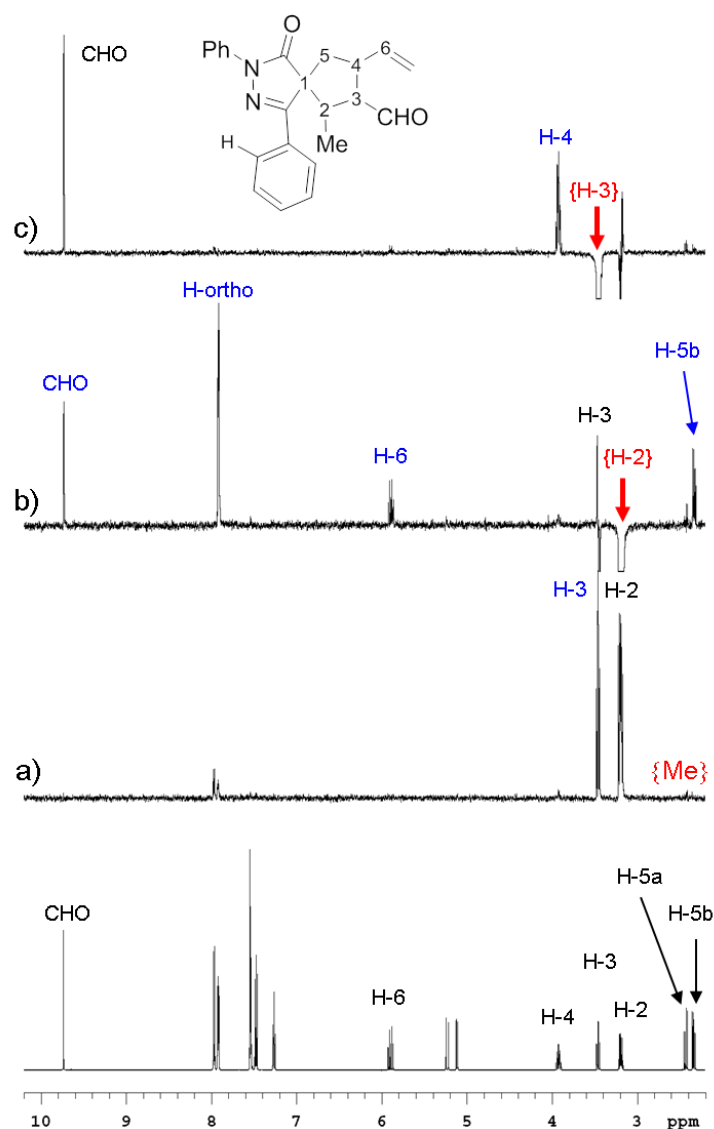

**Figure S1.** DPGSE-NOE spectra of compound **3n** (600 MHz in CD<sub>3</sub>CN)

On saturation of the methyl signal (trace a in Figure S1) a strong NOE is visible on H-3 (the NOE on H-2 is a “control” signal), while only tiny enhancements are observable on aromatic hydrogens. This

suggests that the methyl group is on the same side of H-3 and far from the aromatic ring in position 5 of the pyrazolone ring. This is confirmed when the signal of H-2 is saturated (trace b). Strong NOE are observed on the *ortho*-hydrogens of the phenyl in position 5 of pyrazolone and on the CHO signal. These two data confirm that H-2 is close to the aromatic ring and to the CHO. Supposing the  $R^*$  configuration at the quaternary spiro-carbon, the above data assign the  $S^*$  configuration at C-2 and the  $R^*$  to C-3. When H-3 is saturated, a noticeable enhancement is also visible on H-6, i.e. the vinyl CH. This suggest that the vinyl group is on the same side of H-3. Saturation of H-3 at 3.44 ppm (trace c) shows NOE enhancement only on H-4 (the NOE on CHO is a control NOE), while no effect is observable on H-6. This confirm that H-3 and H-4 are in a *syn* relationship, implying the  $S^*$  configuration of C-4.

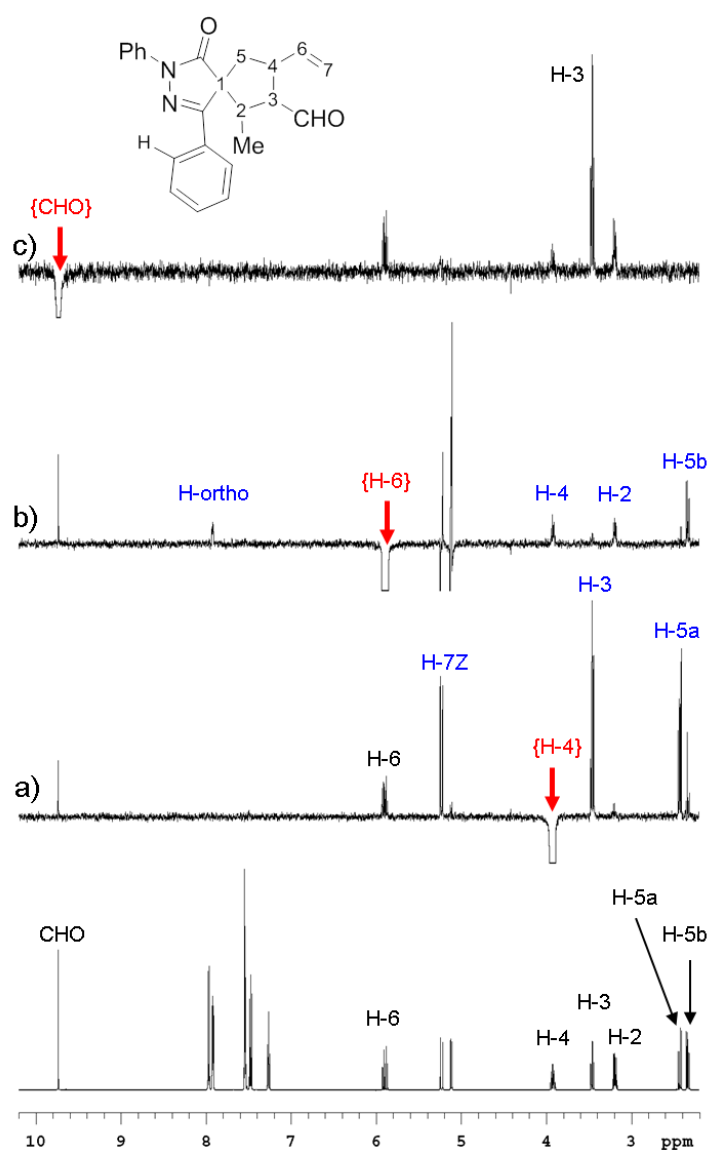

**Figure S2.** DPGSE-NOE spectra of compound **3n** (600 MHz in CD<sub>3</sub>CN)

Further NOE spectra were acquired to gain more redundancy and more information about the preferred conformation (Figure S2). When H-4 is saturated (trace a of Figure S2) a strong NOE is visible on H7<sub>z</sub>, stronger than the NOE experienced by H-6. This clearly indicates that the preferred conformation of the vinyl group puts H-6 in an *anti* relationship with H-4 (dihedral angle close to 180°). It is worth to note that saturation of H-6 yields weak but similar NOEs on H-4, H-2 and on the *ortho* hydrogens of the phenyl ring. The NOE data therefore assign the 1*R*\*,2*S*\*,3*R*\*,4*S*\* relative configuration to **3n**.

### Conformational analysis

Starting from the assigned relative configuration of **3n**, a complete conformational analysis was performed in order to find all the low-energy conformations. In the present case the spiro-structure is rather rigid, but it maintains some degree of conformational freedom. The all-carbon five-membered ring can assume different conformations due to its out-of-plane conformation, and the CHO and vinyl moieties can assume different orientations. A full scan of the potential energy surface (PES) was performed using molecular mechanics and the MMFF force field. All the energy minima enclosed in the lowest 10 kcal/mol range were then fully optimized using DFT calculations at the B3LYP/6-31g(d) level of theory. Frequency analysis was performed to check whether they corresponded to energy minima (no imaginary frequencies observed). After DFT optimization, four conformations were found to be enclosed in a  $\approx 3$  kcal/mol range (Figure S3 and Table 1). They are different because of the different relative dispositions of the CHO and vinyl moieties, with small modifications of the conformation of the aliphatic five-membered ring.

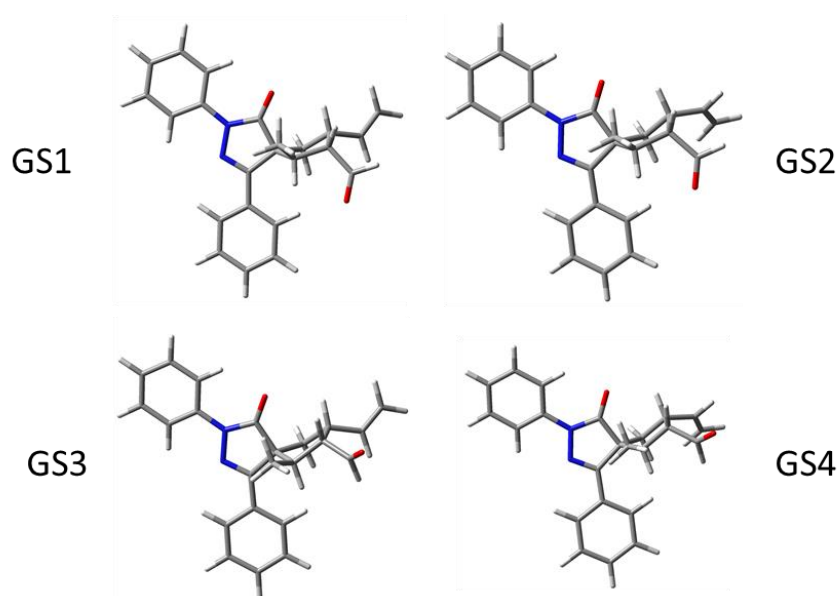

**Figure S3.** The four best conformations of **3n**, optimized at the B3LYP/6-31G(d) level.

Almost all the experimental NOEs well agree with the lowest energy conformation GS1. However, the NOE observed on H-6 when saturating H-2 (trace b in figure S1) suggests that the population of GS3 is not negligible, while calculations suggest a very small population (less than 1% at +25°C). DFT calculations were then run again at the B3LYP/6-31G(d) level taking into consideration the solvent (acetonitrile) using the PCM formalism.<sup>9</sup> The new results confirm that GS1 is the best conformation, but they also suggest a larger stabilization of GS3 (10% population) and GS4, in better agreement with the experimental NOE data.

**Table S2. relative energies of the four conformations of 3m. Optimization at the B3LYP/6-31G(d) level. Values in kcal/mol**

| Conf. | Gas phase   |         | PCM (acetonitrile) |         |
|-------|-------------|---------|--------------------|---------|
|       | H°          | Pop(H°) | H°                 | Pop(H°) |
| GS1   | <b>0.00</b> | 83      | <b>0.00</b>        | 71      |
| GS2   | 1.00        | 15      | 0.80               | 19      |
| GS3   | 2.89        | 1       | 1.32               | 8       |
| GS4   | 3.12        | <1      | 2.04               | 2       |

### Absolute configuration

Many compounds are viscous oils and anomalous dispersion X-ray crystallography<sup>10</sup> is unfeasible. For this reason, the absolute configuration of compound **3n** was determined by the theoretical simulations of chiro-optical spectra. The determination of the absolute configuration (AC) of chiral molecules using chiro-optical techniques such as circular dichroism (Electronic CD and Vibrational CD) has become very reliability because of the development of theoretical methods for the prediction of these properties based on DFT (for VCD) and on Time-Dependent DFT (for ECD).<sup>11</sup> In the present case the theoretical calculation of the electronic circular dichroism spectra (ECD) of **3n** was selected for the absolute configuration assignment. The ECD spectrum of **3n** was acquired in HPLC-grade

<sup>9</sup> J. Tomasi, B. Mennucci, R. Cammi, *Chem. Rev.*, **2005**, *105*, 2999-3093.

<sup>10</sup> For a review see: H. D. Flack, G. Bernardinelli, *Chirality*, **2008**, *20*, 681-690

<sup>11</sup> For reviews see: a) G. Bringmann, T. Bruhn, K. Maksimenka, Y. Hemberger, *Eur. J. Org. Chem.* **2009**, 2717-2727. b) T. D. Crawford, M. C. Tam, M. L. Abrams, *J. Chem. Phys. A* **2007**, *111*, 12057–12068. c) G. Pescitelli, L. Di Bari, N. Berova, *Chem. Soc. Rev.* **2011**, *40*, 4603-4625. For a review on conformational analysis for the absolute configuration determination see: A. Mazzanti, D. Casarini, D. *WIREs Comput. Mol. Sci.* **2012**, *2*, 613-641

acetonitrile solution ( $1 \cdot 10^{-4}$  M) with a cell path of 0.2 cm in the 190-400 nm region by the sum of 16 scans at 50 nm/min scan rate (Figure S4). Albeit rather weak, the experimental ECD spectrum exhibits a broad positive Cotton effect centred at 305 and 255 nm and two negative branches at 275 and 233 nm. The most intense region of the spectrum has a positive band at 215 and a negative one at 195 nm.

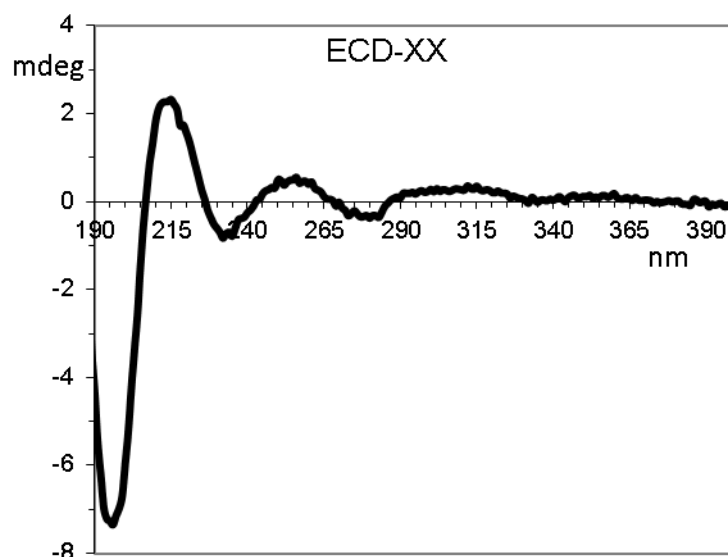

**Figure S4.** ECD spectrum of **3n** in acetonitrile

The TD-DFT simulations of the ECD spectra were performed using the geometries of the four conformations GS1-GS4 optimized at the PCM-B3LYP/6-31G(d) level. For data redundancy, calculations were performed with the hybrid functionals BH&HLYP<sup>12</sup> and M06-2X,<sup>13</sup> with  $\omega$ B97XD that includes empirical dispersion,<sup>14</sup> and with CAM-B3LYP<sup>15</sup> that includes long range correction using the Coulomb Attenuating Method. The calculations included the contribution of the solvent using the PCM formalism, and employed the 6-311++G(2d,p), that is known to yield good performances at a reasonable computational cost.<sup>16</sup> The rotational strengths were calculated in both length and velocity

<sup>12</sup> In Gaussian 09 the BH&HLYP functional has the form:  $0.5 \cdot E_x^{HF} + 0.5 \cdot E_x^{LSDA} + 0.5 \cdot \Delta E_x^{Becke88} + E_c^{LYP}$

<sup>13</sup>Y. Zhao and D.G. Truhlar, *Theor. Chem. Acc.* 2008, **120**, 215-241.

<sup>14</sup> J-D. Chai and M. Head-Gordon, *Phys. Chem. Chem. Phys.*, 2008, **10**, 6615-6620.

<sup>15</sup> T. Yanai, D. Tewand, and N.Handy, *Chem. Phys. Lett.* 2004, **393**, 51-57.

<sup>16</sup> a) M. Meazza, M. E. Light, A. Mazzanti and R. Rios. *Chem. Sci.* **2016**, 7, 984; b) P. Gunasekaran, S. Perumal, J. Carlos Menéndez, M. Mancinelli, S. Ranieri, A. Mazzanti, *J. Org. Chem.* **2014**, 79, 11039–11050. c) L. Caruana, M. Fochi, M. Comes Franchini, S. Ranieri, A. Mazzanti, L. Bernardi, *Chem. Commun.* **2014**, 50, 445-447. d) M.

representation, obtaining similar results (RMS difference < 5%) that ruled out large basis set incompleteness errors (BSSE).<sup>17</sup> The results of the TD-DFT calculations, assuming the 1*S*,2*R*,3*S*,4*R* absolute configuration are shown in Figure S5. All the simulations suggest a broad positive band at about 290 nm, while the band at 235 nm has different sign for different conformation, being positive in GS1 and GS2 and negative for GS3 and GS4. The two pairs are different because of the conformation of the formyl moiety. The higher energy region is mainly negative in conformation GS1, GS2 and GS4, while GS3 is weaker and positive. The whole trend is well replicated by all the four functionals used.

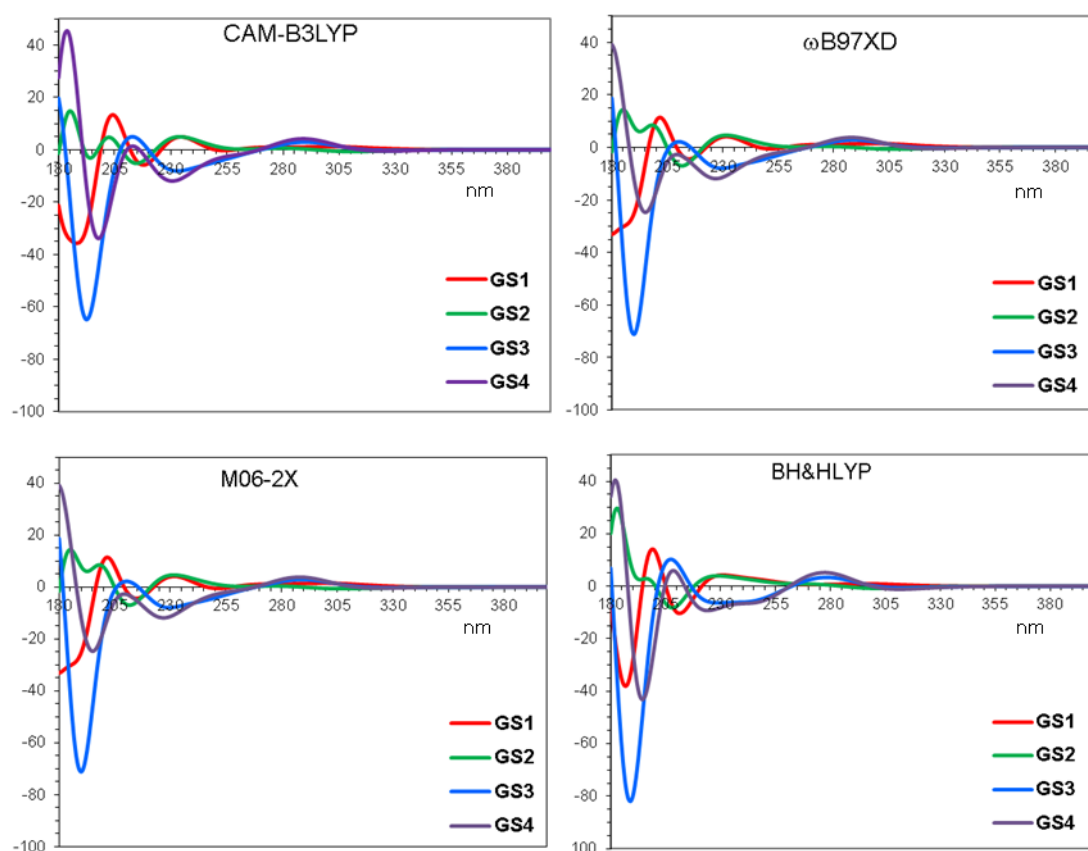

**Figure S5.** TD-DFT simulated spectra calculated for the four conformations of **3n** using CAM-B3LYP, BH&HLYP, M06-2X,  $\omega$ B97XD and the 6-311++G(2d,p) basis set. The solvent (acetonitrile) was included with the PCM formalism. For each conformation, the first 70 excited states were calculated, and the spectrum was obtained using a 0.25 eV line width at half height.

Ambrogì, A. Ciogli, M. Mancinelli, S. Ranieri, A. Mazzanti, *J. Org. Chem.* **2013**, *78*, 3709-3719. e) L. Caruana, M. Fochi, S. Ranieri, A. Mazzanti, L. Bernardi, *Chem. Commun.* **2013**, *49*, 880-882.

<sup>17</sup>P.J. Stephens, D.M. McCann, F.J. Devlin, J.R. Cheeseman and M.J. Frisch, *J. Am. Chem. Soc.* 2004, **126**, 7514-7521



The simulation of the weighted spectrum was obtained by using the populations obtained from Boltzmann distribution and the relative enthalpies obtained with the PCM-optimization (Table S2, 71:19:8:2 ratio). The simulated spectra were vertically scaled and red-shifted to get the best match with the experimental spectrum (Figure S6 scaling factors: 0.25, 0.3, 0.3, 0.25; red shift: 10, 12, 12, 13 nm for CAM-B3LYP,  $\omega$ B97XD, M06-2X and BH&HLYP, respectively). The red-shift was calibrated to match the most intense band at 195 nm. Regarding the shape, the four simulations are in a good agreement with the experimental spectrum. All of them correctly match the sign and sequence of the Cotton effects, but the low energy bands are slightly overestimated in energy (i.e. are simulated at shorter wavelengths). In any case, the simulations reliably assign the 1*R*, 2*S*, 3*R*, 4*S* absolute configuration to **3m**, when R-catalyst was used.

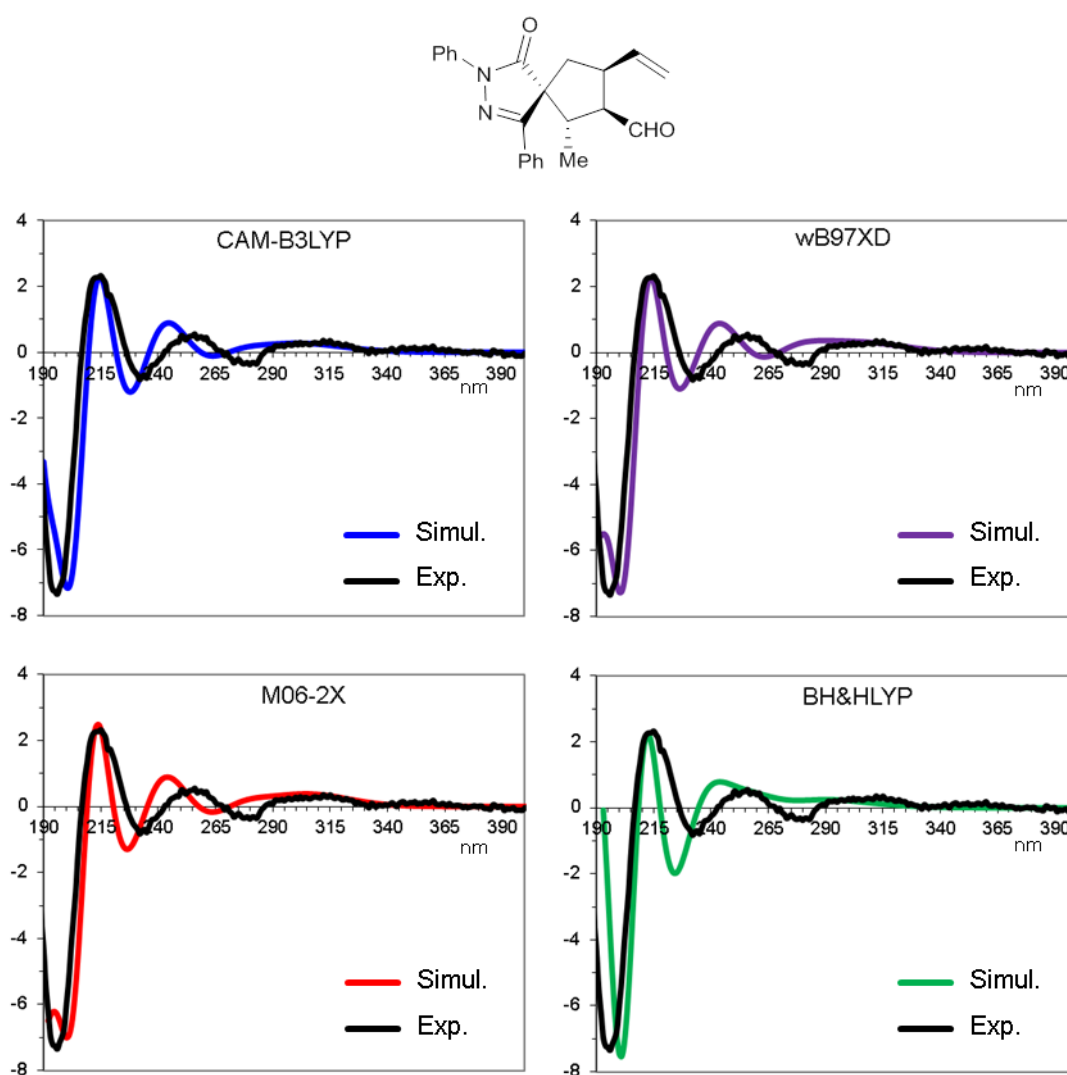

**Figure S6.** Simulations of the experimental ECD spectrum of **3n**. For each quadrant, the black line corresponds to the experimental spectrum. The colored lines correspond to the simulations obtained using the populations derived from PCM-B3LYP/6-31G(d) optimization.

### Minor diastereomer of **3n**

The relative configuration of the minor diastereomer of **3n** (hereafter **3n-minor**) was determined by NOE-NMR experiments (Figures S7 and S8).

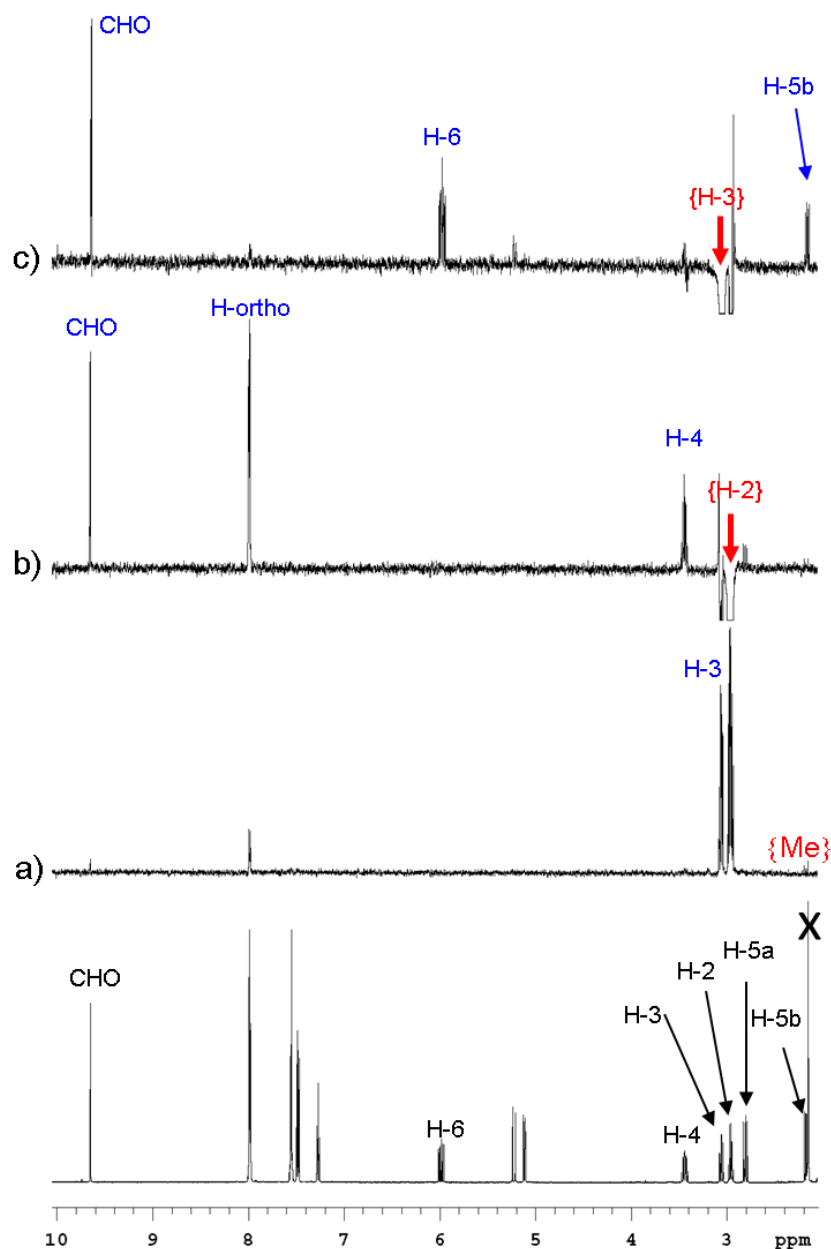

**Figure S7.** DPGSE-NOE spectra of compound **3n-minor** (600 MHz in CD<sub>3</sub>CN).

While the spectrum obtained by saturation of the 2-Me signal, is almost identical to that of the major diastereomer, the spectra obtained by saturation of H-2, H-4 and H-6 are largely different. A large NOE on H-4 was observed when H-2 was irradiated, and saturation of the H-4 signal at 3.42 ppm (trace a of Figure S7) yields a large NOE on the *ortho*-hydrogens of the phenyl ring, as well as a large NOE on H-2. These NOEs suggest that the configuration at C-4 is changed. This is confirmed when H-6

is saturated. A large NOE is visible on H-3 (trace b of Figure S8). It is therefore confirmed that the minor diastereomer of **3m** is epimer at C-4, thus implying the  $1R^*,2S^*,3R^*,4R^*$  relative configuration.

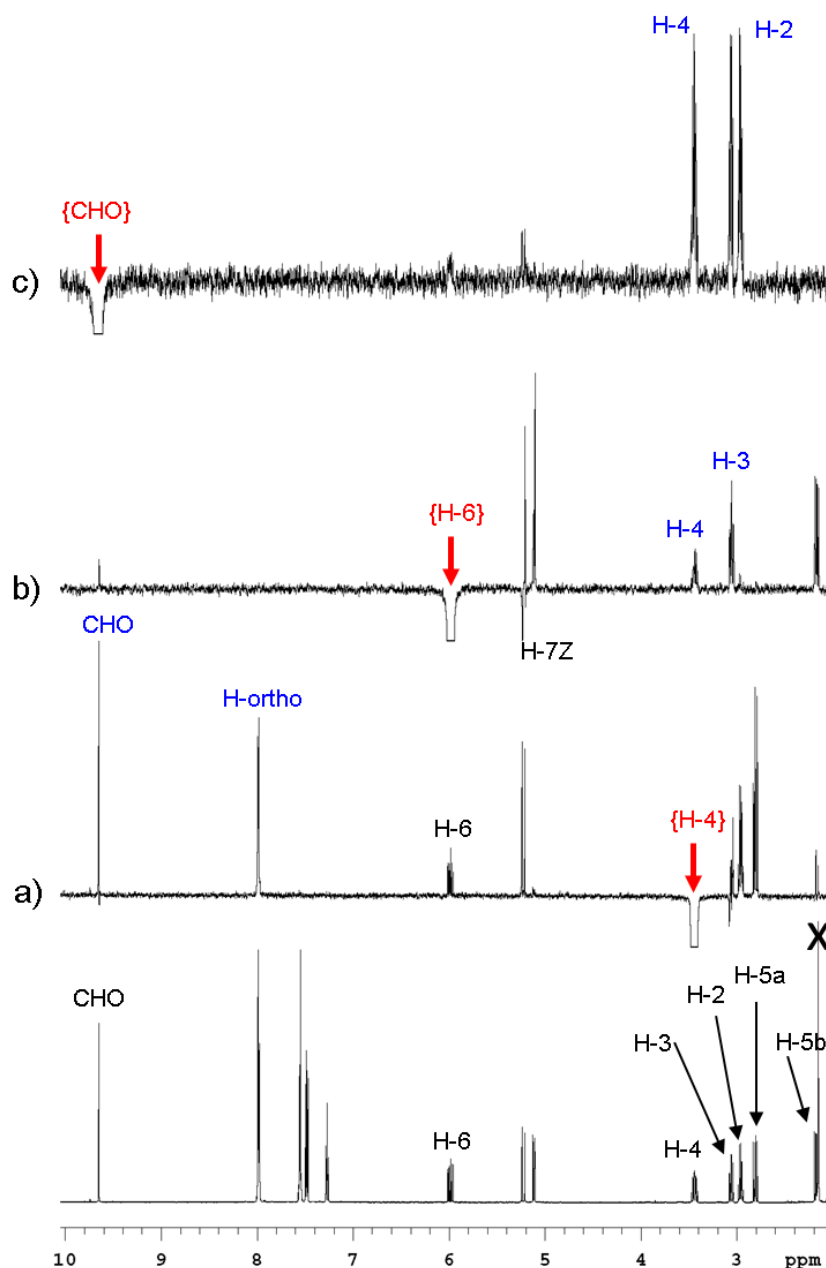

**Figure S8.** DPGSE-NOE spectra of compound **3n-minor** (600 MHz in CD<sub>3</sub>CN)

As in the case of the major diastereomer, the absolute configuration of **3n-minor** was derived from the simulation of its ECD spectrum. The ECD spectrum of **3n-minor** shows the same trend of the major diastereomer, but with different intensity of the Cotton effects (Figure S9).

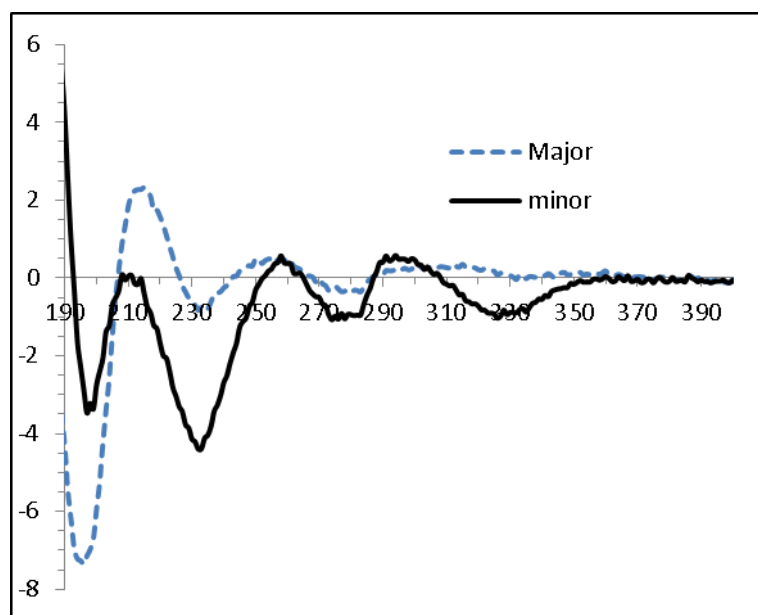

**Figure S9.** ECD spectrum of **3n-minor** (black trace) compared with the ECD spectrum of **3n** (dotted blue trace).

The exploration of the PES and subsequent optimization by DFT at the PCM-B3LYP/6-31G(d) level of theory suggested the existence of five conformations, comprised into a 2 kcal/mol energy window (Figure S10 and Table S3).

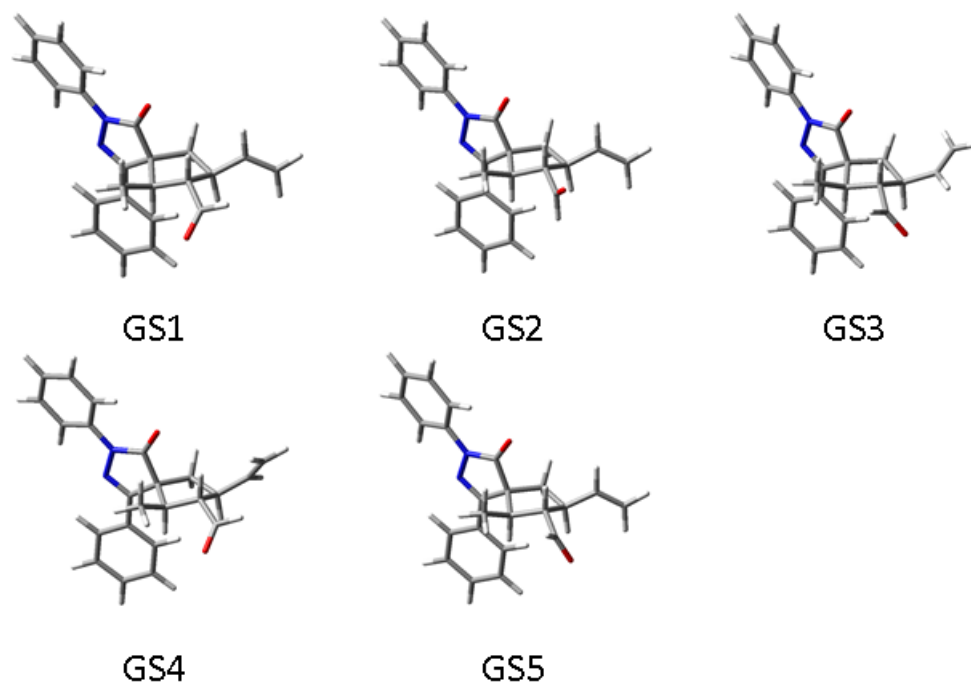

**Figure S10.** Optimized structures of the 5 best conformations of **3n-minor**

**Table S3.** Relative energies of the four conformations of 3m-minor. Optimization at the B3LYP/6-31G(d) level. Values in kcal/mol

| Conf | PCM (acetonitrile) |             |         |
|------|--------------------|-------------|---------|
|      | E                  | H°          | Pop(H°) |
| GS1  | <b>0.00</b>        | <b>0.00</b> | 53      |
| GS2  | 0.31               | 0.26        | 34      |
| GS3  | 2.01               | 2.15        | 1       |
| GS4  | 1.95               | 2.01        | 2       |
| GS5  | 0.89               | 0.94        | 10      |

The simulations of the ECD spectrum were obtained assuming the 1*R*, 2*S*, 3*R*, 4*R* absolute configuration, using the same functionals and basis sets already employed for the major diastereomer.

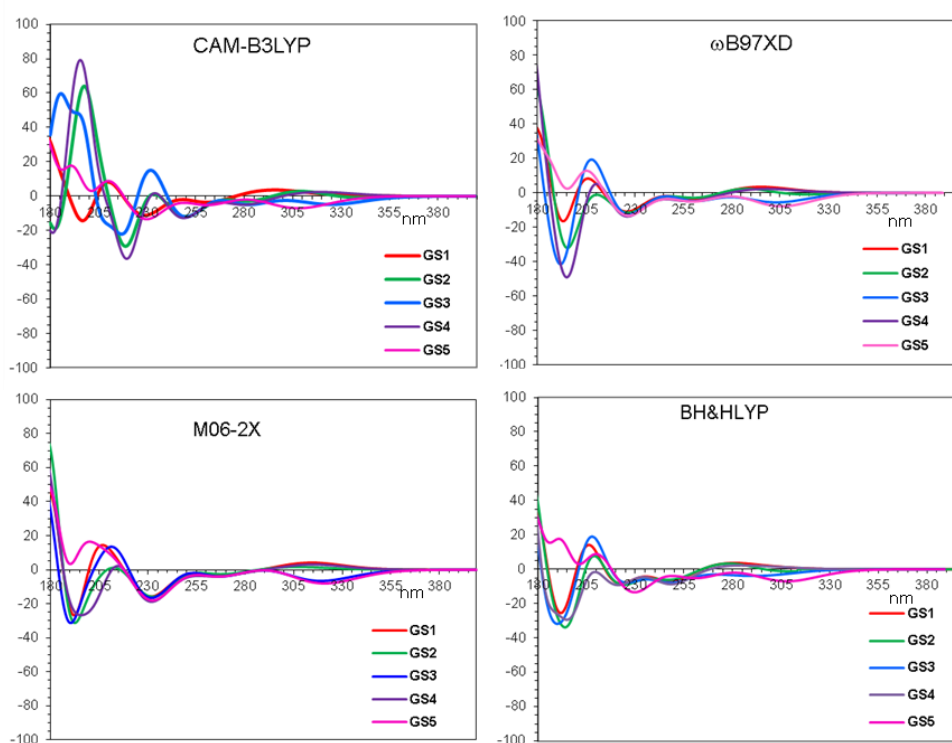

**Figure S11.** TD-DFT simulated spectra calculated for the four conformations of **3n-minor** using CAM-B3LYP, BH&HLYP, M06-2X,  $\omega$ B97XD and the 6-311++G(2d,p) basis set. Solvent acetonitrile was included with the PCM formalism. For each conformation the first 70 excited states were calculated, and the spectrum was obtained using a 0.25 eV line width at half height.

The relative population to be used in the simulation of the experimental ECD was derived from the relative enthalpies of optimized geometries (53:31:2:2:12 for GS1-GS5, respectively). The simulations for 1*R*, 2*S*, 3*R*, 4*R* absolute configuration (figure S11 and S12) show a good agreement with the experimental spectrum, particularly when using the CAM-B3LYP and  $\omega$ B97XD functionals.

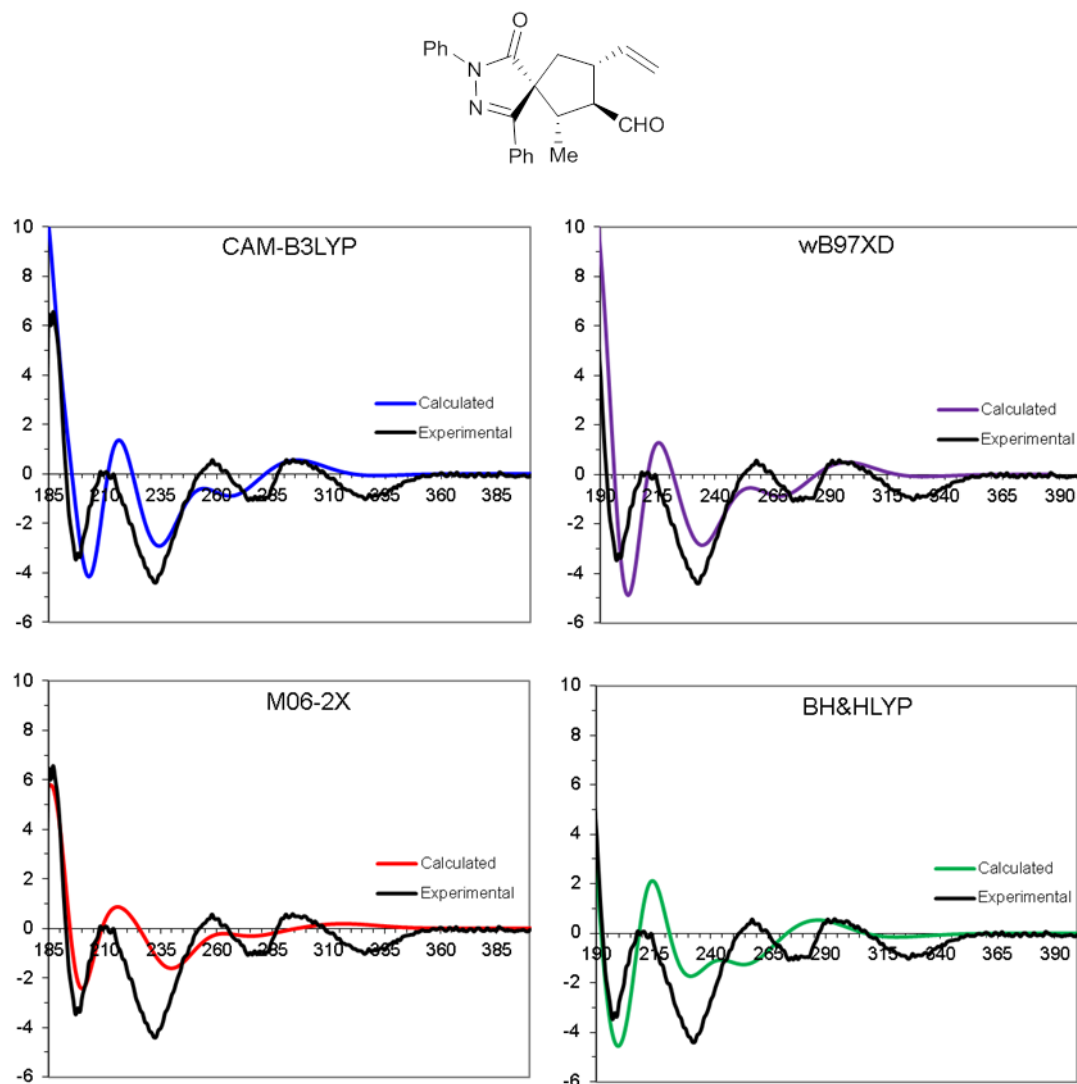

**Figure S12.** Simulations of the experimental ECD spectrum of **3n-minor**. For each quadrant, the black line corresponds to the experimental spectrum. The colored lines correspond to the simulations obtained using the populations derived from PCM-B3LYP/6-31G(d) optimization.

## 2-Phenyl compound (3g)

The relative configuration of compound **3g** was derived from NOE-NMR as in the case of **3n** and **3n-minor**. The major diastereomer was purified by reverse-phase HPLC on C18 column. All the  $^1\text{H}$  and  $^{13}\text{C}$  chemical shifts were assigned by 2D-NMR spectroscopy (COSY, HSQC and HMBC). Apart from the different chemical shifts, the  $^1\text{H}$  region of the spectrum including H-2, H-3 and H-4 (Figure S13) is very similar to that of the major diastereomer of **3n**, and the coupling constant are very similar too.

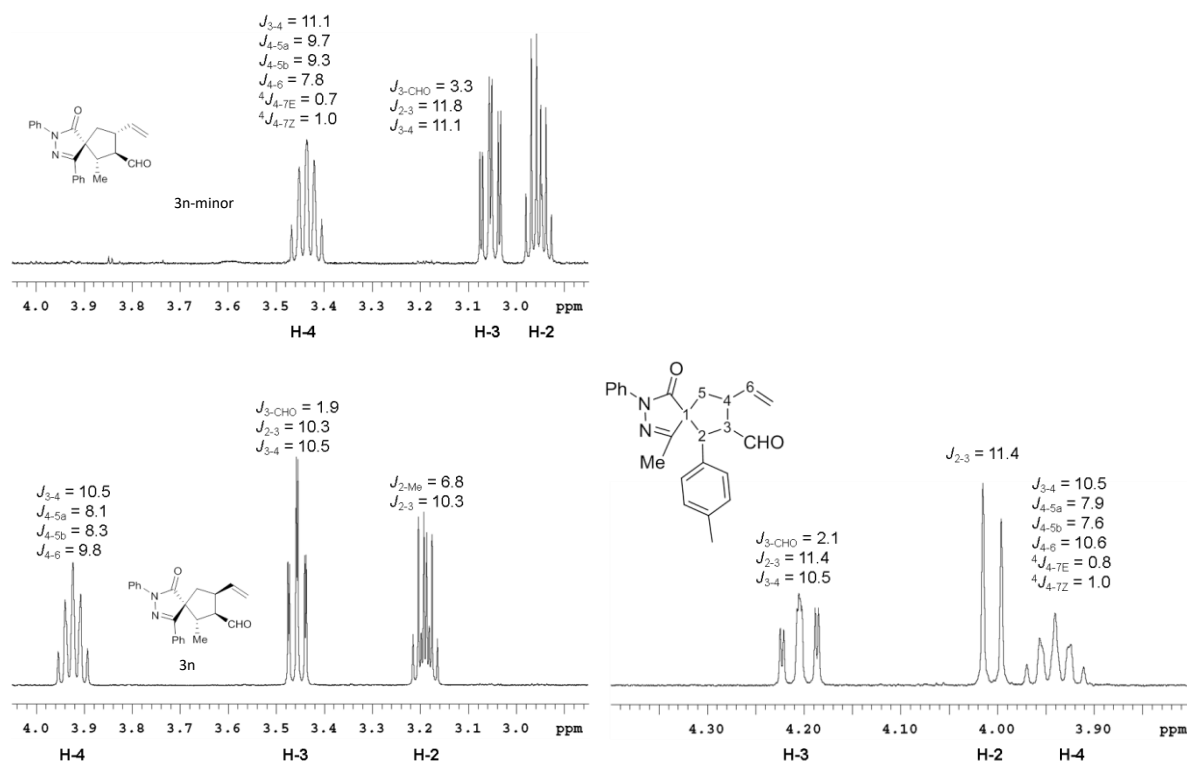

**Figure S13:** Left: portion of the  $^1\text{H}$  spectrum of **3n** and **3n-minor**. Right: portion of the  $^1\text{H}$  spectrum of **3g** (600 MHz in  $\text{CD}_3\text{CN}$ ).

On saturation of the methyl signal of pyrazolone (hereafter methyl) a strong NOE was observed on H-2 (trace a of Figure S14), but a noticeable NOE was observed also on the *ortho* hydrogens of the phenyl in position 2. The spatial proximity between the Methyl and H-2 was confirmed by the saturation of H-2 (trace c of Figure S13), where the *ortho* hydrogens of the phenyl act as a control signal. In the same spectrum an intense NOE is visible also on H-6. This implies that the vinyl group is on the same side of H-2 with respect to the cycle. Saturation of H-3 (trace a in Figure S15) yields strong NOEs on the CHO (control signal), on the *ortho* hydrogens and on H-4. This means that H-3 and H-4 are on the same side of the cycle and on the opposite side of H-2. The above consideration suggests the  $1R^*,2R^*,3R^*,4S^*$ . It should be noted that the actual spatial disposition of the substituents is the same observed for the major diastereomer of **3n**, and that the different

stereochemical descriptor at C-2 is due to the higher priority of the phenyl group of **3g** with respect to the methyl in compound **3m**.

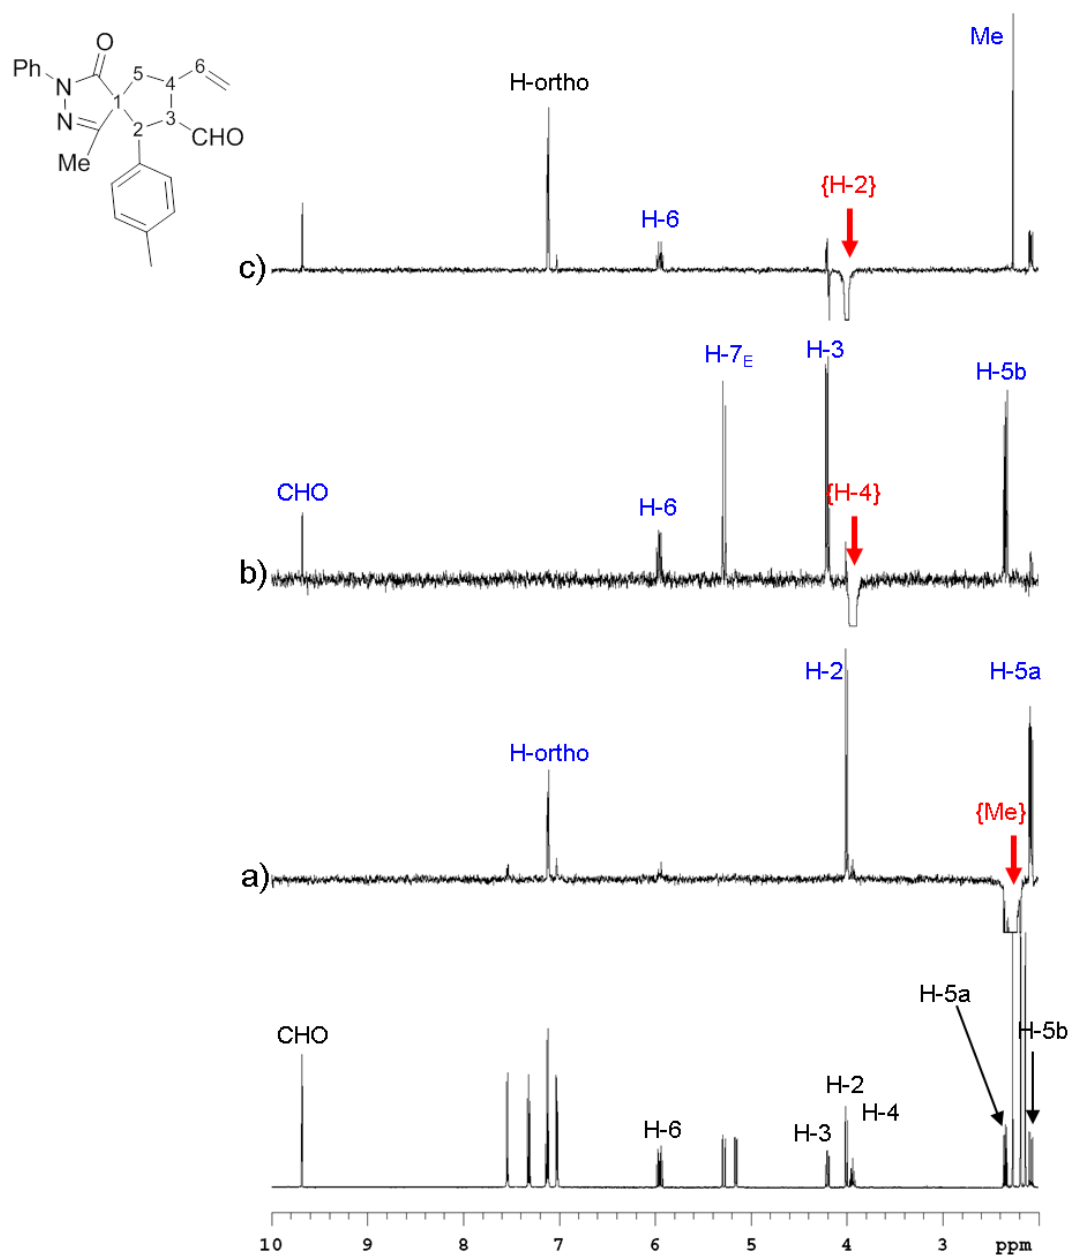

**Figure S14.** DPGSE NOE spectra of **3g** (600 MHz in CD<sub>3</sub>CN). Bottom: control spectrum. Traces a-c: NOE spectra obtained on saturation of Methyl, H-4 and H-2.



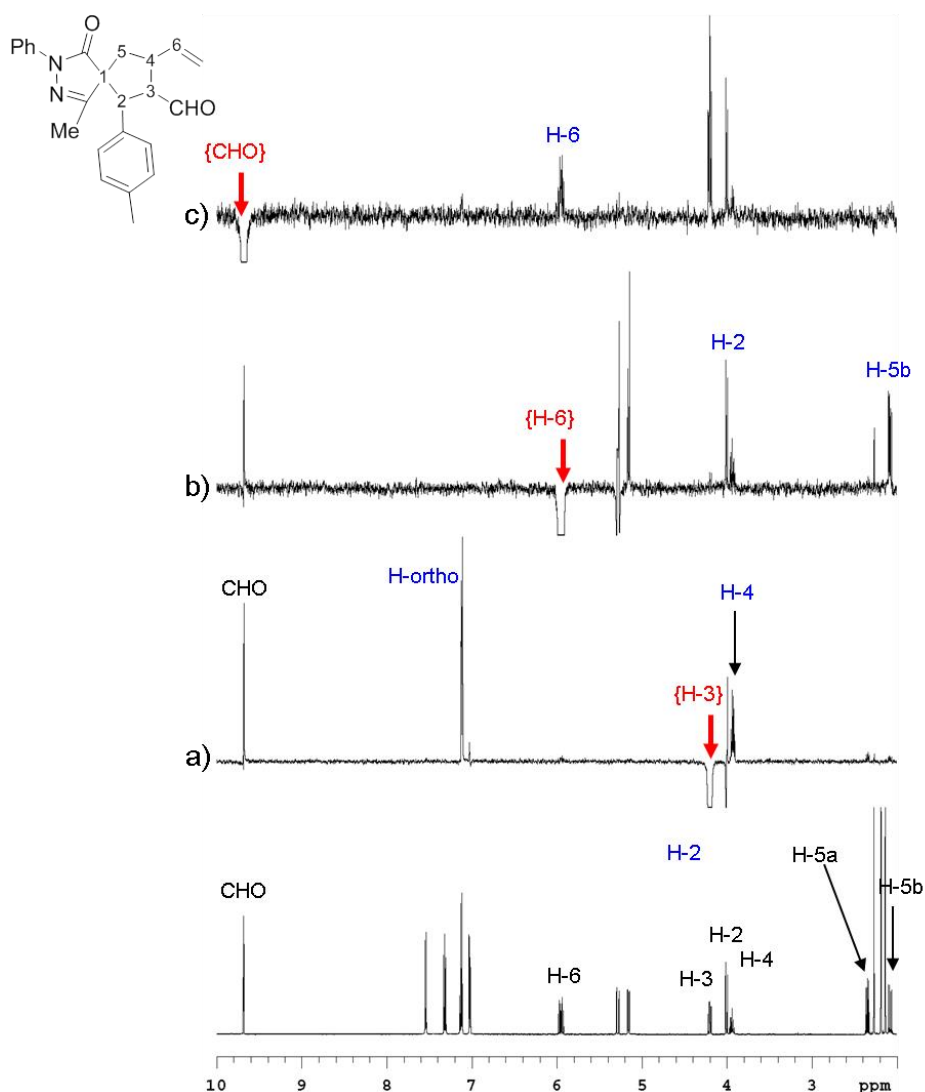

**Figure S15.** DPGSE NOE spectra of **3g** (600 MHz in CD<sub>3</sub>CN). Bottom: control spectrum. Traces a-c: NOE spectra obtained on saturation of H-3, H-6 and CHO.

Conformational analysis of **3g** yielded again four conformations comprised into a 2 kcal/mol energy window (Table S4 and Figure S16). As for **3n**, calculations were run at the B3LYP/6-31G(d) level of theory and including the solvent acetonitrile using the PCM formalism.

**Table S4. Relative energies of the four conformations of **3g**. Optimization at the B3LYP/6-31G(d) level. Values in kcal/mol.**

| Conf | PCM (acetonitrile) |             |         |
|------|--------------------|-------------|---------|
|      | E                  | H°          | Pop(H°) |
| GS1  | <b>78</b>          | <b>0.00</b> | 69      |
| GS2  | 10                 | 0.65        | 23      |
| GS3  | 9                  | 1.44        | 6       |
| GS4  | 3                  | 2.02        | 2       |

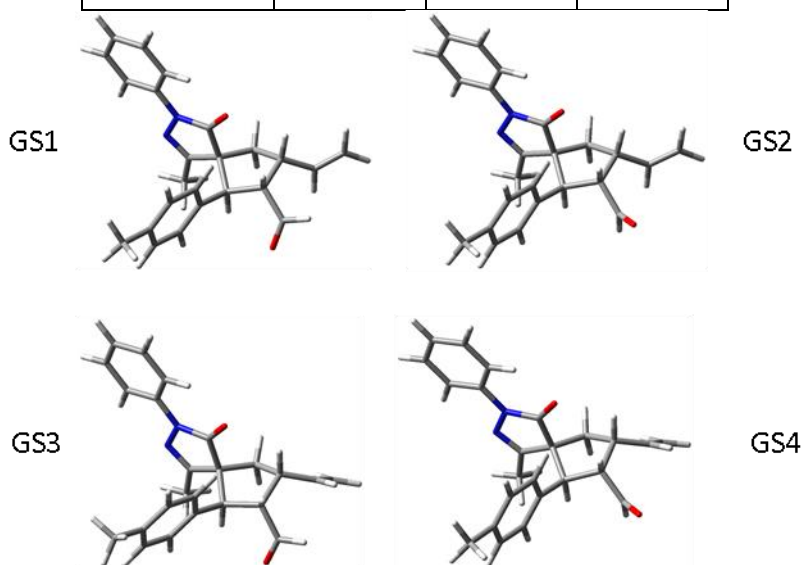

**Figure S16.** 3D optimized geometries of the four conformations of **3g**

The ECD spectrum of **3g** was acquired in acetonitrile as in the previous cases. Due to the presence of the phenyl in position 2, that is tilted out of the plane of pyrazolone, the ECD spectrum of **3g** is more intense, showing two strong bands at 240 and 202 nm (Figure S17).

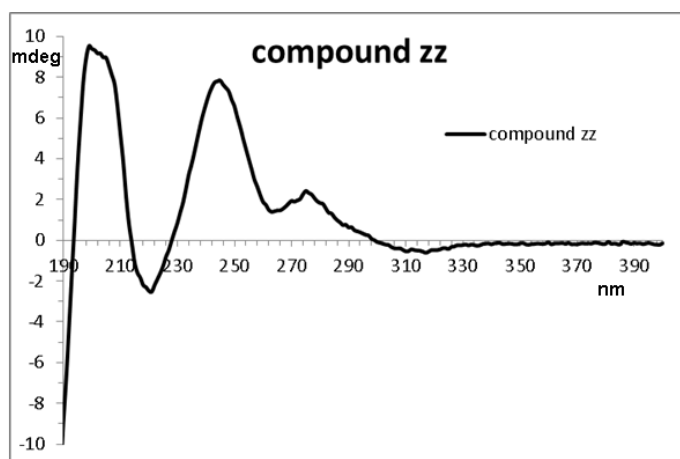

**Figure S17.** Experimental ECD spectrum of **3g** in acetonitrile

TD-DFT calculation of the ECD spectra of the four conformations were obtained using CAM-B3LYP, BH&HLYP, M06-2X,  $\omega$ B97XD and the 6-311++G(2d,p) basis set, and the solvent was included using PCM (Figure S17). Compound **3g** was obtained with the pseudoenantiomeric *S*-catalyst, thus the simulations were run supposing the 1*S*, 2*S*, 3*S*, 4*R* absolute configuration. The simulation of the experimental ECD spectrum was obtained using the population ratio derived from Boltzmann distribution and the relative energies from Table 3 (69:23:6:2 for GS1-GS4, respectively). The weighted spectra reproduce very well the experimental ones, in particular when M06-2X was used (Figure S18 and S19).

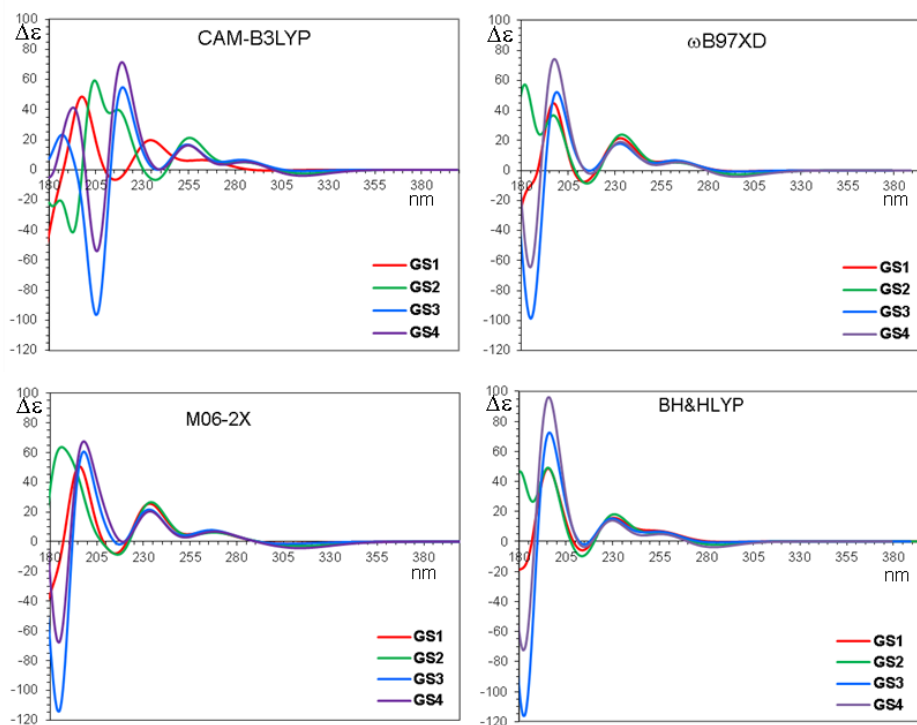

**Figure S18.** Top: TD-DFT simulated spectra calculated for the four conformations of **3g** using CAM-B3LYP, BH&HLYP, M06-2X,  $\omega$ B97XD and the 6-311++G(2d,p) basis set. Solvent acetonitrile was included with the PCM formalism. For each conformation the first 70 excited states were calculated, and the spectrum was obtained using a 0.25 eV line width at half height.

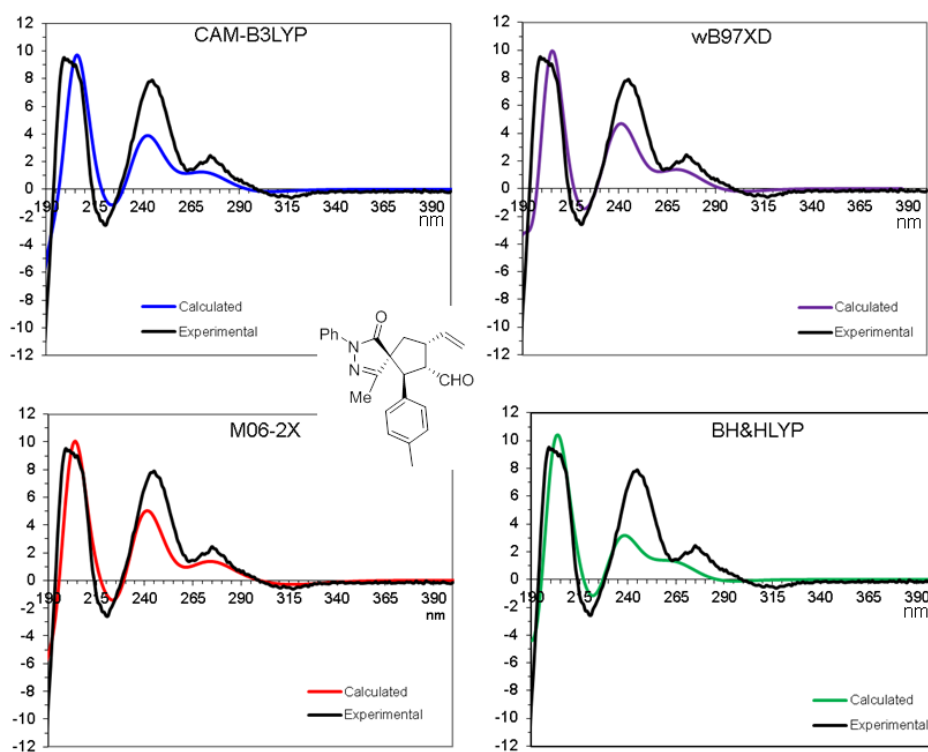

**Figure S19.** Simulations of the experimental ECD spectrum of **3g-major**. For each quadrant, the black line corresponds to the experimental spectrum. The colored lines correspond to the simulations obtained using the populations derived from PCM-B3LYP/6-31G(d) optimization.

## 7. NMR spectra starting material

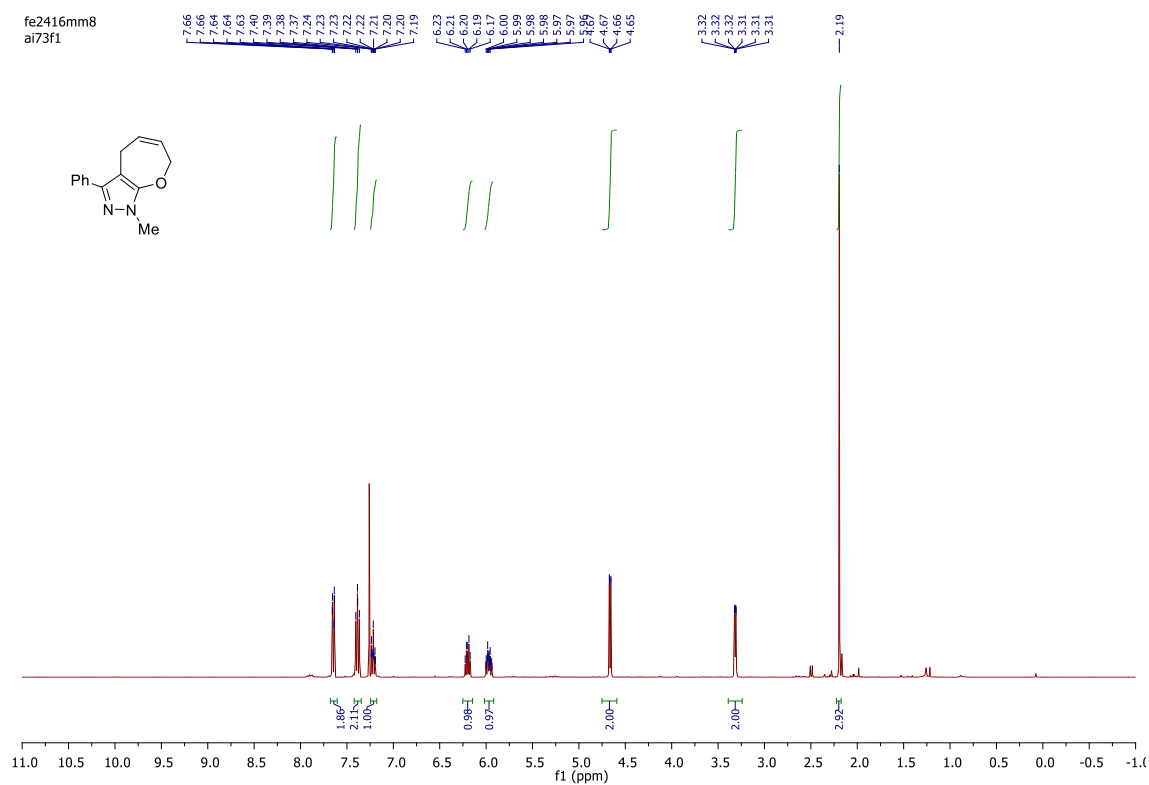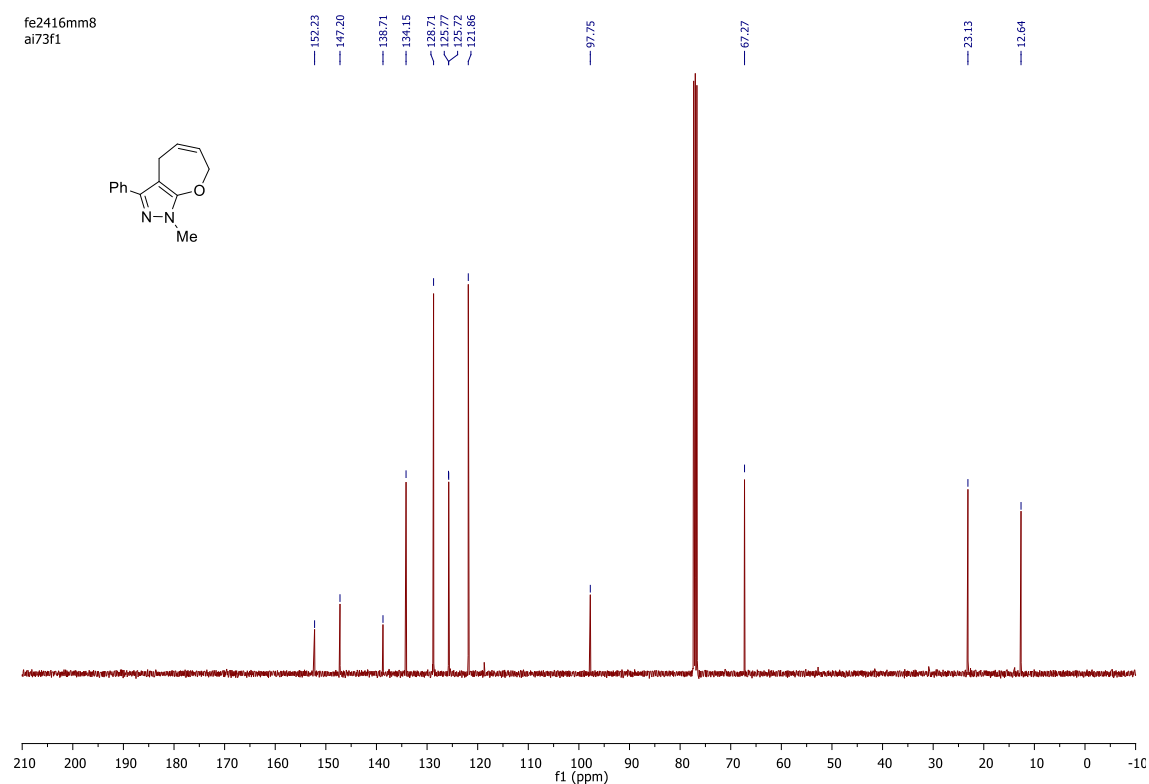

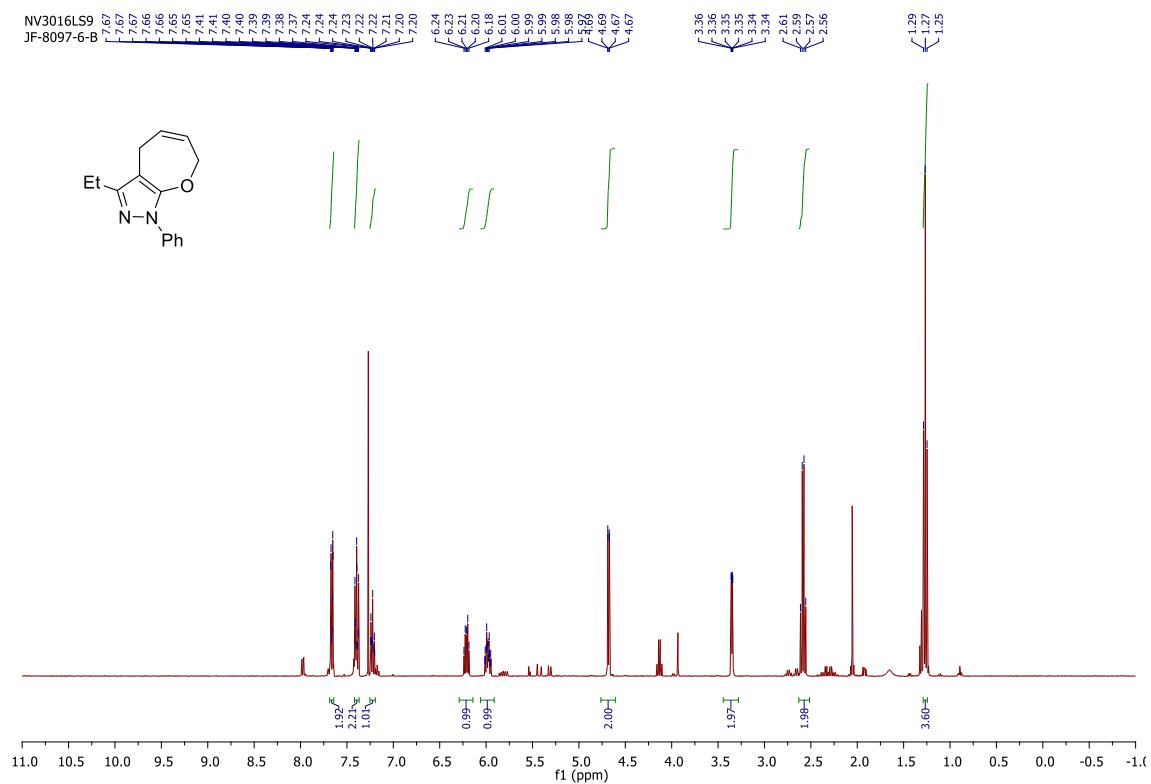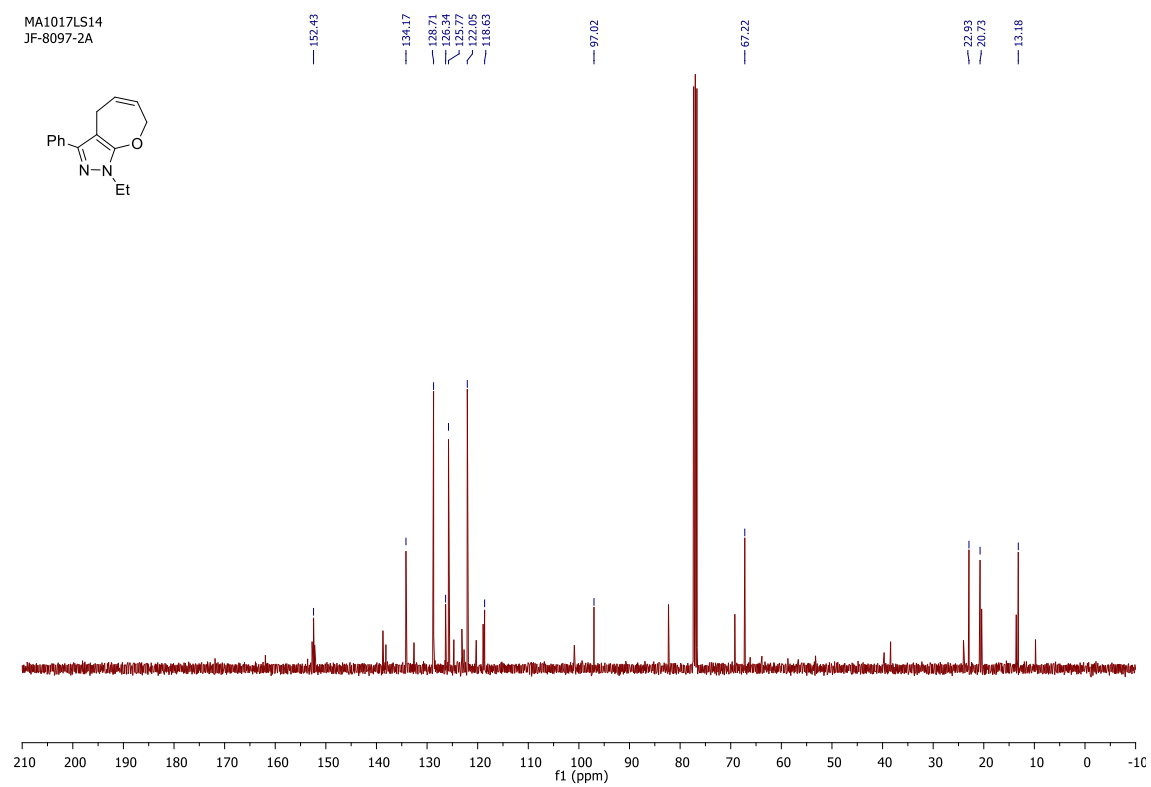

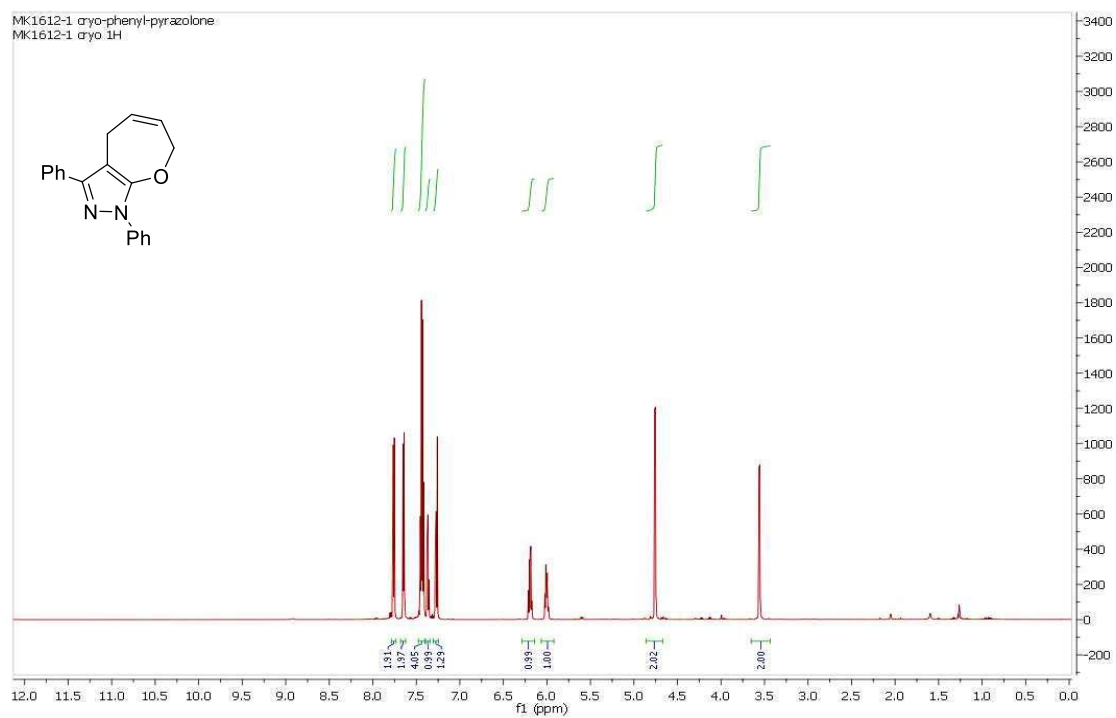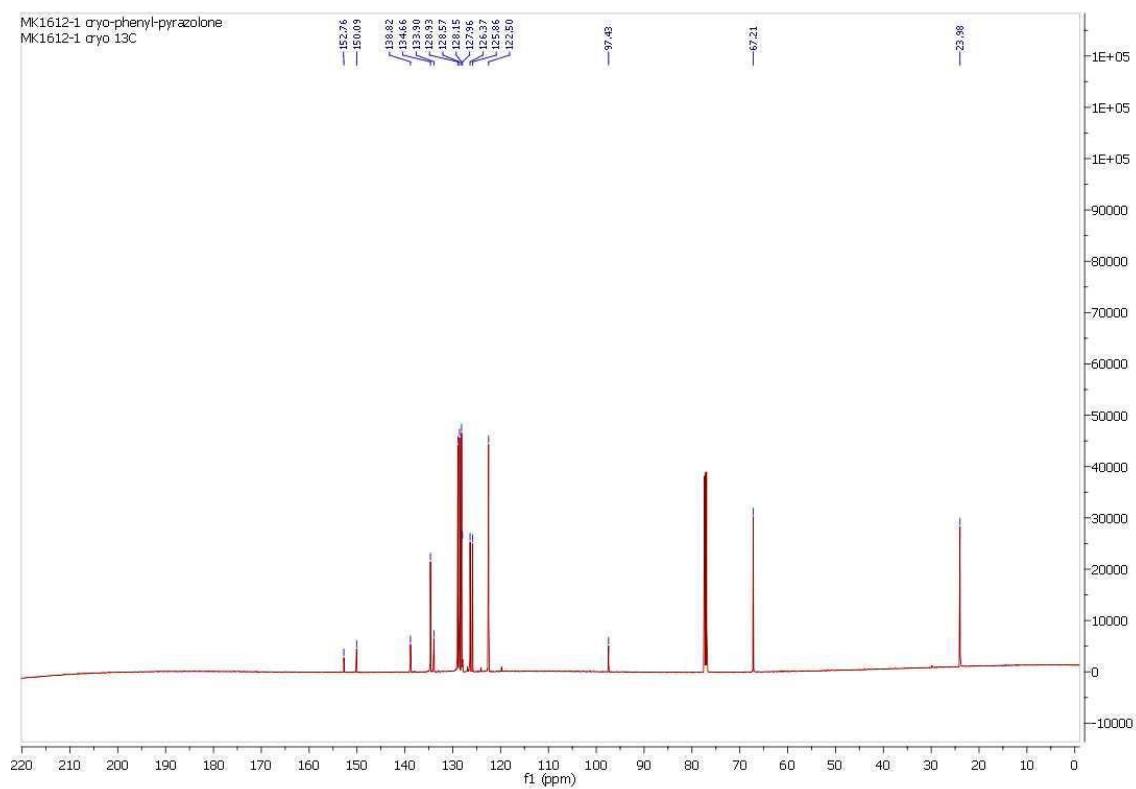

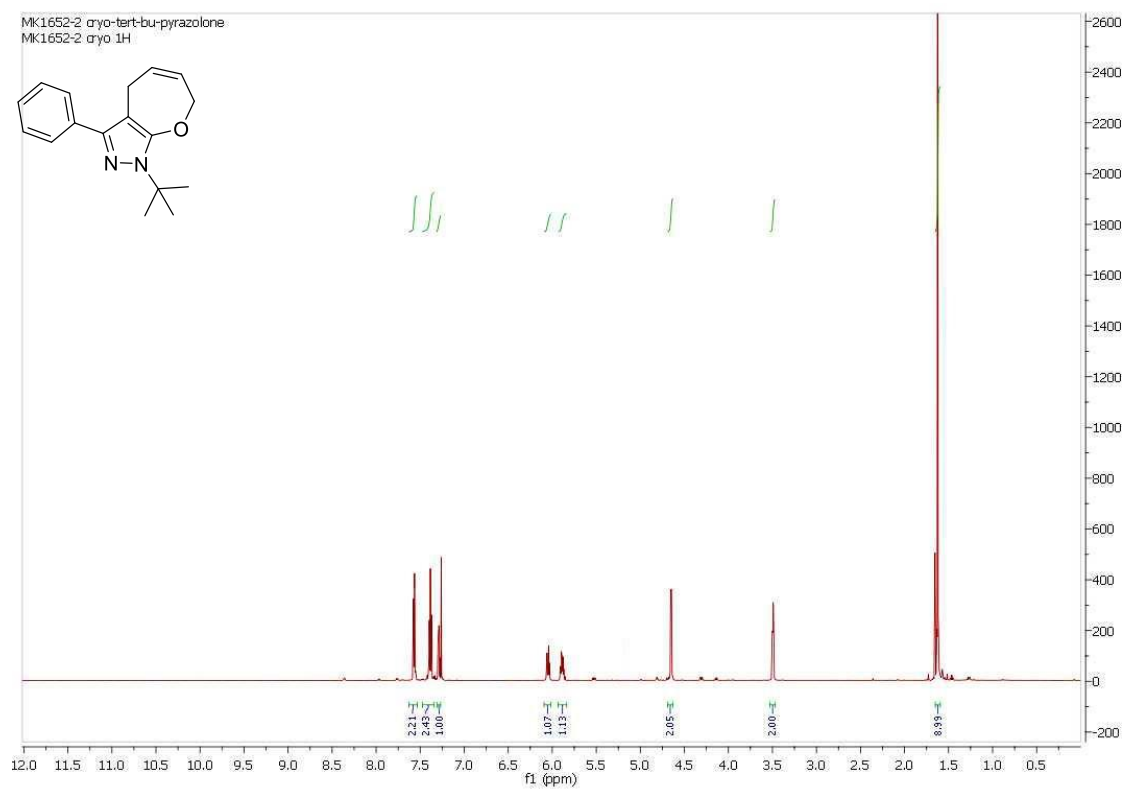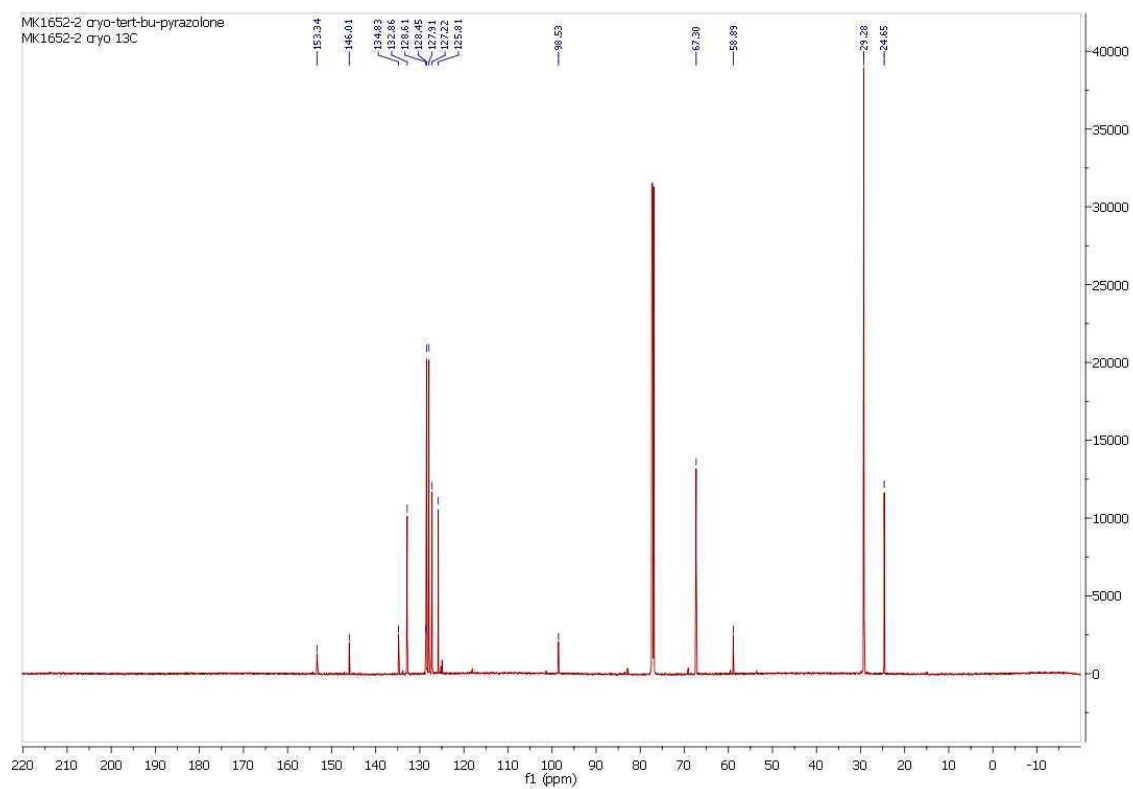



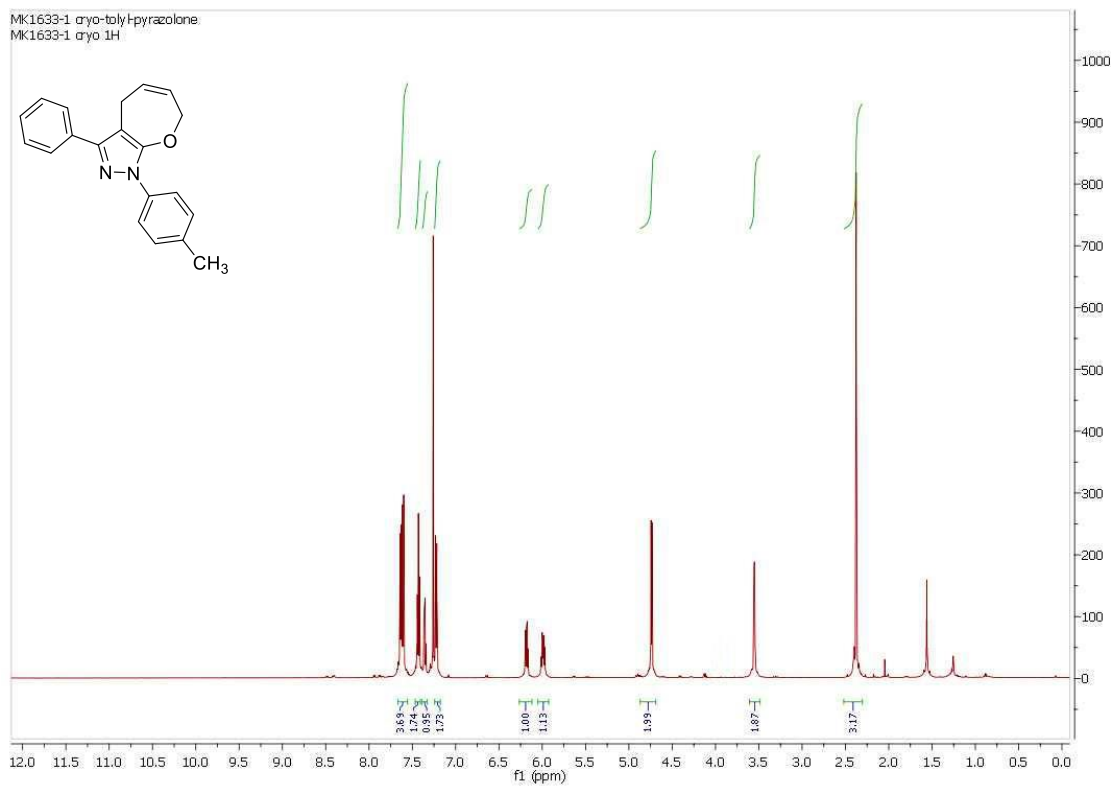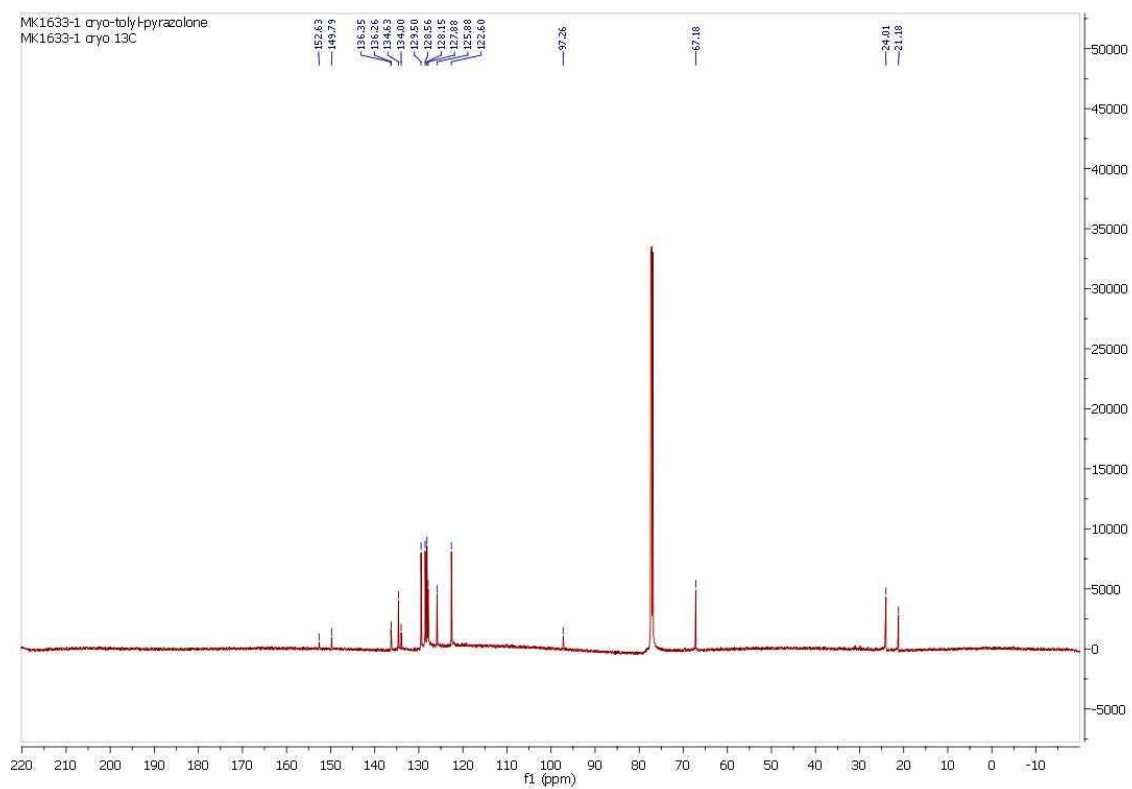

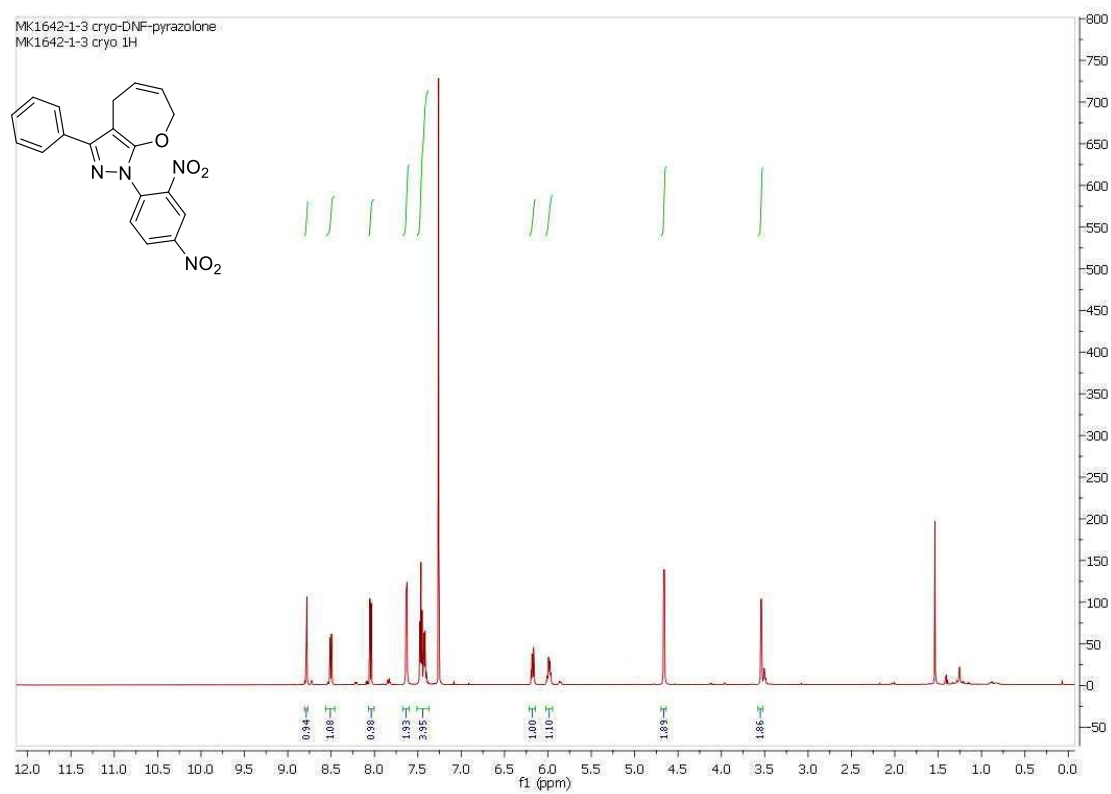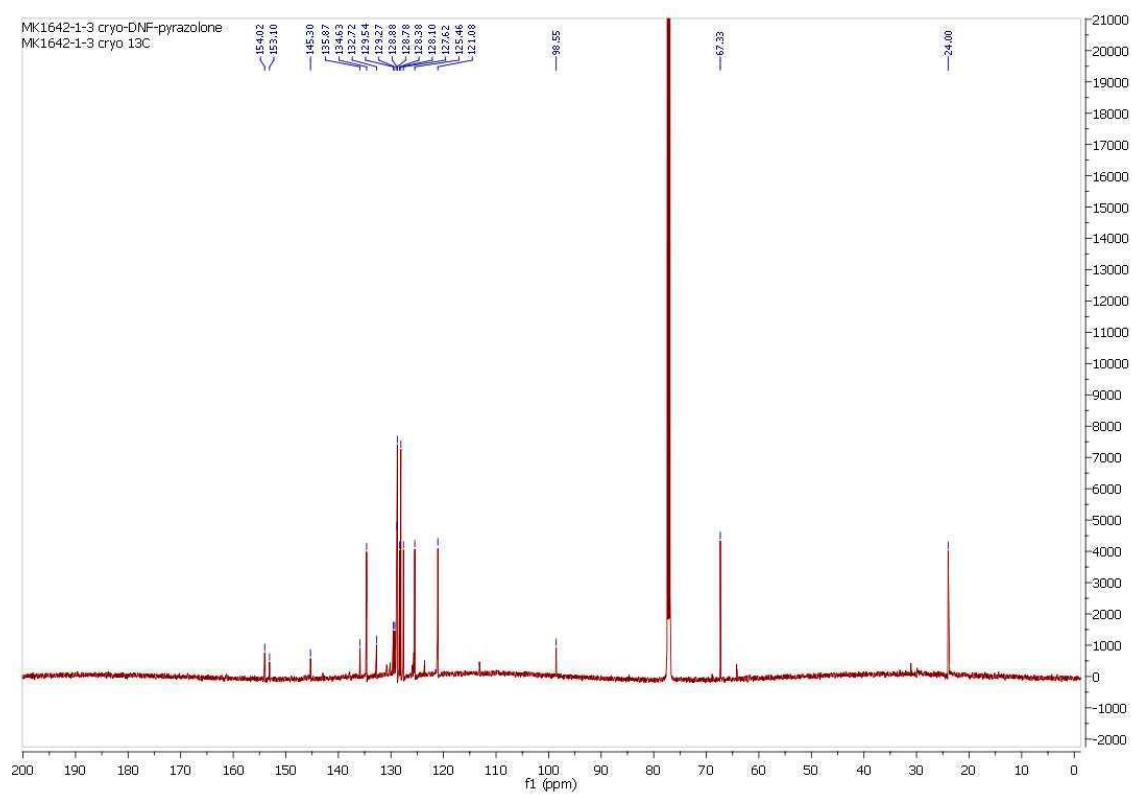

## 8. NMR spectra spiro compounds

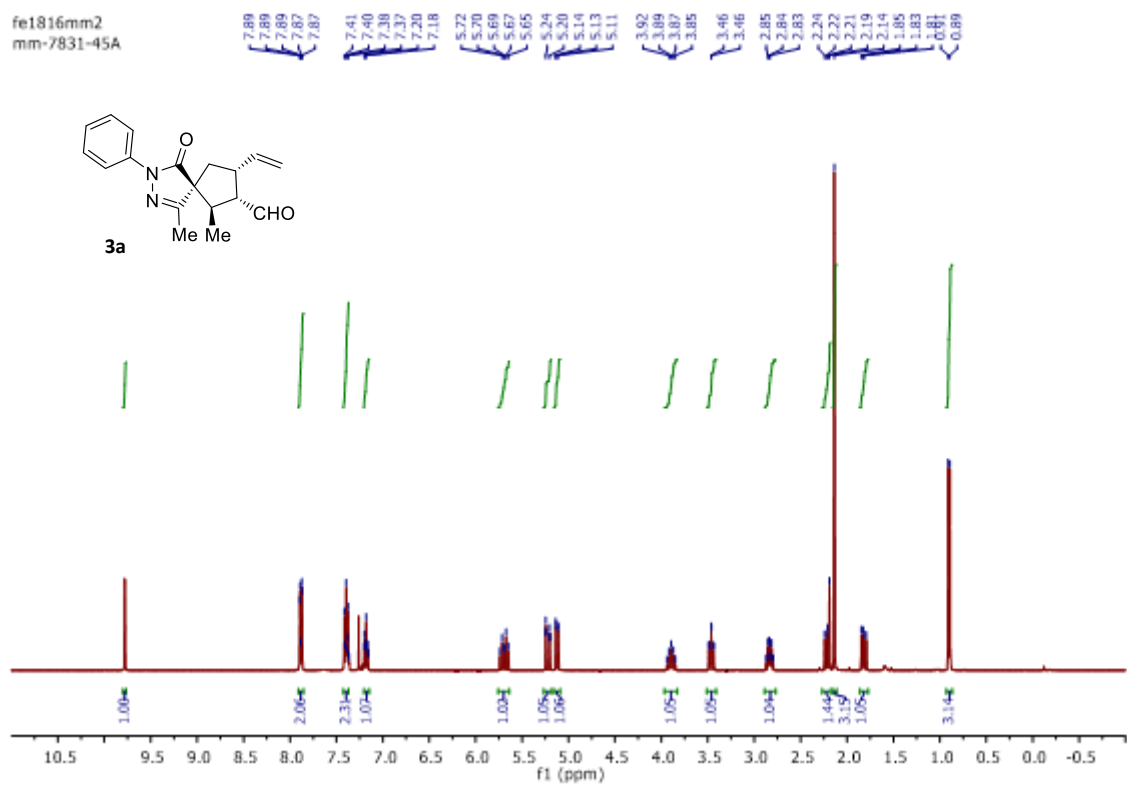

v

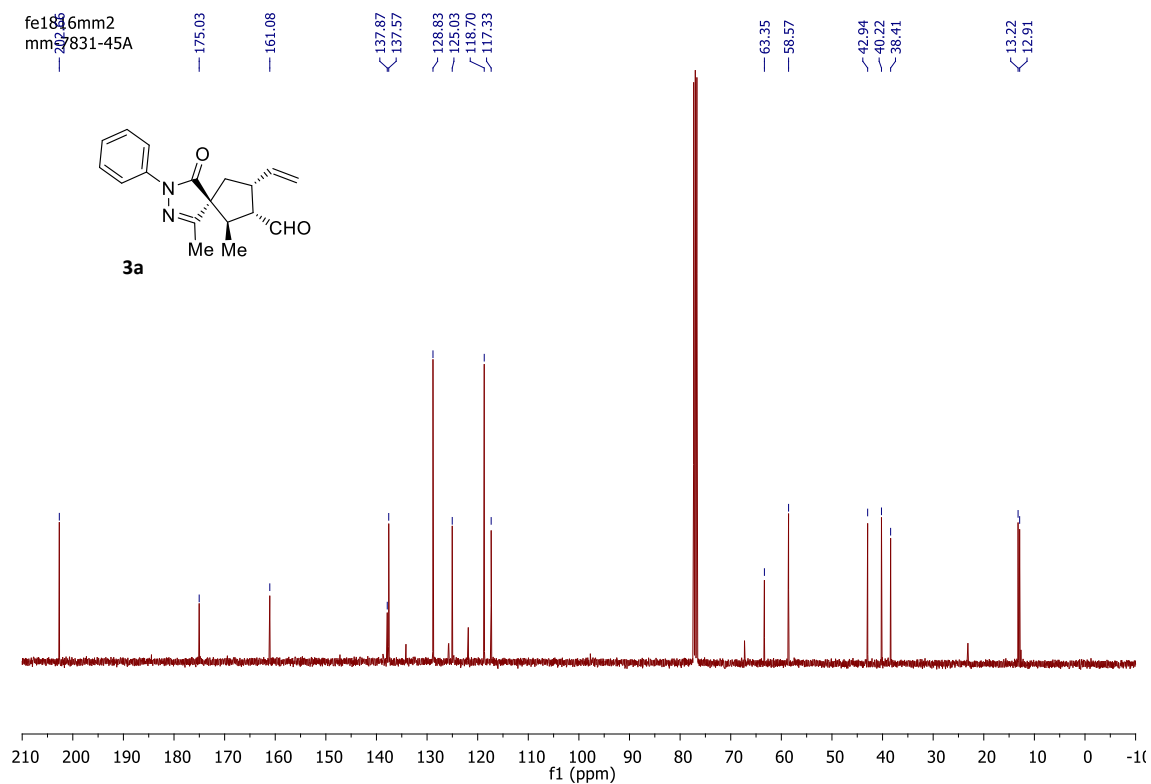



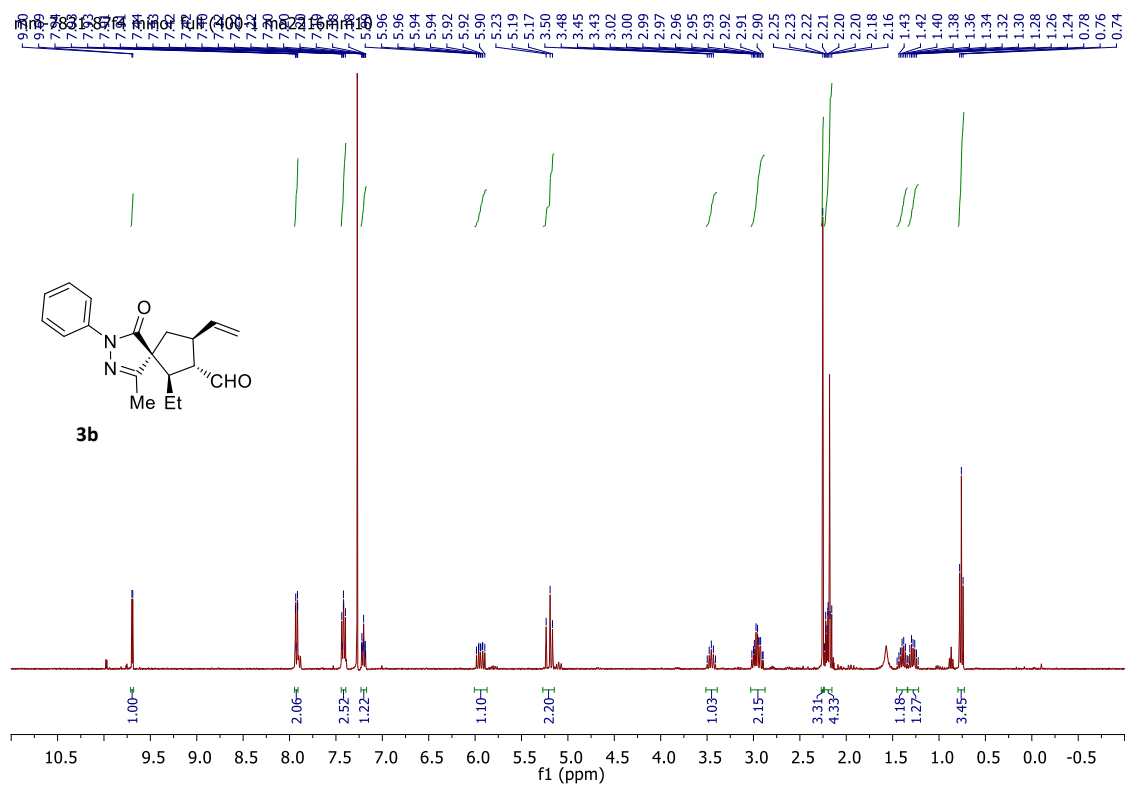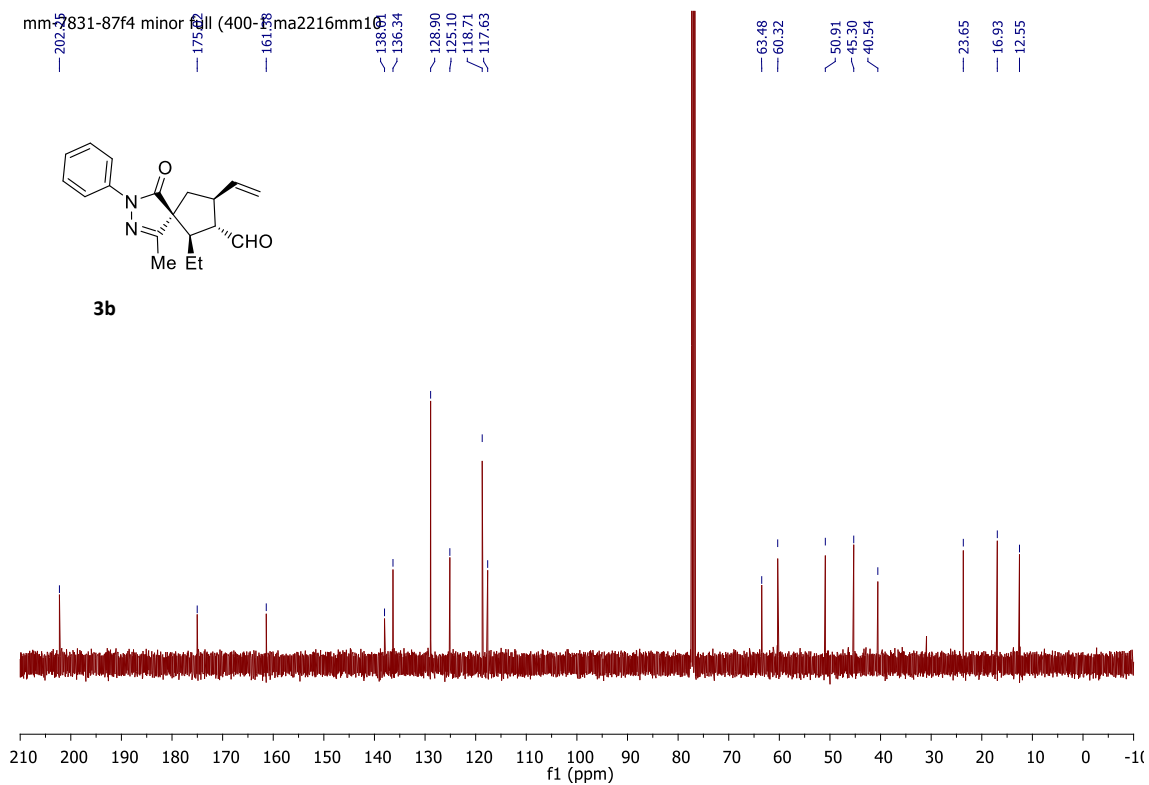

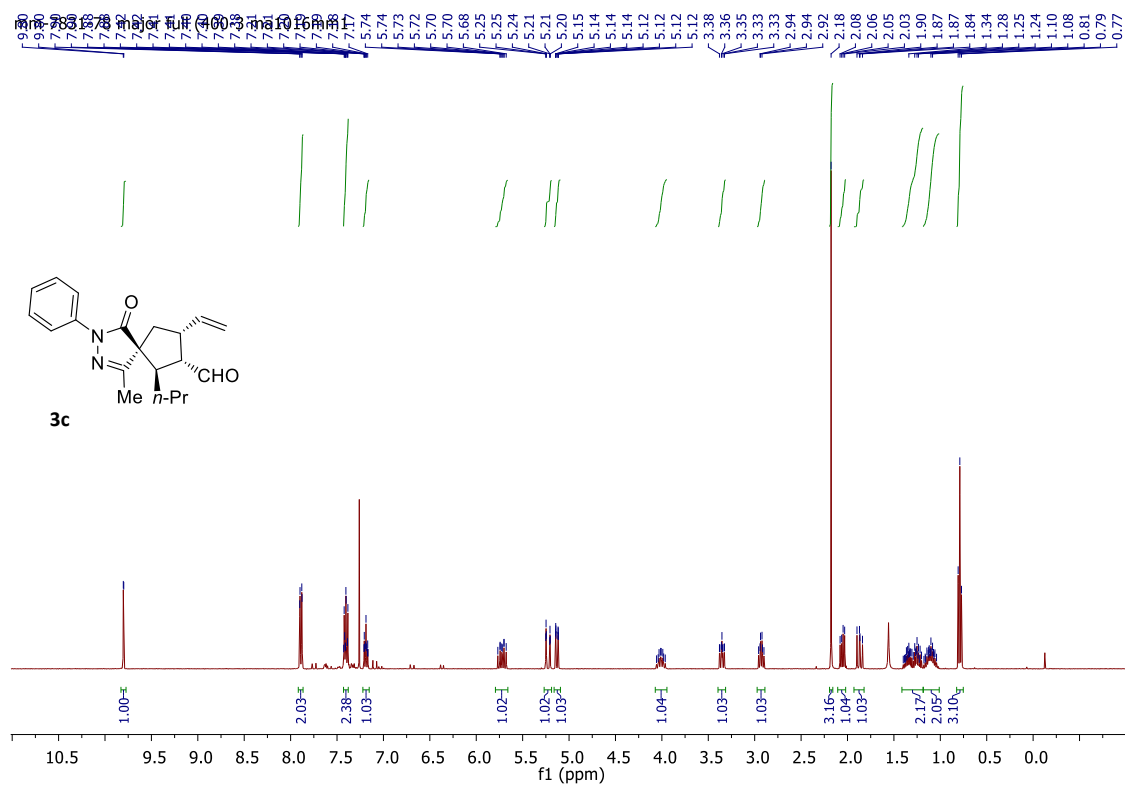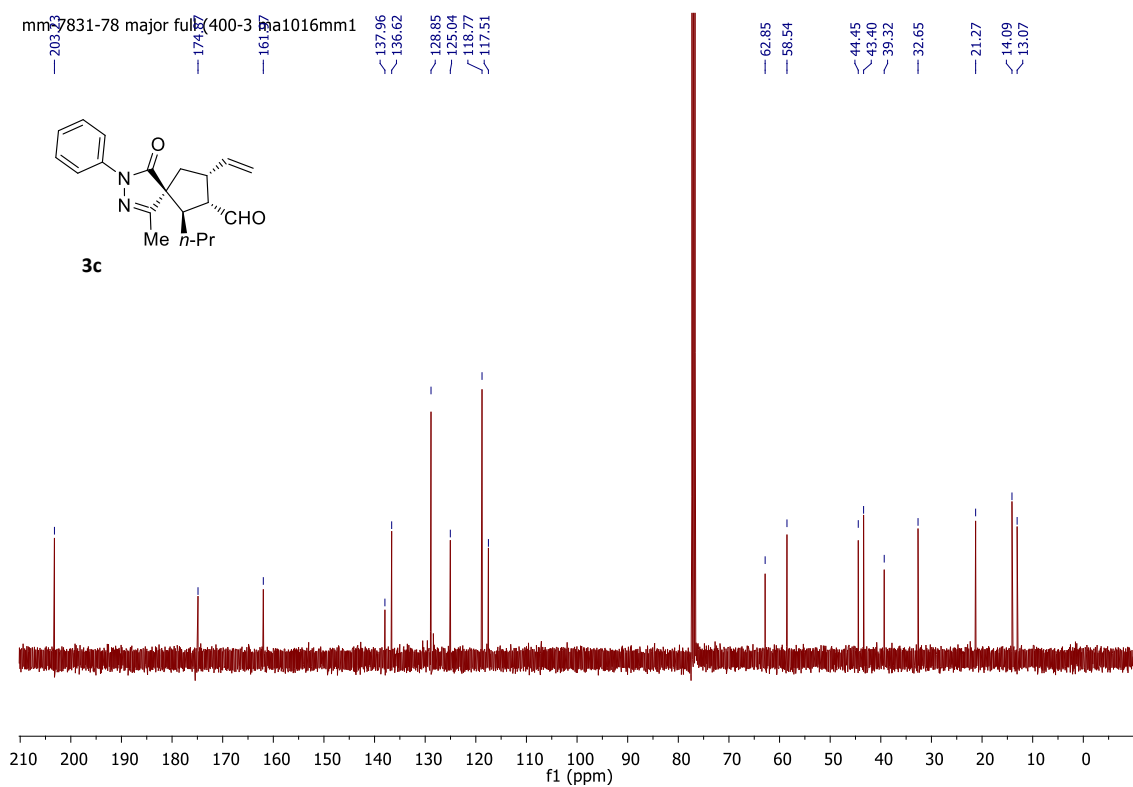

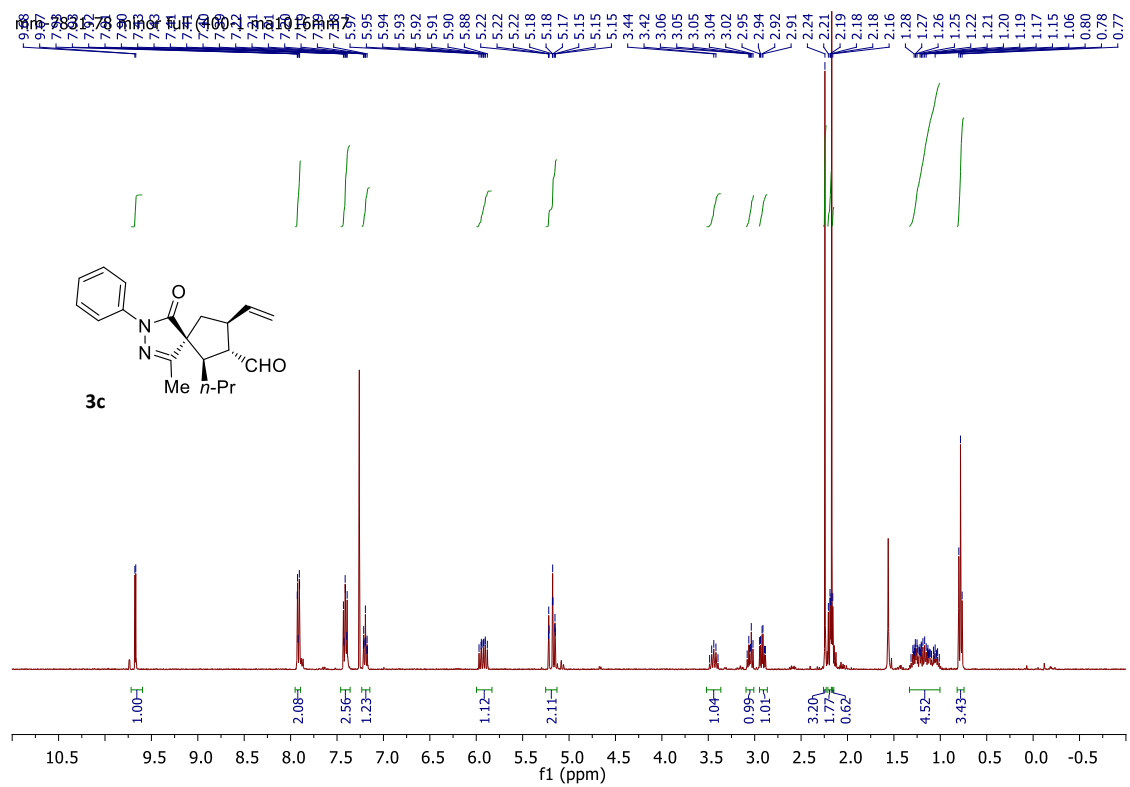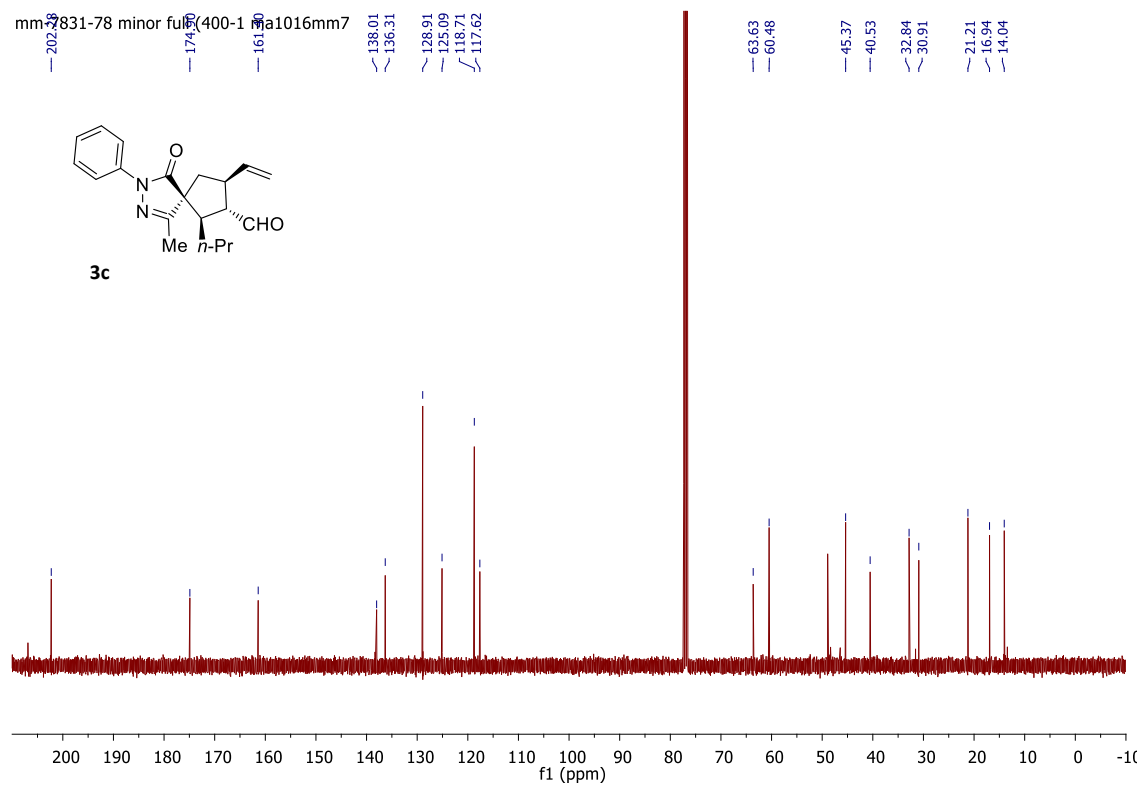

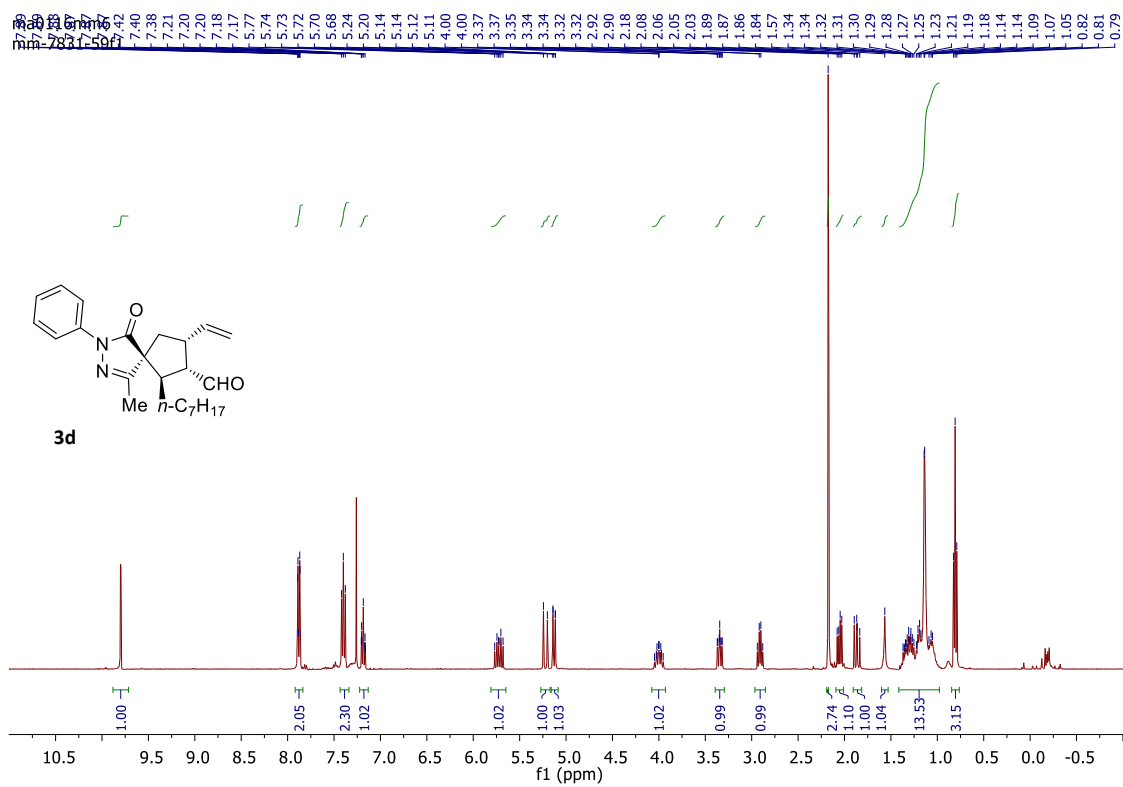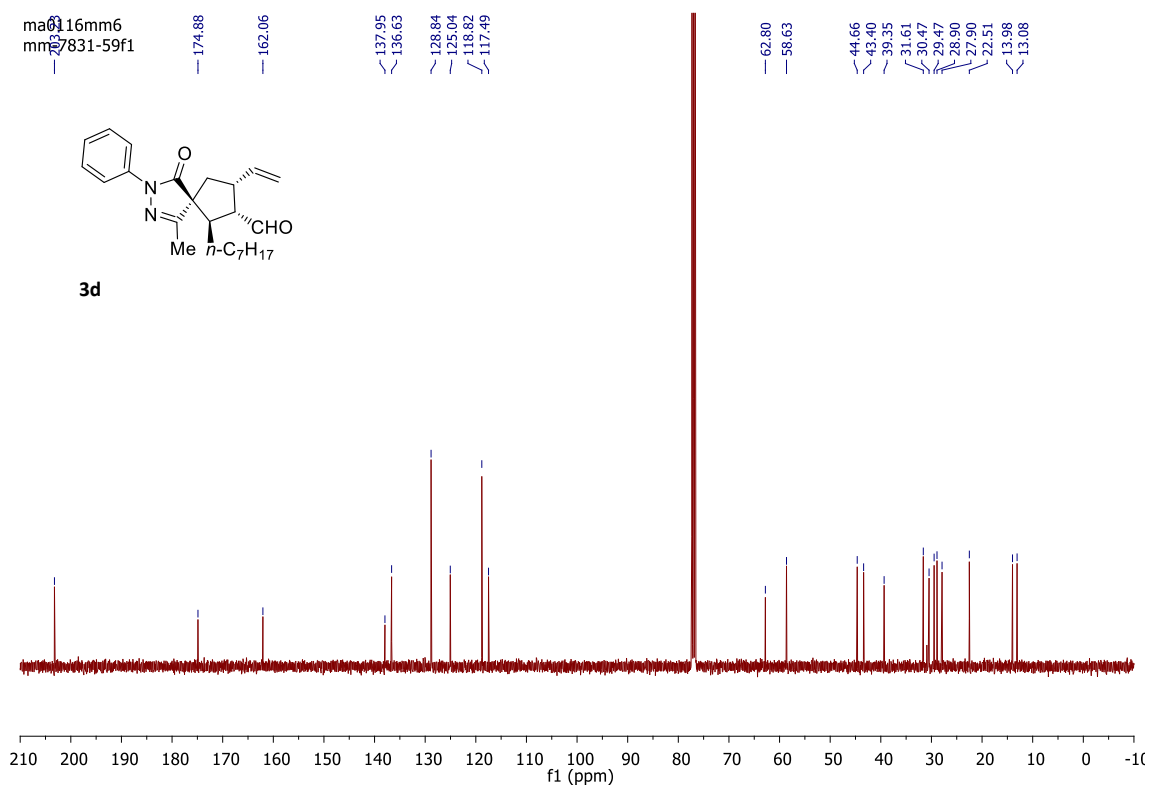



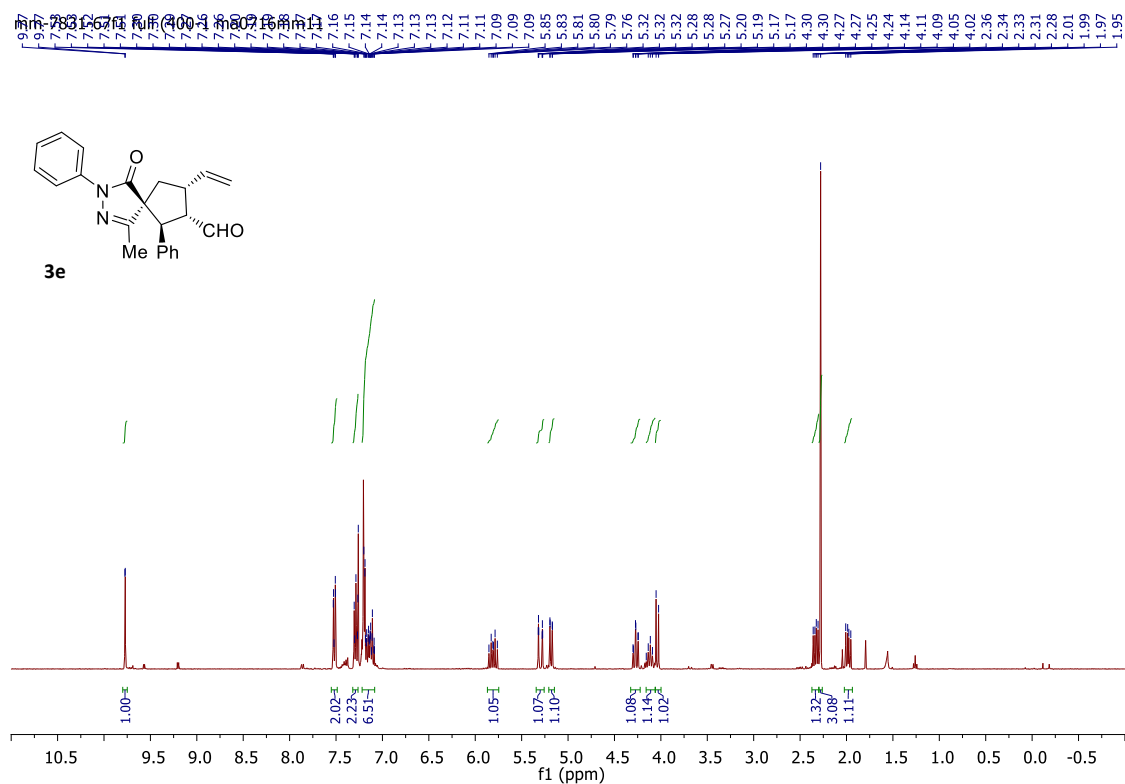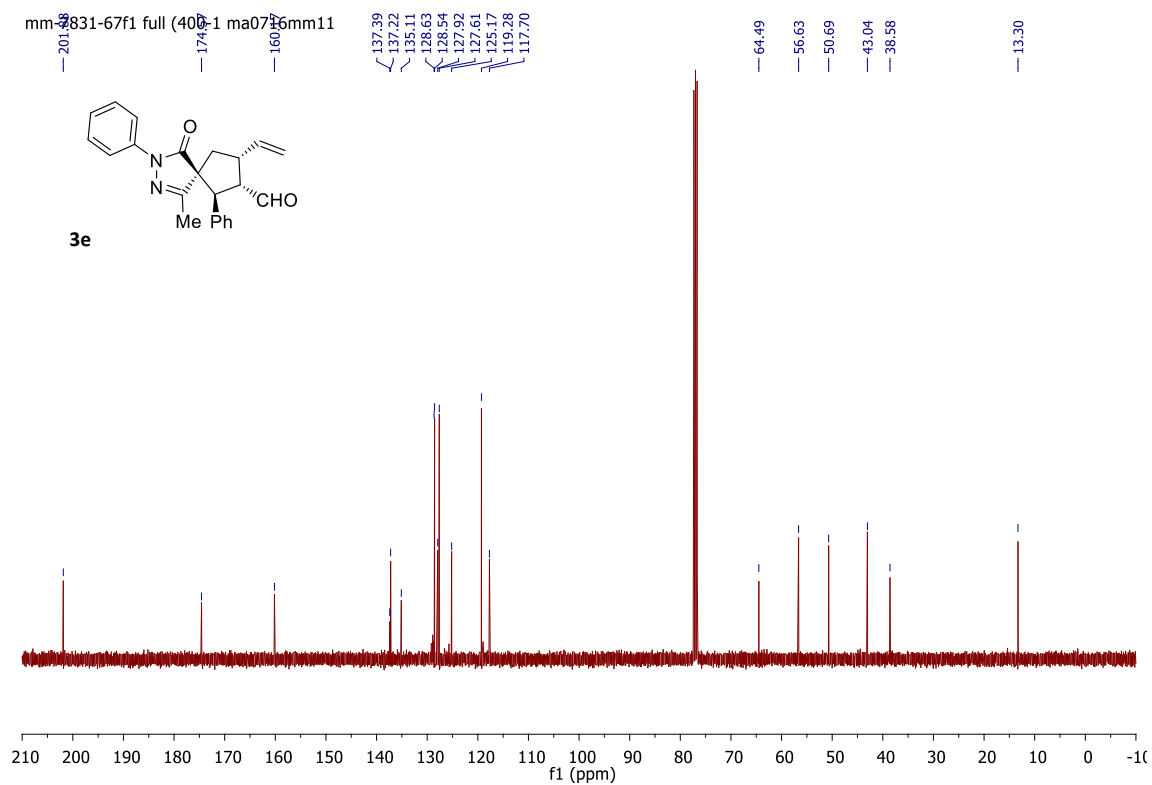

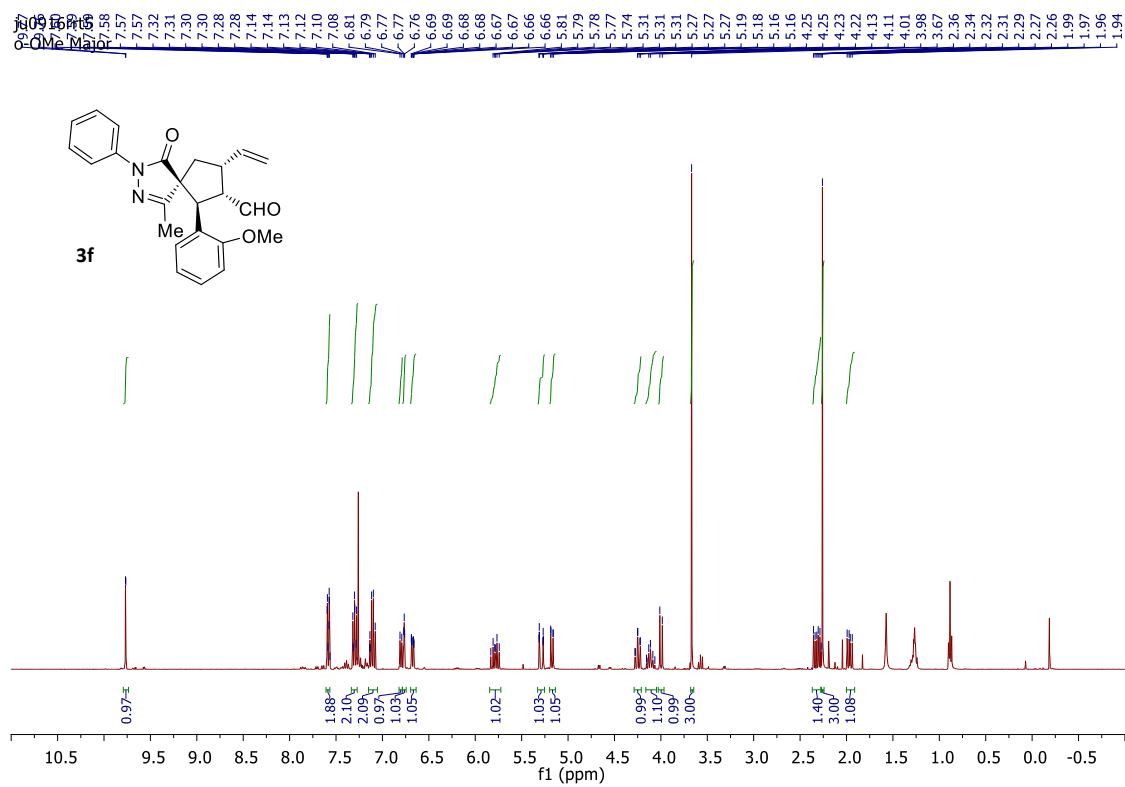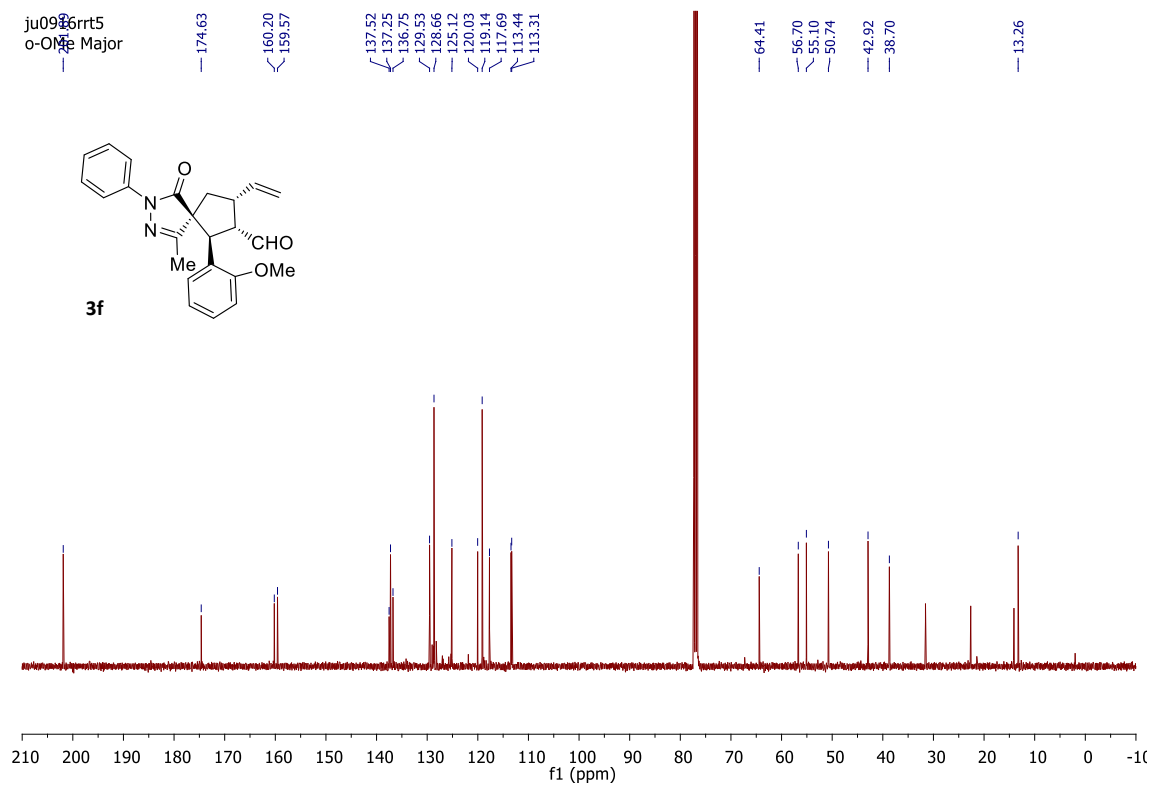

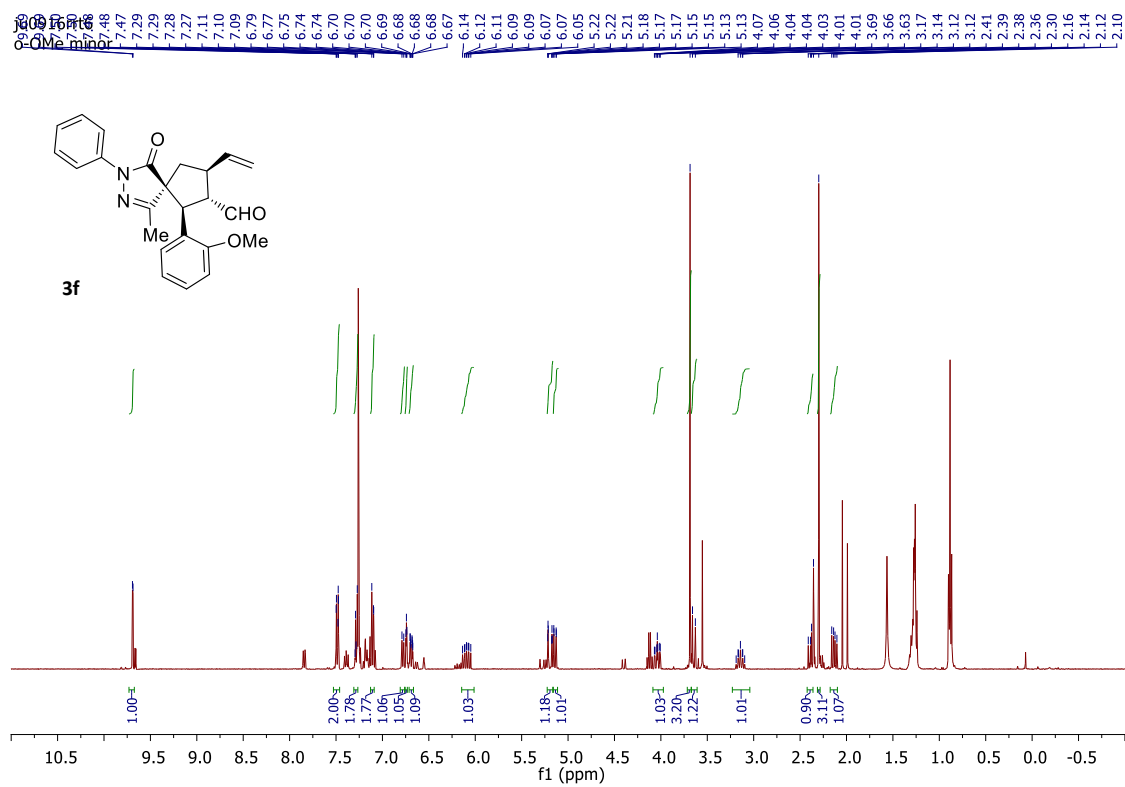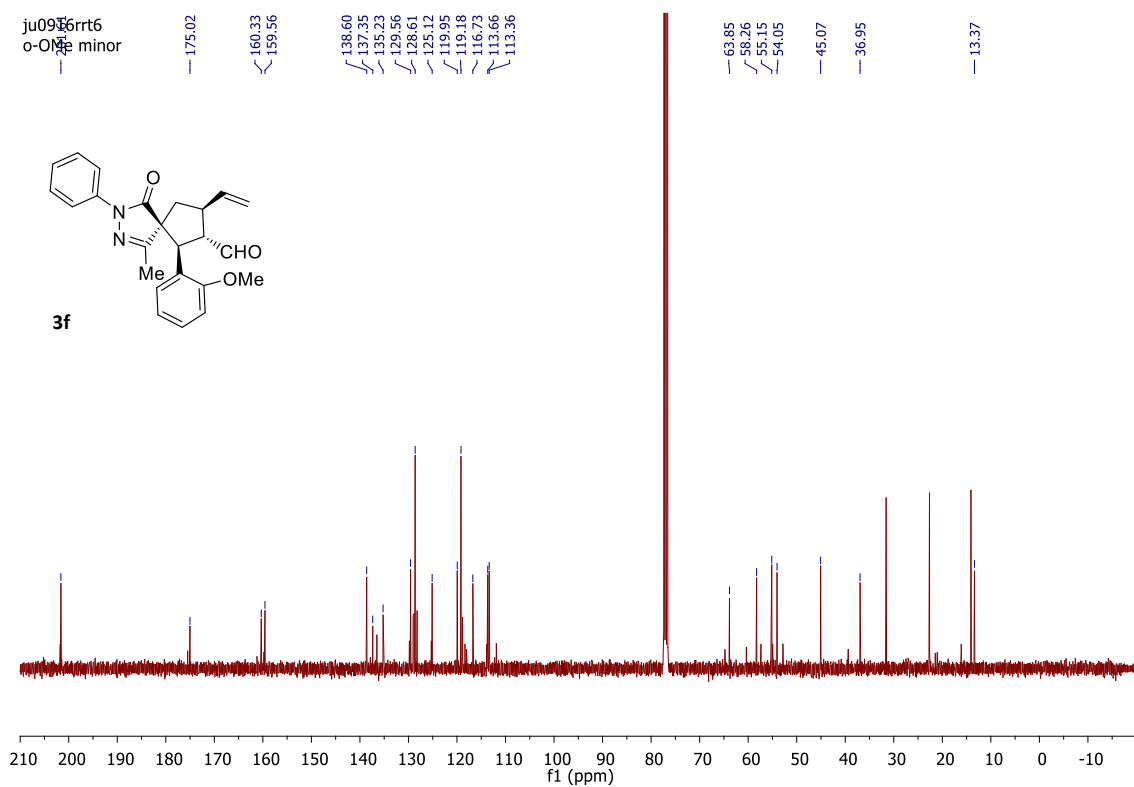

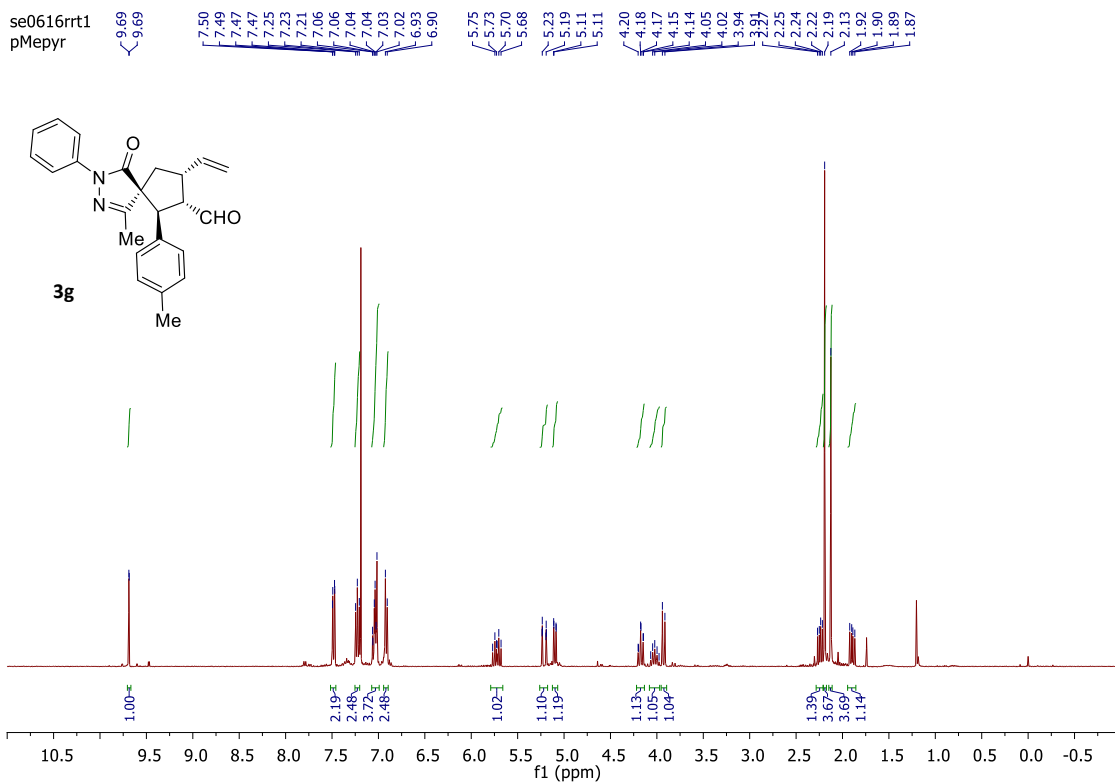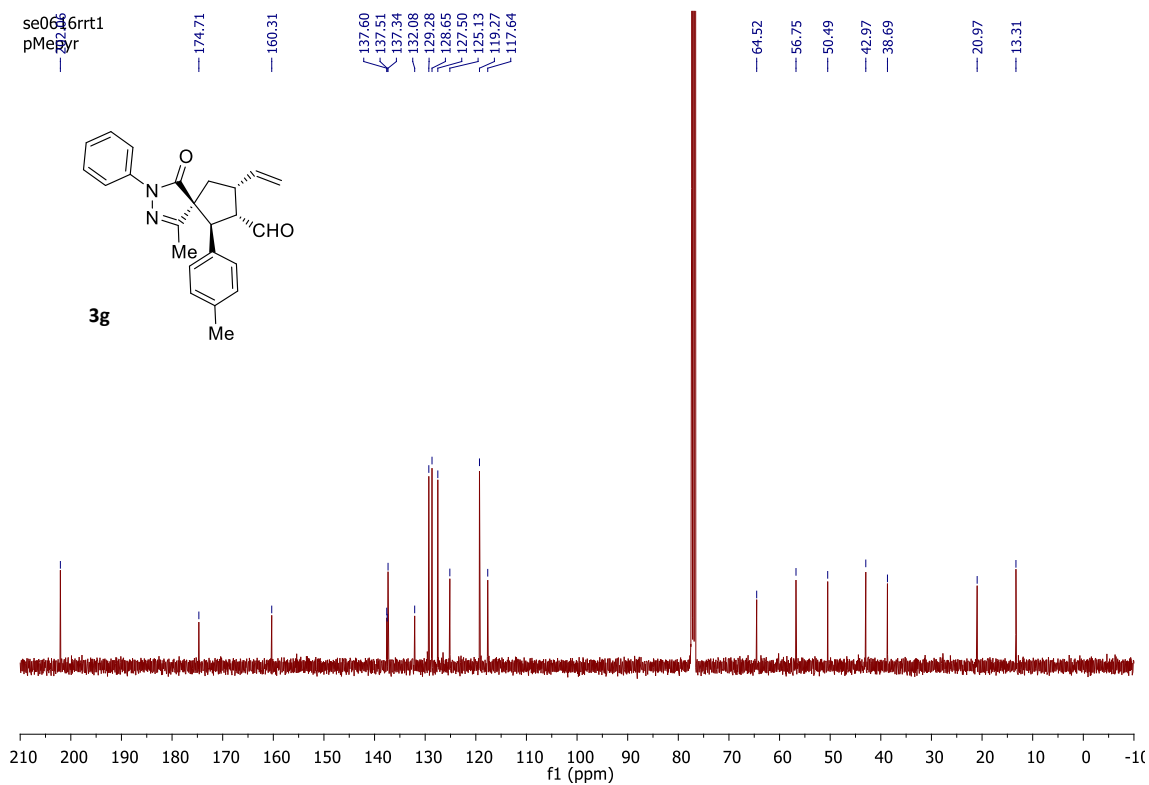

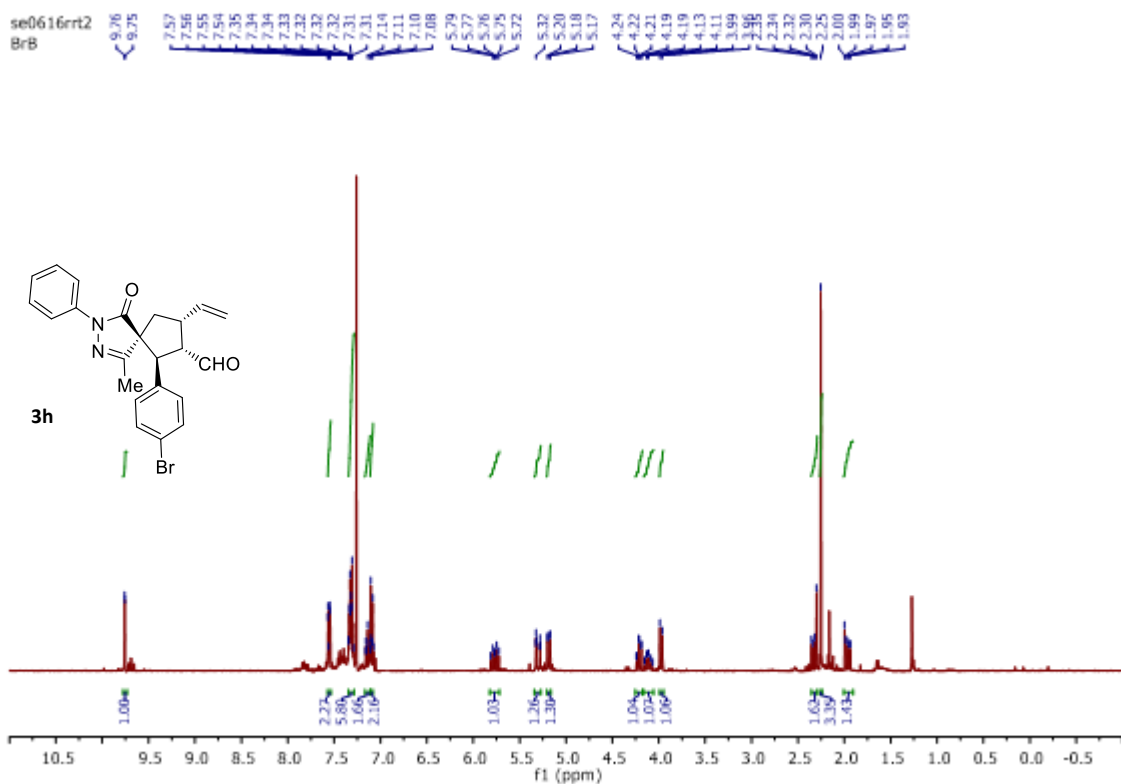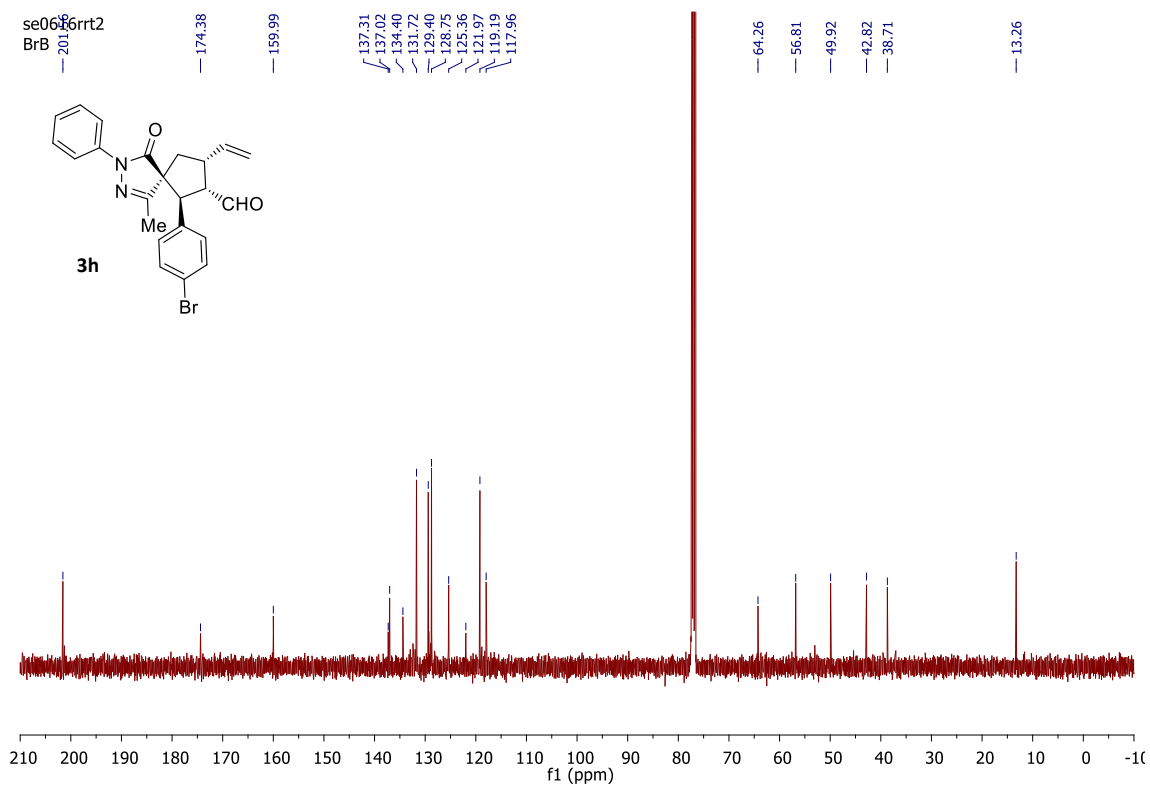

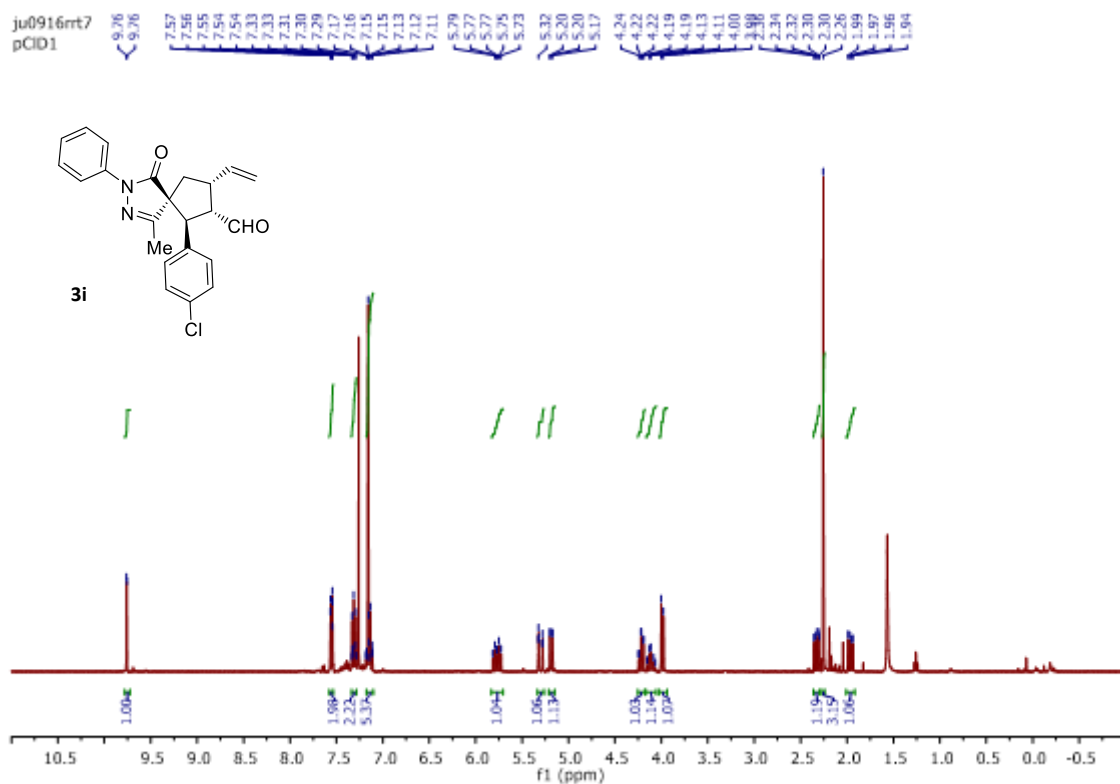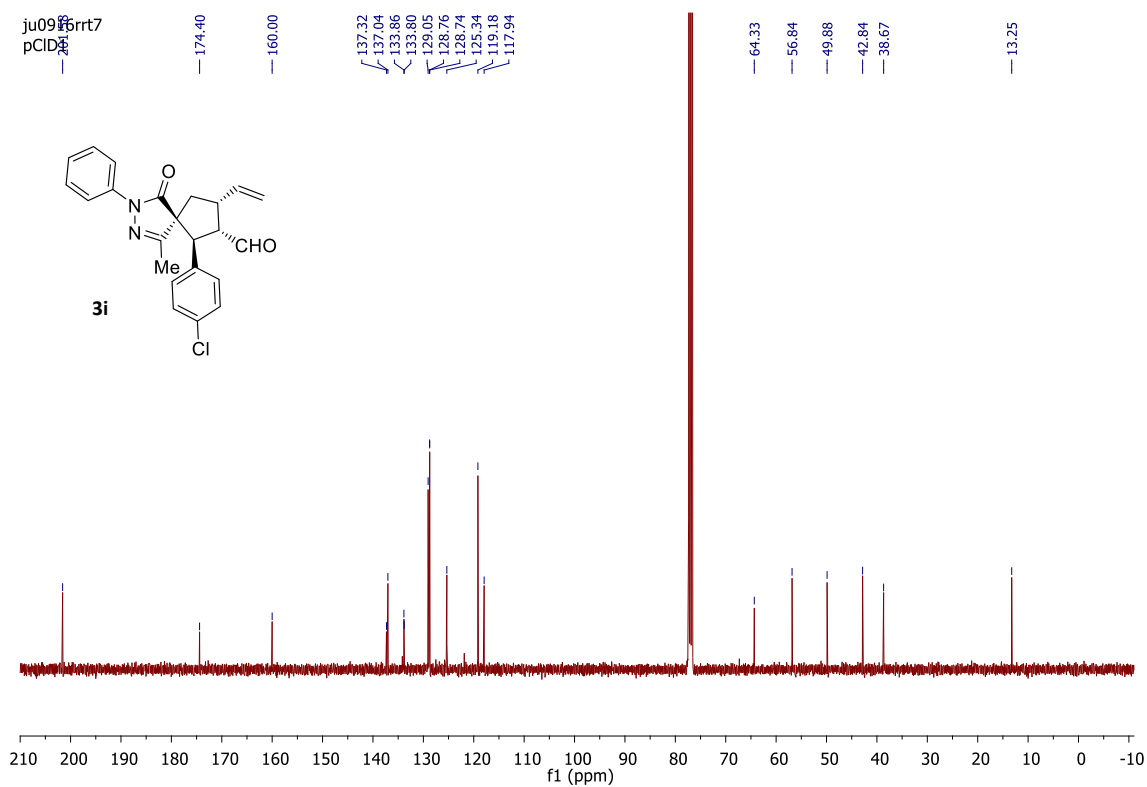

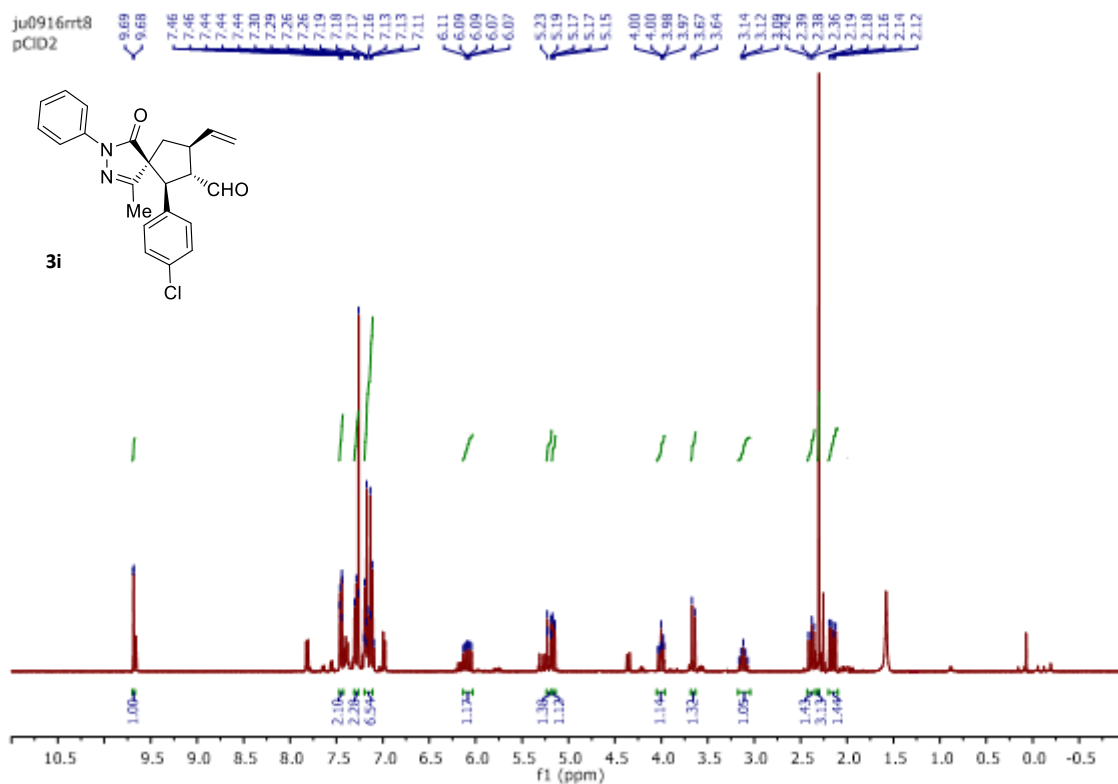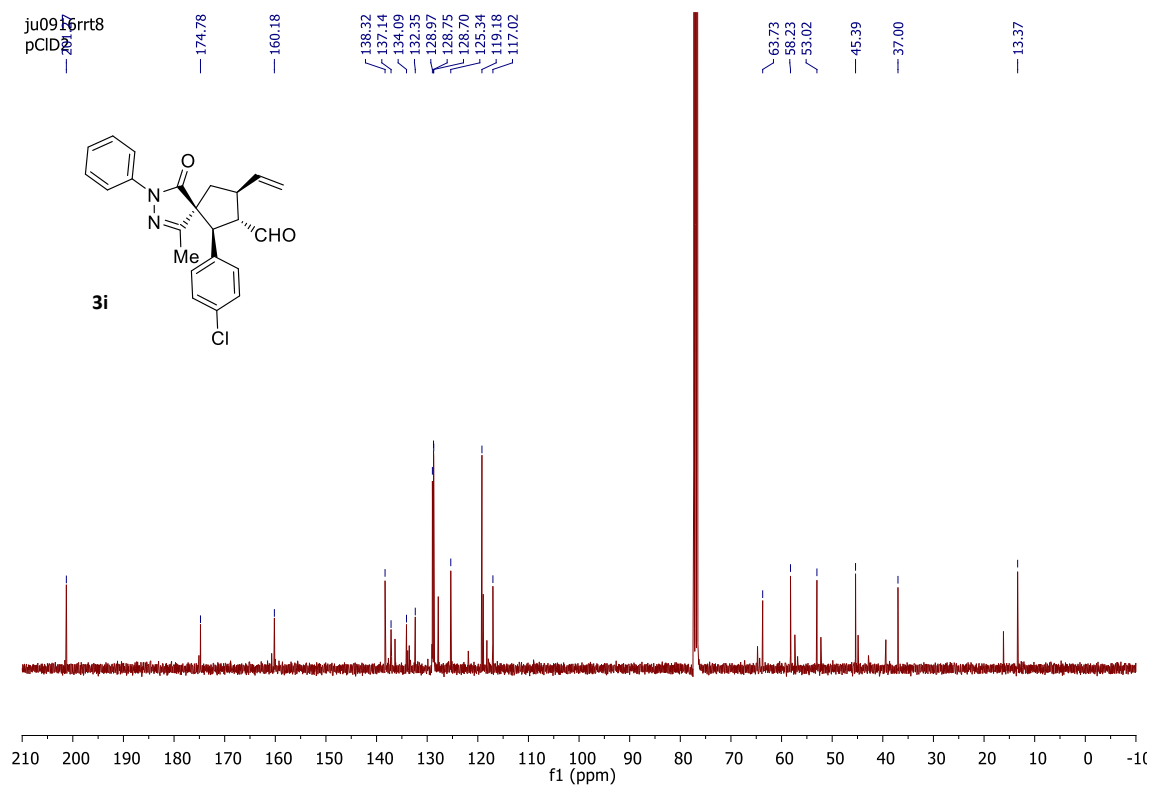

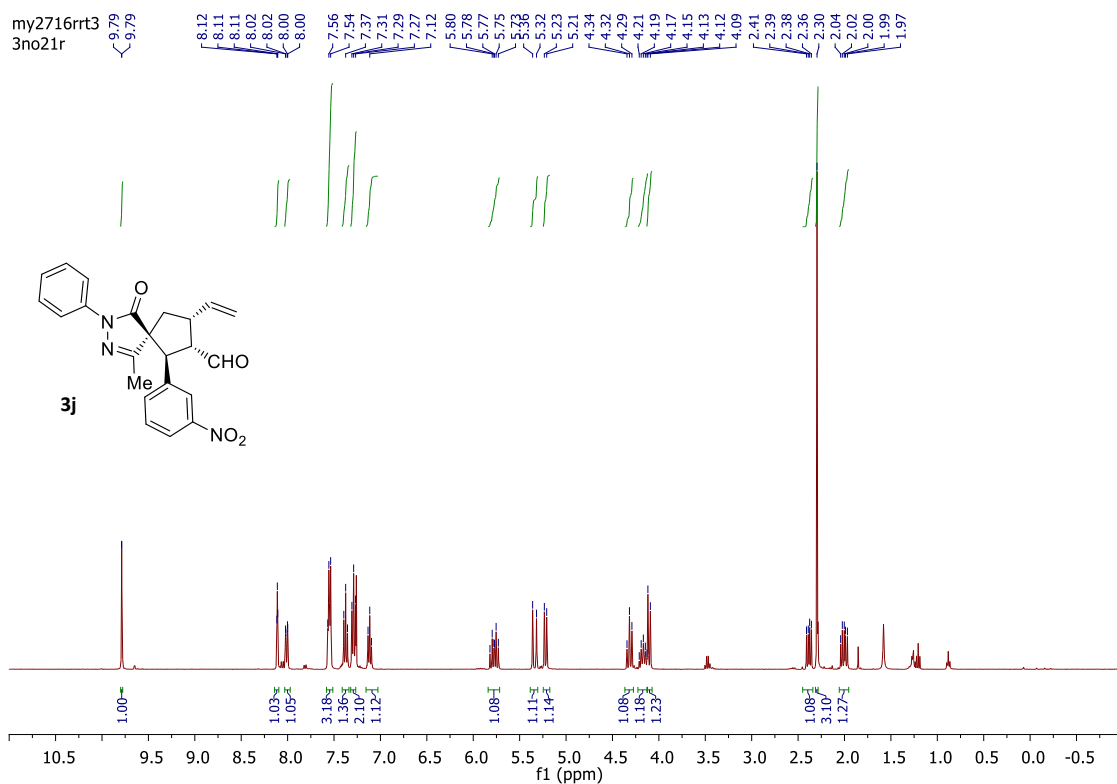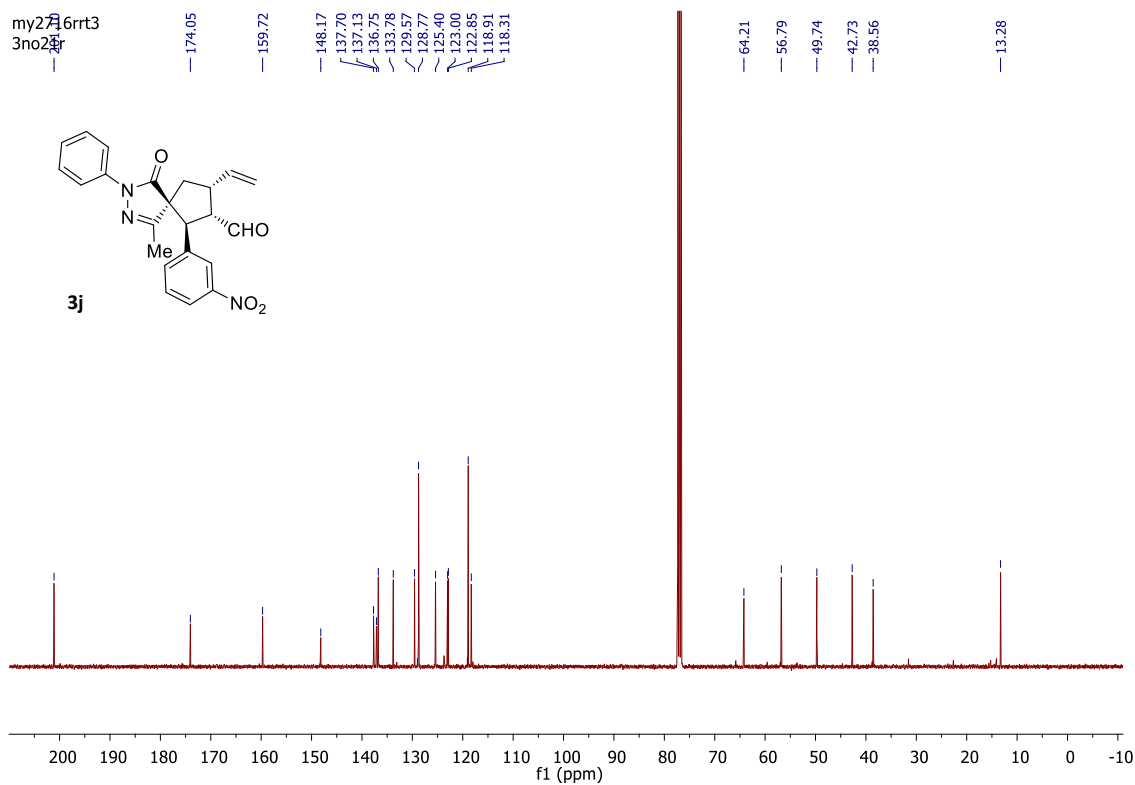



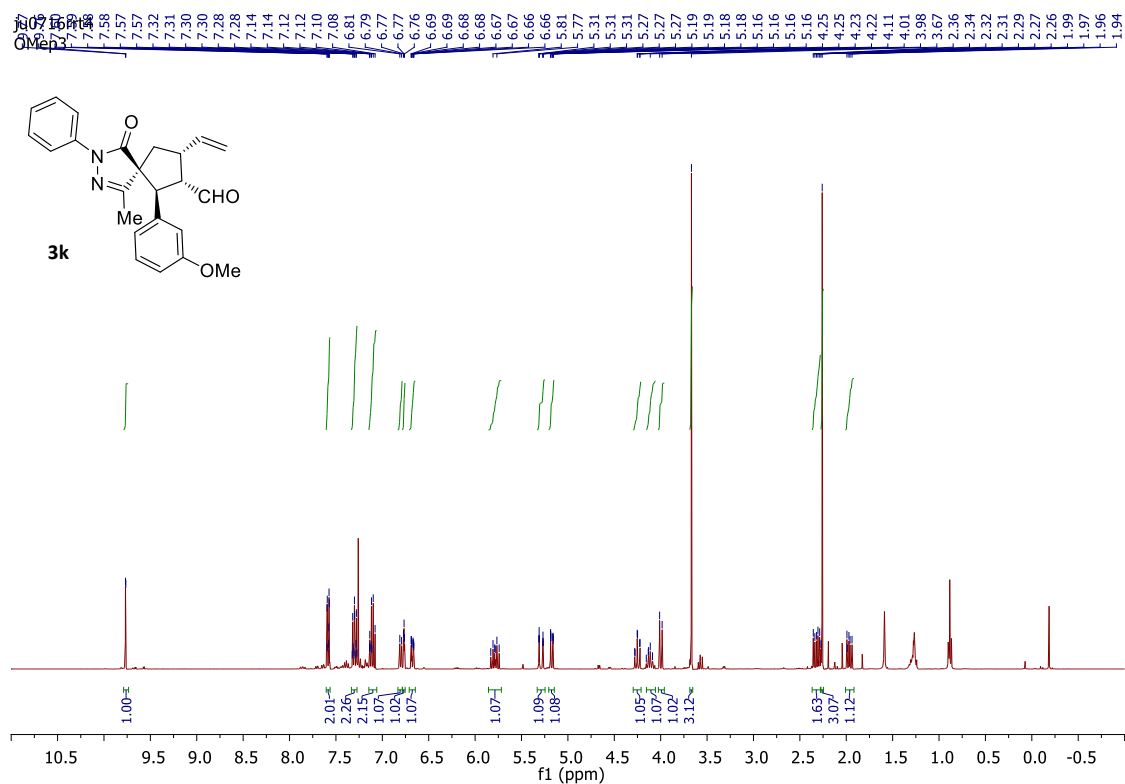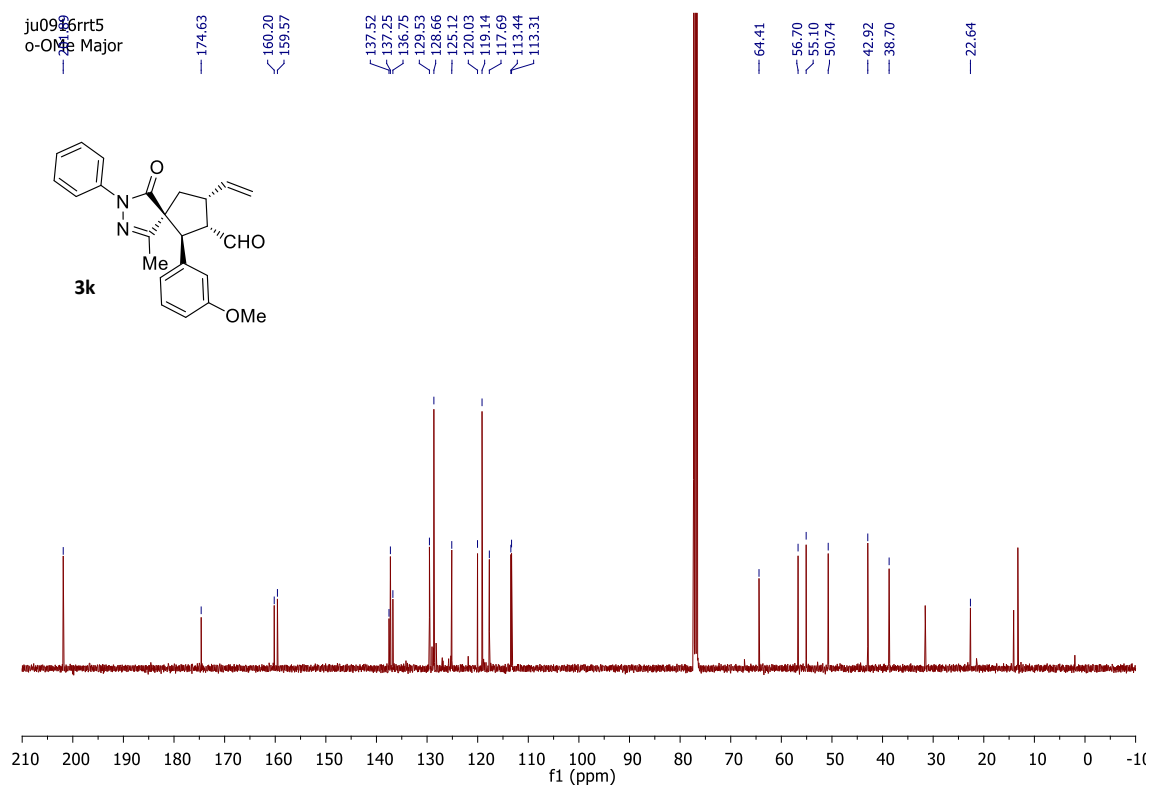

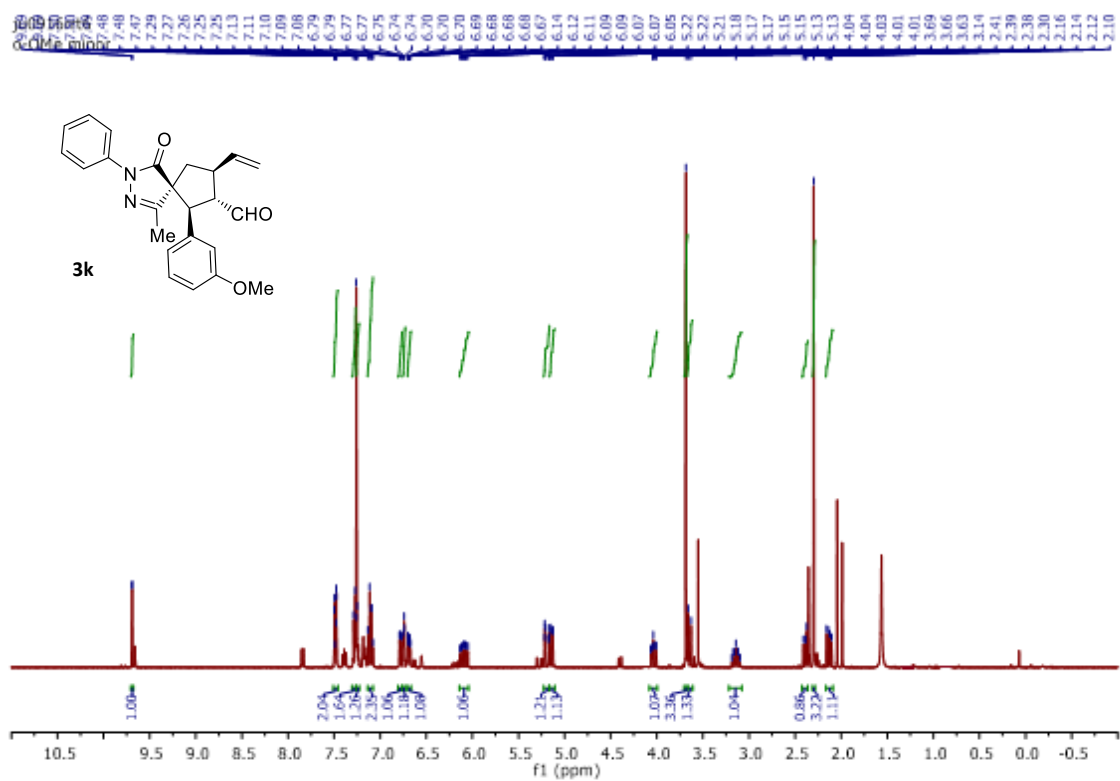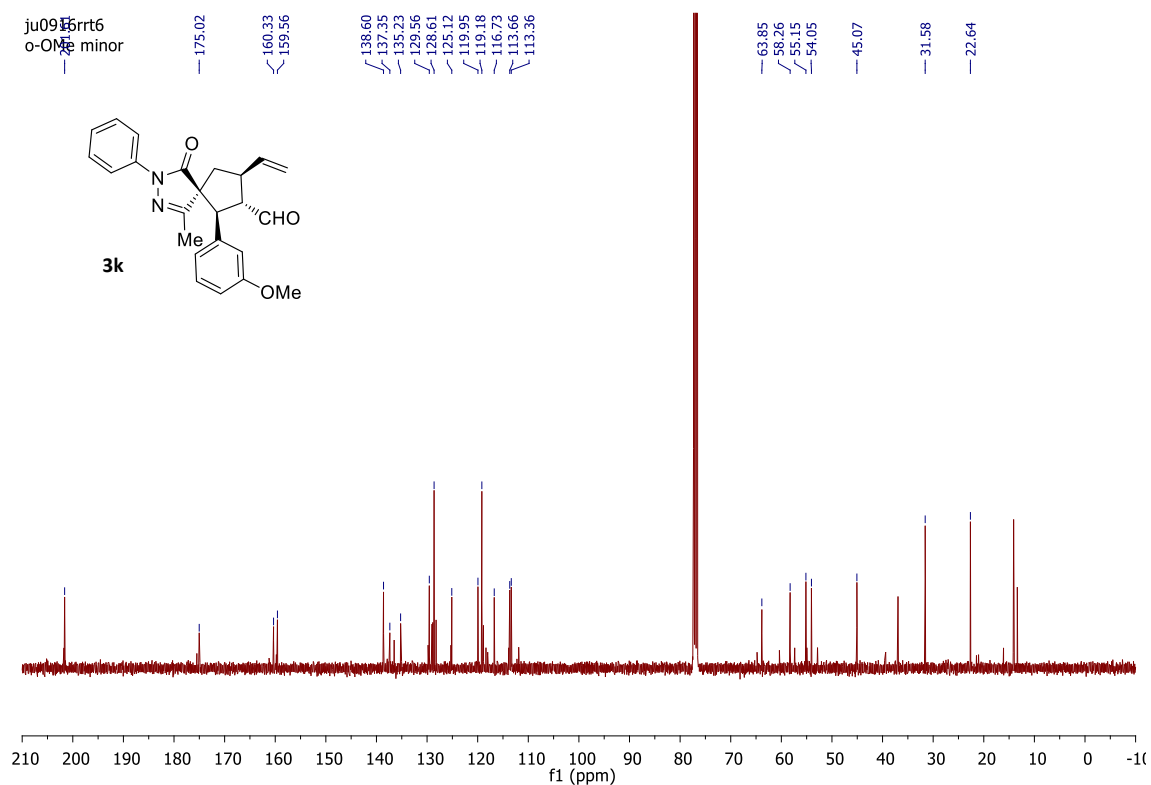

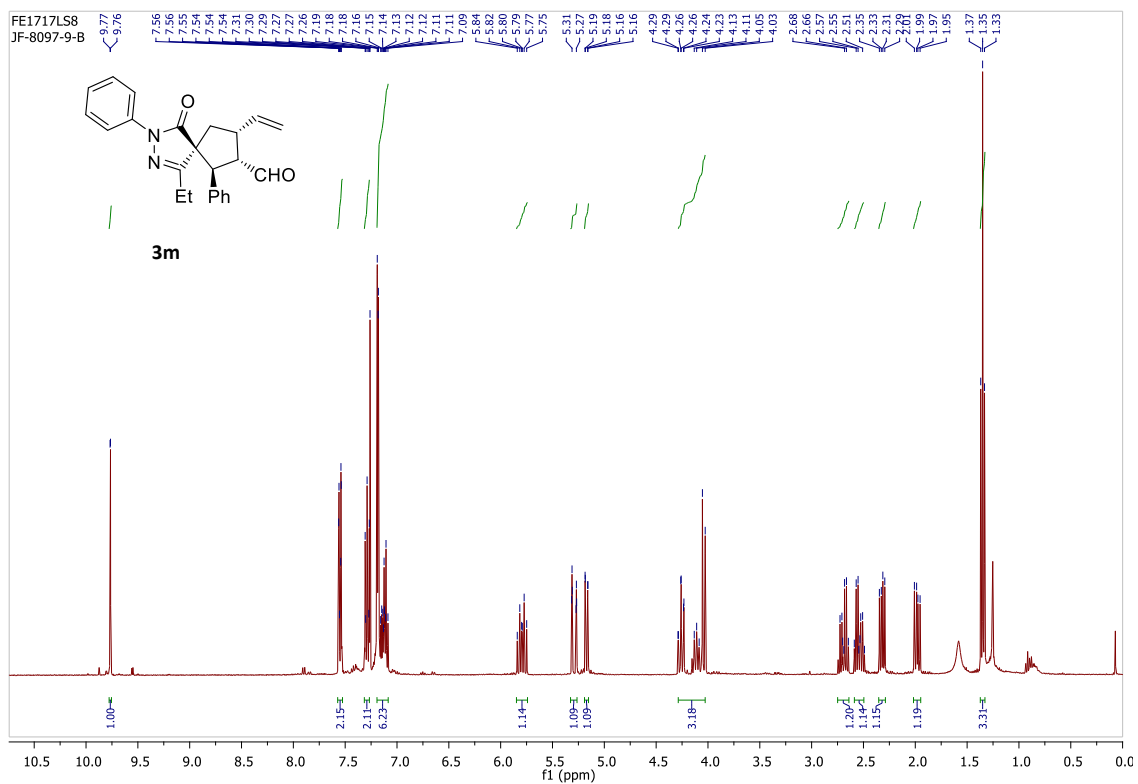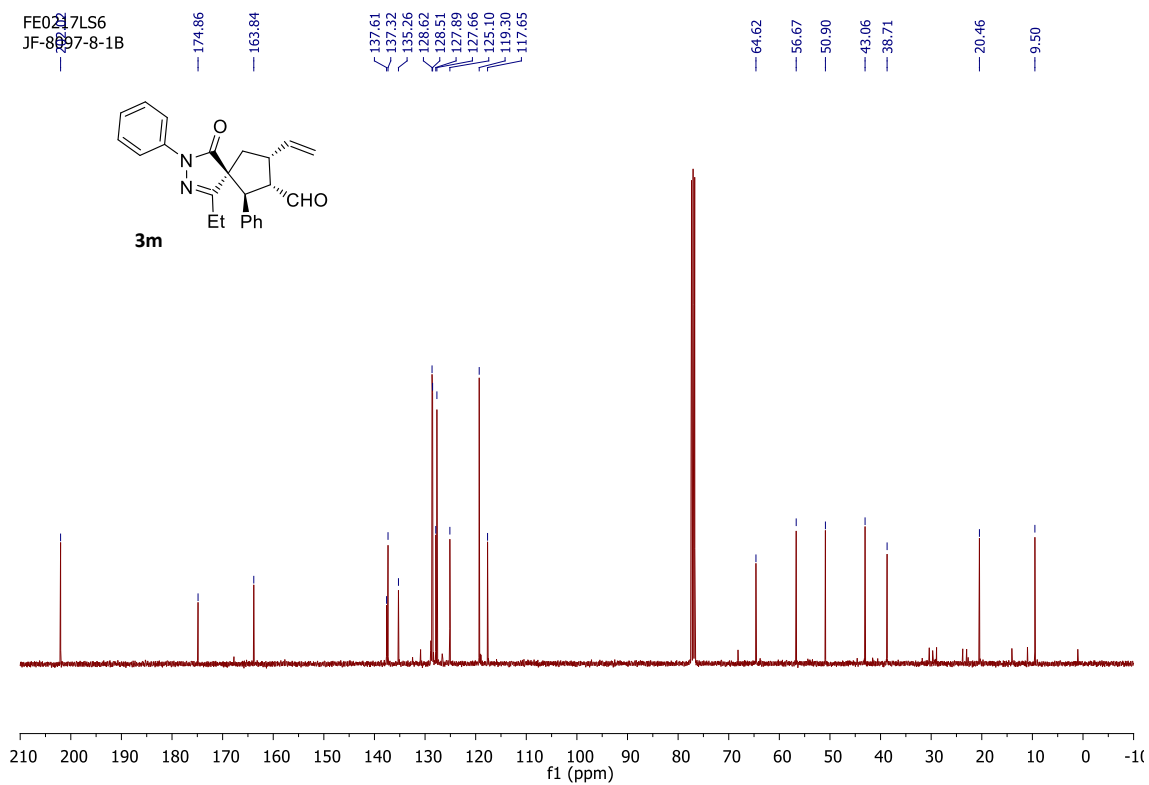

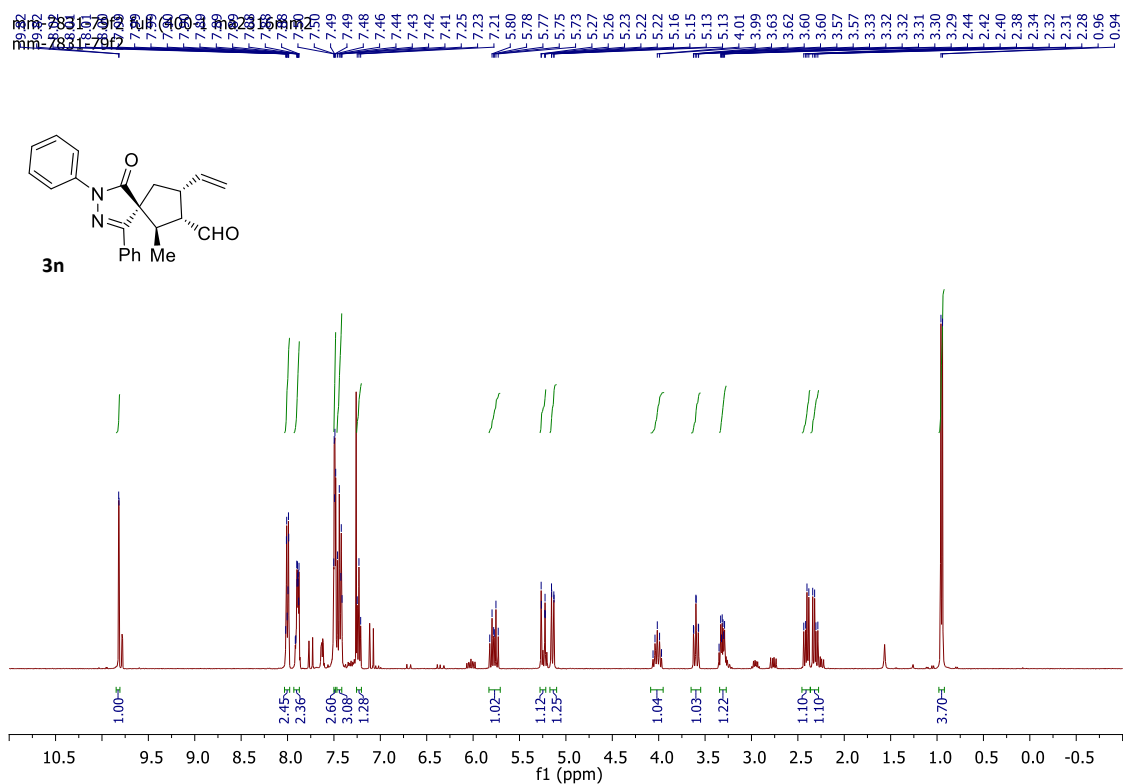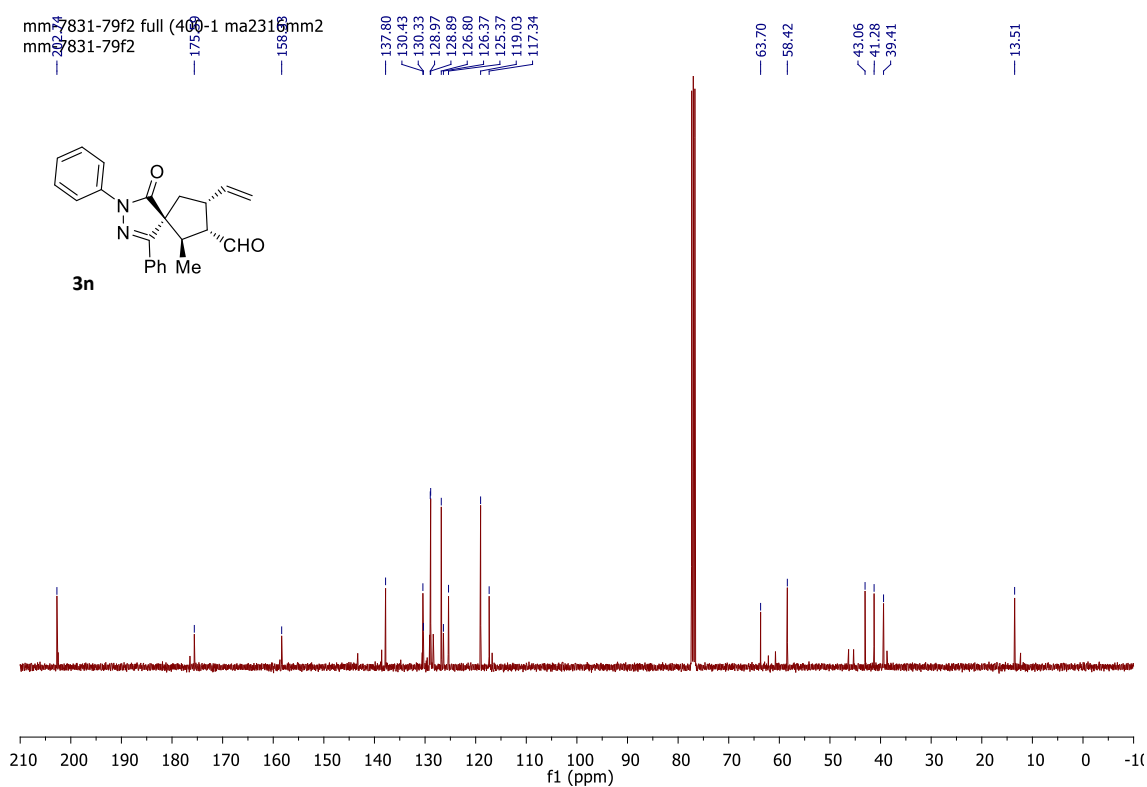

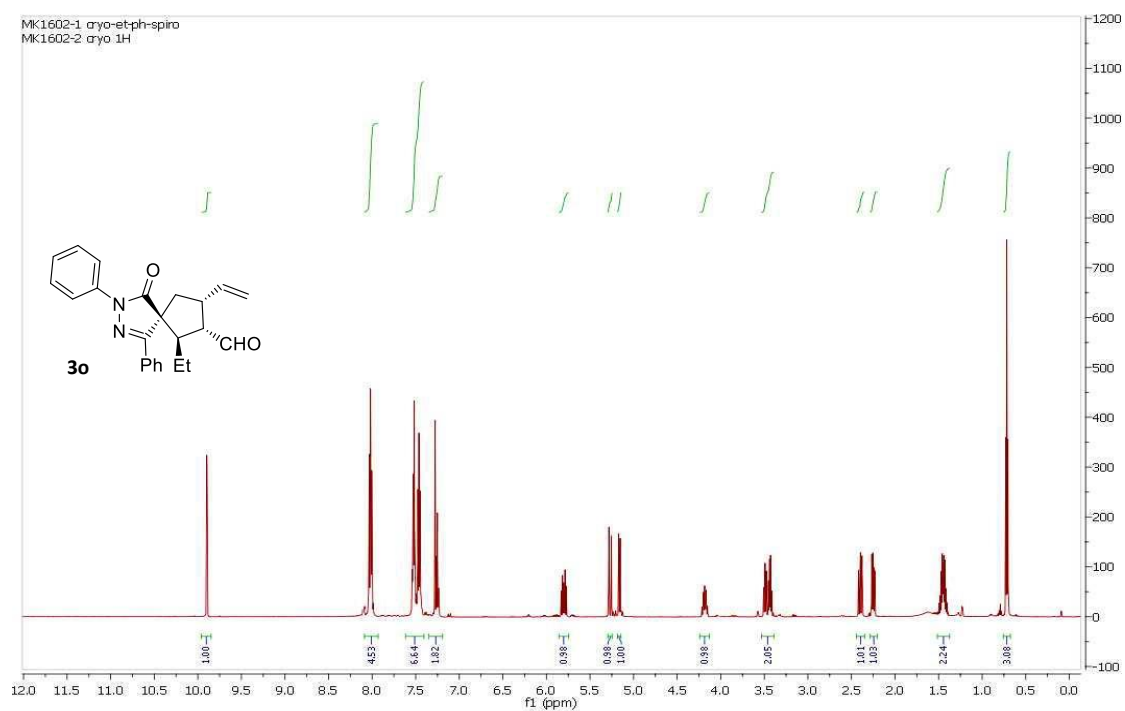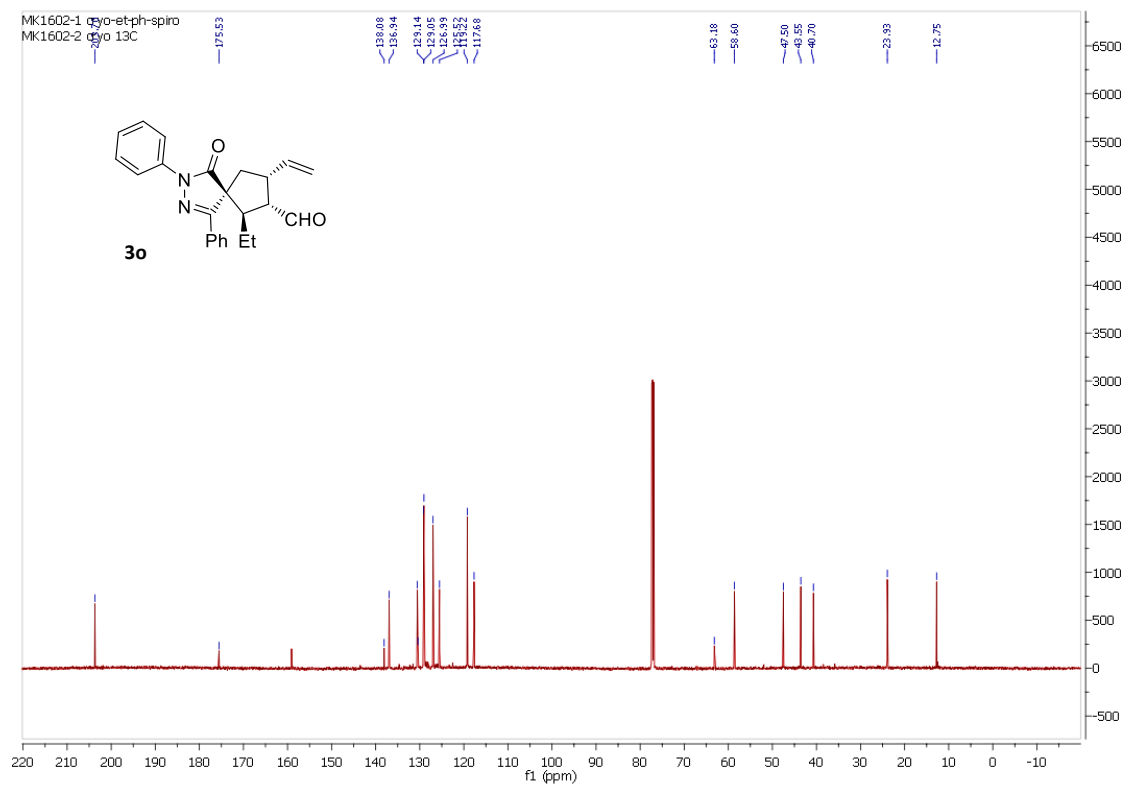

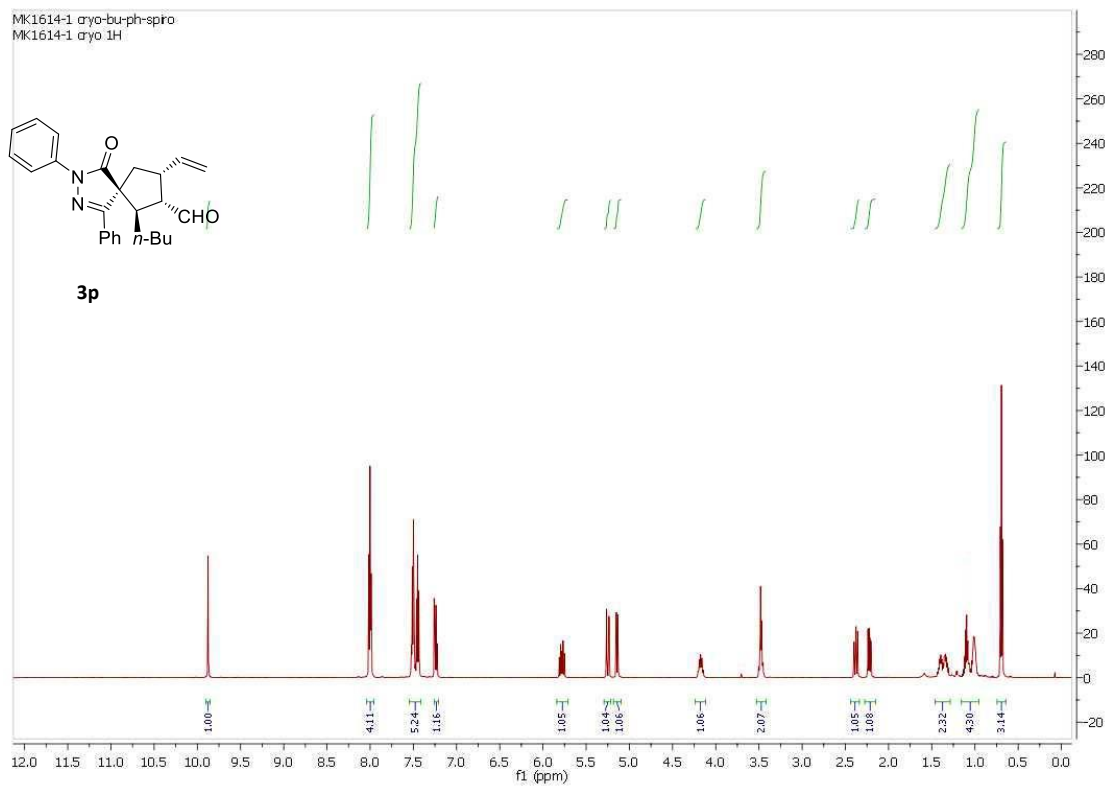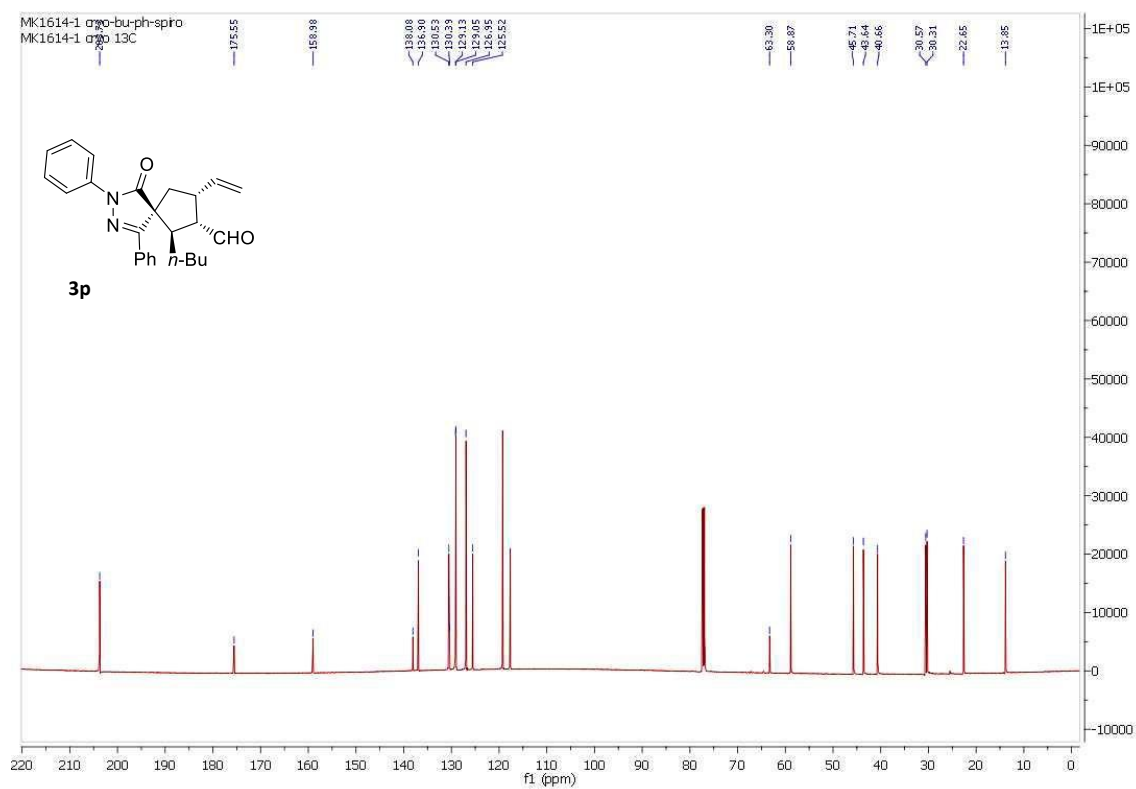

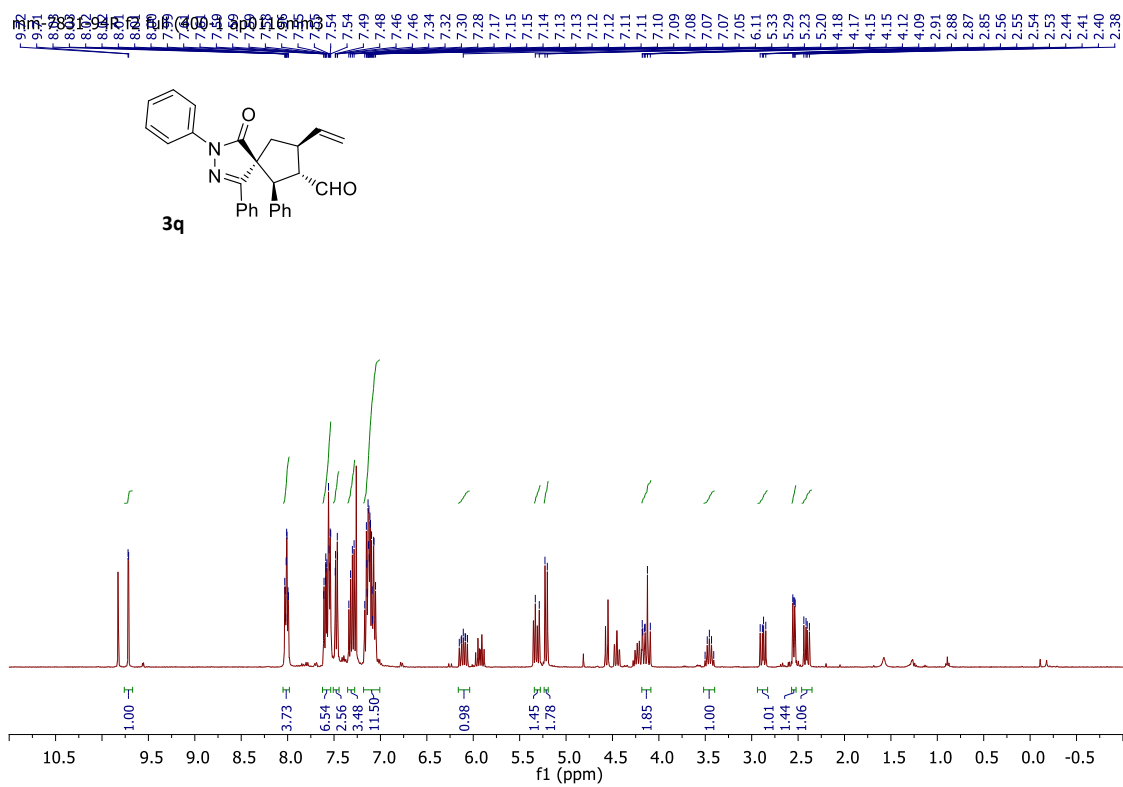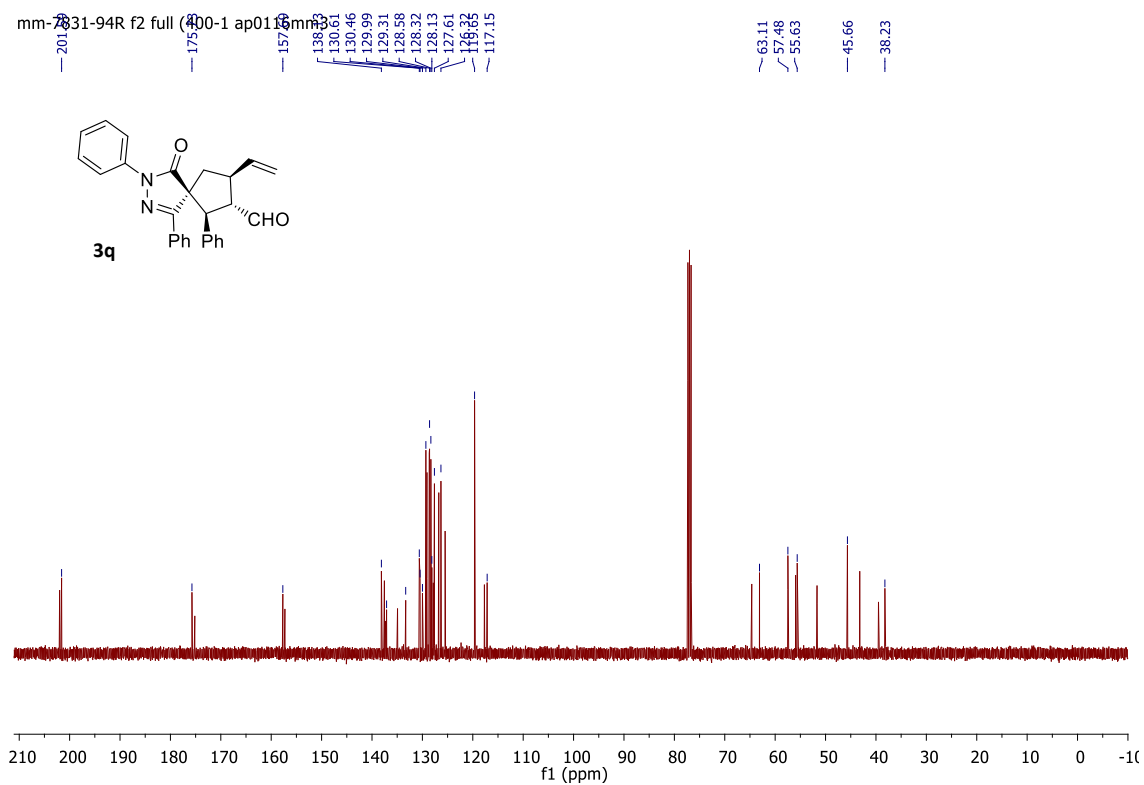

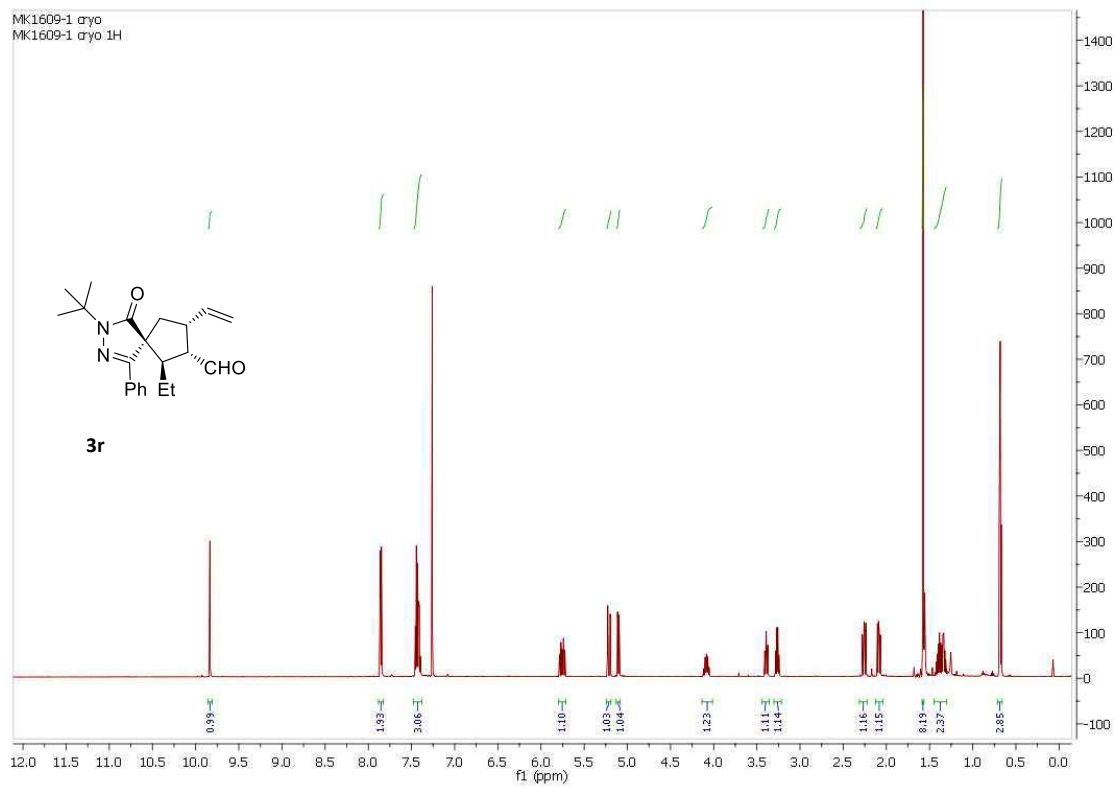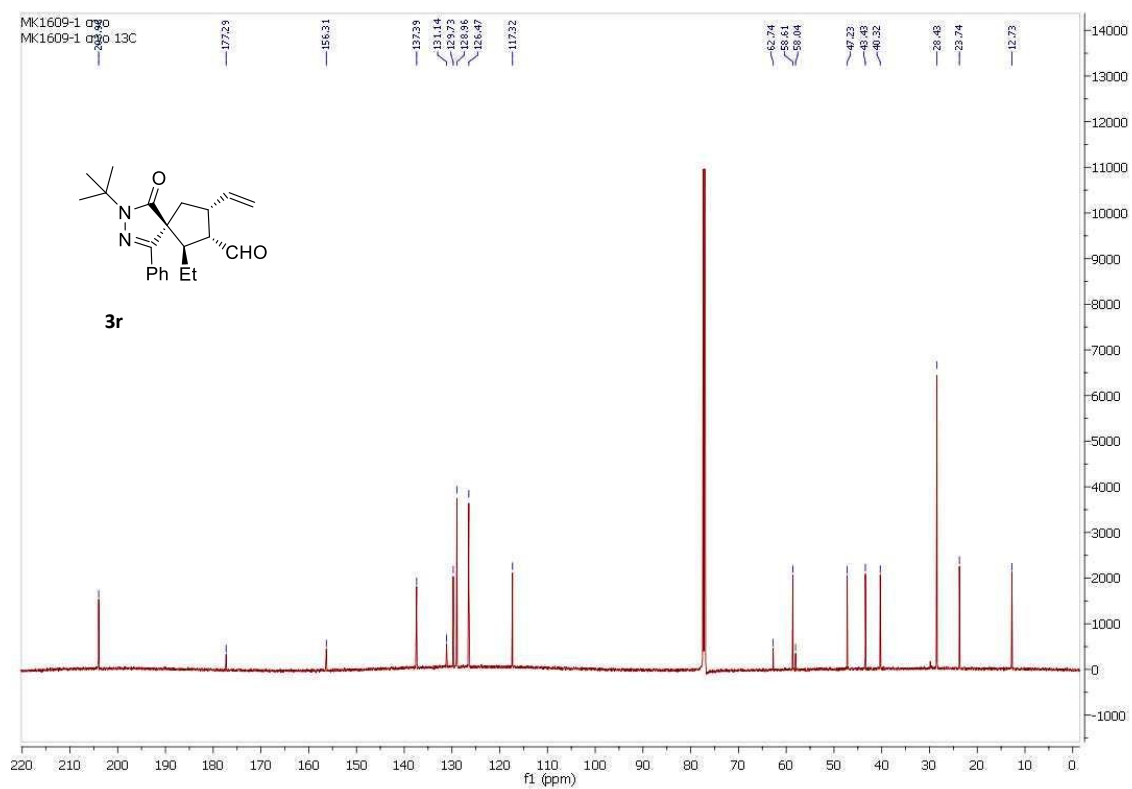



MK1608-2-2-ph-tert-bu-spiro,1.fid

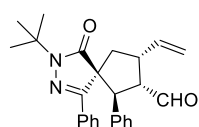

3s

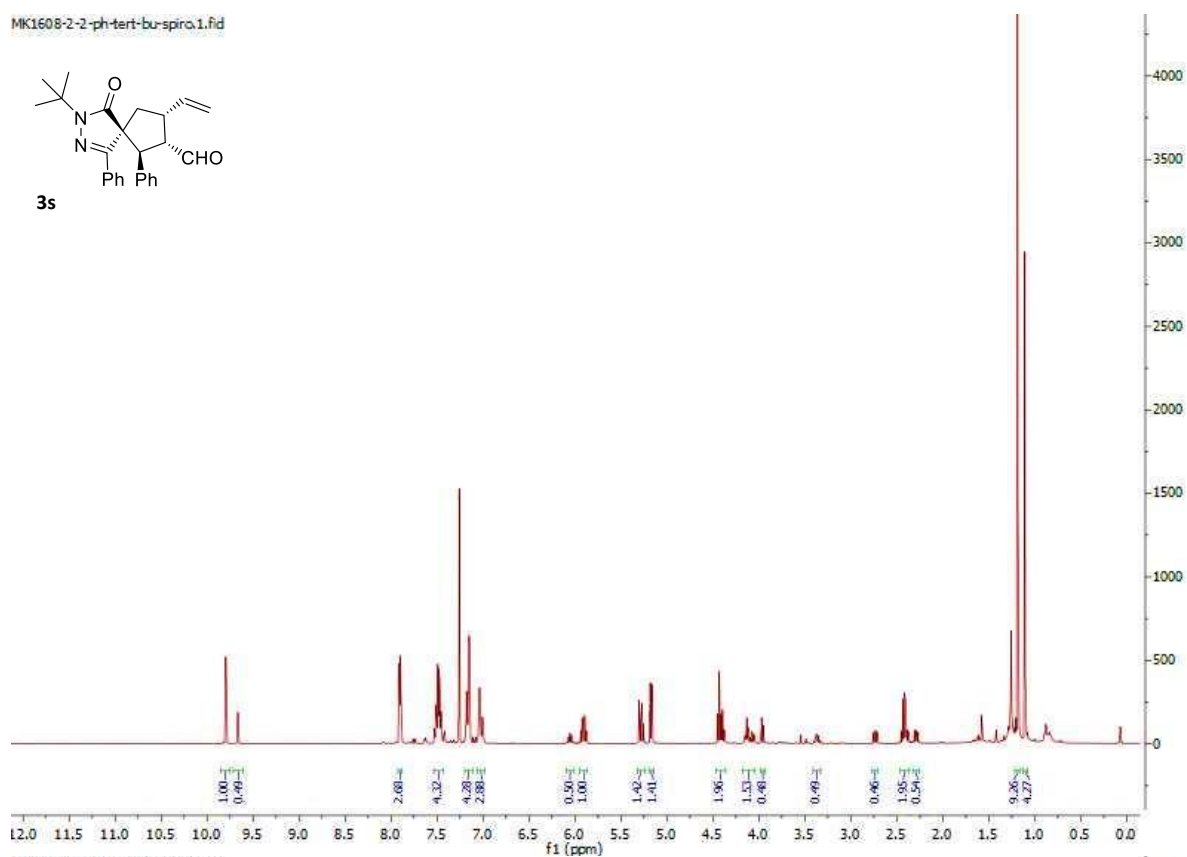

MK1608-2-2-ph-tert-bu-spiro,2.fid

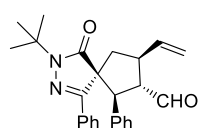

3s

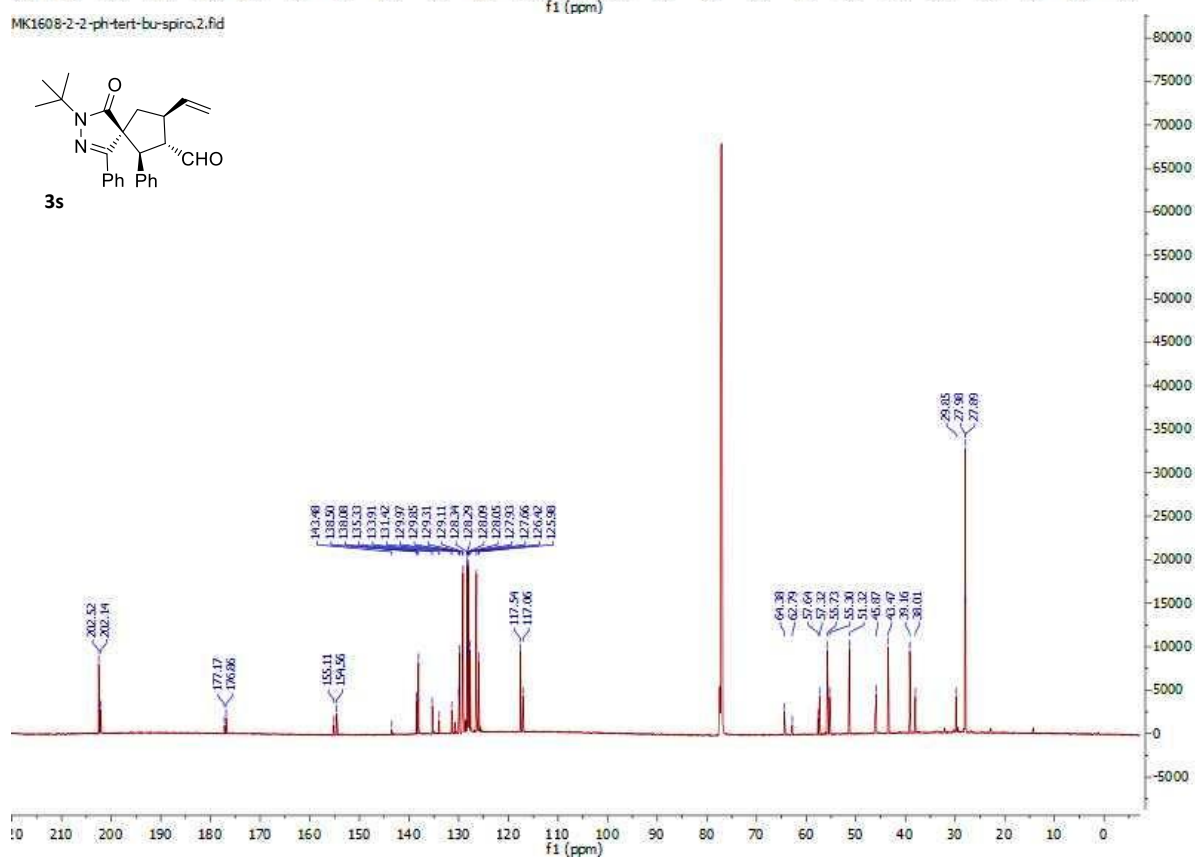

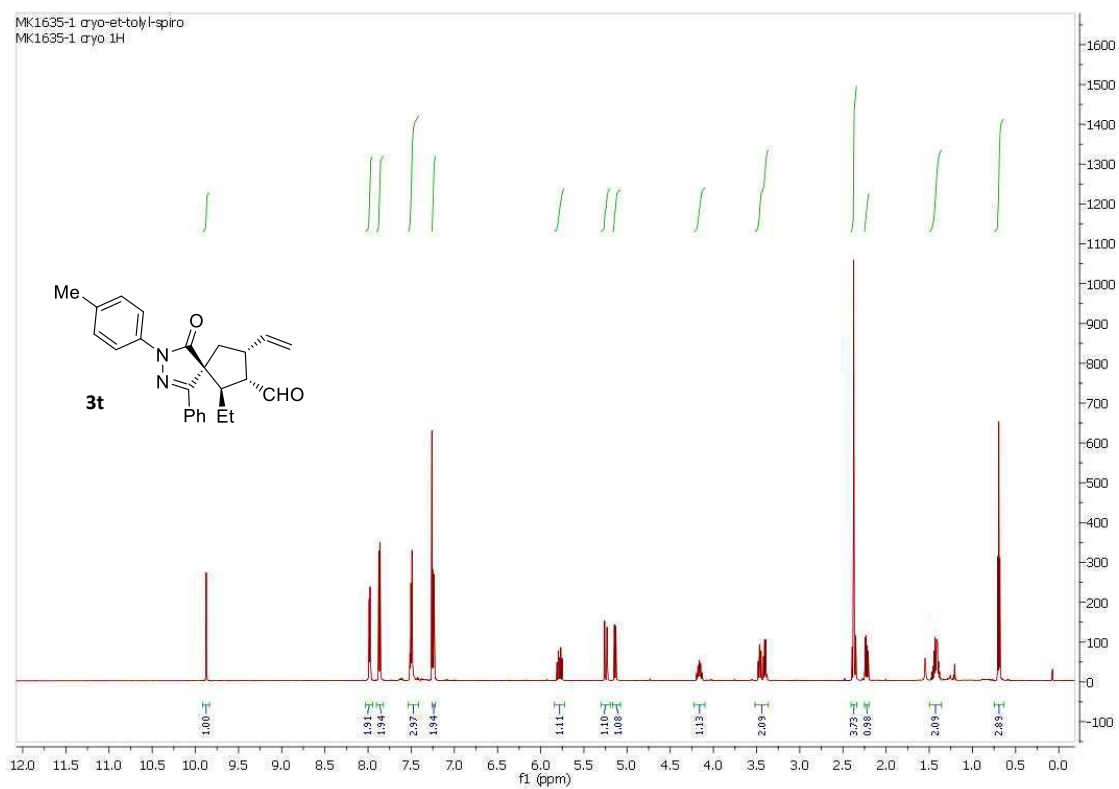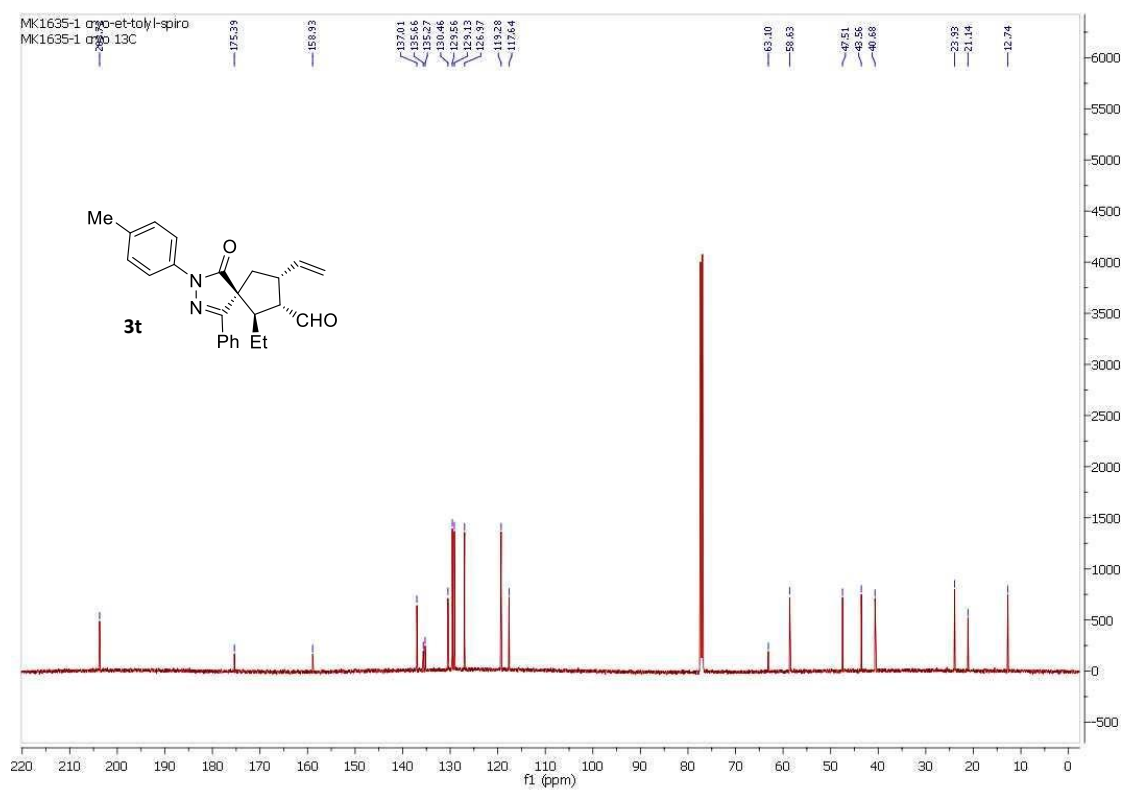

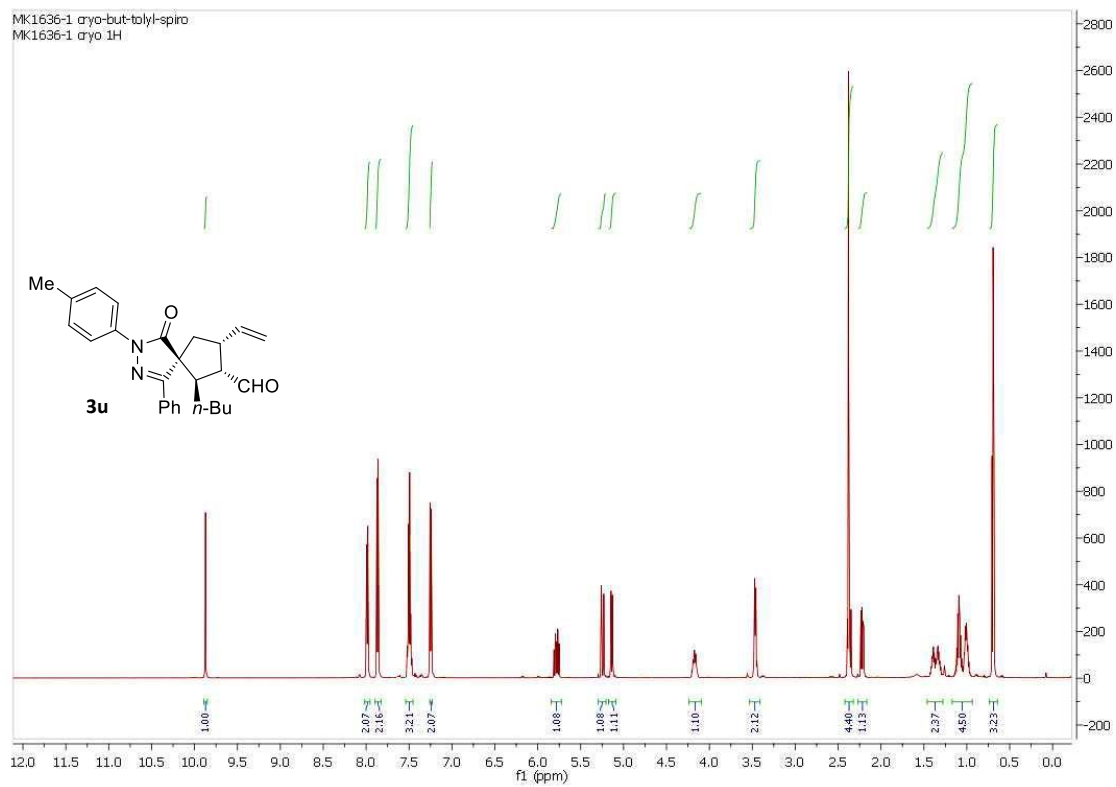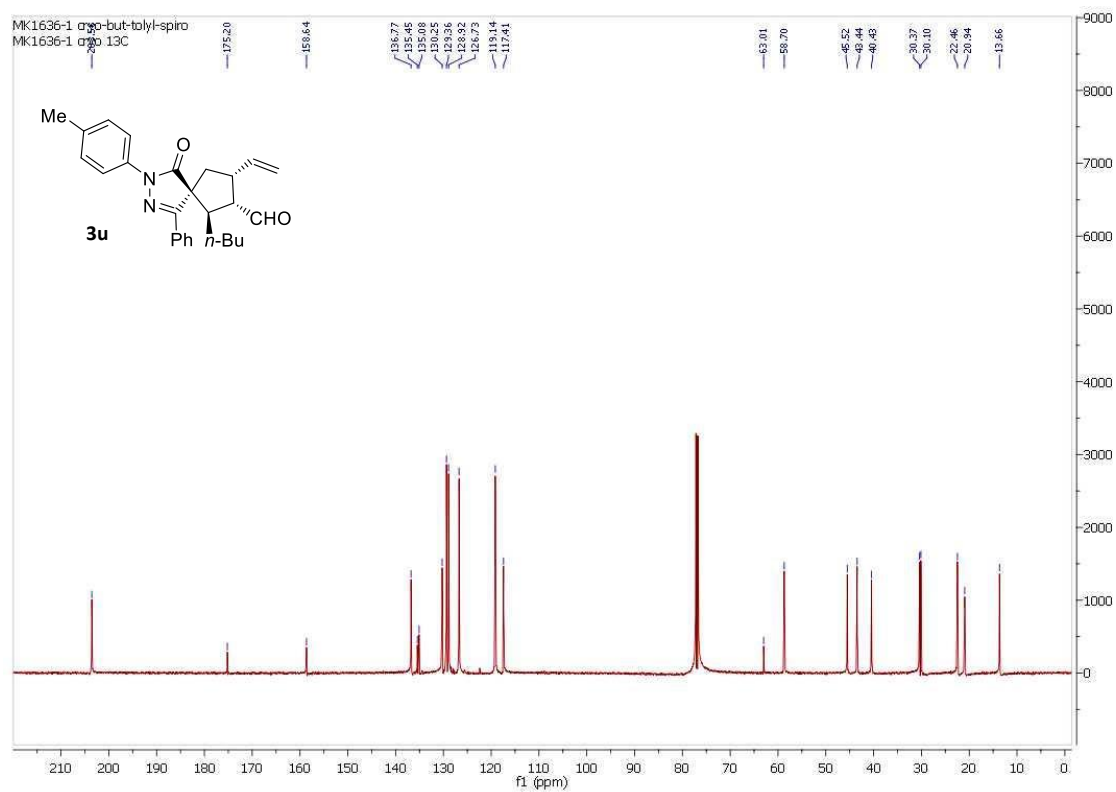

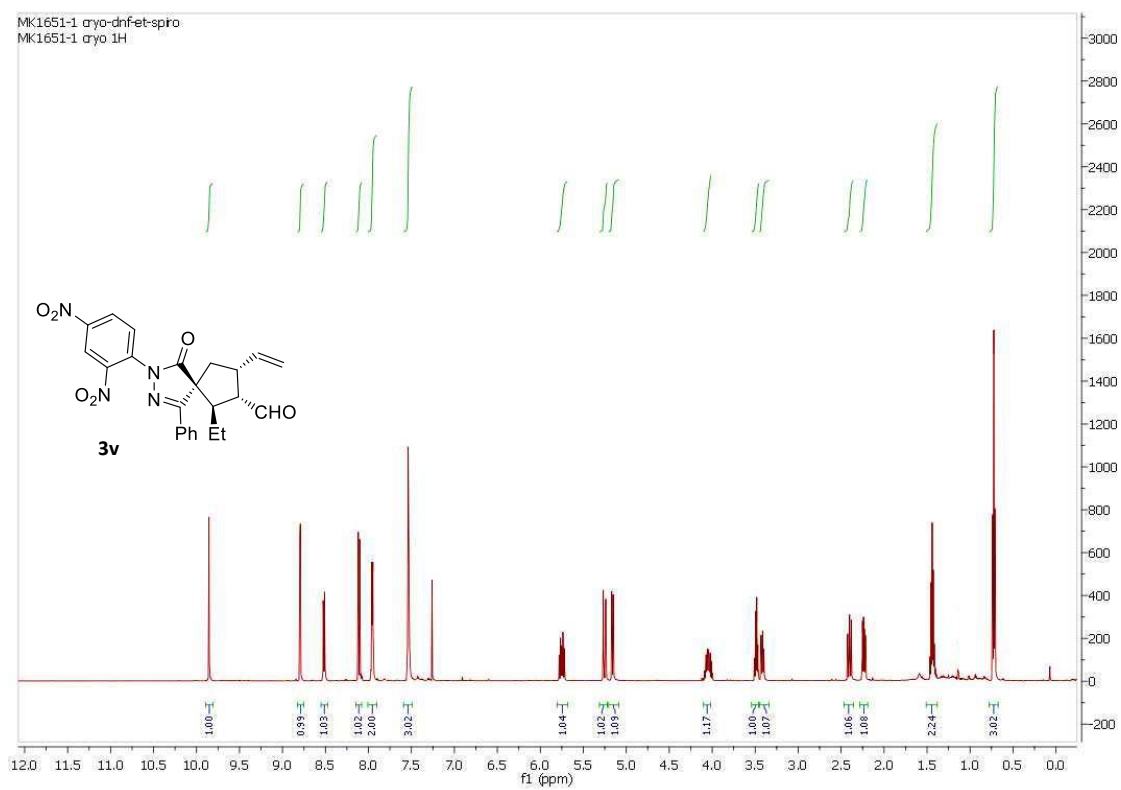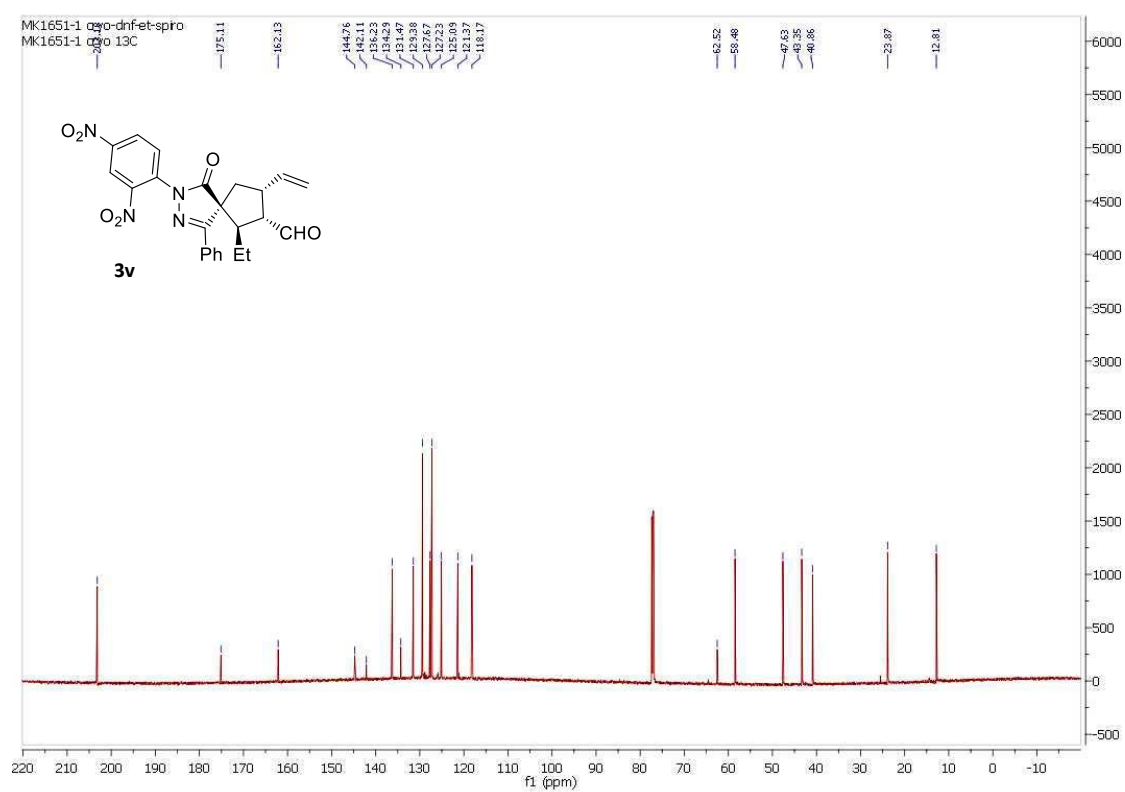

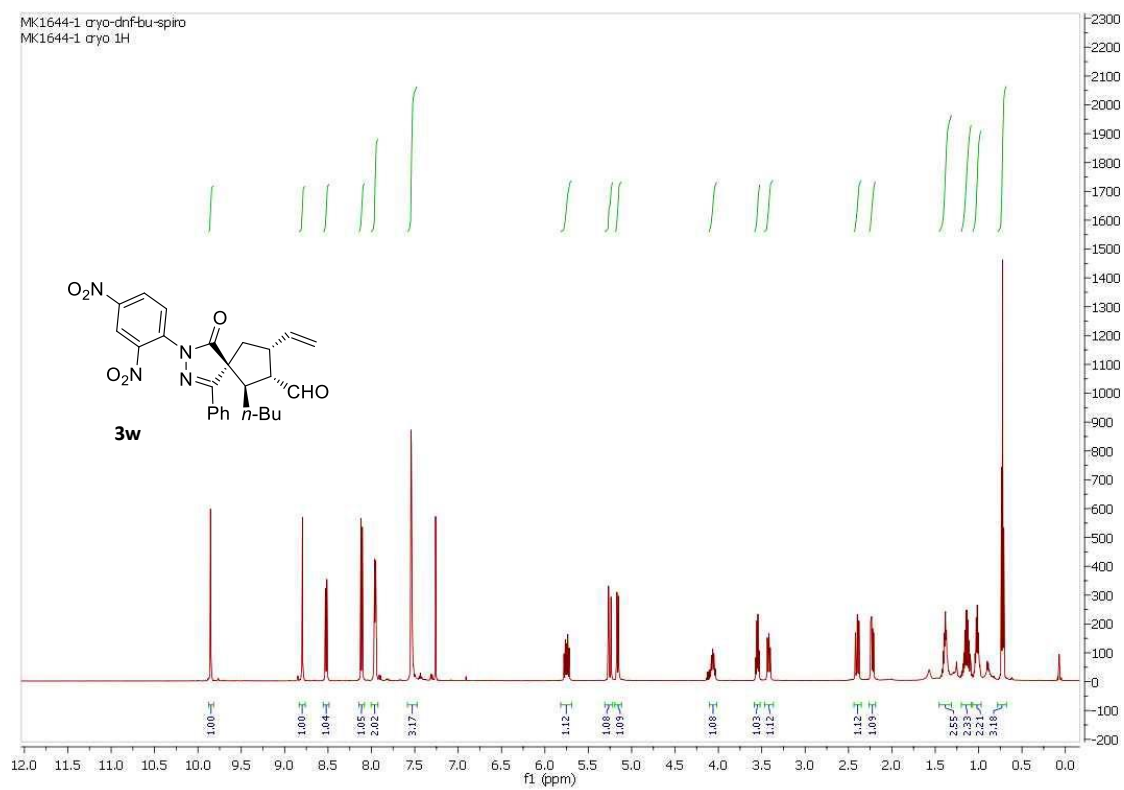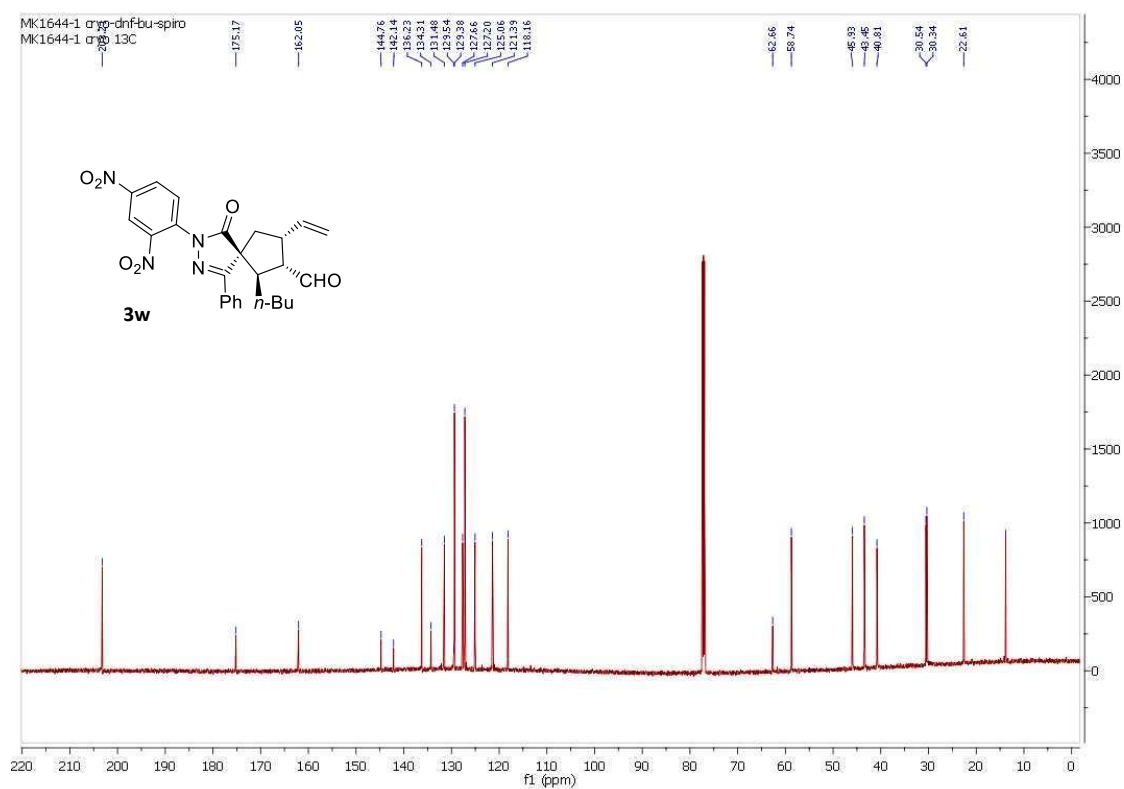

MK1684-1 cryo.1.fid  
MK1684-1 cryo no rotation

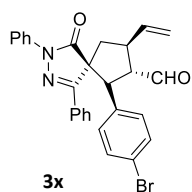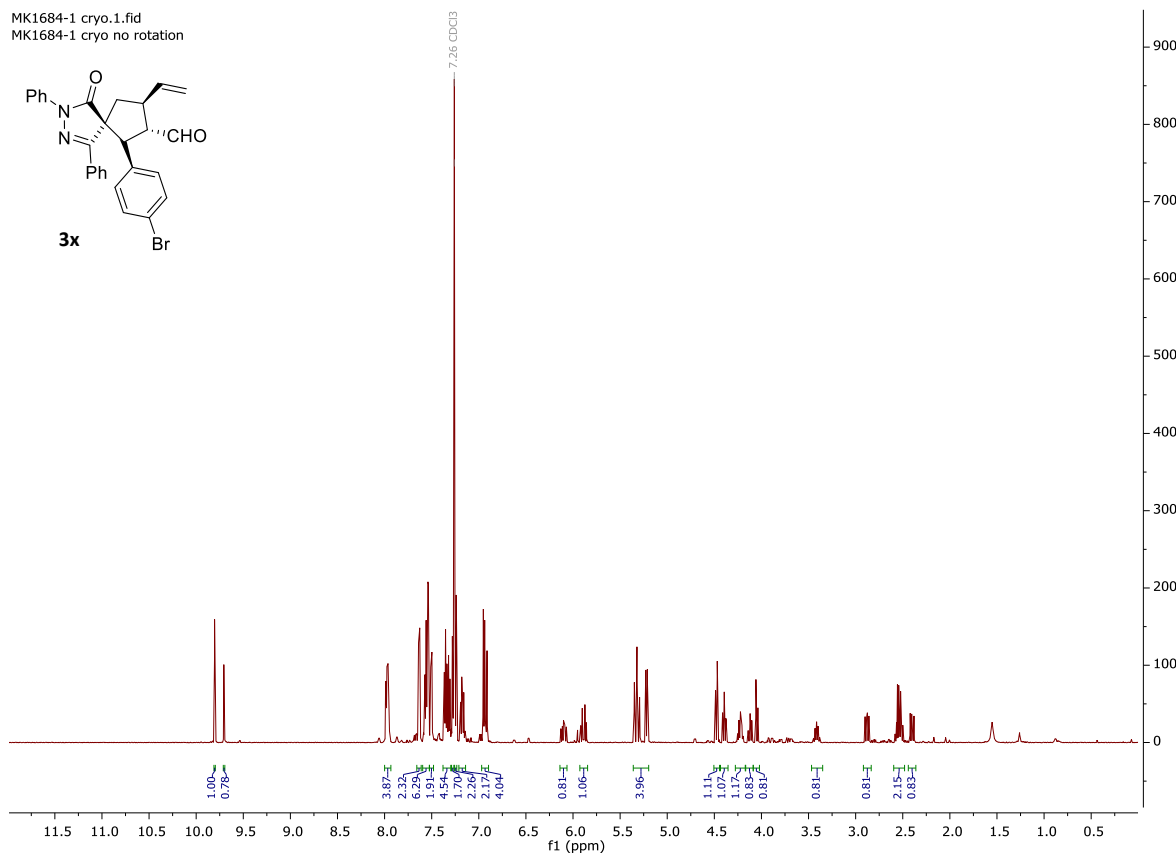

MK1684-1 cryo.2.fid  
MK1684-1 cryo cryo

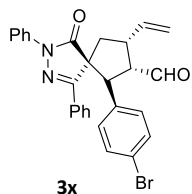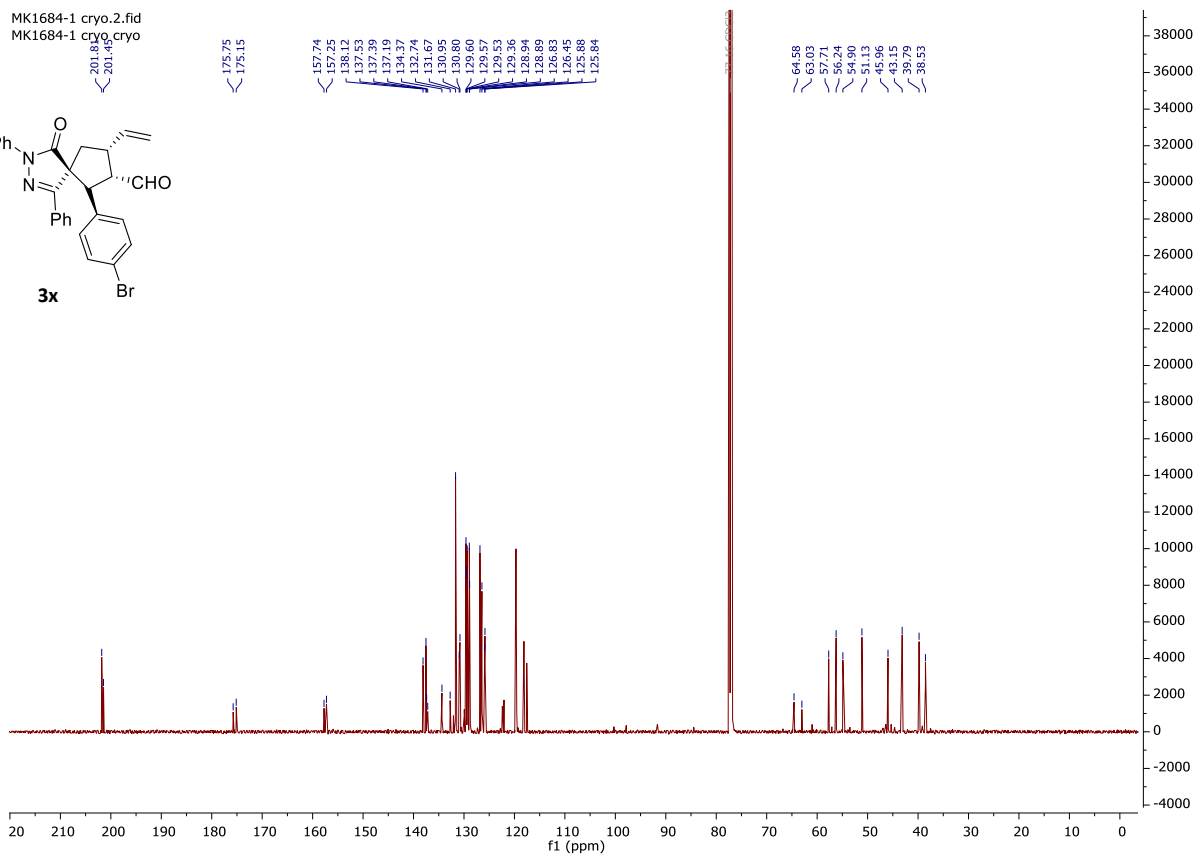

MK1668-1 cryo.1.fid  
MK1668-1 cryo 1H

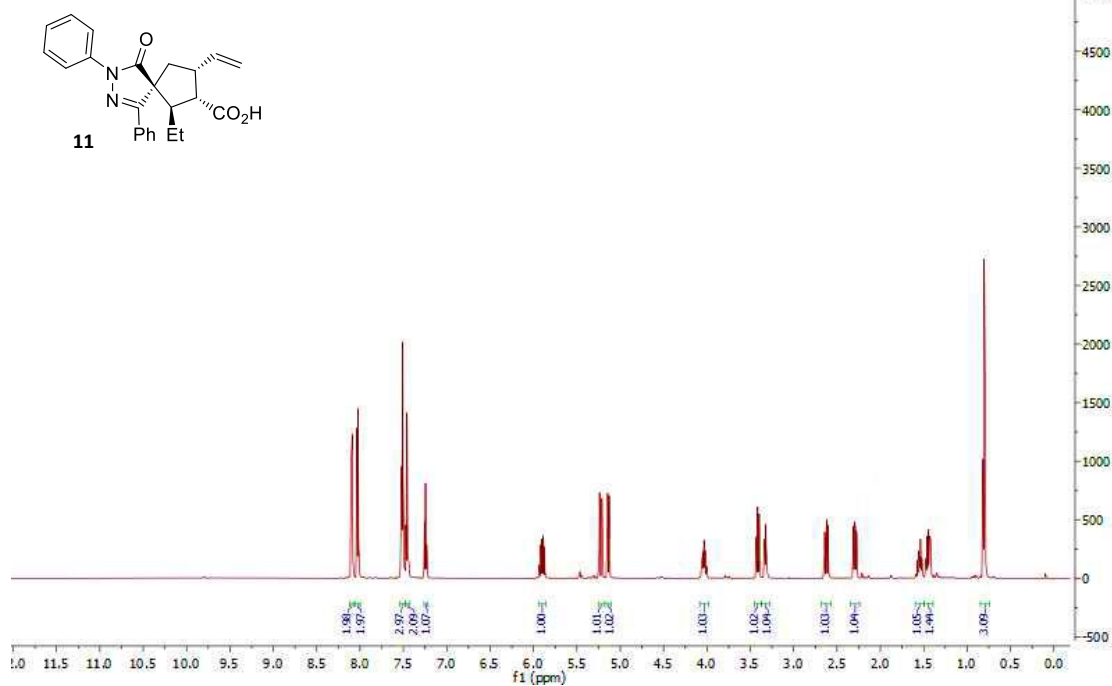

MK1668-1 cryo.2.fid  
MK1668-1 cryo 13C

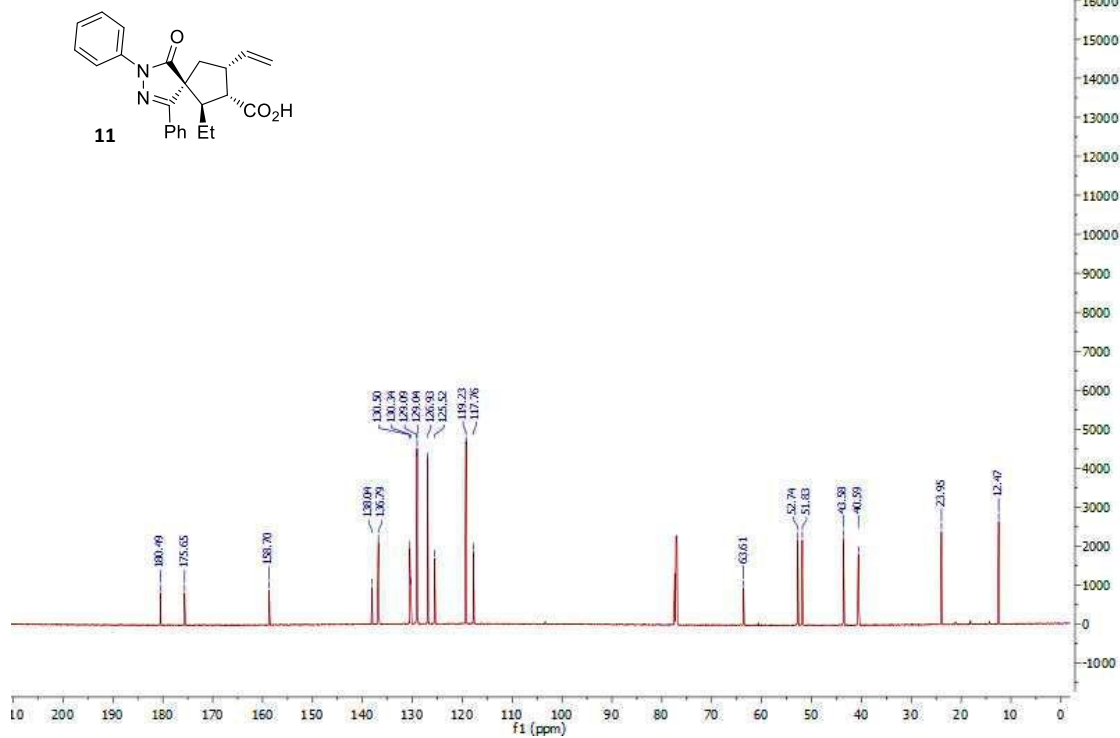

MK1667-1 cryo-iodolactonization-dia\_1.12.fid  
MK1667-1 cryo 1H

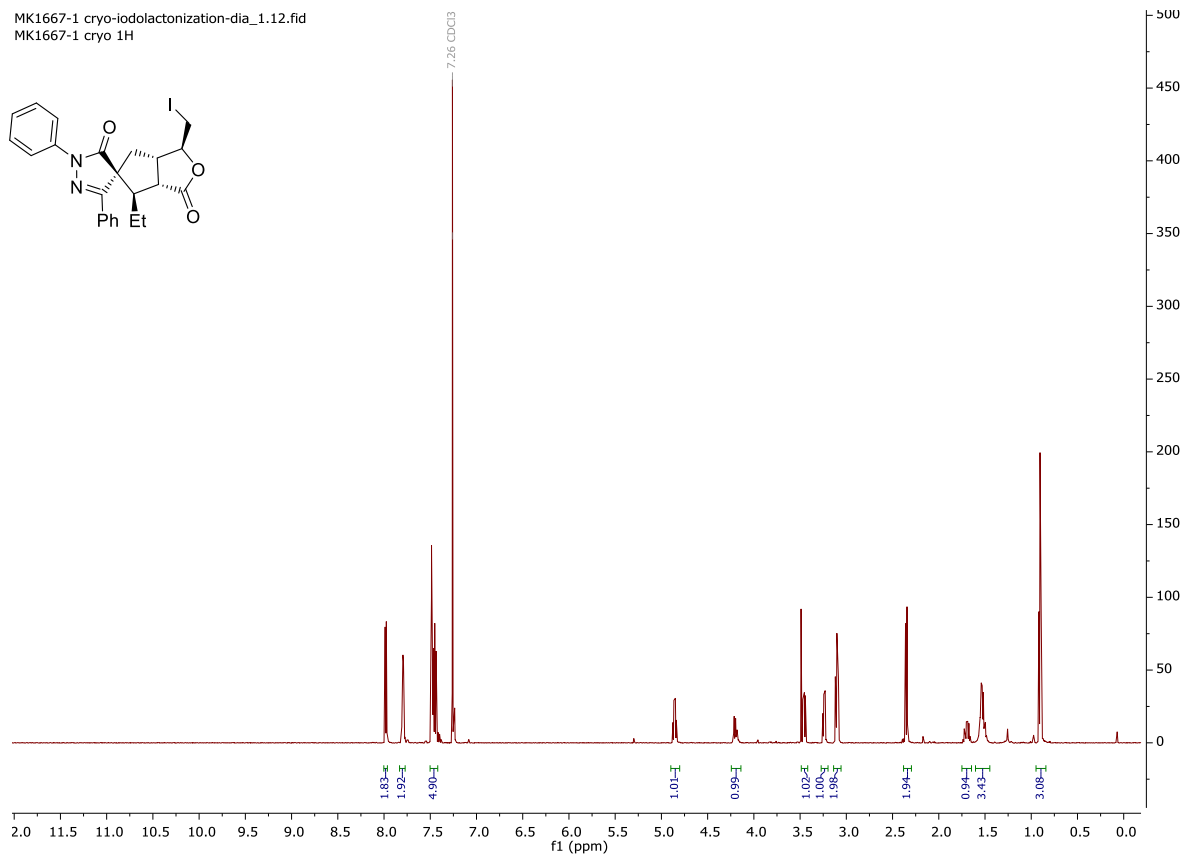

MK1667-1 cryo-iodolactonization-dia\_1.2.fid  
MK1667-1 cryo 13C

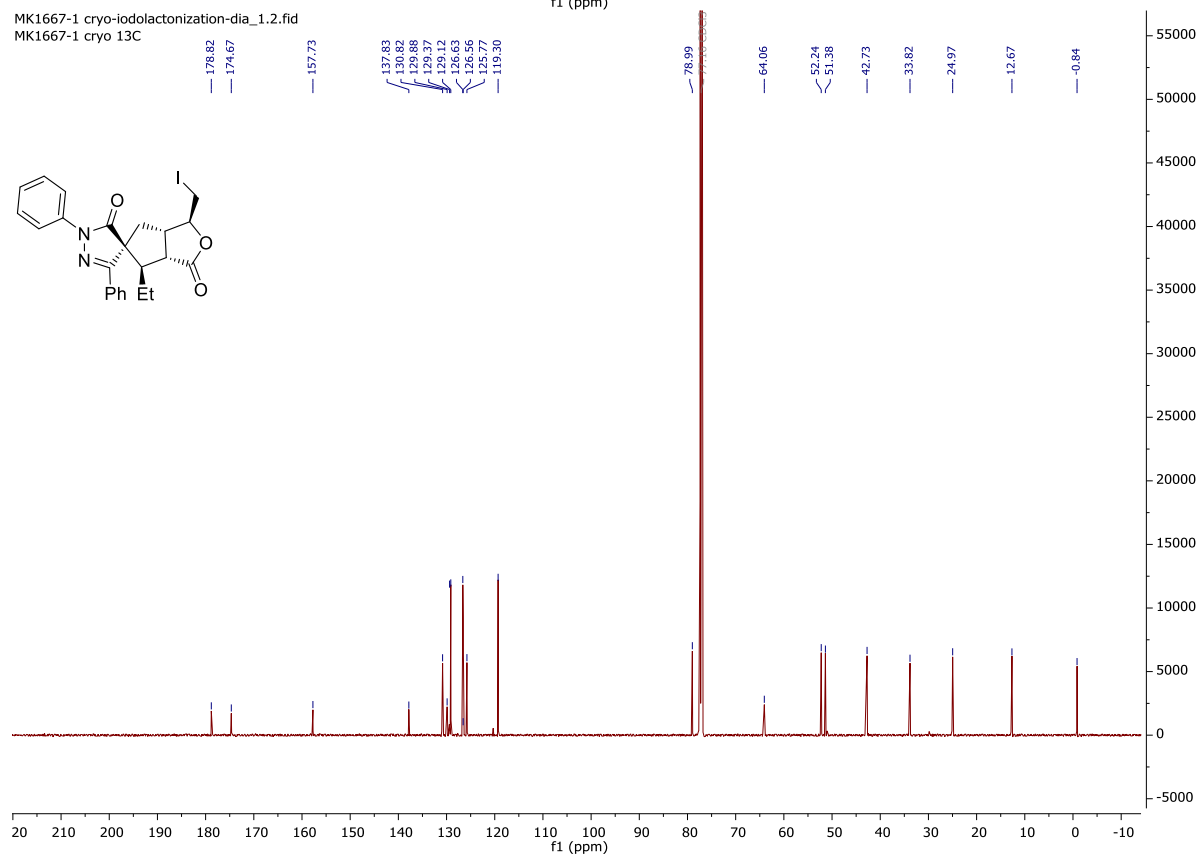



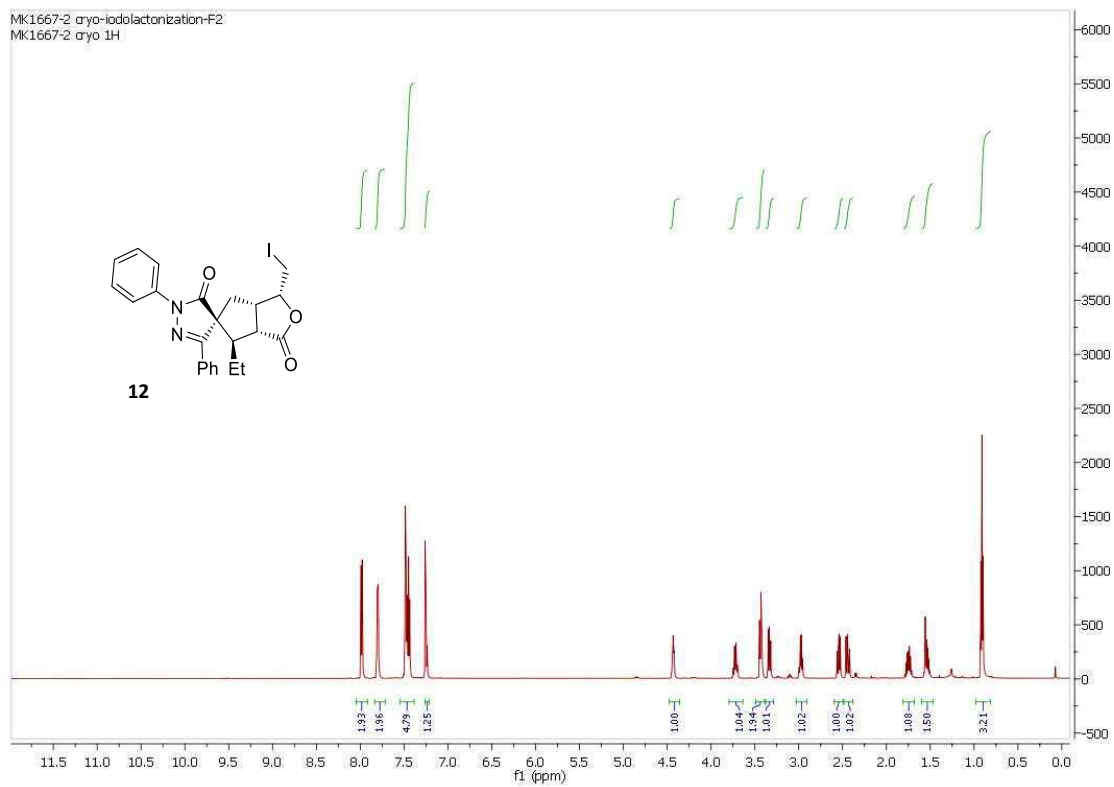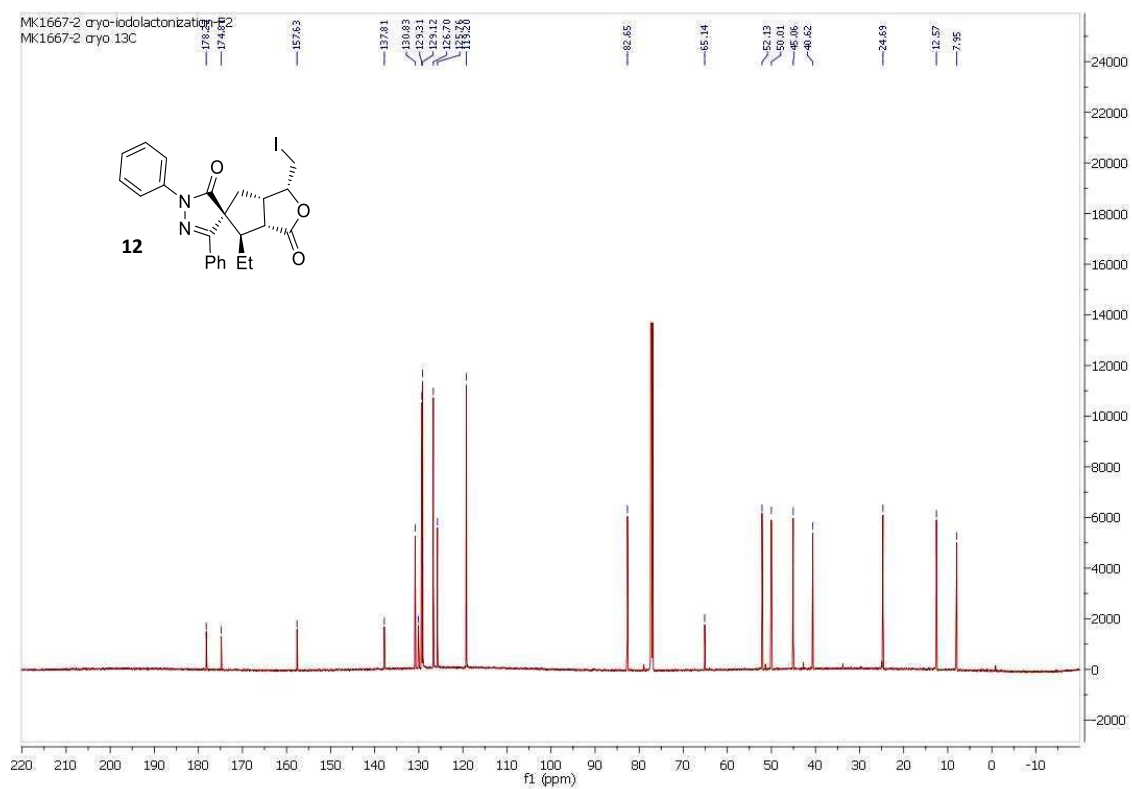

MK167-1\_oryo.1.fid  
MK167-1\_oryo.1H

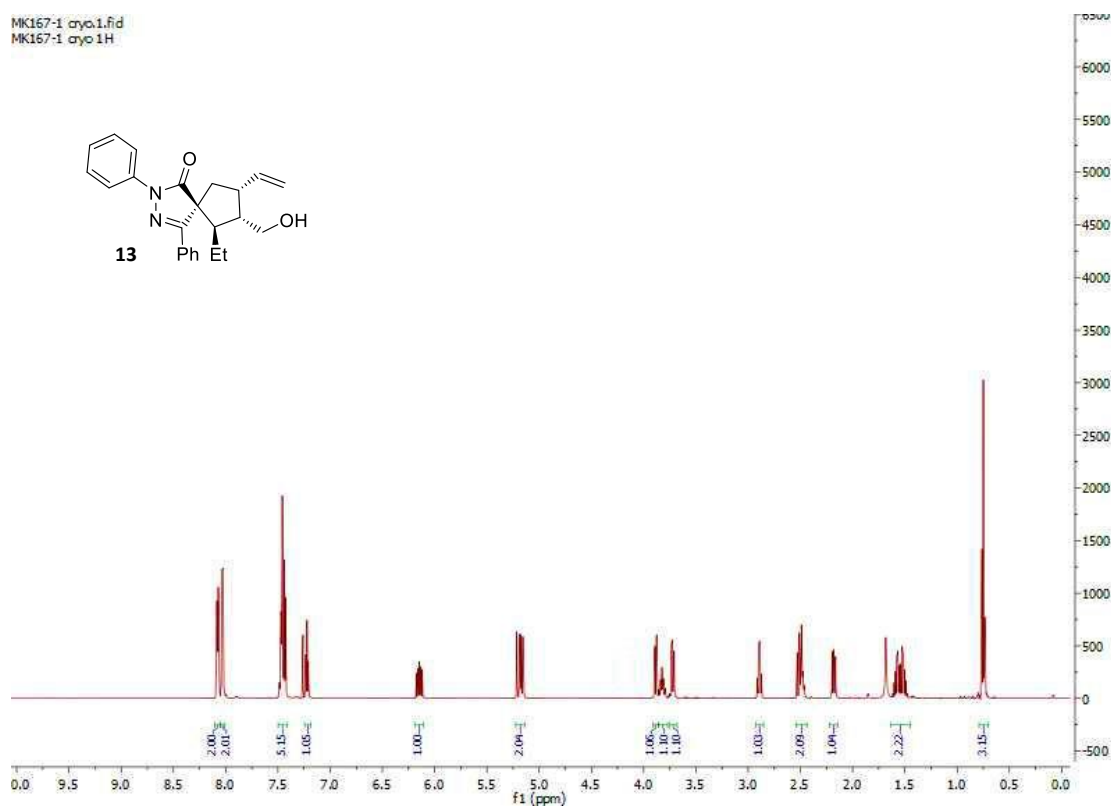

MK167-1\_oryo.2.fid  
MK167-1\_oryo.13C

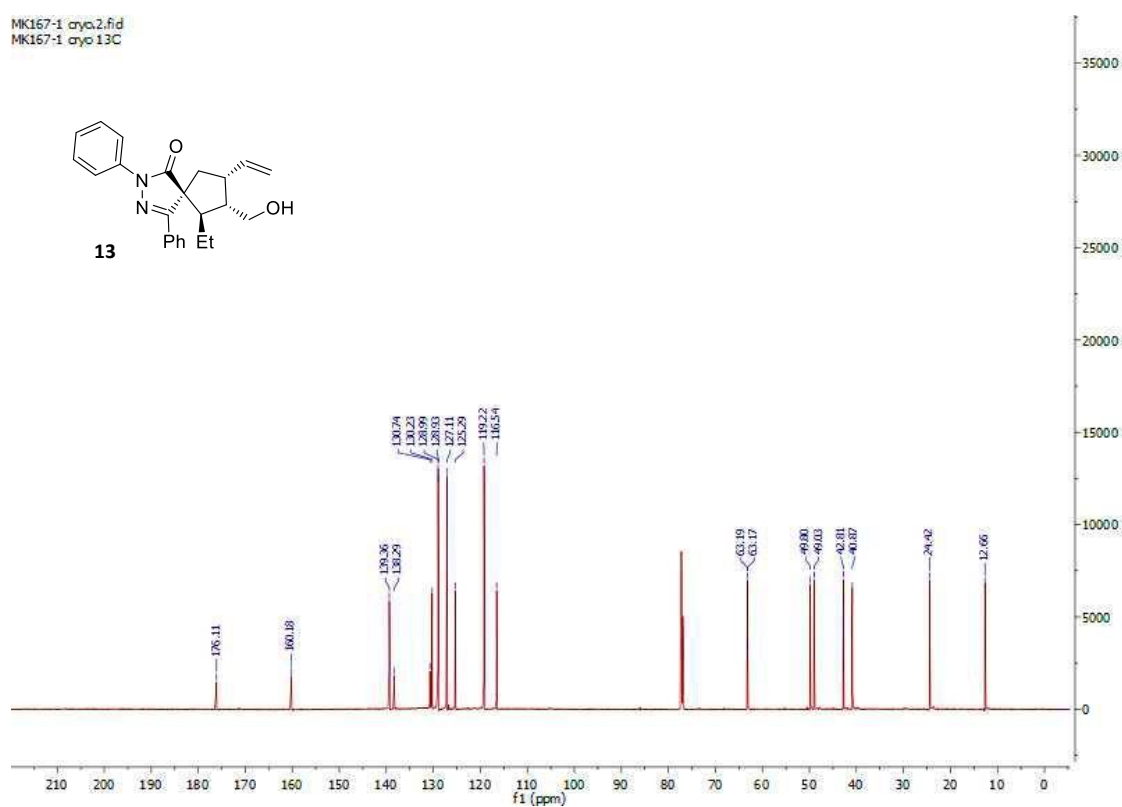

MK1672-1-bromoethylation.1.fid

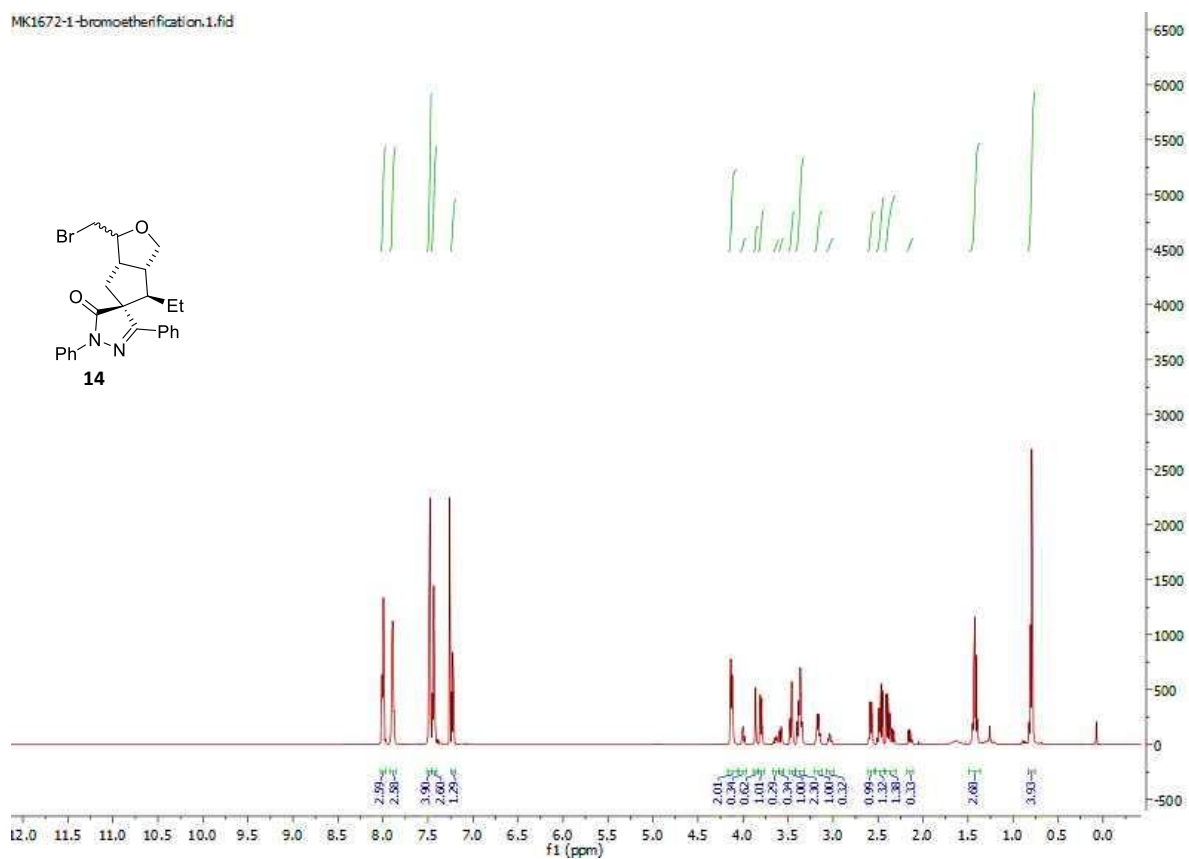

MK1672-1-bromoethylation.2.fid

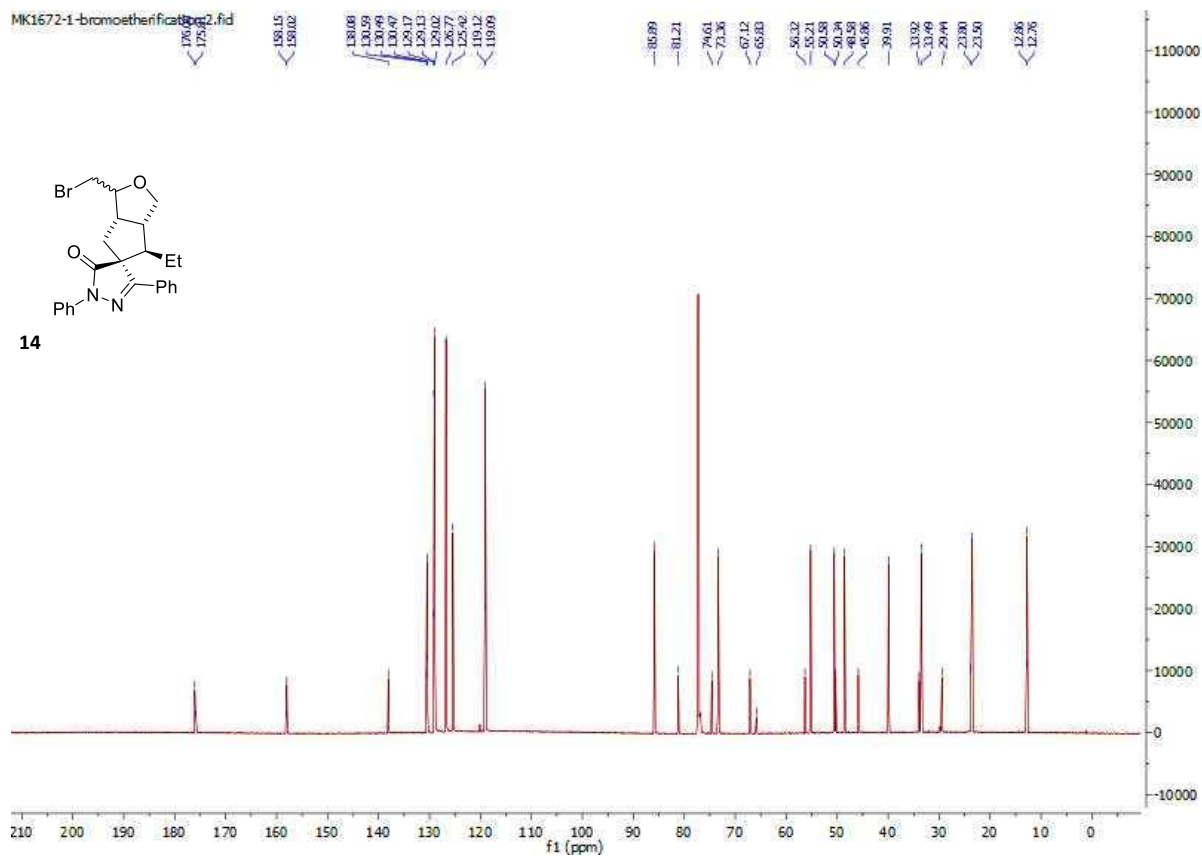

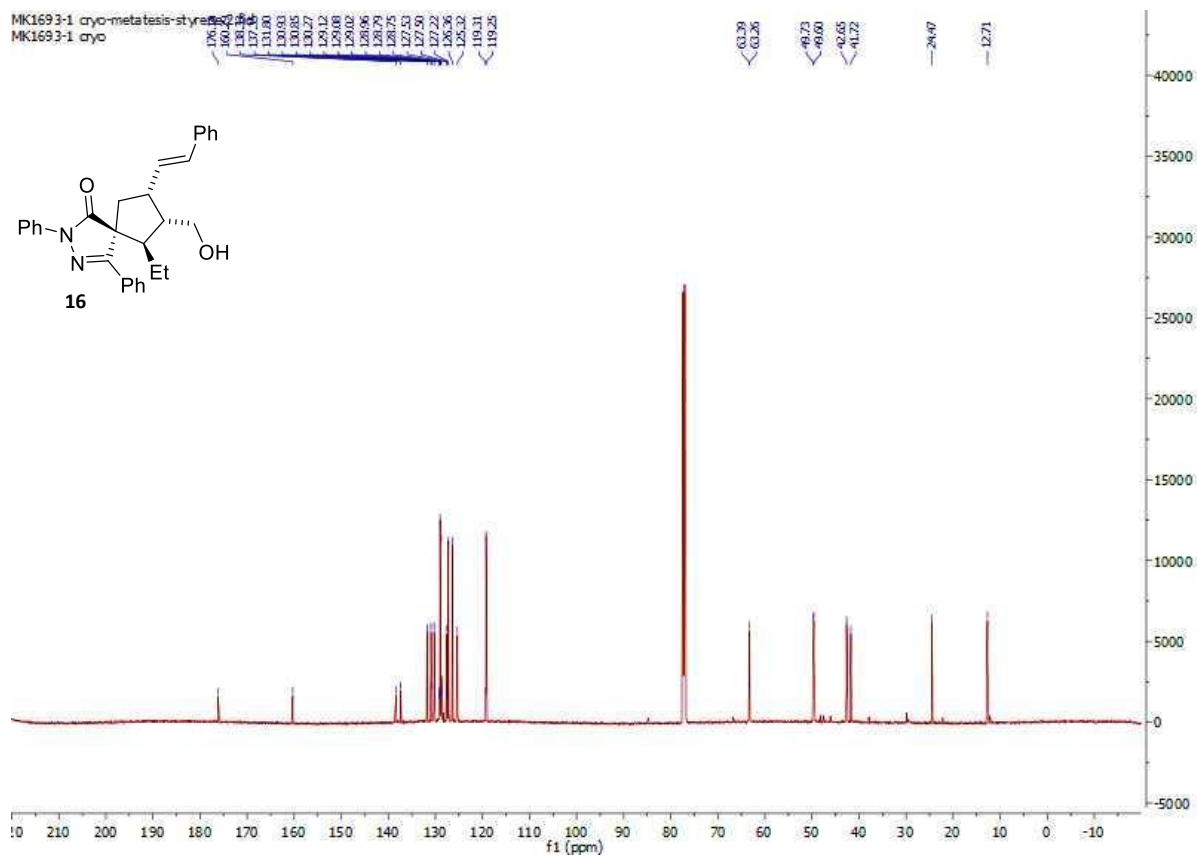

MK1694 cryo.7.fid

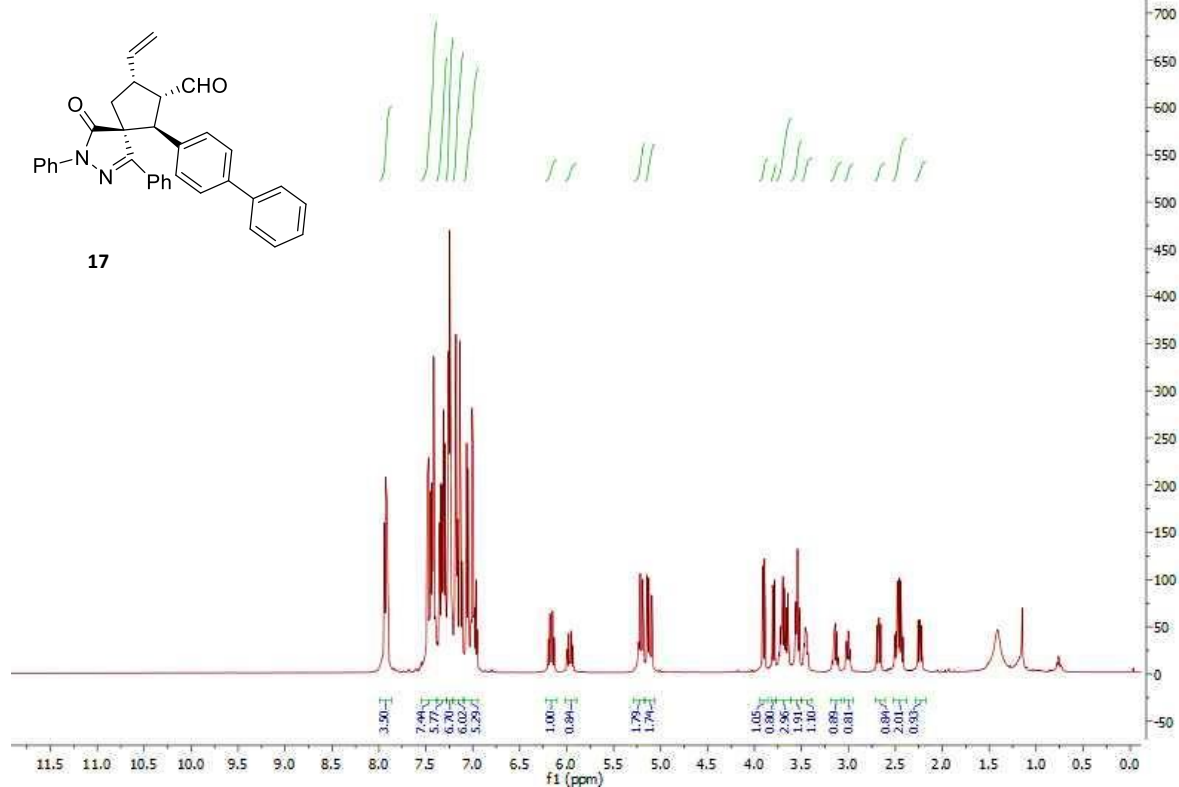

MK1694-1 cryo-suzuki.2.fid  
MK1694 cryo

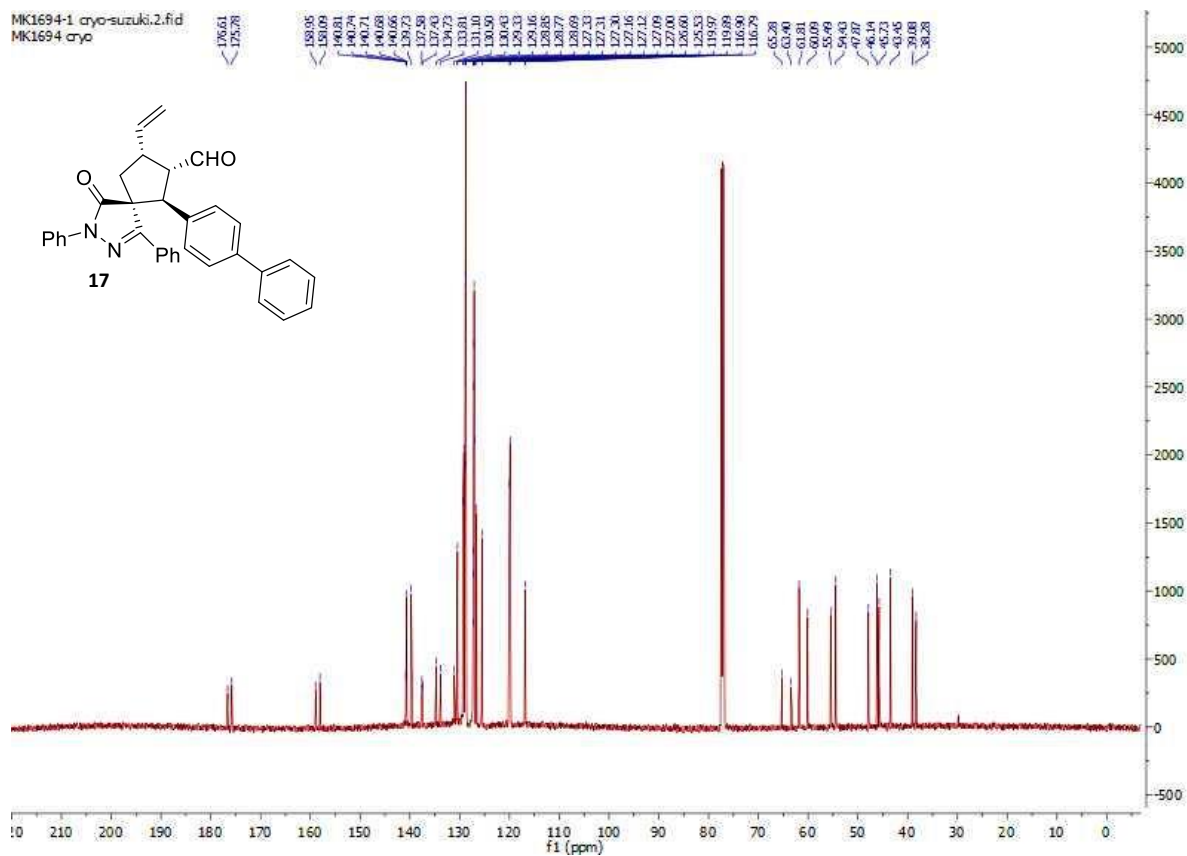

MK1681-1 cryo-allylation.1.fid  
MK1681-1 cryo no rotation

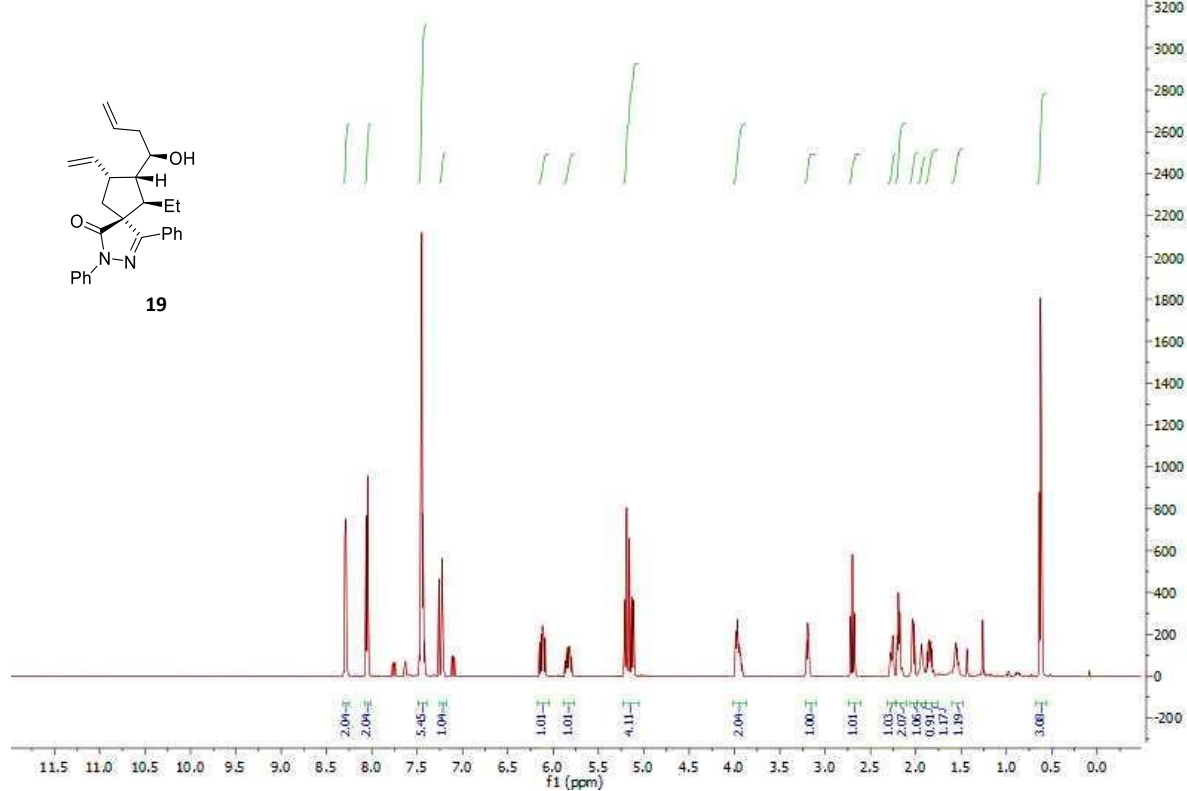

MK1681-1 cryo-allylation.2.fid  
MK1681-1 cryo 13C

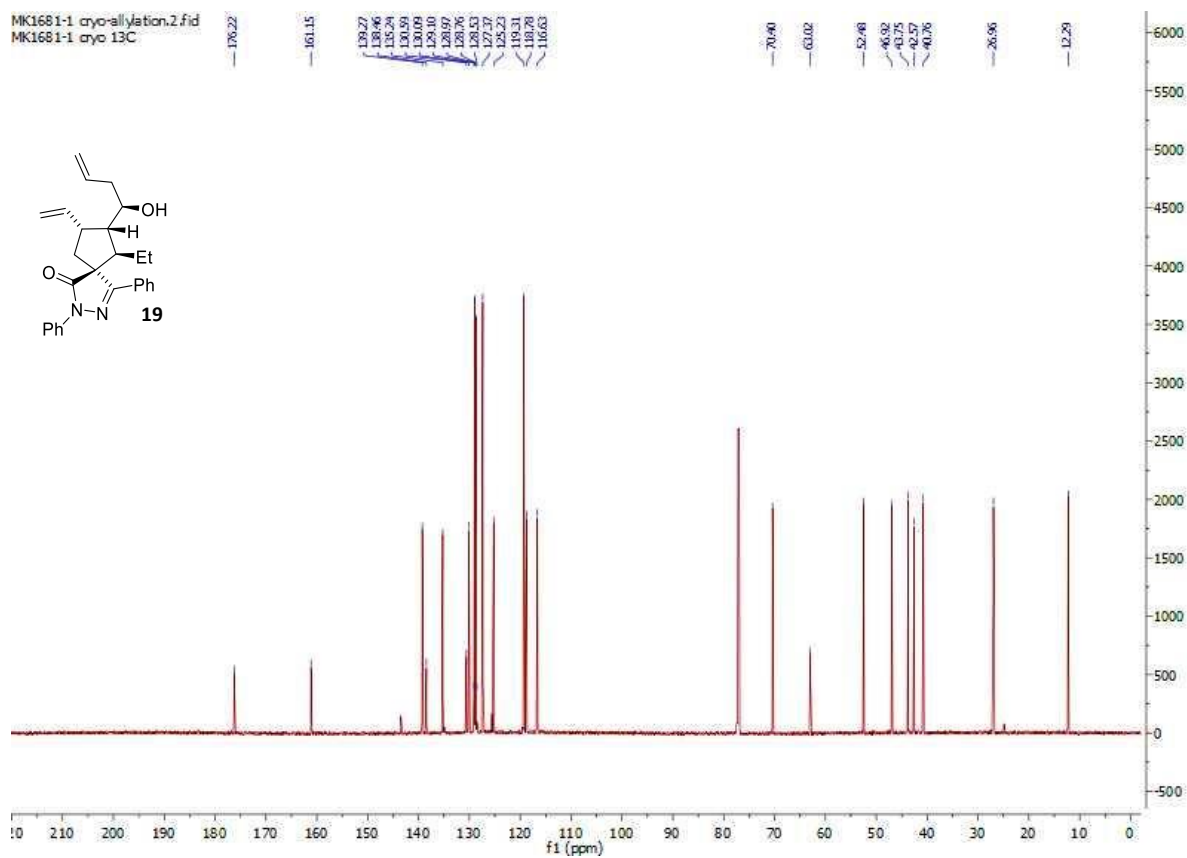



## 9. HPLC traces

Racemic **3a**:

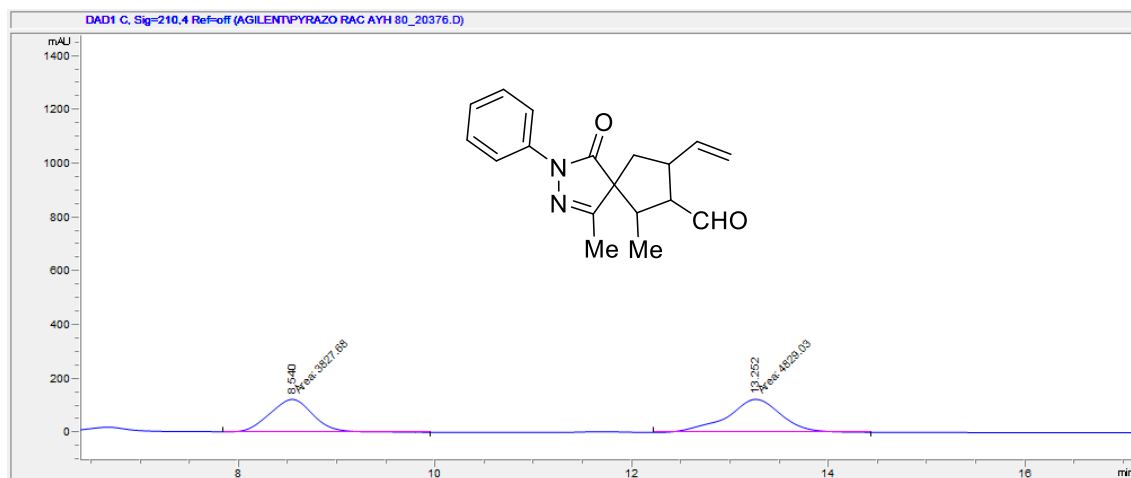

| Peak # | RetTime [min] | Type | Width [min] | Area [mAU*s] | Height [mAU] | Area %  |
|--------|---------------|------|-------------|--------------|--------------|---------|
| 1      | 8.540         | MM   | 0.5201      | 3827.67749   | 122.66637    | 44.2163 |
| 2      | 13.252        | MM   | 0.6514      | 4829.02979   | 123.55486    | 55.7837 |

Chiral R-catalyst **3a**:

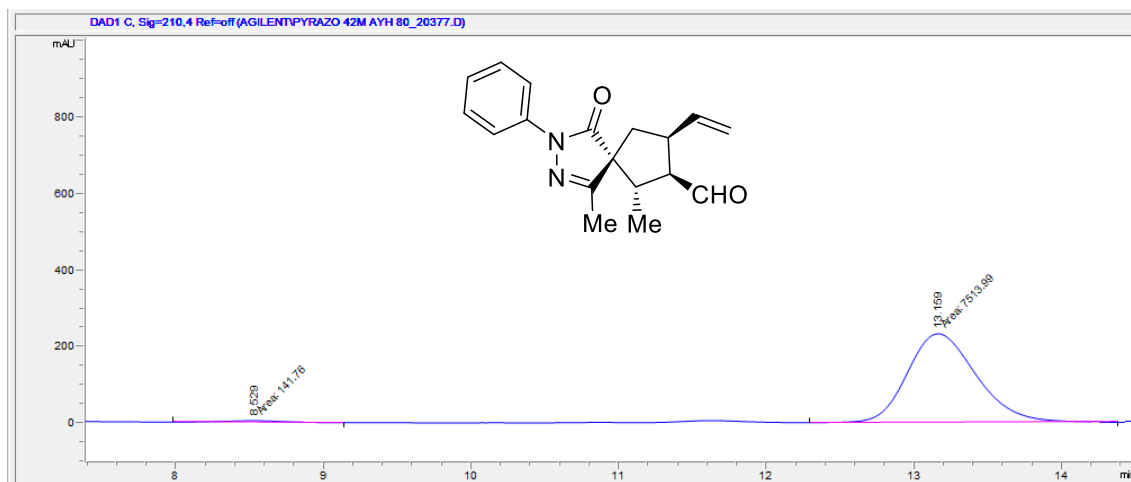

| Peak # | RetTime [min] | Type | Width [min] | Area [mAU*s] | Height [mAU] | Area %  |
|--------|---------------|------|-------------|--------------|--------------|---------|
| 1      | 8.529         | MM   | 0.5113      | 141.76050    | 4.62089      | 1.8517  |
| 2      | 13.159        | MM   | 0.5415      | 7513.99268   | 231.25137    | 98.1483 |



Racemic **3b**:

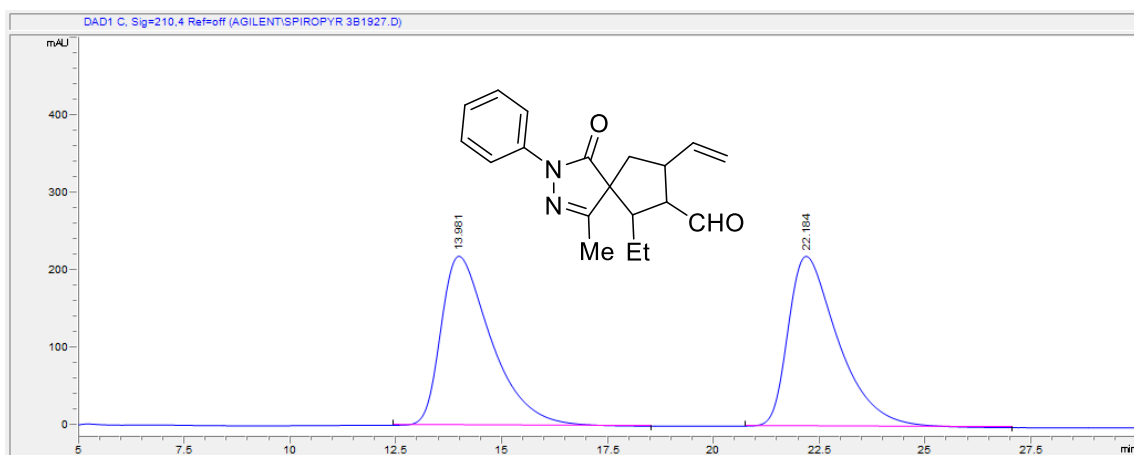

| Peak # | RetTime [min] | Type | Width [min] | Area [mAU*s] | Height [mAU] | Area %  |
|--------|---------------|------|-------------|--------------|--------------|---------|
| 1      | 13.981        | BB   | 1.2386      | 1.81793e4    | 218.51396    | 49.9983 |
| 2      | 22.184        | BB   | 1.2338      | 1.81805e4    | 219.61974    | 50.0017 |

Chiral S-catalyst **3b**:

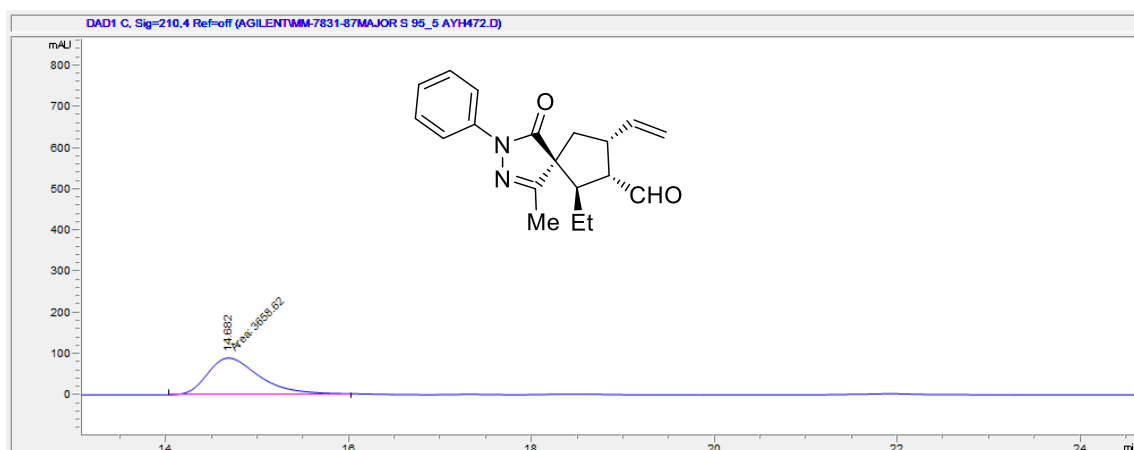

| Peak # | RetTime [min] | Type | Width [min] | Area [mAU*s] | Height [mAU] | Area %   |
|--------|---------------|------|-------------|--------------|--------------|----------|
| 1      | 14.682        | MM   | 0.6756      | 3658.61670   | 90.25788     | 100.0000 |

Racemic **3c**:

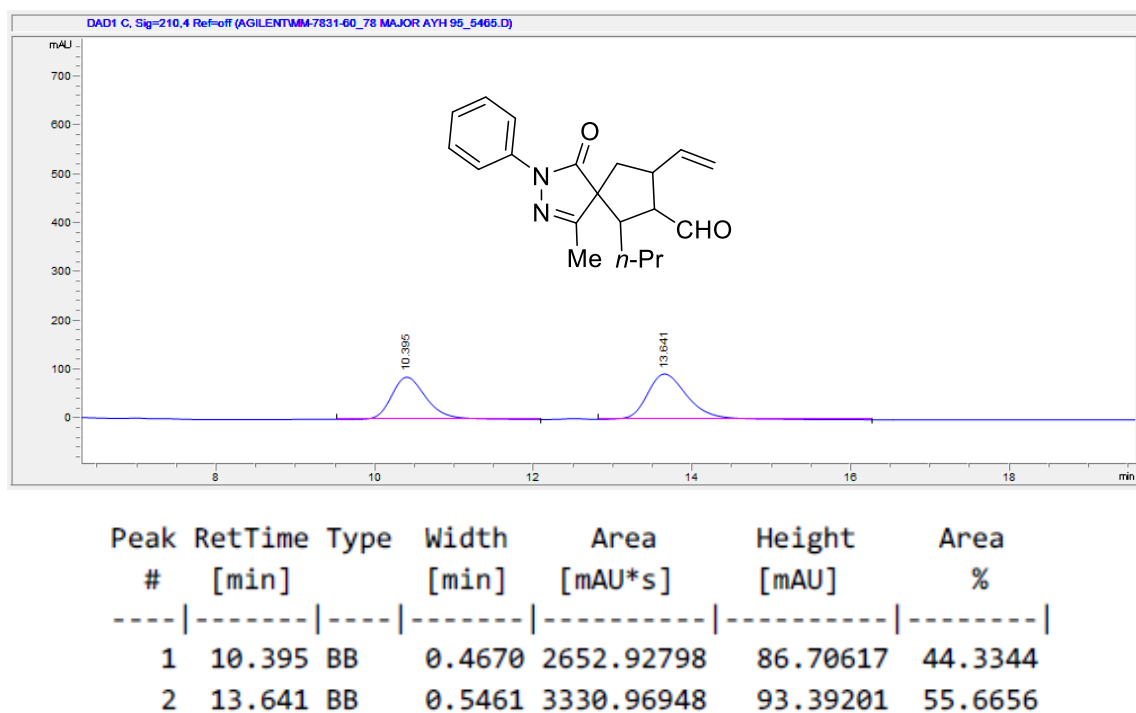

Chiral S-catalyst **3c**:

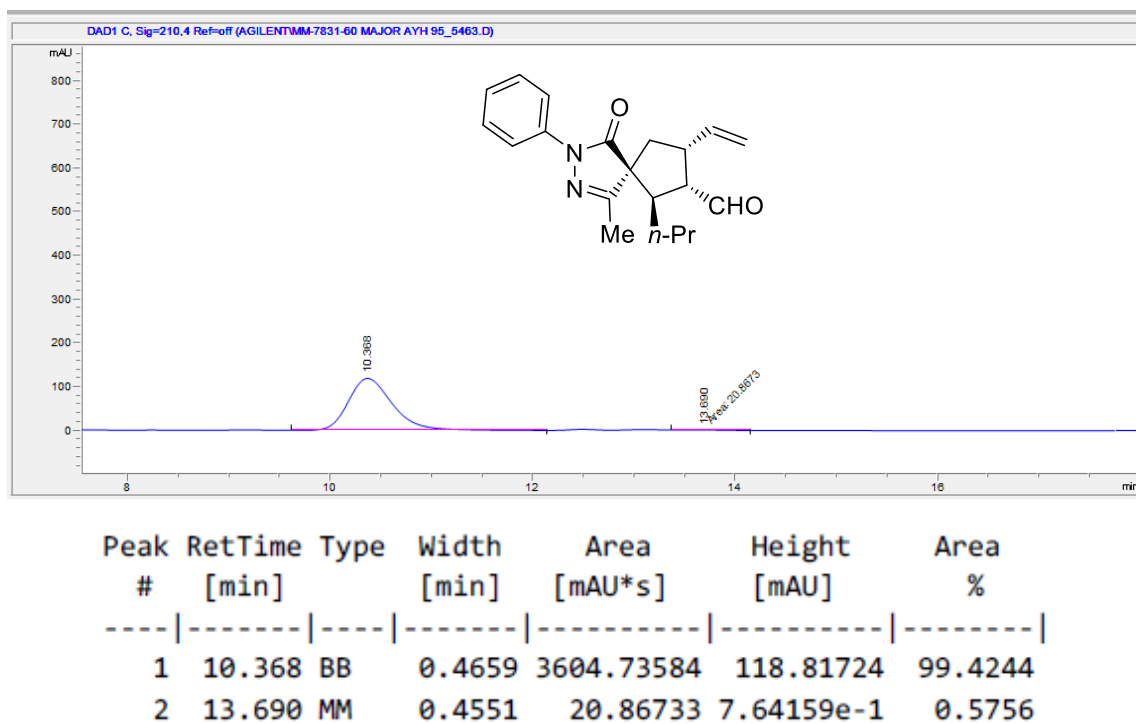

Racemic **3d**:

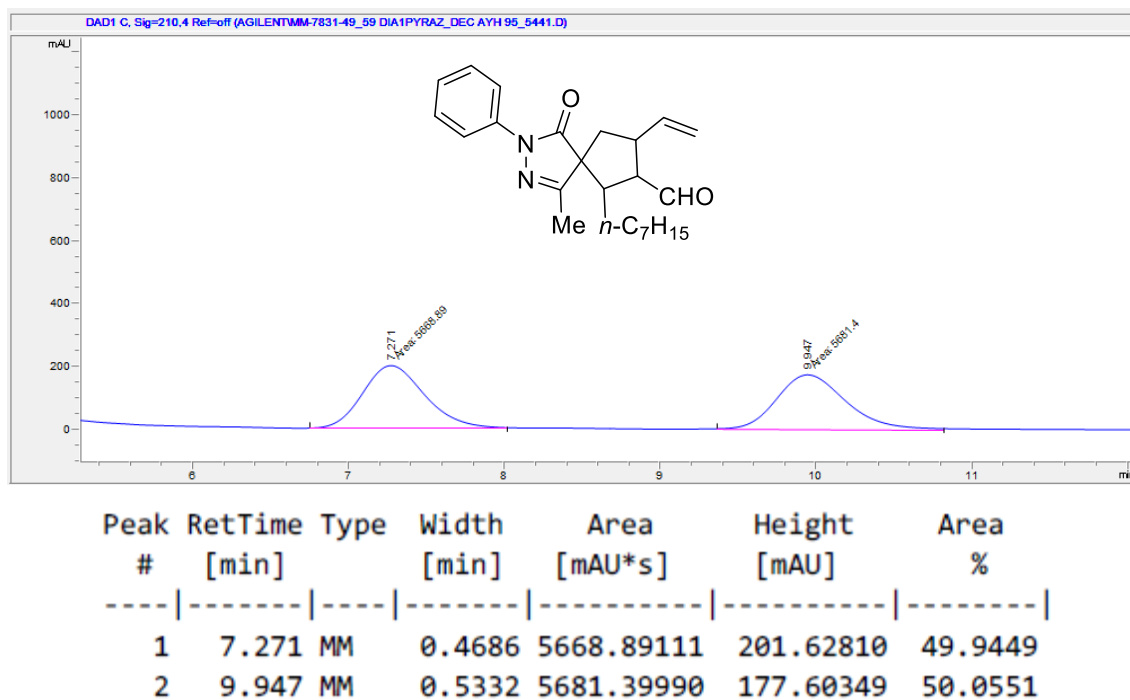

Chiral S-catalyst **3d**:

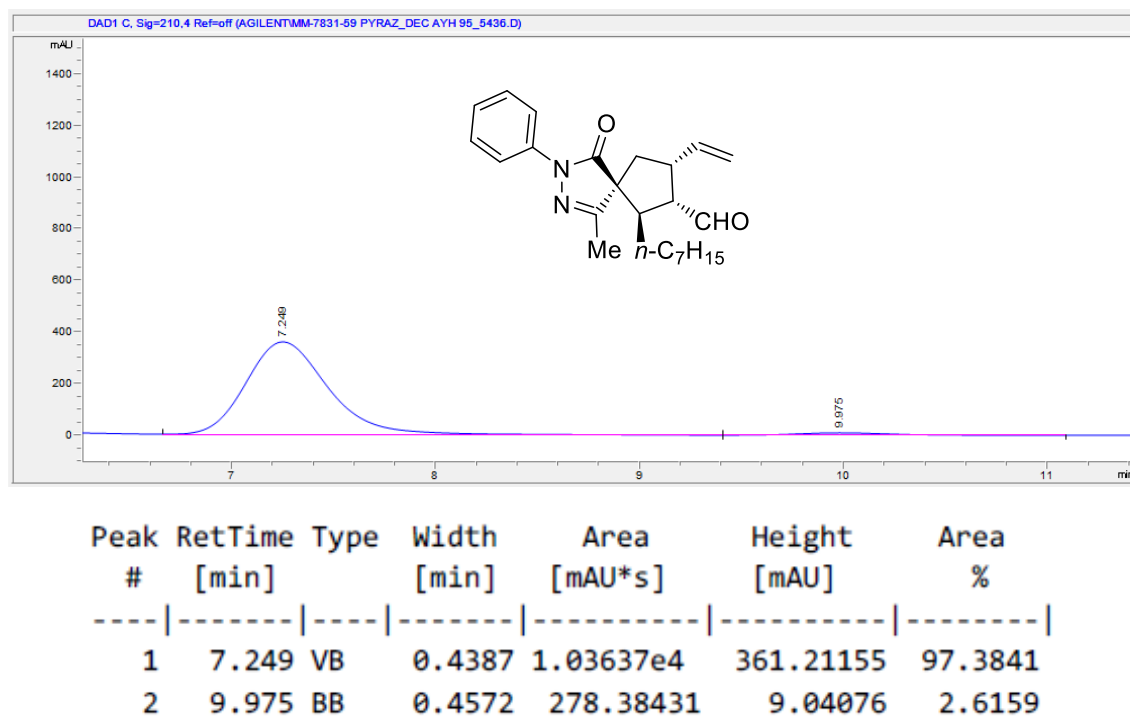

Racemic **3e**:

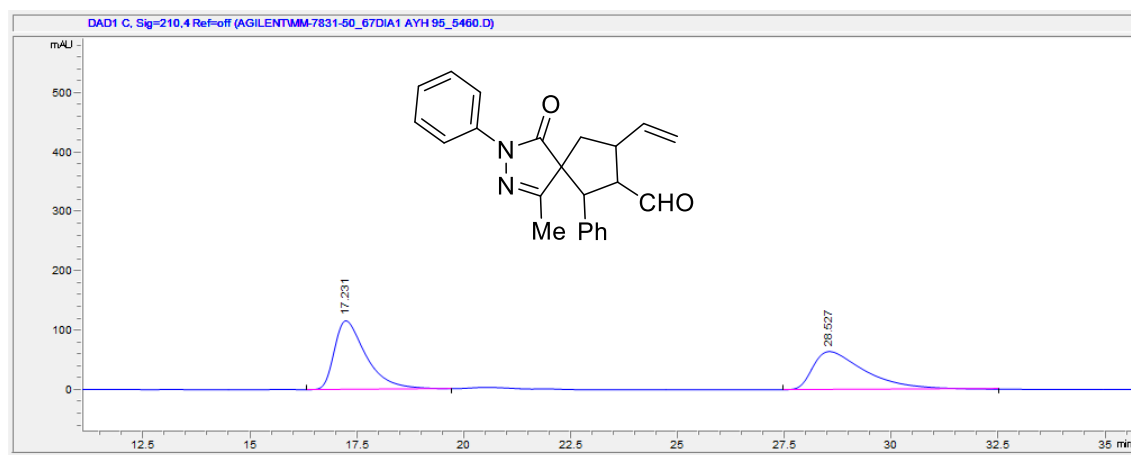

| Peak # | RetTime [min] | Type | Width [min] | Area [mAU*s] | Height [mAU] | Area %  |
|--------|---------------|------|-------------|--------------|--------------|---------|
| 1      | 17.231        | BB   | 0.7610      | 5973.08252   | 115.56862    | 52.0811 |
| 2      | 28.527        | BB   | 1.2203      | 5495.73291   | 64.09579     | 47.9189 |

Chiral S-catalyst **3e**:

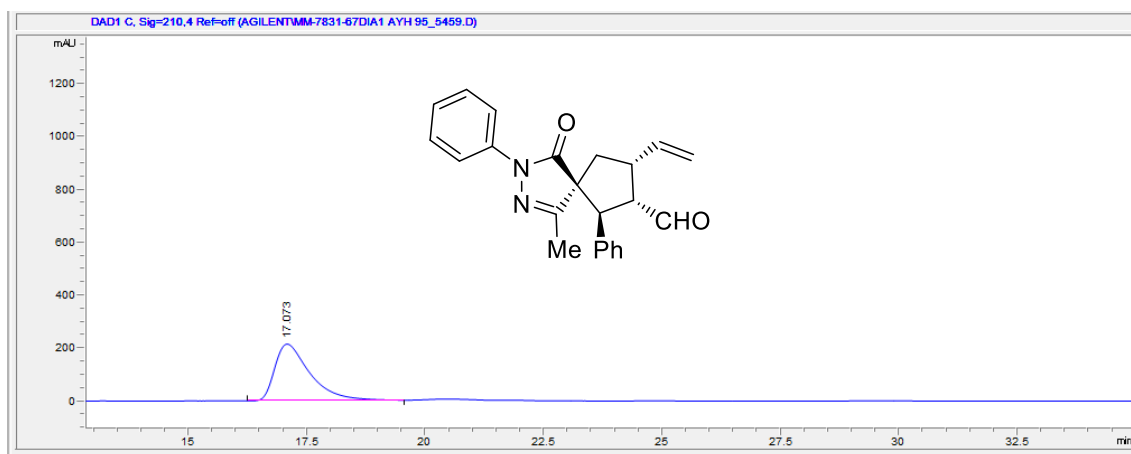

| Peak # | RetTime [min] | Type | Width [min] | Area [mAU*s] | Height [mAU] | Area %   |
|--------|---------------|------|-------------|--------------|--------------|----------|
| 1      | 17.073        | BB   | 0.7671      | 1.10469e4    | 214.39632    | 100.0000 |

Racemic **3f**:

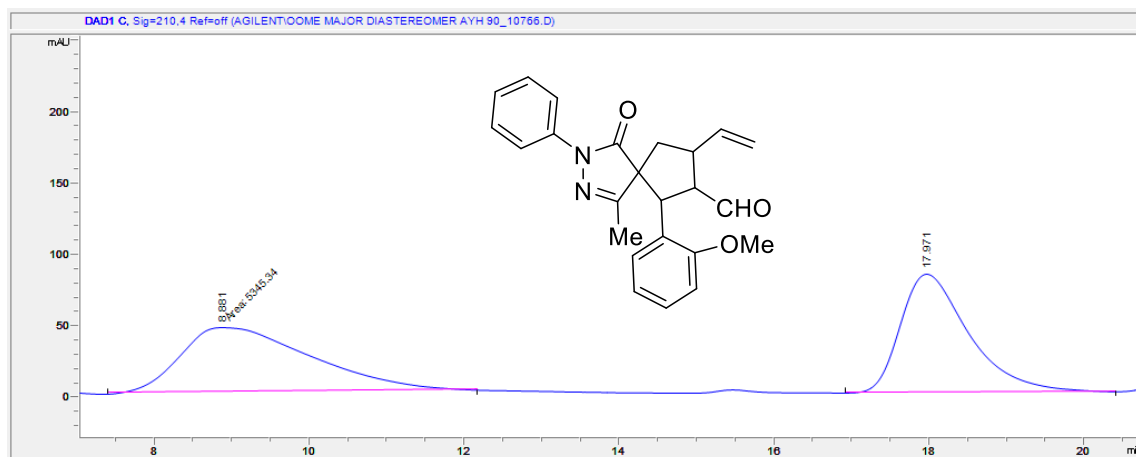

| Peak # | RetTime [min] | Type | Width [min] | Area [mAU*s] | Height [mAU] | Area %  |
|--------|---------------|------|-------------|--------------|--------------|---------|
| 1      | 8.881         | MM   | 1.9601      | 5345.34131   | 45.45207     | 51.0661 |
| 2      | 17.971        | BB   | 0.9237      | 5122.14844   | 83.26894     | 48.9339 |

Chiral S-catalyst **3f**:

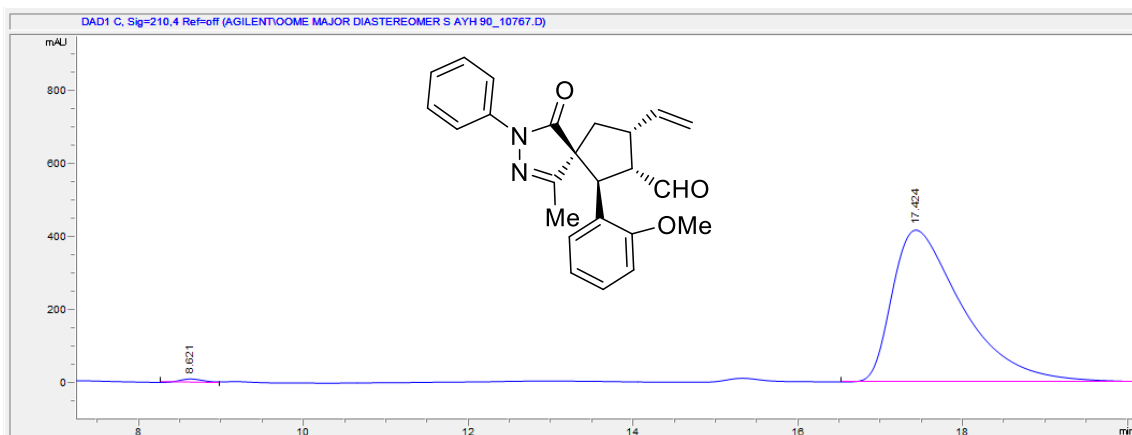

| Peak # | RetTime [min] | Type | Width [min] | Area [mAU*s] | Height [mAU] | Area %  |
|--------|---------------|------|-------------|--------------|--------------|---------|
| 1      | 8.621         | BV   | 0.3185      | 202.34747    | 9.73465      | 0.8183  |
| 2      | 17.424        | BB   | 0.8849      | 2.45246e4    | 415.33023    | 99.1817 |

Racemic **3g**:

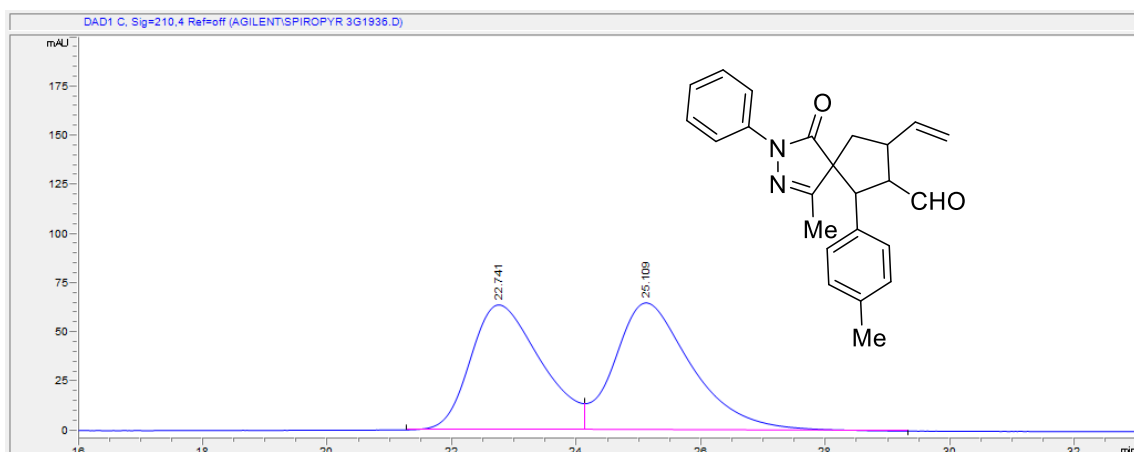

| Peak # | RetTime [min] | Type | Width [min] | Area [mAU*s] | Height [mAU] | Area %  |
|--------|---------------|------|-------------|--------------|--------------|---------|
| 1      | 22.741        | BV   | 1.1525      | 4999.61084   | 63.50286     | 47.1329 |
| 2      | 25.109        | VB   | 1.2610      | 5607.86182   | 64.71004     | 52.8671 |

Chiral S-catalyst **3g**:

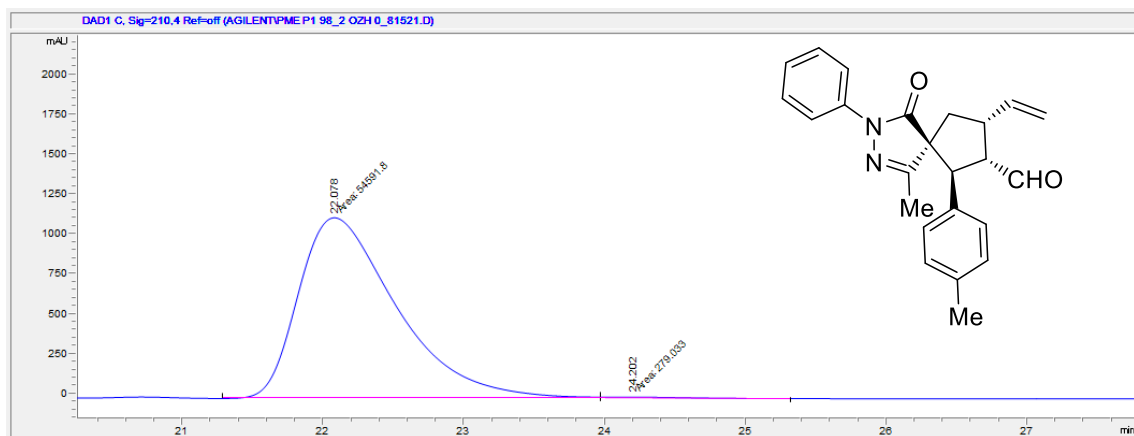

| Peak # | RetTime [min] | Type | Width [min] | Area [mAU*s] | Height [mAU] | Area %  |
|--------|---------------|------|-------------|--------------|--------------|---------|
| 1      | 22.078        | MM   | 0.8063      | 5.45918e4    | 1128.46704   | 99.4915 |
| 2      | 24.202        | MM   | 0.6734      | 279.03348    | 6.90646      | 0.5085  |

Racemic **3h**:

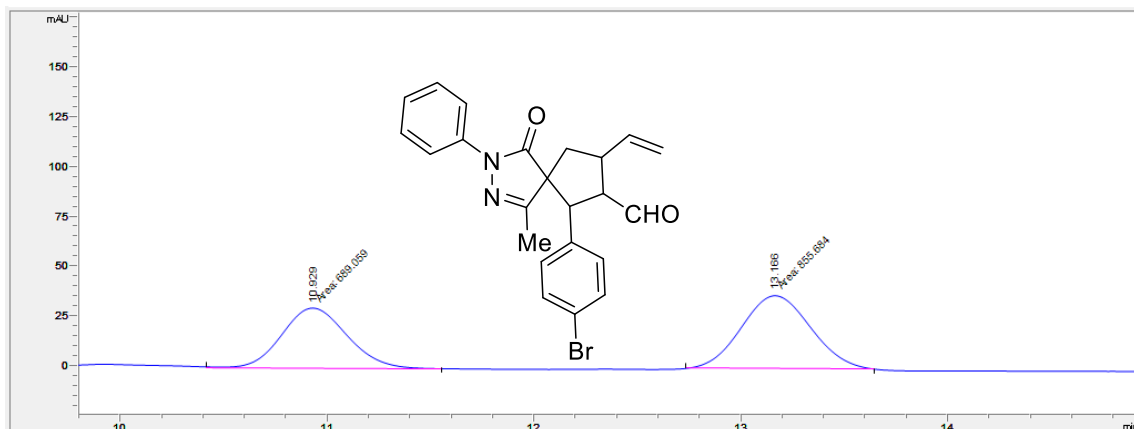

Chiral S-catalyst **3h**:

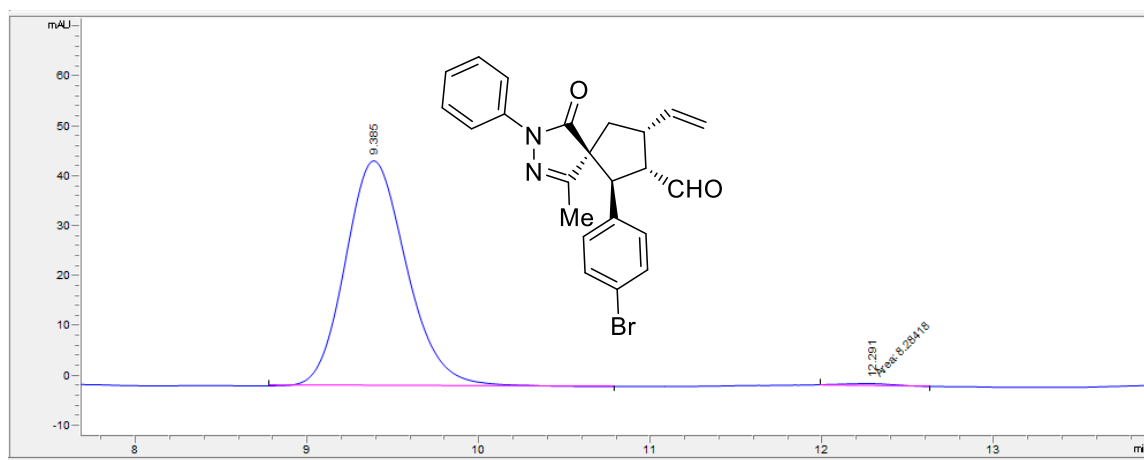

Racemic **3i** major:

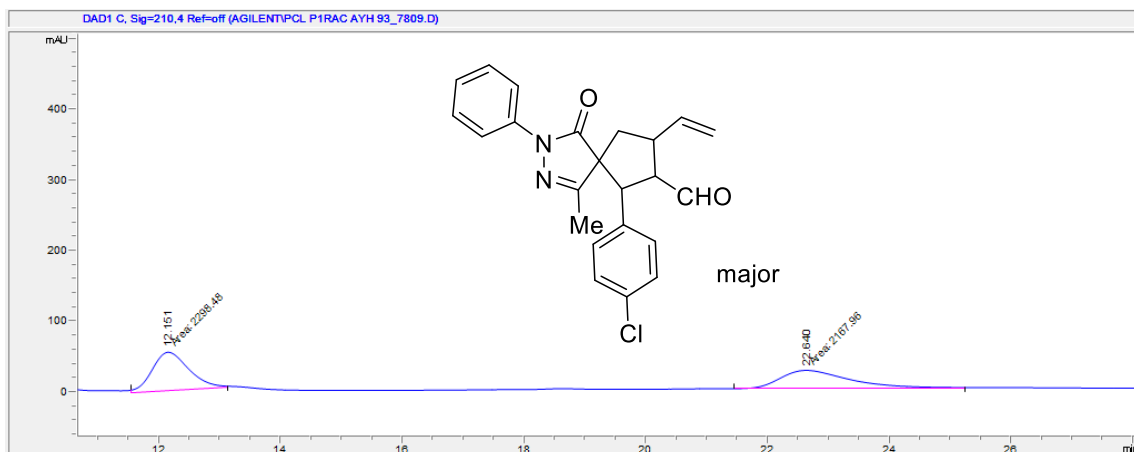

| Peak # | RetTime [min] | Type | Width [min] | Area [mAU*s] | Height [mAU] | Area %  |
|--------|---------------|------|-------------|--------------|--------------|---------|
| 1      | 12.151        | MM   | 0.7036      | 2298.48462   | 54.44628     | 51.4612 |
| 2      | 22.640        | MM   | 1.3789      | 2167.95752   | 26.20407     | 48.5388 |

Chiral S-catalyst **3i** major:

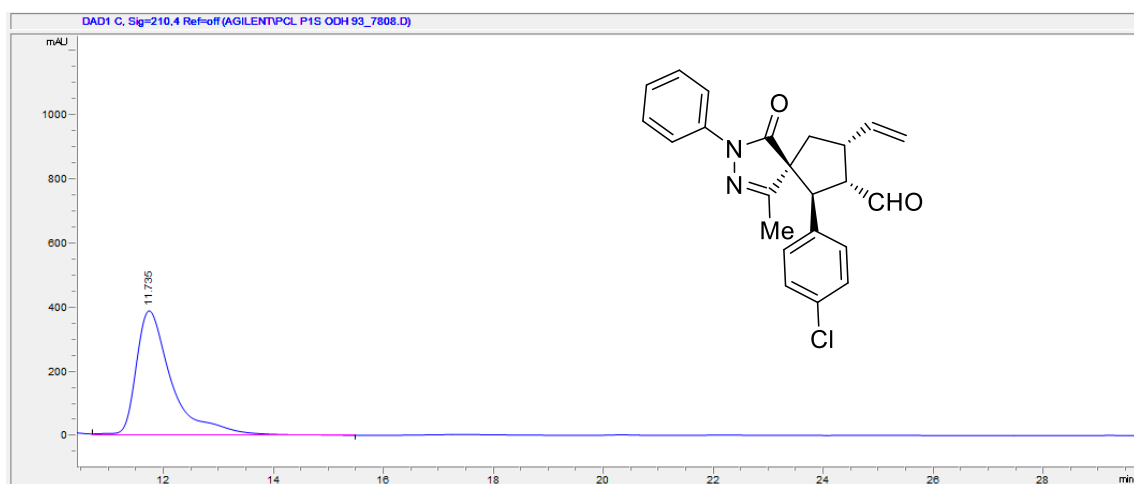

| Peak # | RetTime [min] | Type | Width [min] | Area [mAU*s] | Height [mAU] | Area %   |
|--------|---------------|------|-------------|--------------|--------------|----------|
| 1      | 11.735        | VB   | 0.6688      | 1.73813e4    | 386.37878    | 100.0000 |



Racemic **3j**:

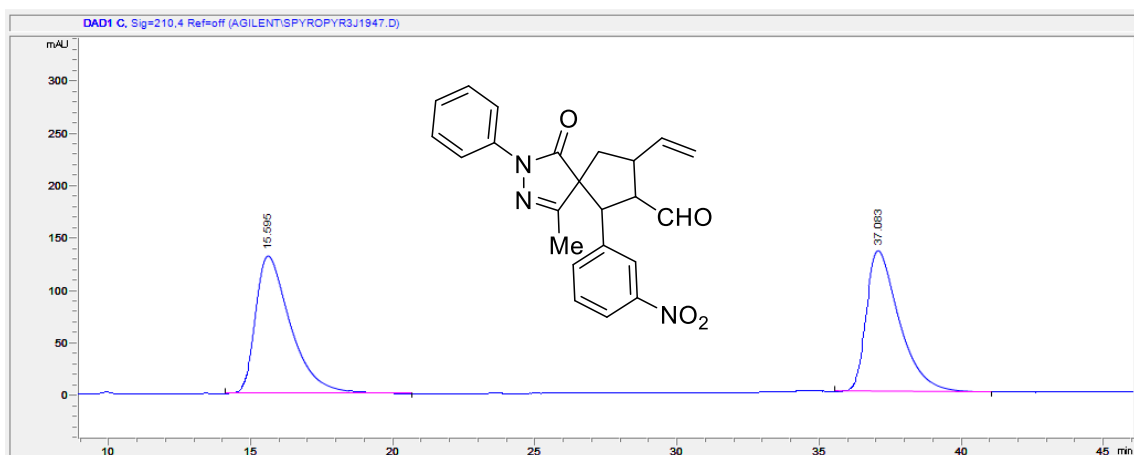

| Peak # | RetTime [min] | Type | Width [min] | Area [mAU*s] | Height [mAU] | Area %  |
|--------|---------------|------|-------------|--------------|--------------|---------|
| 1      | 15.595        | BB   | 1.2631      | 1.13974e4    | 131.76584    | 50.6251 |
| 2      | 37.083        | BB   | 1.2197      | 1.11160e4    | 134.84590    | 49.3749 |

Chiral S-catalyst **3j**:

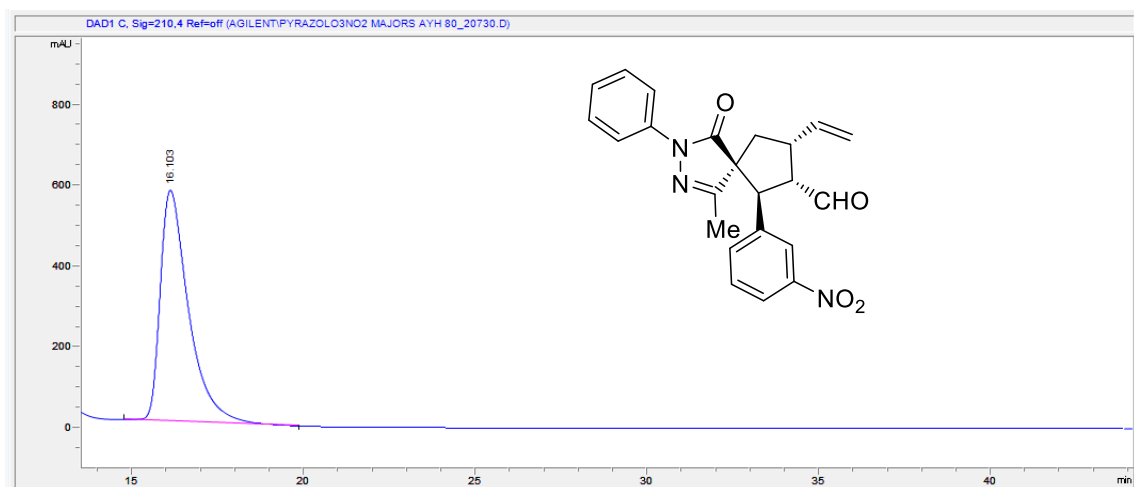

| Peak # | RetTime [min] | Type | Width [min] | Area [mAU*s] | Height [mAU] | Area %   |
|--------|---------------|------|-------------|--------------|--------------|----------|
| 1      | 16.103        | BB   | 0.8641      | 3.29665e4    | 572.22900    | 100.0000 |

Enantiomeric mixture **3k**:

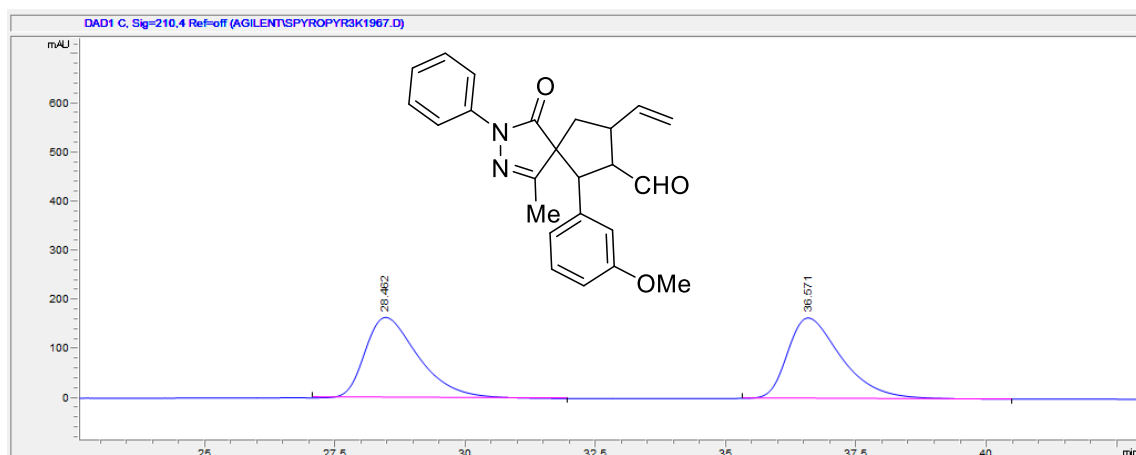

| Peak # | RetTime [min] | Type | Width [min] | Area [mAU*s] | Height [mAU] | Area %  |
|--------|---------------|------|-------------|--------------|--------------|---------|
| 1      | 28.462        | BB   | 1.0858      | 1.18367e4    | 164.83888    | 49.9541 |
| 2      | 36.571        | BB   | 1.0719      | 1.18584e4    | 164.71542    | 50.0459 |

Chiral S-catalyst **3k**:

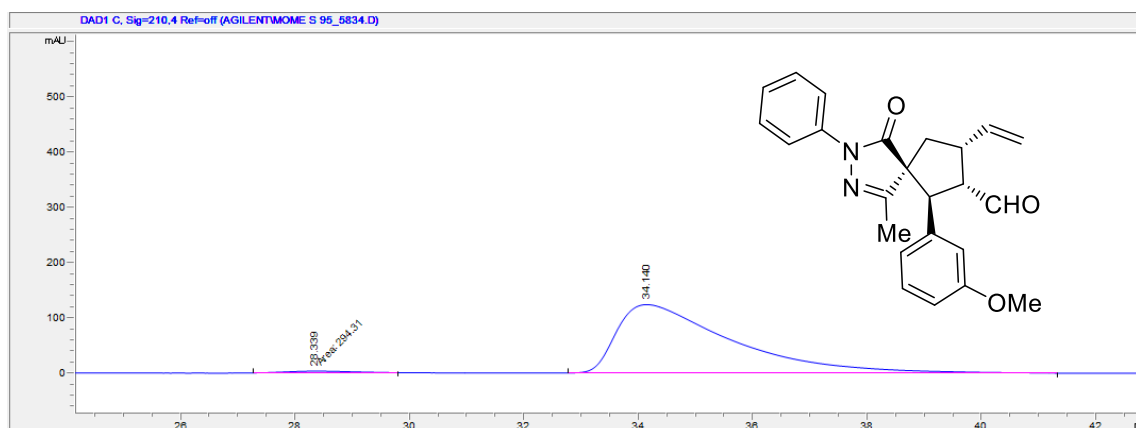

| Peak # | RetTime [min] | Type | Width [min] | Area [mAU*s] | Height [mAU] | Area %  |
|--------|---------------|------|-------------|--------------|--------------|---------|
| 1      | 28.339        | MM   | 1.4481      | 294.31003    | 3.38724      | 1.6816  |
| 2      | 34.140        | BB   | 1.8371      | 1.72073e4    | 123.83883    | 98.3184 |

Racemic **3m**:

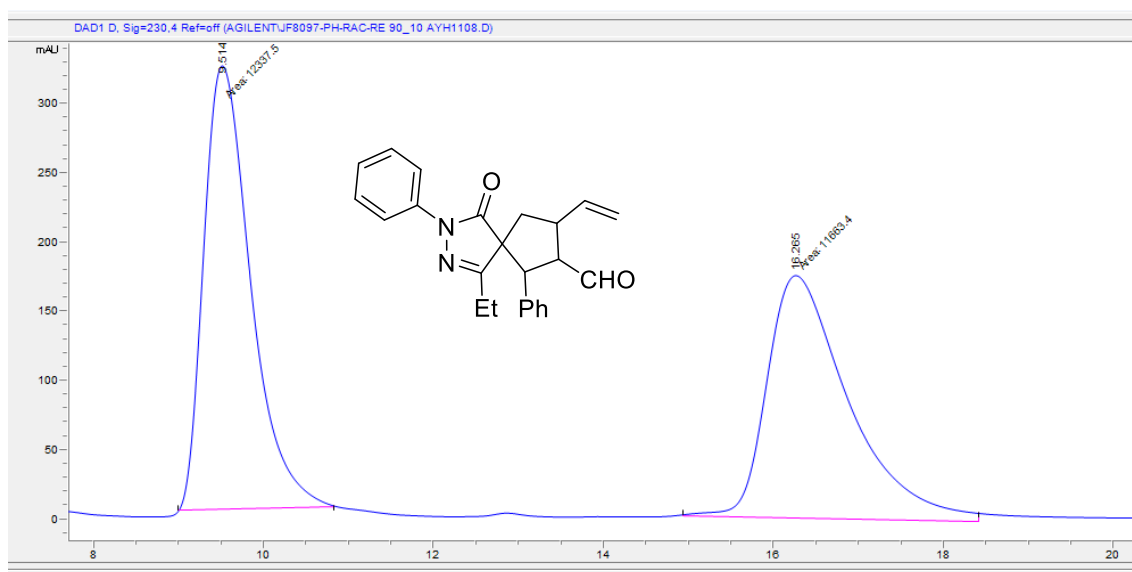

| Peak # | RetTime [min] | Type | Width [min] | Area [mAU*s] | Height [mAU] | Area %  |
|--------|---------------|------|-------------|--------------|--------------|---------|
| 1      | 9.514         | PM   | 0.6417      | 1.23375e4    | 320.44287    | 51.4042 |
| 2      | 16.265        | MM   | 1.1116      | 1.16634e4    | 174.87427    | 48.5958 |

Chiral S-catalyst **3m**:

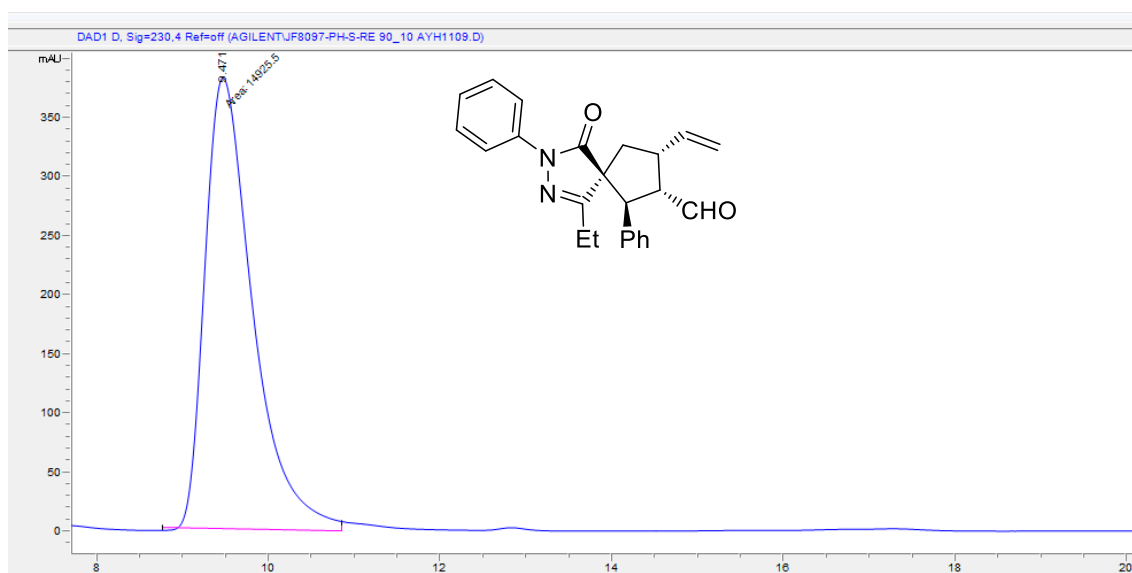

| Peak # | RetTime [min] | Type | Width [min] | Area [mAU*s] | Height [mAU] | Area %   |
|--------|---------------|------|-------------|--------------|--------------|----------|
| 1      | 9.471         | MM   | 0.6475      | 1.49255e4    | 384.20035    | 100.0000 |

Racemic **3n**:

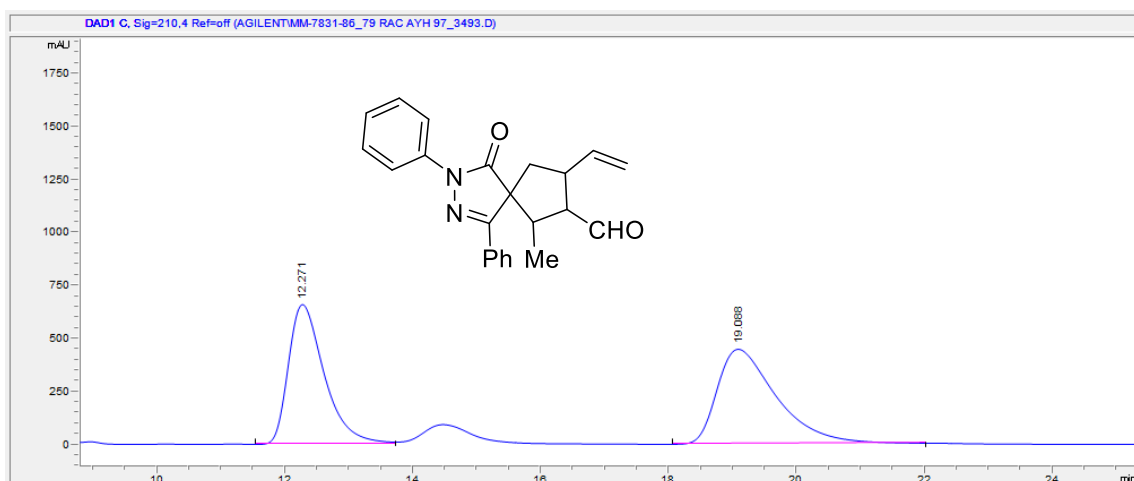

| Peak # | RetTime [min] | Type | Width [min] | Area [mAU*s] | Height [mAU] | Area %  |
|--------|---------------|------|-------------|--------------|--------------|---------|
| 1      | 12.271        | VV   | 0.5940      | 2.59211e4    | 660.24951    | 47.3973 |
| 2      | 19.088        | BB   | 0.9708      | 2.87679e4    | 447.04059    | 52.6027 |

Chiral S-catalyst **3n**:

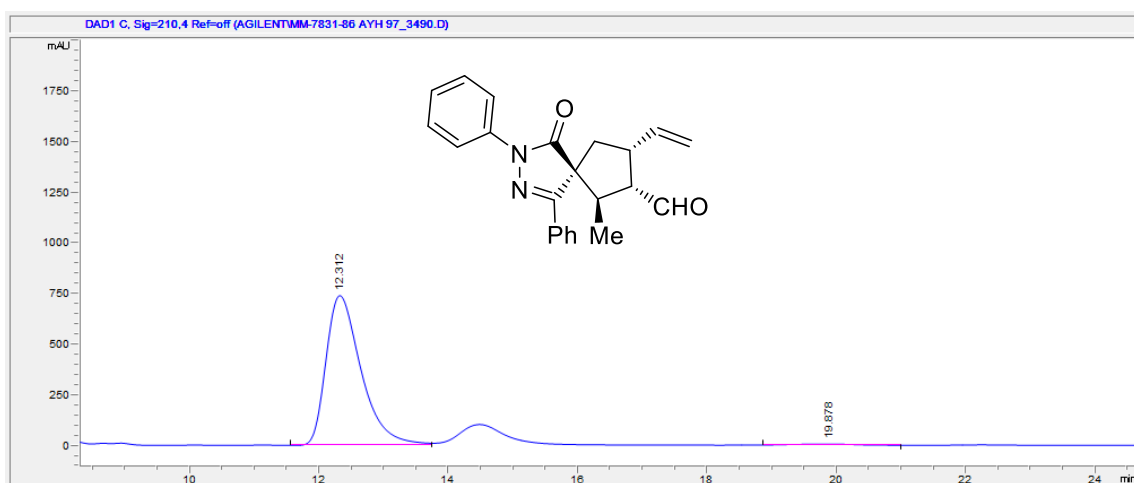

| Peak # | RetTime [min] | Type | Width [min] | Area [mAU*s] | Height [mAU] | Area %  |
|--------|---------------|------|-------------|--------------|--------------|---------|
| 1      | 12.312        | BV   | 0.5764      | 2.79338e4    | 740.02509    | 98.9898 |
| 2      | 19.878        | BB   | 0.7103      | 285.07062    | 4.78994      | 1.0102  |

Racemic **3o**:

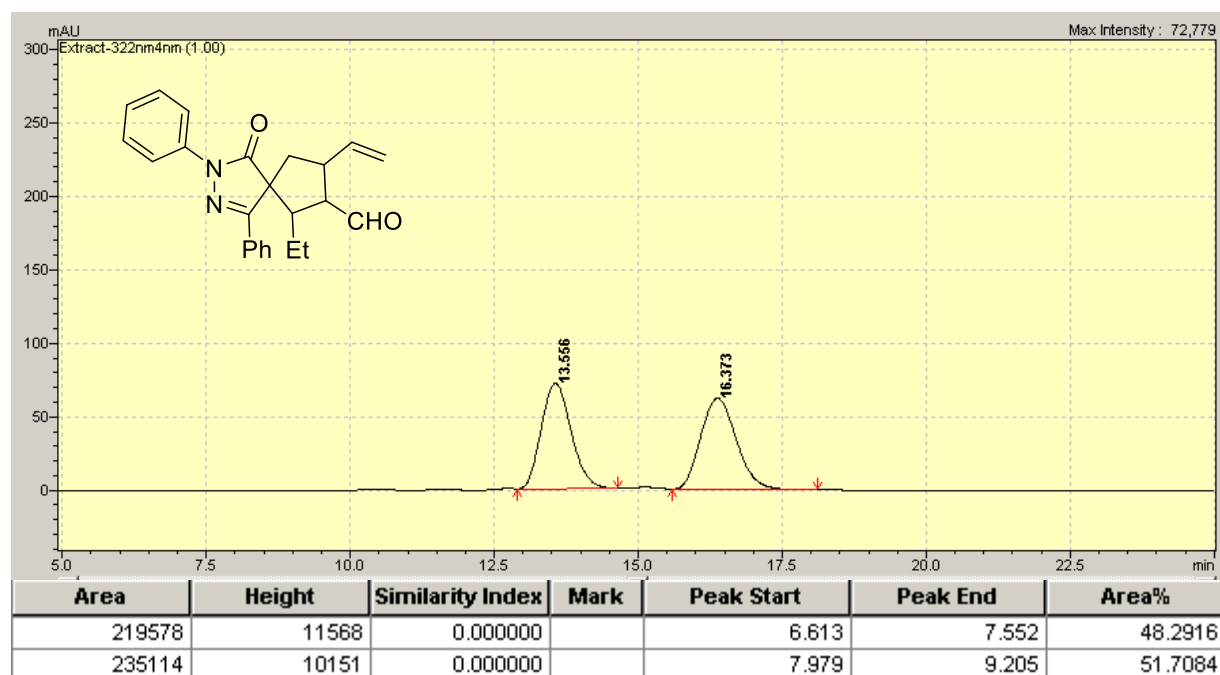

Chiral S-catalyst **3o**:

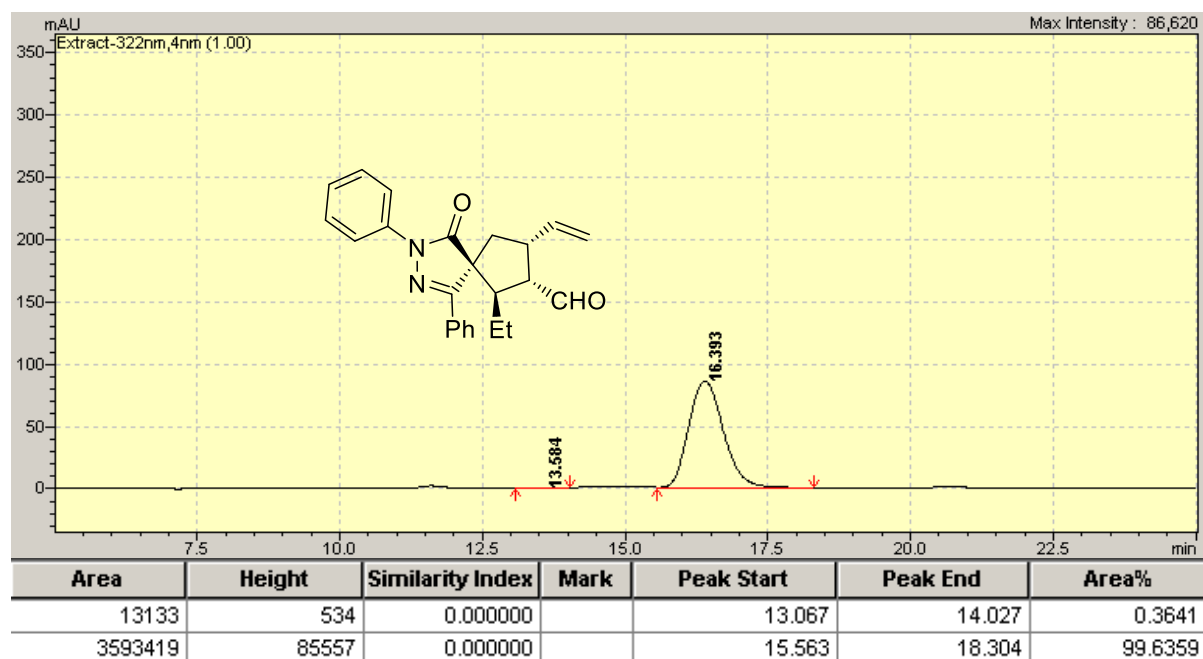

### Racemic **3p**:

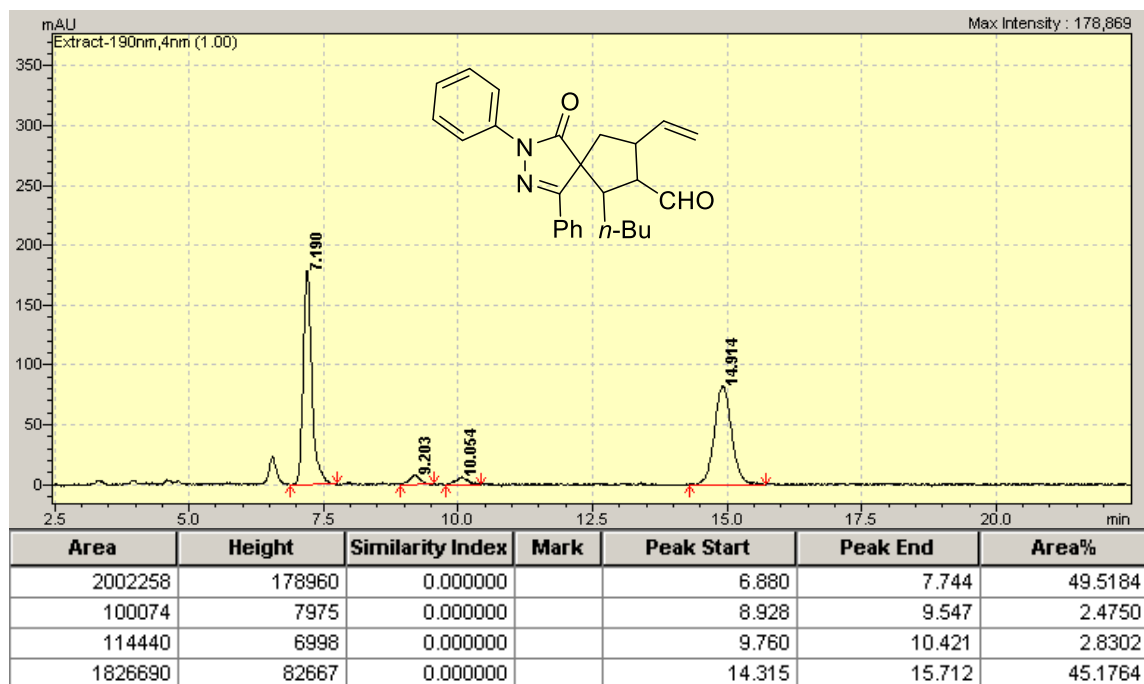

### Chiral S-catalyst **3p**:

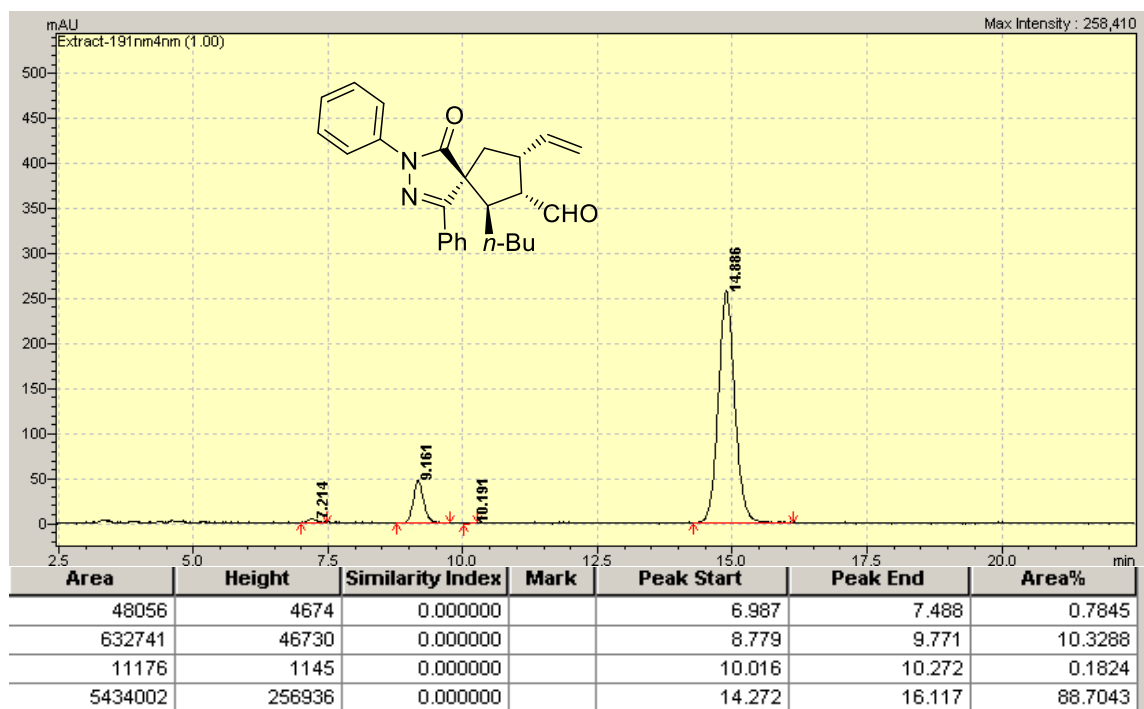

### Racemic **3q**:

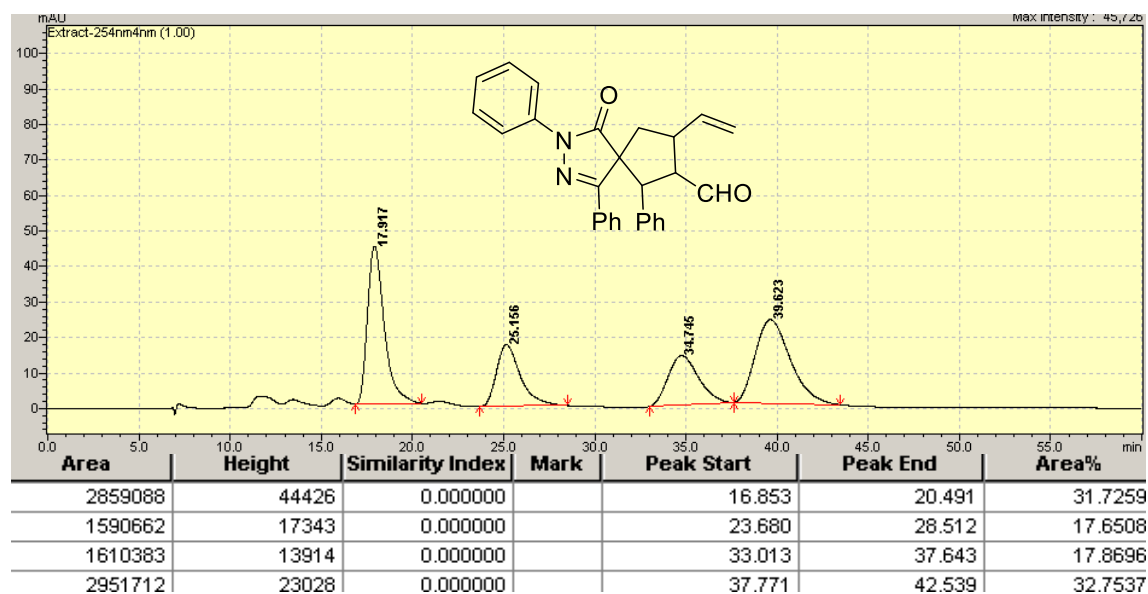

### Chiral S-catalyst **3q**:

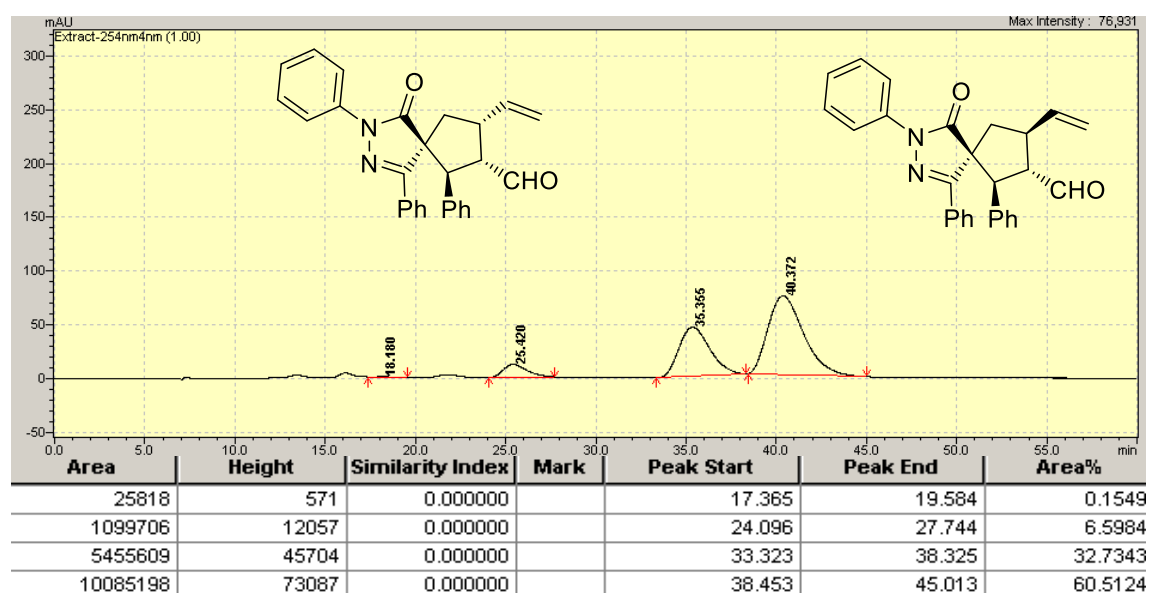

### Racemic **3r**:

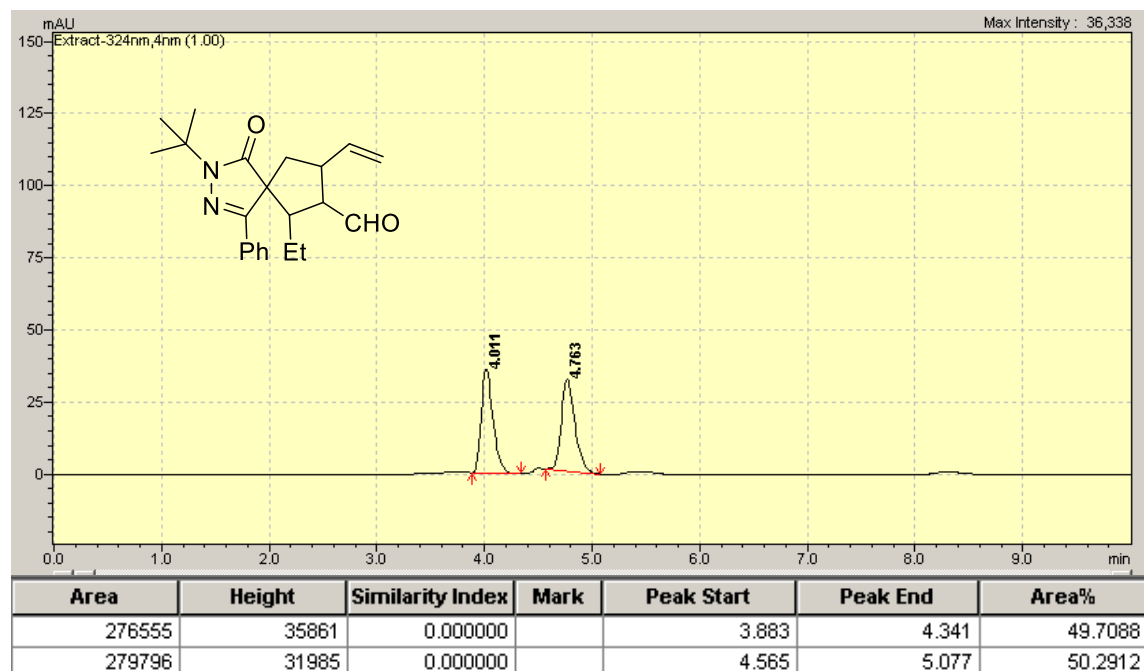

### Chiral S-catalyst **3r**:

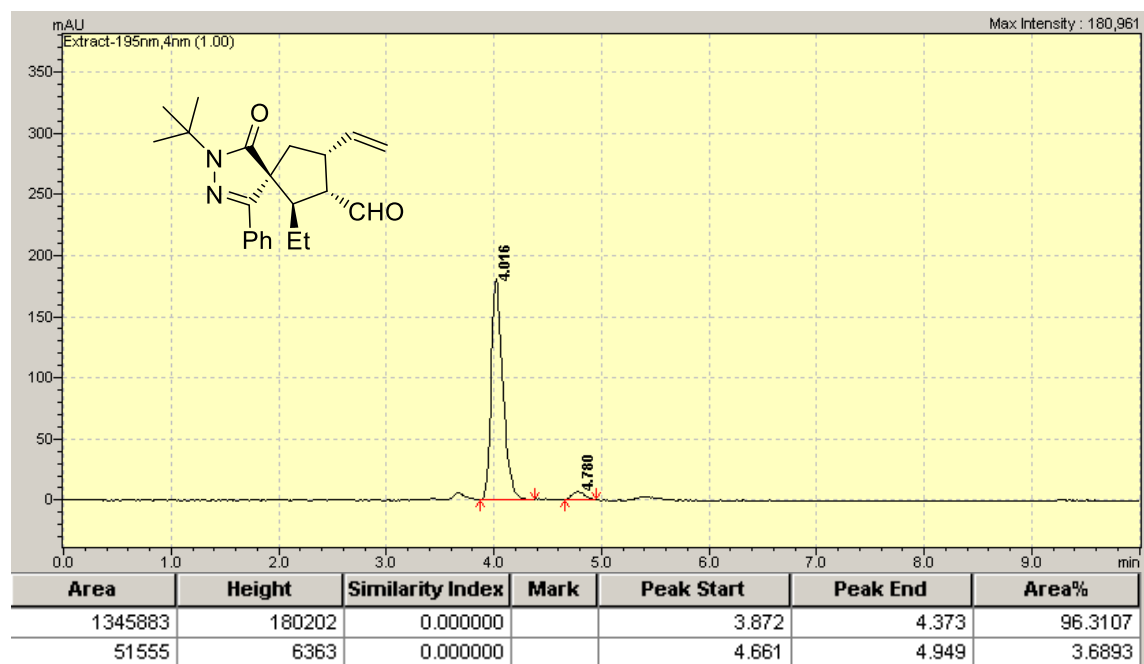



### Racemic **3s**:

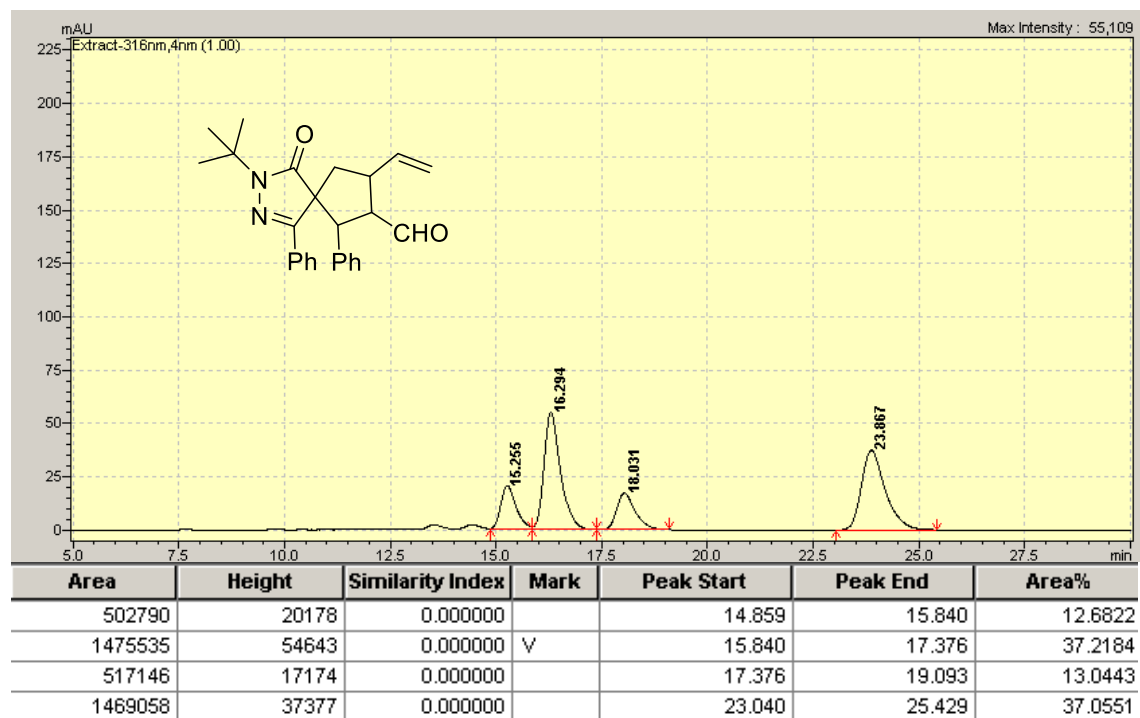

### Chiral S-catalyst **3s**:

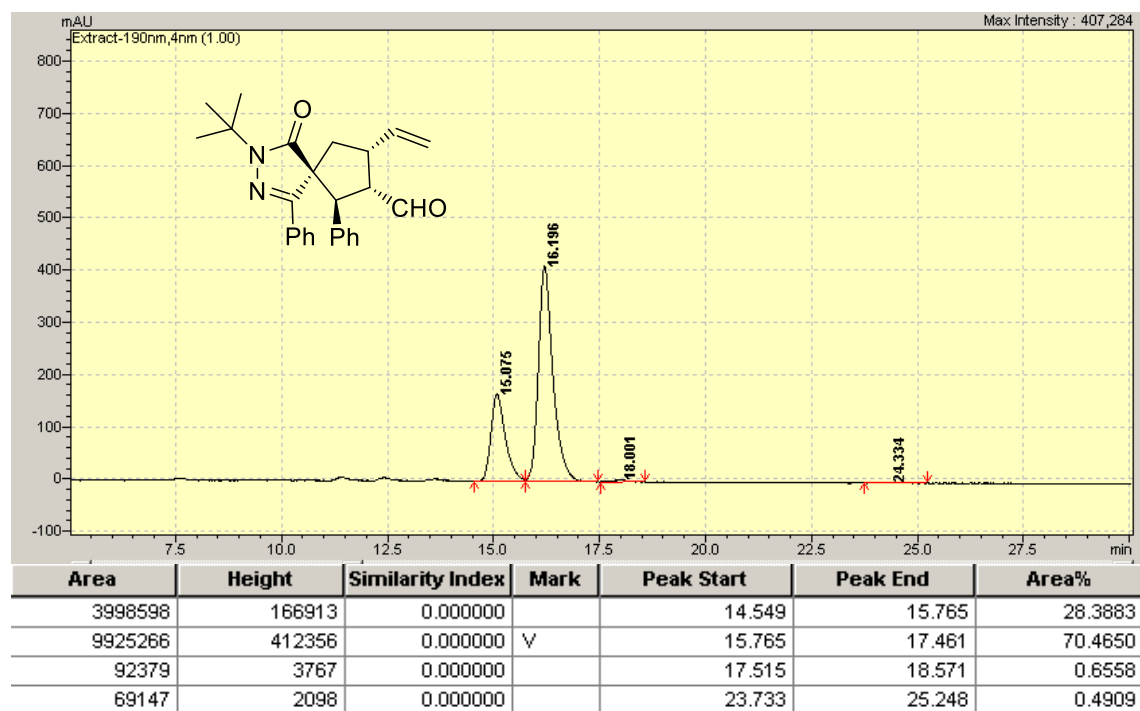

### Racemic **3t**:

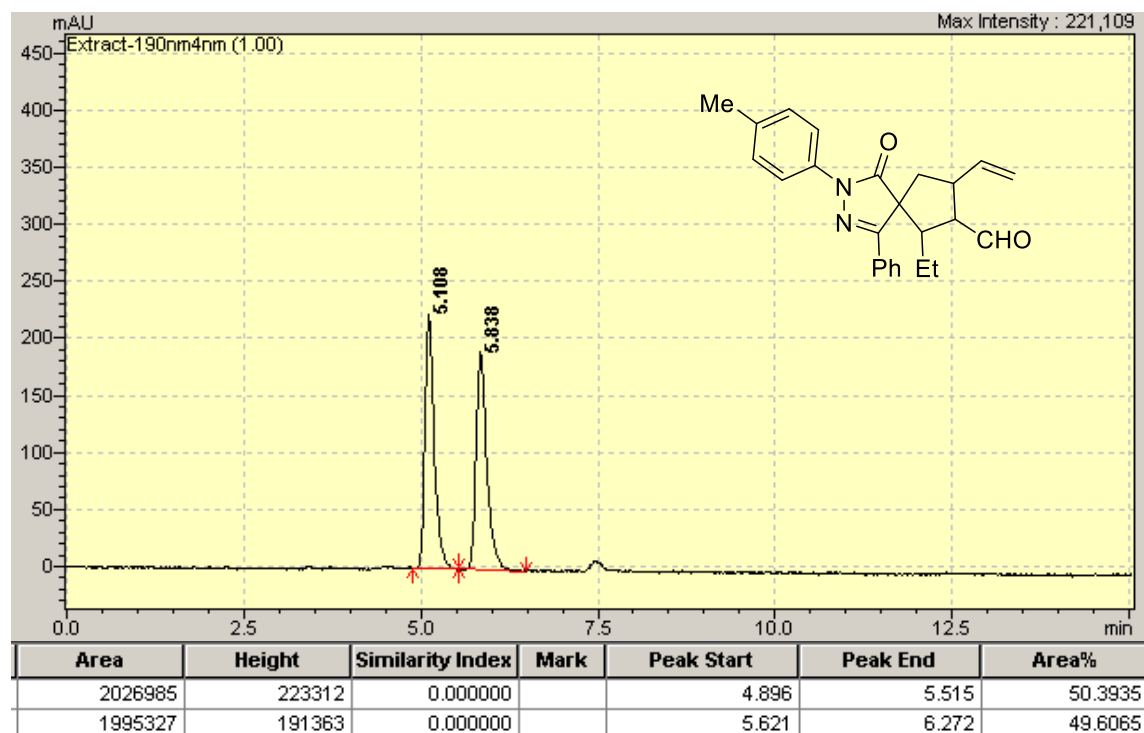

### Chiral S-catalyst **3t**:

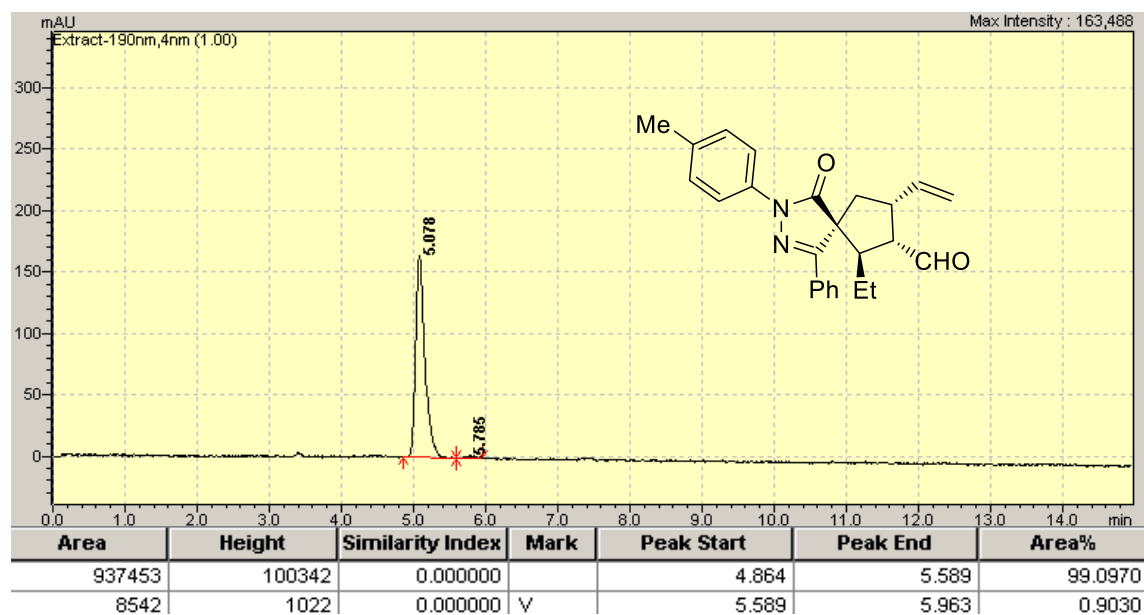

### Racemic **3u**:

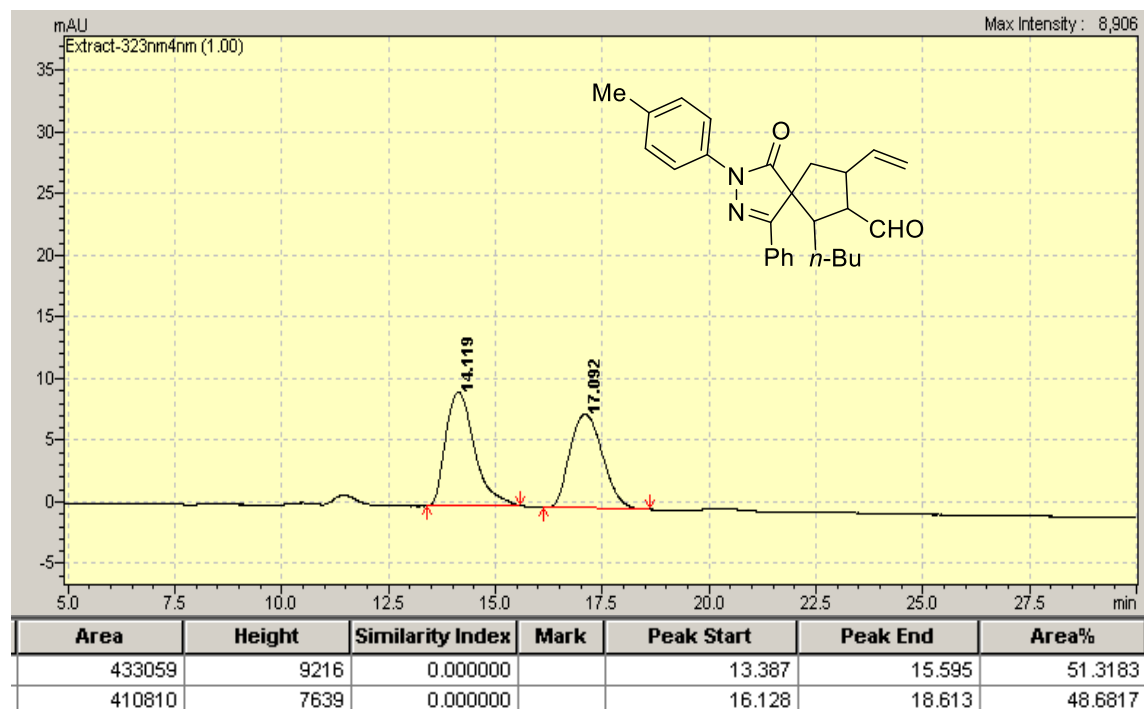

### Chiral S-catalyst **3u**:

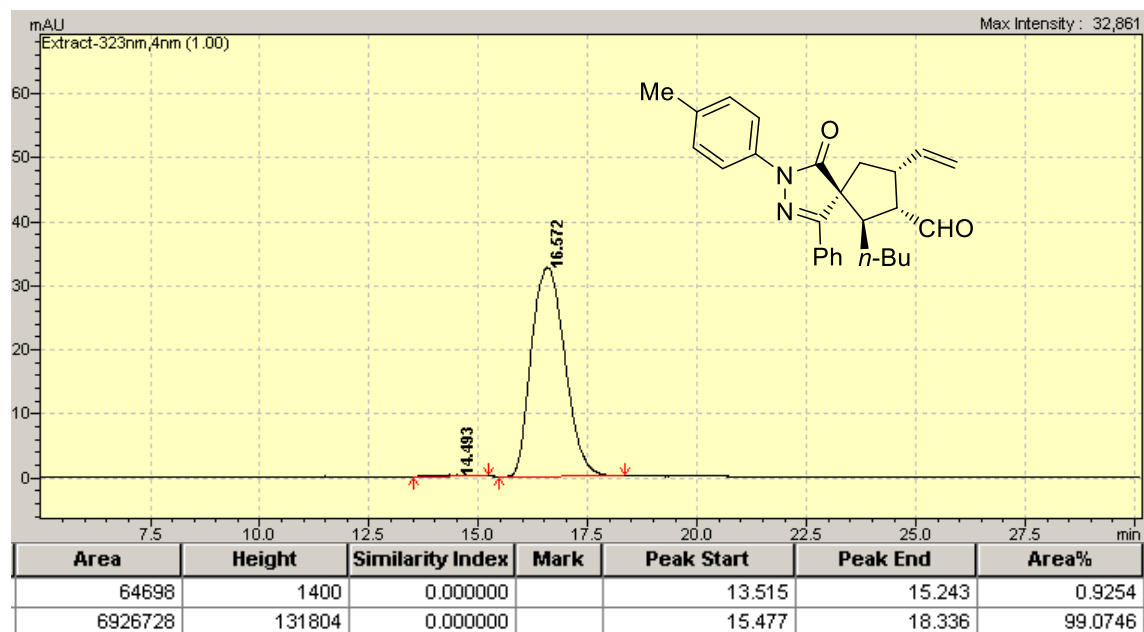

### Racemic **3v**:

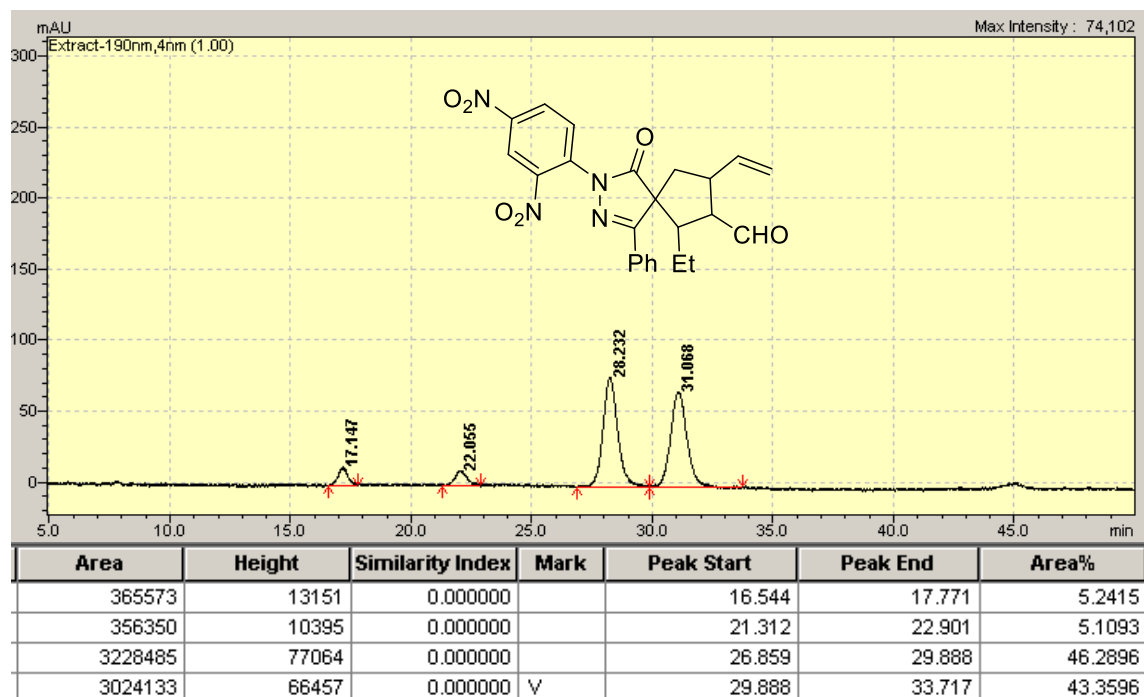

### Chiral S-catalyst **3v**:

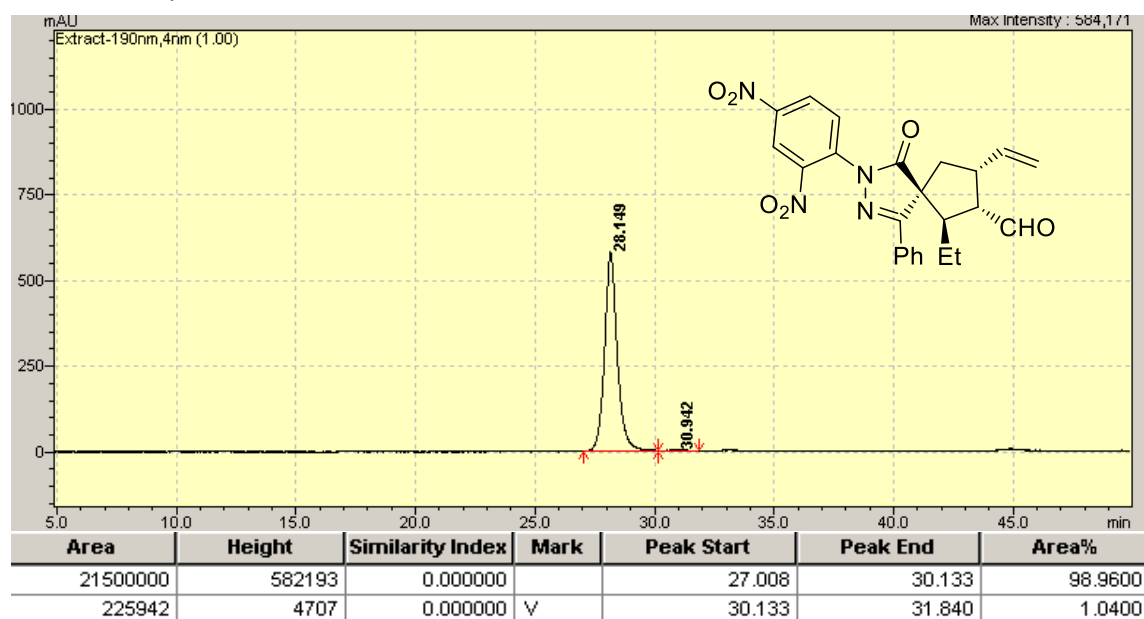

### Racemic **3w**:

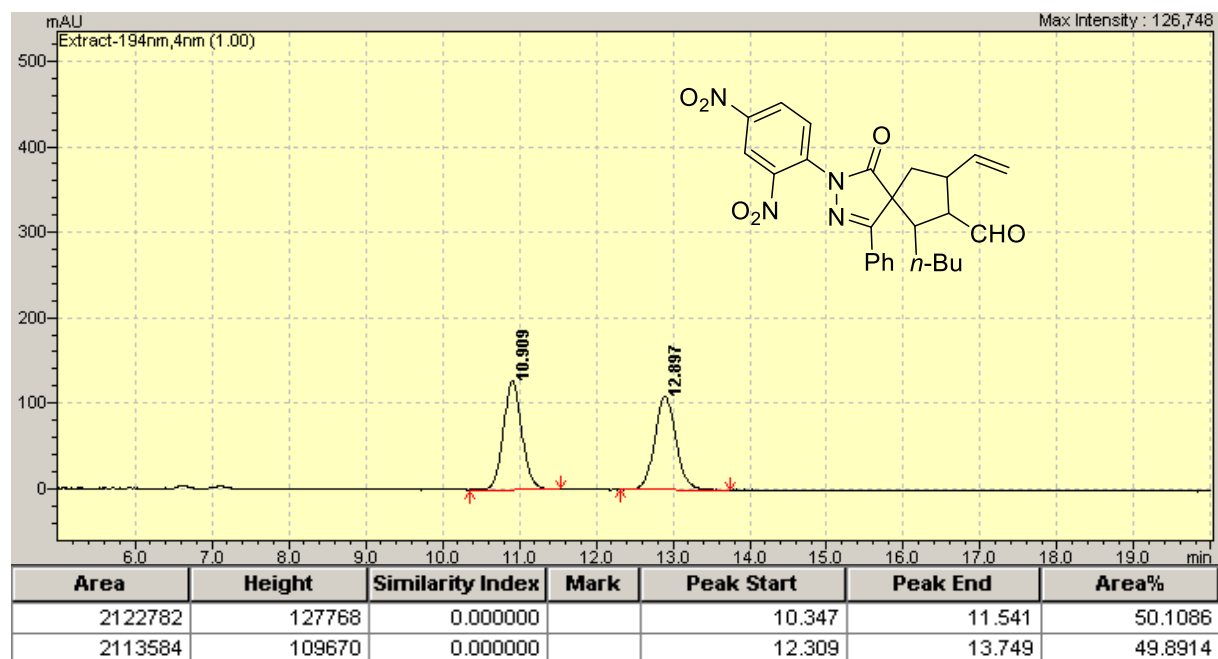

### Chiral S-catalyst **3w**:

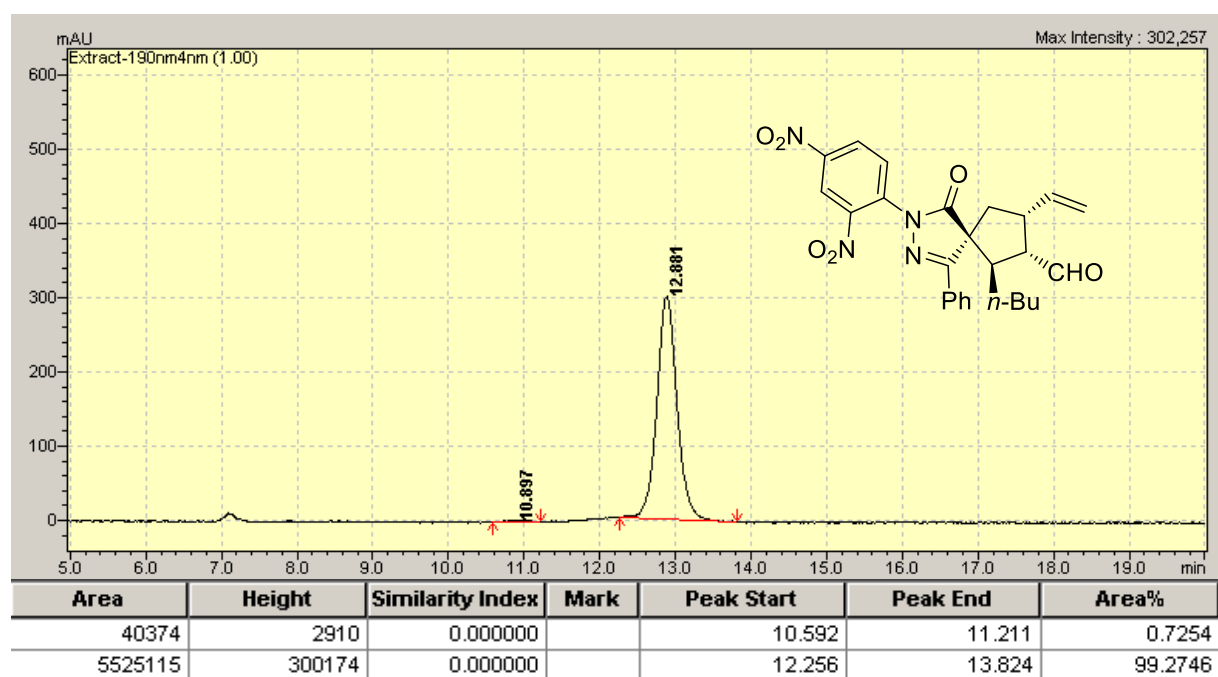

### Racemic **3x**:

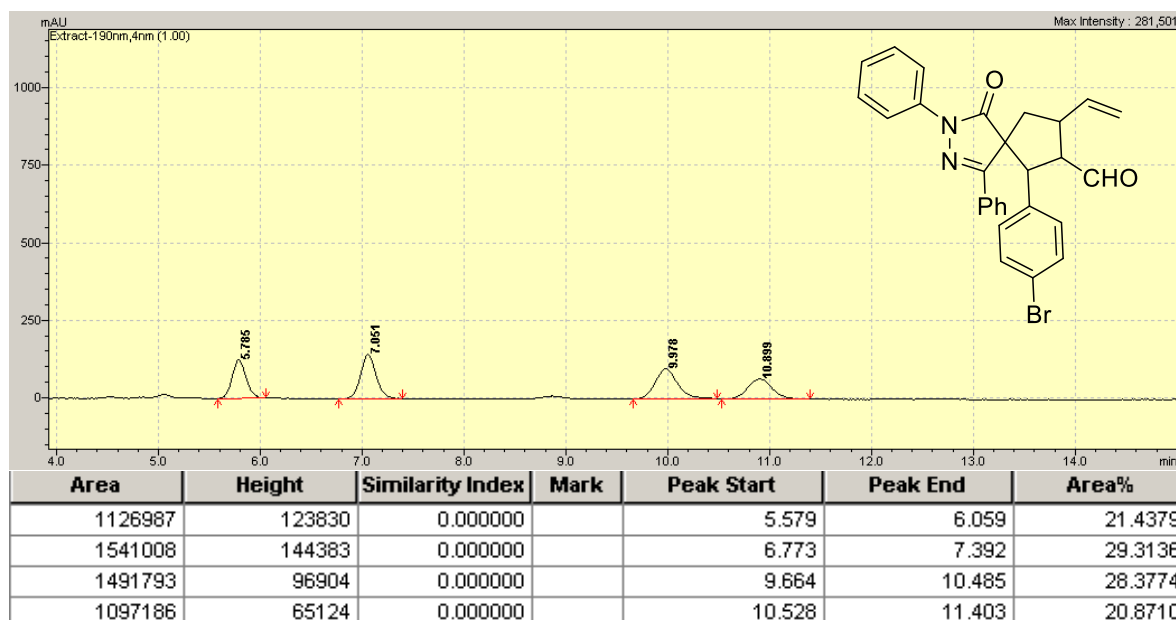

### Chiral S-catalyst **3x**:

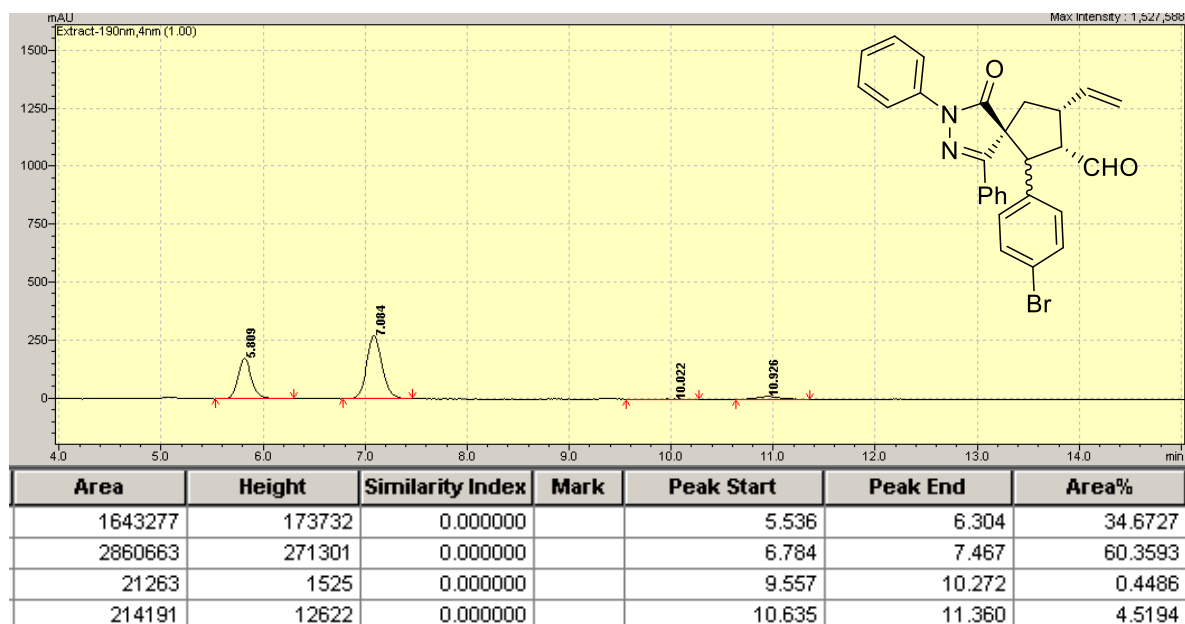

### Racemic 11:

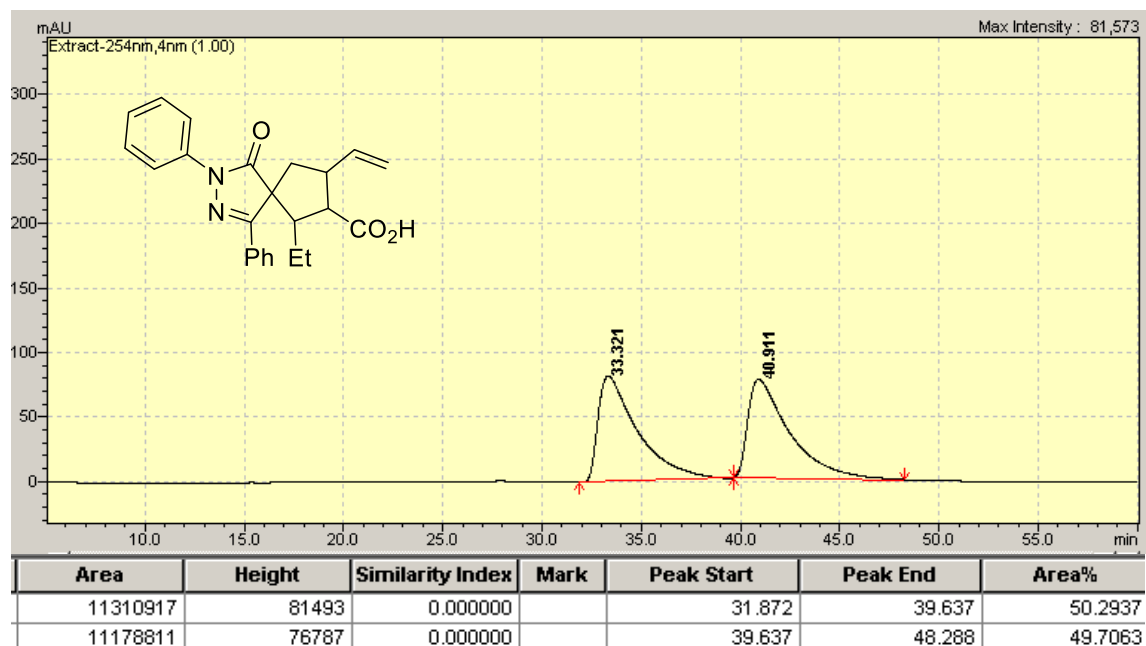

### Chiral 11:

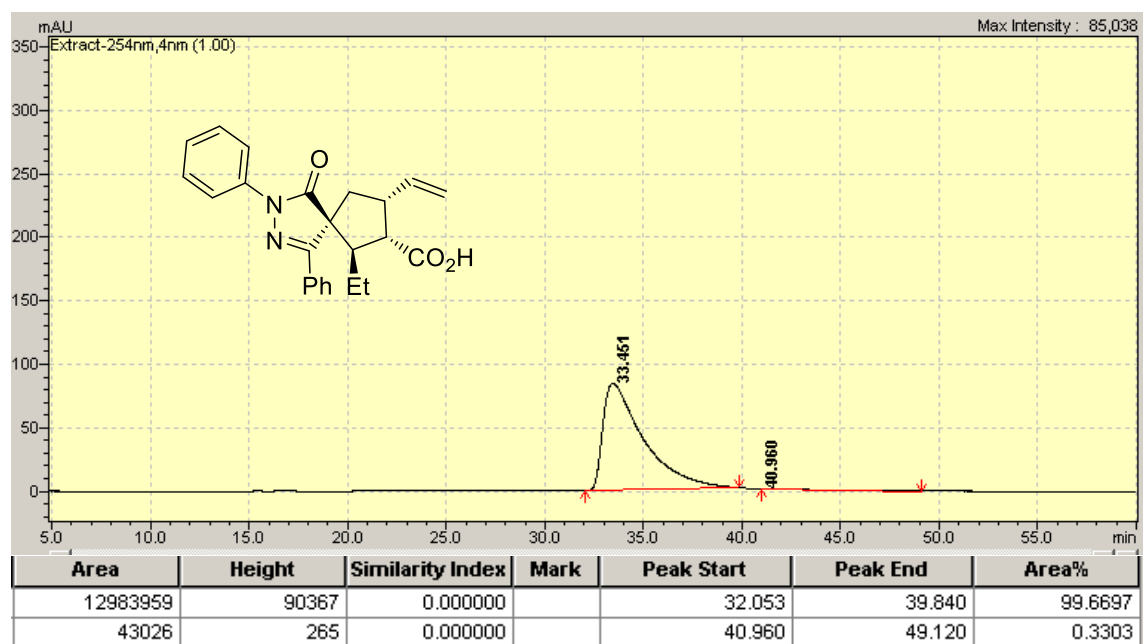

# Racemic **12 dia 1**:

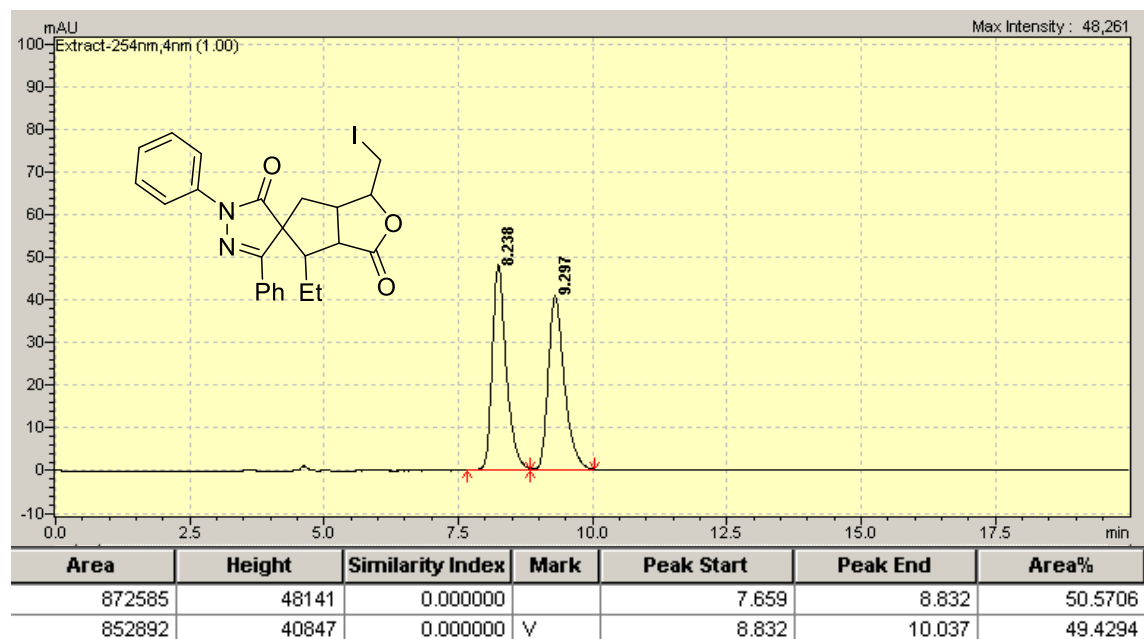

# Chiral **12 dia 1**:

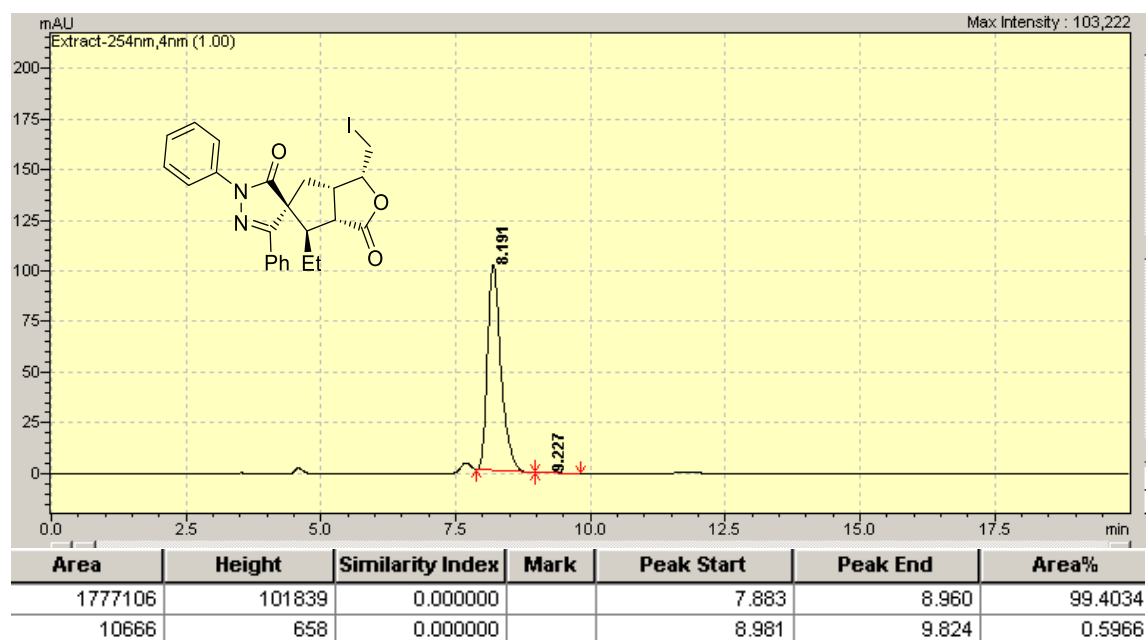



# Racemic **12 dia 2**:

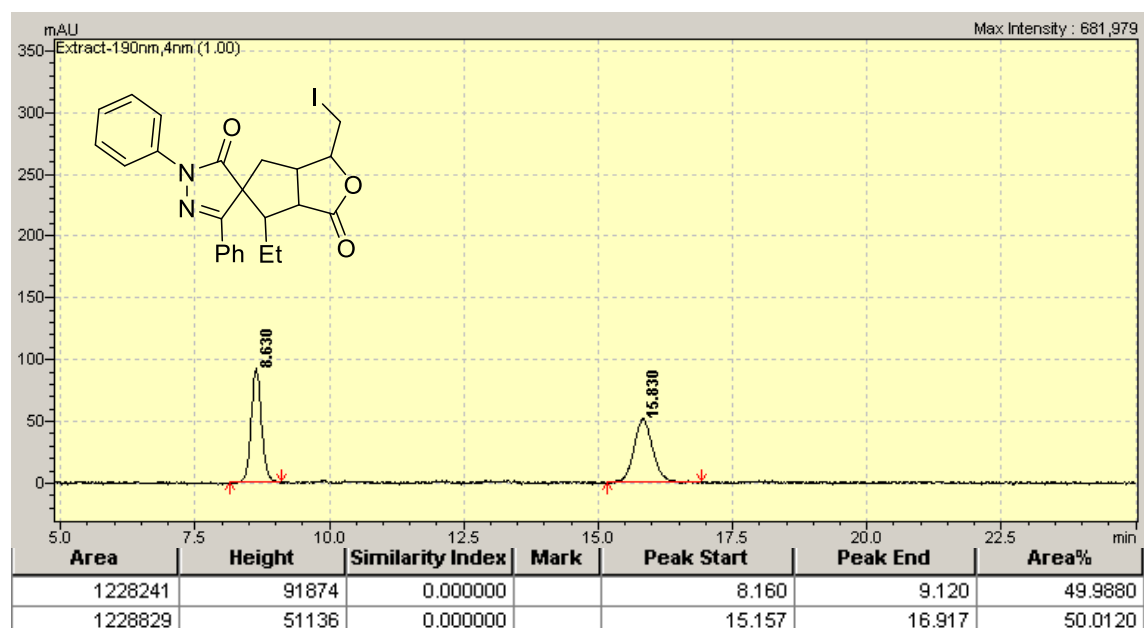

# Racemic **12 dia 2**:

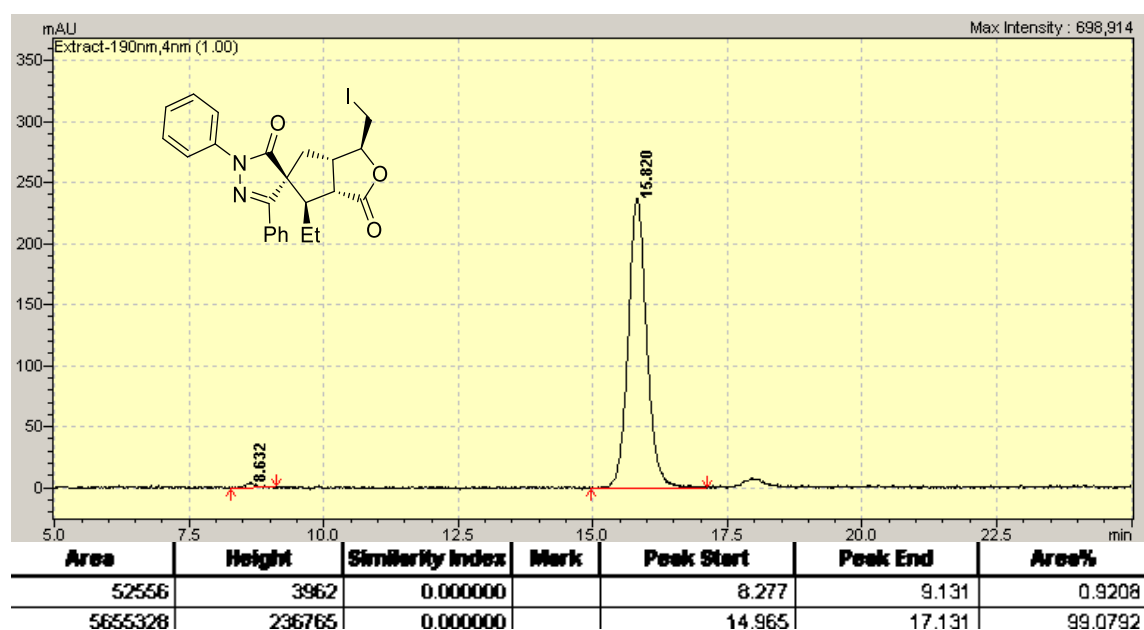

### Racemic 13:

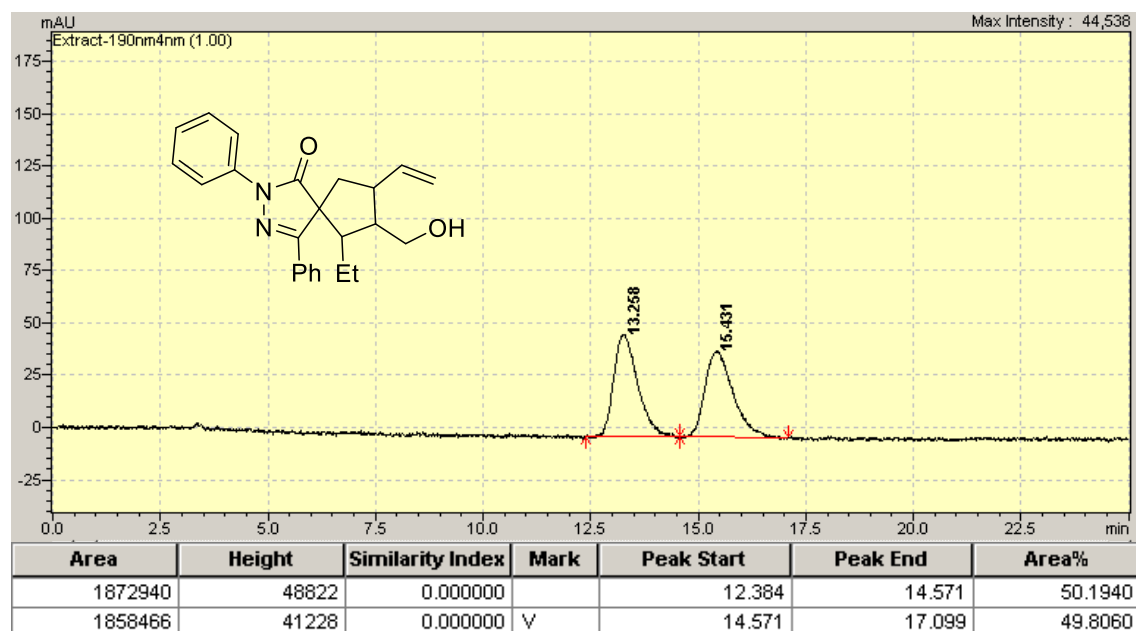

### Chiral 13:

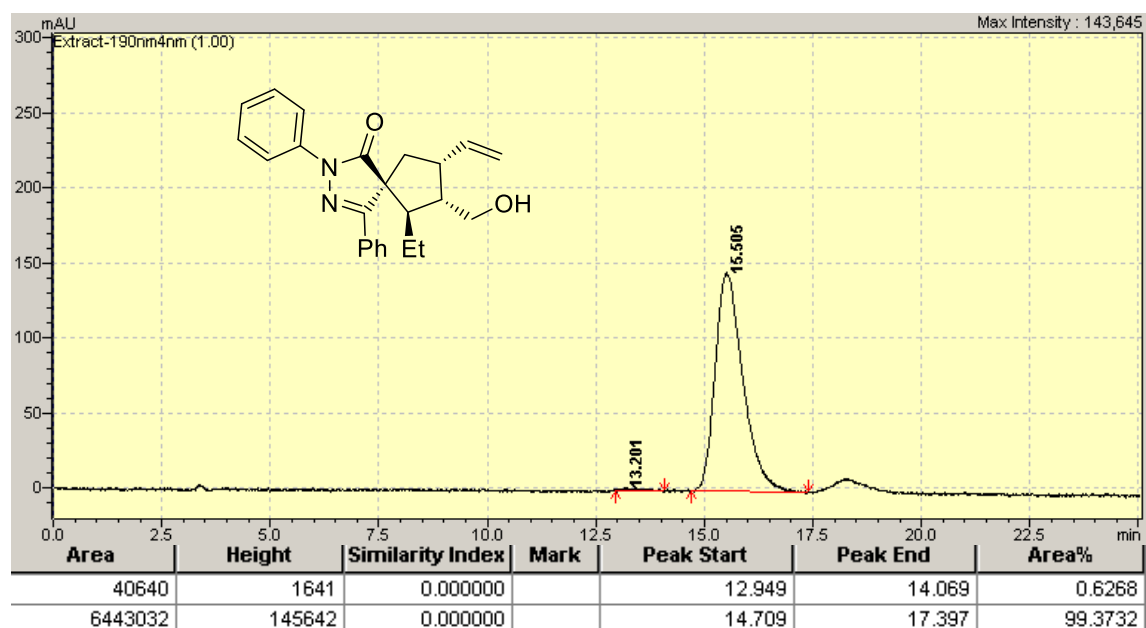

# Racemic **14**:

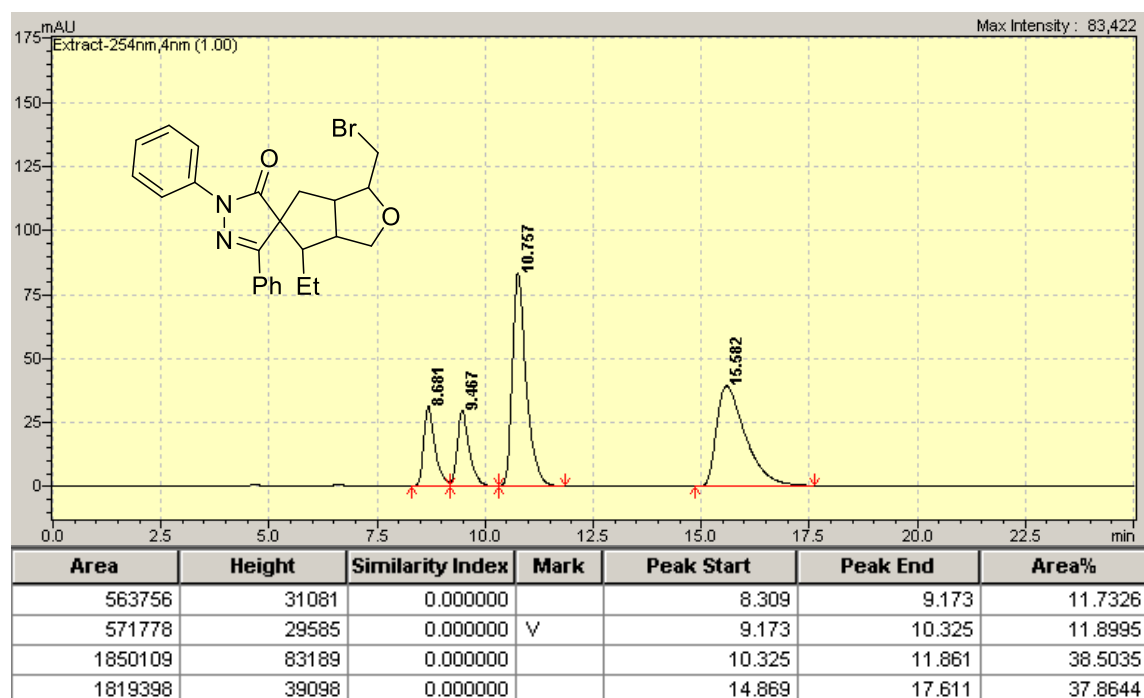

# Chiral **14**:

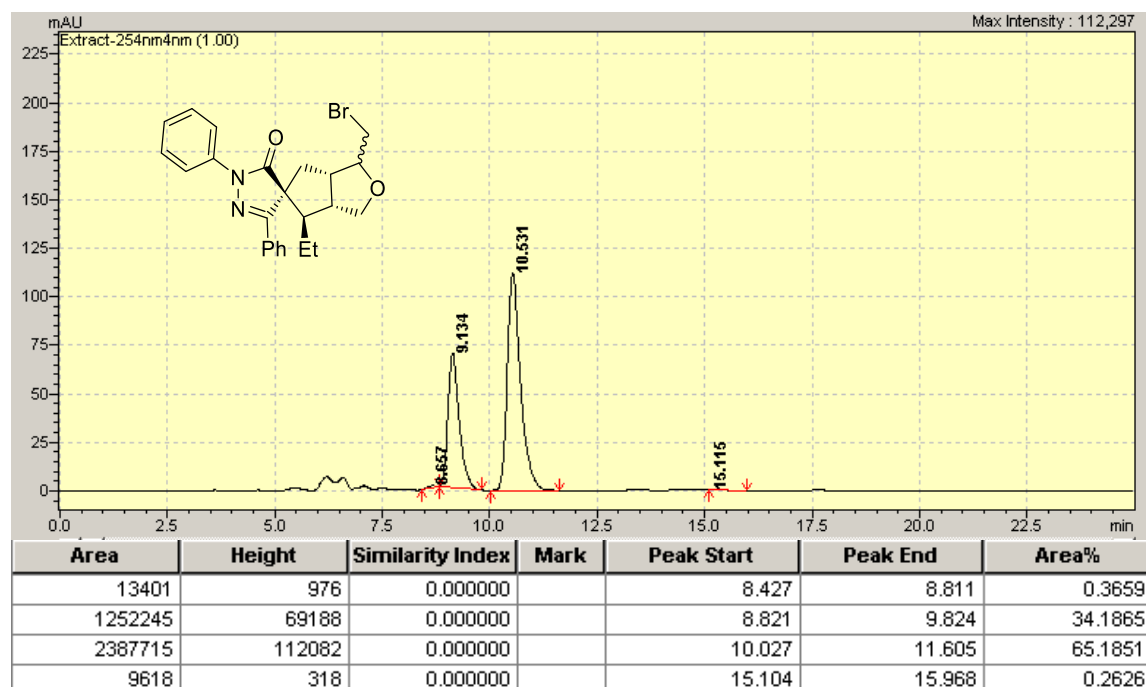

### Racemic 16:

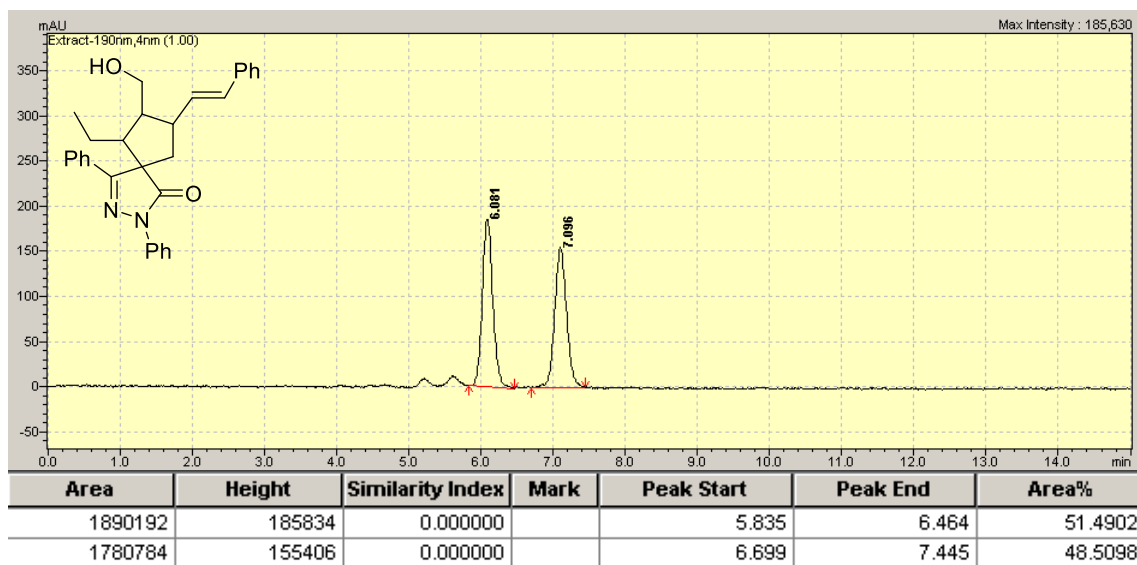

### Chiral 16:

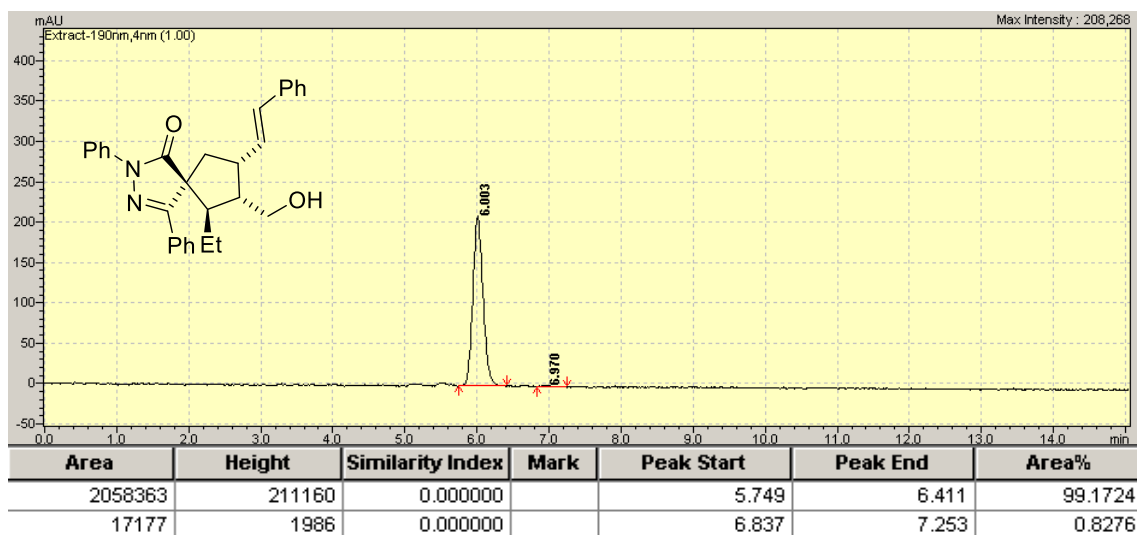

### Racemic 17:

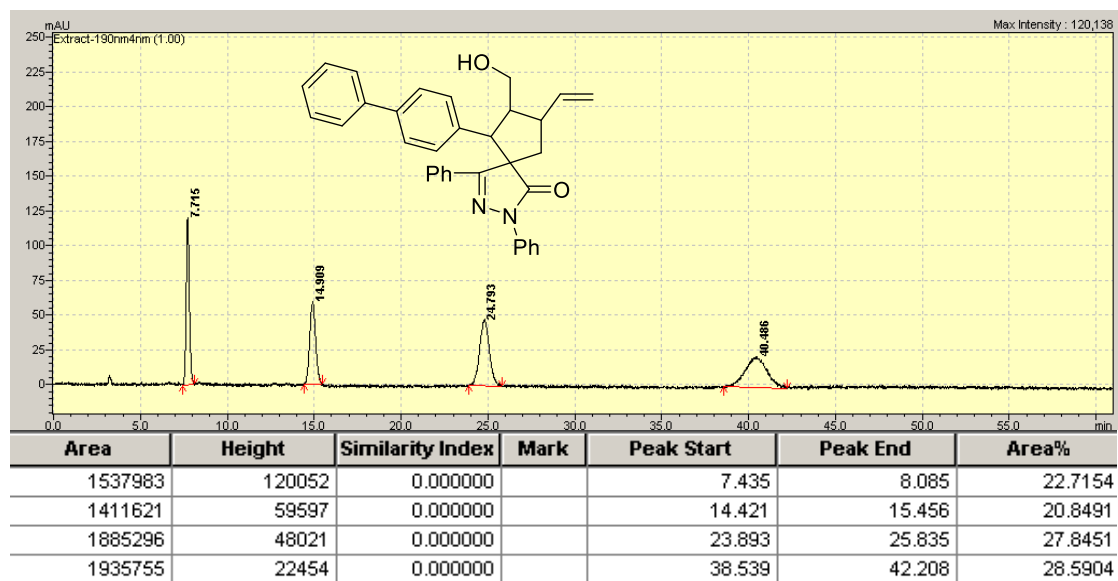

### Chiral 17:

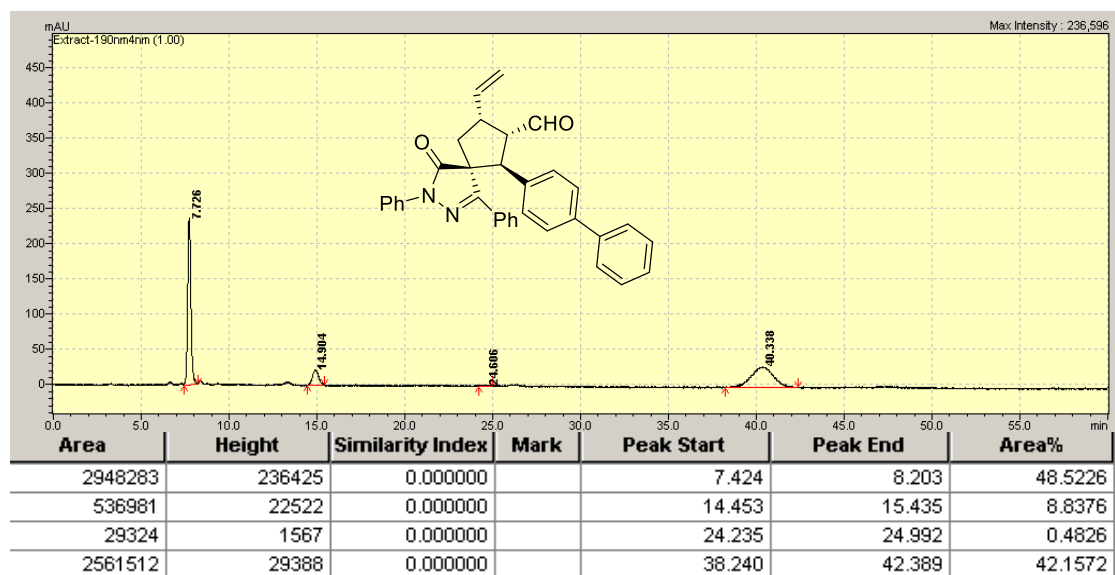

## 9. Mass spectrometry experiments

### Preparation of reaction mixtures for mass spectrometry experiments

A) The solution of the catalyst was prepared by dissolving 2 mg of  $\text{Pd}_2(\text{dba})_3$  (5 mol% equiv) in 2 ml of dichloromethane. The solution of catalysts was filtered. The solution of reactant was prepared by dissolving 20 mg of pyrazolone **1a** (2 equiv, 0.09 mmol), 6 mg of cinnamaldehyde (1 equiv, 0.045 mmol), and 3 mg of Jorgensen (2-(diphenyl((trimethylsilyl)oxy)methyl)pyrrolidine) (20 mol% equiv, 0.009 mmol) in 2 ml of acetonitrile. The final solution was prepared by mixing of 0.5 ml of the solution of catalyst, 0.5 ml of the solution of reactant **1a**, Jorgensen-Hayashi catalyst, cinnamaldehyde, and 1.5 ml of acetonitrile.

B) The solution of the catalyst was prepared by dissolving 2 mg of  $\text{Pd}_2(\text{dba})_3$  (2.5 mol% equiv) in 2 ml of dichloromethane. The solution of catalysts was filtered. The solution of reactant was prepared by dissolving 20 mg of pyrazolone **1a** (1 equiv, 0.09 mmol) in 2 ml of acetonitrile. The final solution was prepared by mixing of 0.5 ml of the solution of catalyst, 0.5 ml of the solution of reactant, and 1.5 ml of acetonitrile.

### Mass spectrometric experiments

The experiments were performed with a TSQ 7000 mass spectrometer with a quadrupole-octopole-quadrupole configuration. The ions were generated by electrospray ionization (ESI) from the reaction mixtures described above at soft ionization condition (low potentials on the entrance ion optics and the temperature of the capillary was 200 °C).

### Results of mass spectrometry experiments

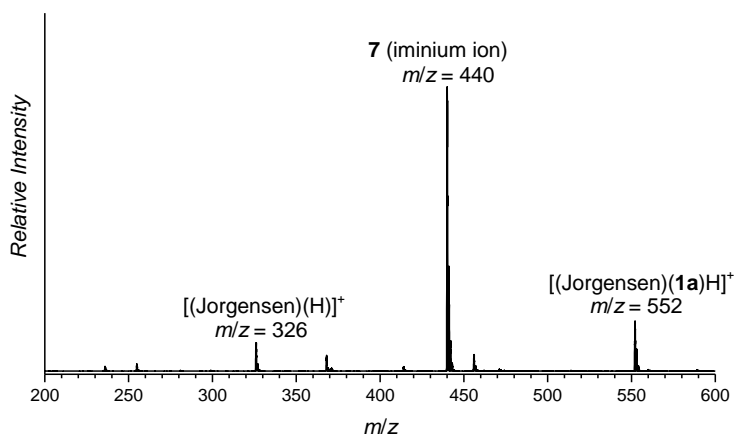

**Figure S20.** ESI-MS source spectrum of the solution of pyrazolone (**1a**), Jorgensen catalyst, cinnamaldehyde, and  $\text{Pd}_2(\text{dba})_3$  in acetonitrile.

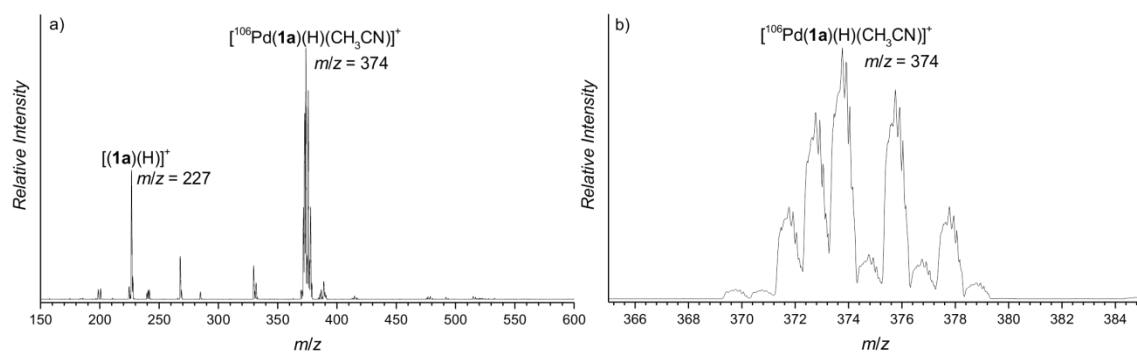

**Figure S21.** a) ESI-MS source spectrum of the final solution of pyrazolone (**1a**) with the catalyst  $\text{Pd}_2(\text{dba})_3$  in acetonitrile. b) Isotope pattern of the complex  $[\text{Pd}(\mathbf{1a})(\text{H})(\text{CH}_3\text{CN})]^+$  ( $m/z = 374$ ).

## 10. Infrared photodissociation (IRPD) spectroscopy and theoretical calculations

### IRPD experiments

The experiments were performed with the ISORI instrument. ISORI is based on the combination of a low-temperature ion trap with a commercial TSQ 7000 instrument. In its original design TSQ 7000 has a quadrupole-octopole-quadrupole geometry. The original ion source vacuum chamber is connected to the main instrument via a customized flange. It preserves all of the ionization options provided by TSQ – here the electrospray ionization equipment is used. The new ultra-high vacuum chamber consists of three additional differentially pumped regions: 1) the region with the first quadrupole ( $4P_1$ ), the quadrupole bender (QPB), and the octopole (8P), 2) the region with the ion trap (w4PT), and 3) the second quadrupole ( $4P_2$ ) and the detector. The ion trap has a linear quadrupole geometry where the hyperbolic shape of each electrode is approximated by six wires. It is mounted into a copper box, which is screwed onto a cold-head. The copper box reaches temperature of 2.6 K. Cooling of the ions is achieved by collisions with a helium buffer gas. The temperature of the box, surrounding the trap, and of the heat shield is measured by silicon-diode sensors. The buffer gas is injected by a custom-made piezo valve, situated in vacuum, directly into the trap with a straight Teflon tube. The presence of the He buffer gas leads to elevation of the trap temperature via convective heat transfer by several tens of Kelvin.

The ions of interest were obtained by electrospray ionization of final solution, which is described above. The ions of interest were mass-selected by the  $4P_1$ , deflected by the QPB, and guided by the 8P to the w4PT. During the first 300 ms of the 1 Hz trapping cycle the ions were guided into the trap and simultaneously, He buffer gas has been injected. The maximum He number density was on the order of  $10^{15} \text{ cm}^{-3}$ . During the trapping time, the ions internally relaxed and formed helium-tagged complexes (typically, we have 1 – 3 % yield of He tagged complexes for closed shell ions produced by electrospray ionization). After 300 ms the ion filling of the trap was stopped (He valve was closed and the ions were deflected by QPB). The trapped ions were then irradiated. At 990 ms, the exit electrode of the trap was opened, the ions were mass-analyzed by the  $4P_2$ , and detected by a Daly type detector operated in ion-counting mode.

For IRPD spectroscopy, we used radiation of a pulsed (10 Hz repetition rate) OPO/OPA system (LaserVision, tuning range  $700 - 4700 \text{ cm}^{-1}$ , FWHM  $\sim 1.5 \text{ cm}^{-1}$ , 10 ns pulse length). The OPO is pumped by Nd:YAG laser (Surelite EX from Continuum). The photon beam was focused into the trap by gold-coated parabolic mirrors and entered the vacuum chamber through the ZnSe-window mounted on the detector side. Energy of the photon pulses was controlled by attenuation of the pump energy delivered to the OPA stage and measured by laser energy meter Coherent Fieldmax II with J-25MB-LE sensor. The pulse energy of the light passing through the instrument and coming out from the  $\text{CaF}_2$  window on QPB chamber was monitored routinely during acquiring of the spectra.



### Computational Details

The calculations were performed using the density functional theory method B3LYP-D3 together with the SDD basis set for palladium and 6-311++G\*\* for the remaining atoms as implemented in the Gaussian 09 suite. Computation of the Hessian matrix was performed for all optimized structures at the same level of theory in order to ensure that the structures correspond to genuine minima as well as to calculate the thermochemical data and IR spectra. We used two different scaling factors. The finger print region was scaled by a factor of 0.980. The region of C-H stretching vibrations was scaled by a factor of 0.963. Note that we used a different scaling factor (0.956) for the N-H vibration in the manuscript.

We have also tested different levels of theory: PBEPBE, M06L, mPW1PW91, and MN12SX (Figure S27).

## Comparison of experimental IRPD with the calculated spectra

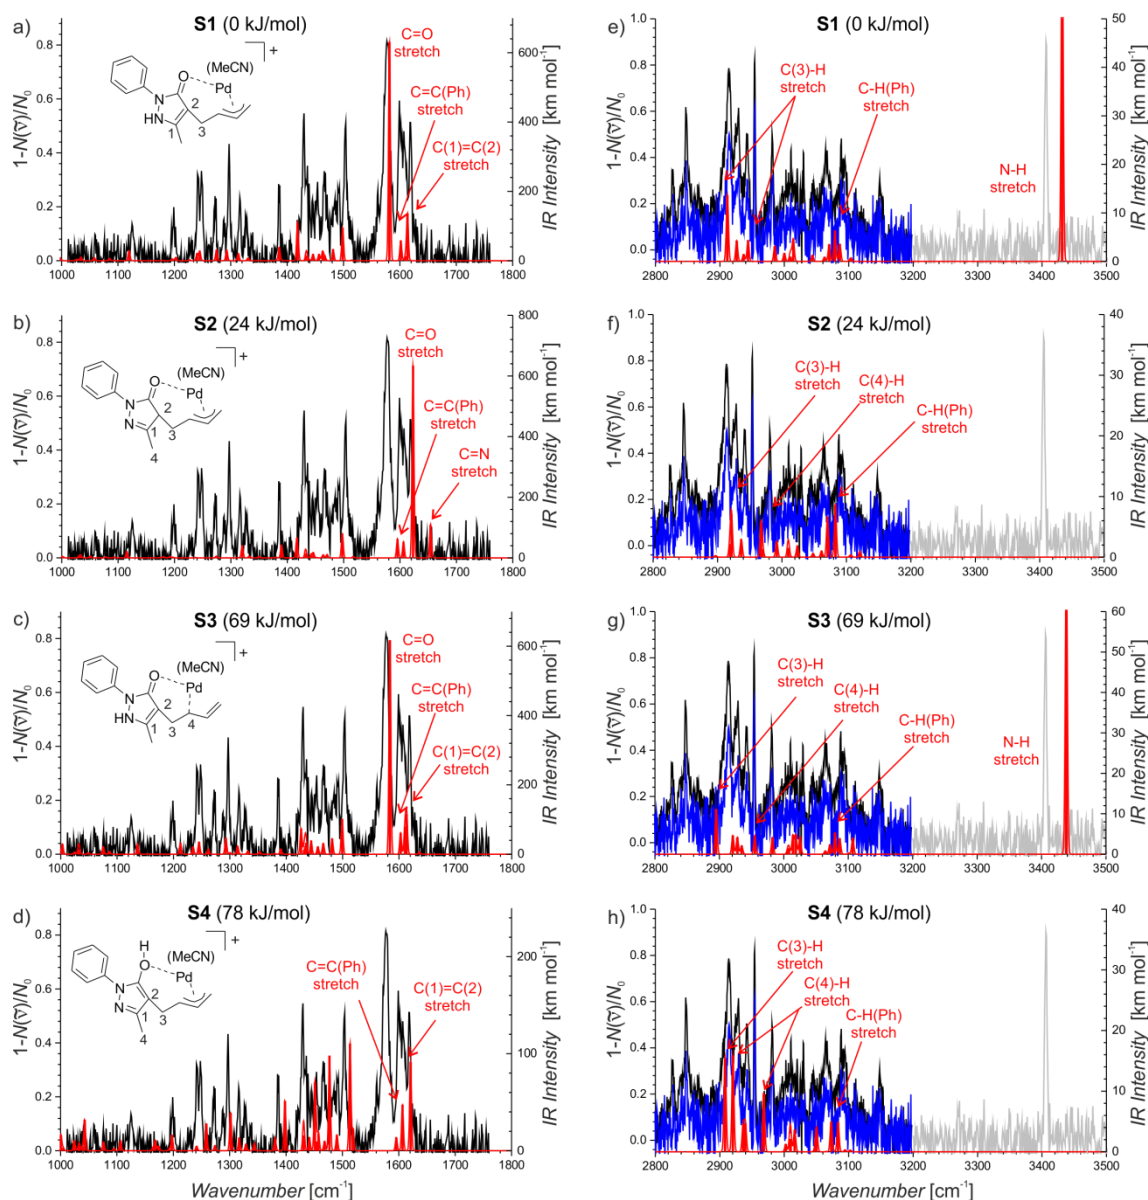

**Figure S22.** IRPD spectra of  $[^{105}\text{Pd}(\mathbf{1a})(\text{H})(\text{CH}_3\text{CN})]^+$  ( $m/z = 373$ ) are in black, blue, and grey. Theoretical IR spectra of **S1** (a,e), **S2** (b,f), **S3** (c,g), and **S4** (d,h) calculated at the B3LYP-D3/6-311++G\*\* (SDD for Pd) level of theory are in red. The finger print region was scaled by a factor of 0.980. The region of C-H stretching vibrations was scaled by a factor of 0.963. Note that we used a different scaling factor (0.956) for the N-H vibration in the manuscript.

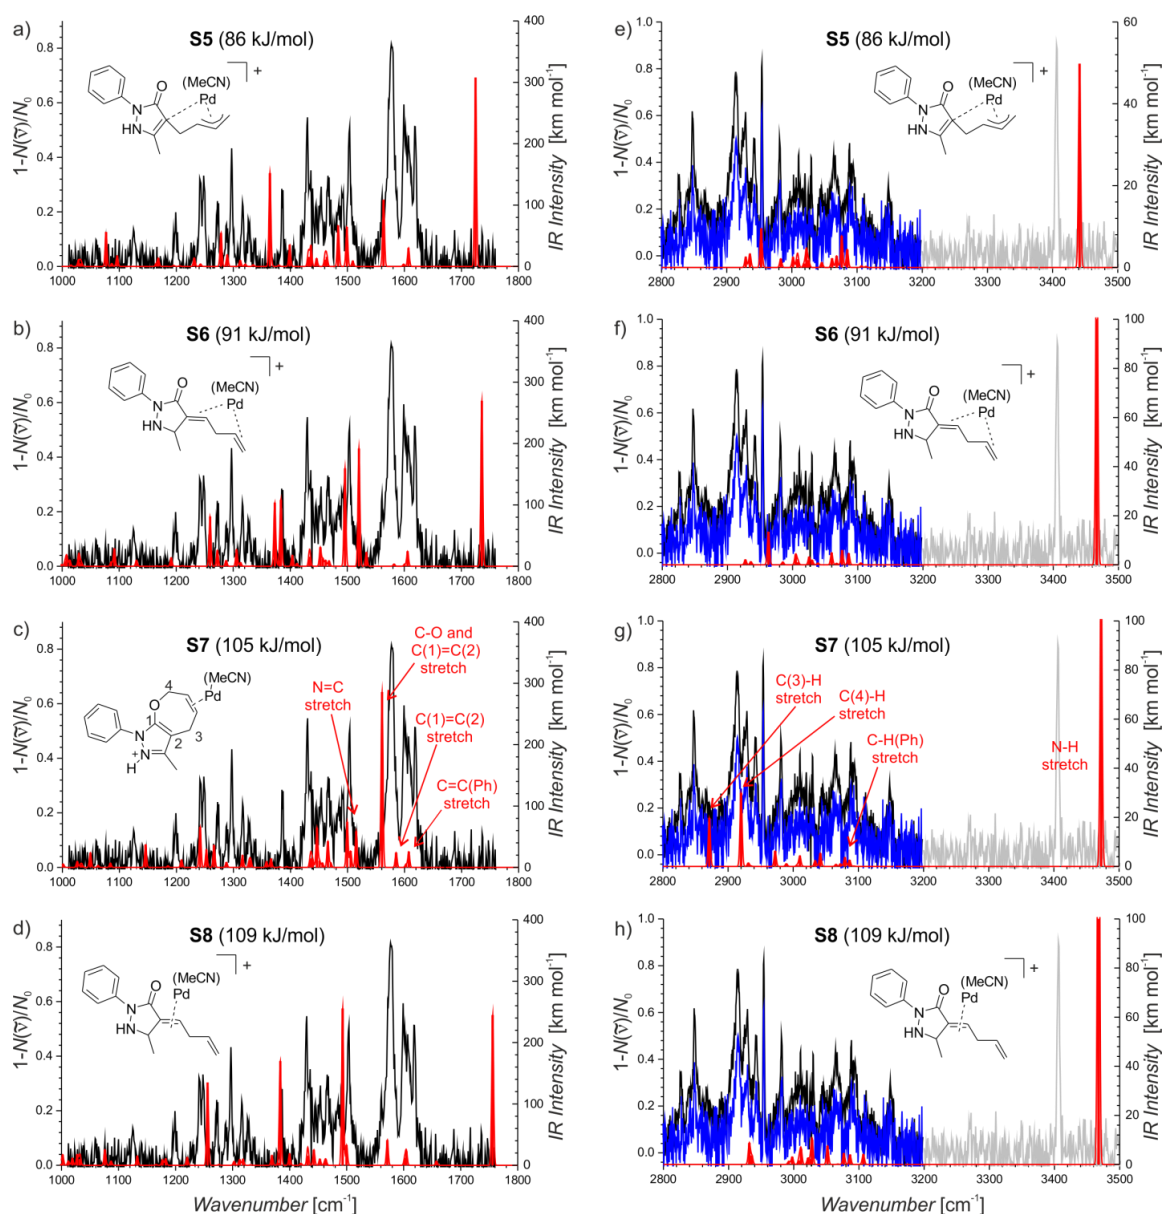

**Figure S23.** IRPD spectra of  $[^{105}\text{Pd}(\mathbf{1})(\text{H})(\text{CH}_3\text{CN})]^+$  ( $m/z = 373$ ) are in black, blue, and grey. Theoretical IR spectra of **S5** (a,e), **S6** (b,f), **S7** (c,g), and **S8** (d,h) calculated at the B3LYP-D3/6-311++G\*\* (SDD for Pd) level of theory are in red. The finger print region was scaled by a factor of 0.980. The region of C-H stretching vibrations was scaled by a factor of 0.963. Note that we used a different scaling factor (0.956) for the N-H vibration in the manuscript.

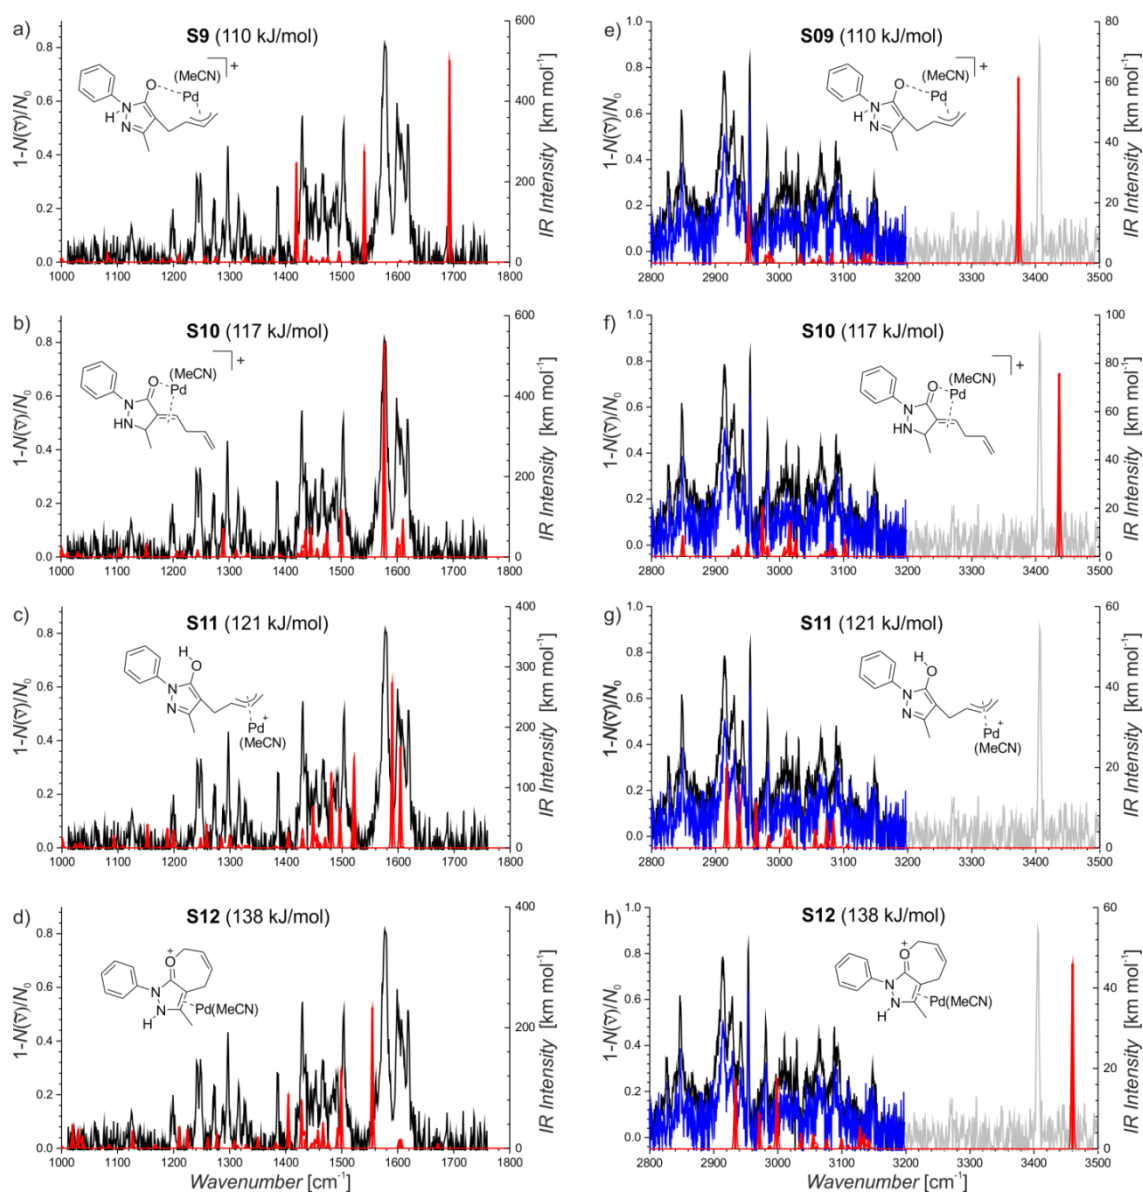

**Figure S24.** IRPD spectra of  $[^{105}\text{Pd}(\mathbf{1a})(\text{H})(\text{CH}_3\text{CN})]^+$  ( $m/z = 373$ ) are in black, blue, and grey. Theoretical IR spectra of **S9** (a,e), **S10** (b,f), **S11** (c,g), and **S12** (d,h) calculated at the B3LYP-D3/6-311++G\*\* (SDD for Pd) level of theory are in red. The finger print region was scaled by a factor of 0.980. The region of C-H stretching vibrations was scaled by a factor of 0.963. Note that we used a different scaling factor (0.956) for the N-H vibration in the manuscript.

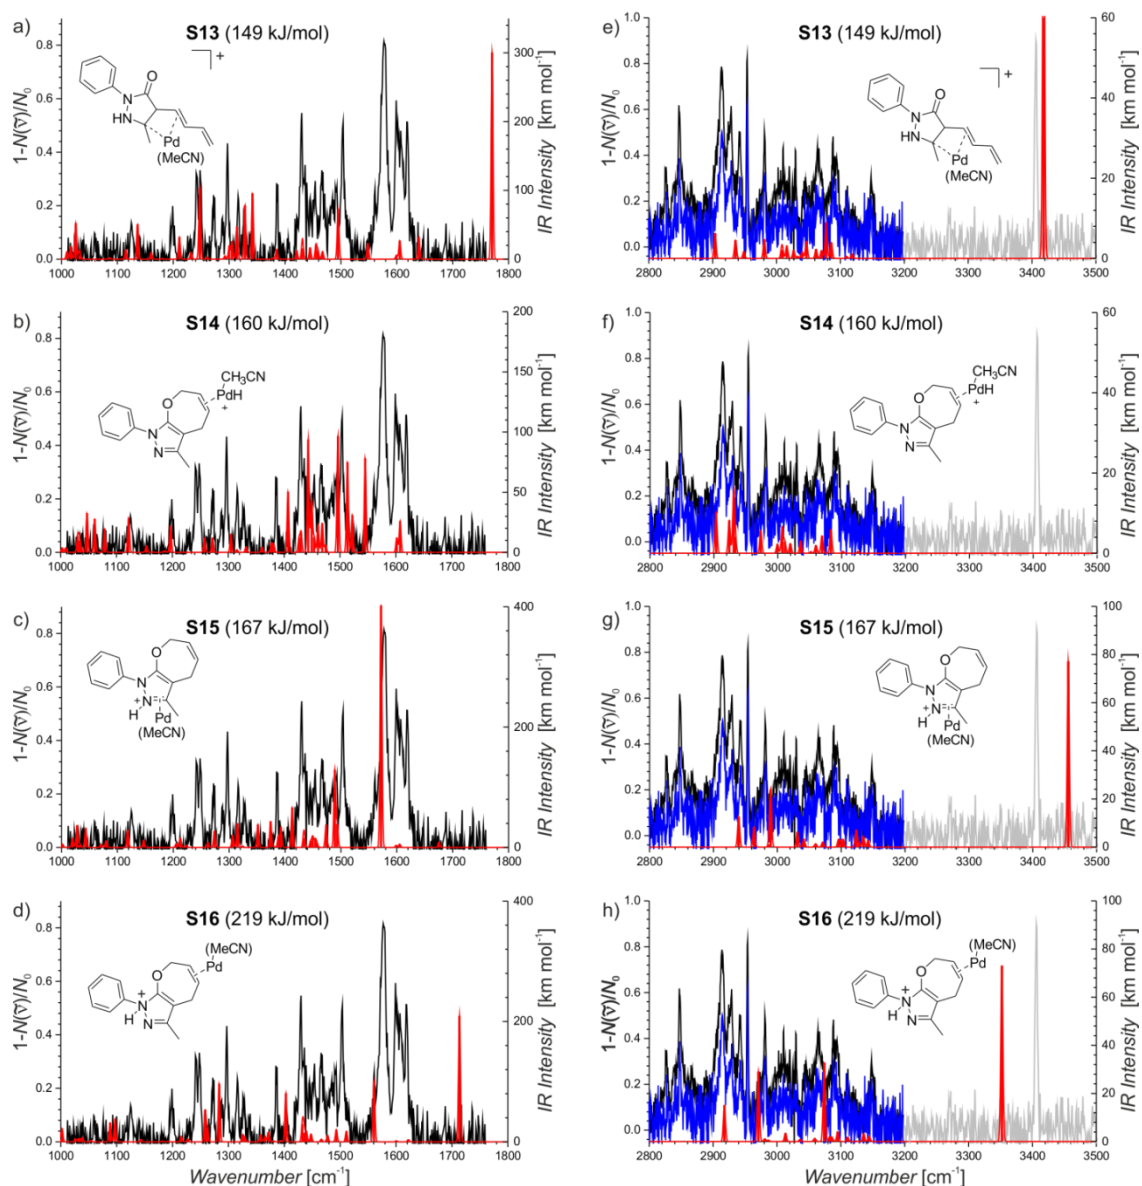

**Figure S25.** IRPD spectra of  $[^{105}\text{Pd}(\mathbf{1a})(\text{H})(\text{CH}_3\text{CN})]^+$  ( $m/z = 373$ ) are in black, blue, and grey. Theoretical IR spectra of **S13** (a,e), **S14** (b,f), **S15** (c,g), and **S16** (d,h) calculated at the B3LYP-D3/6-311++G\*\*(SDD for Pd) level of theory are in red. The finger print region was scaled by a factor of 0.980. The region of C-H stretching vibrations was scaled by a factor of 0.963. Note that we used a different scaling factor (0.956) for the N-H vibration in the manuscript.

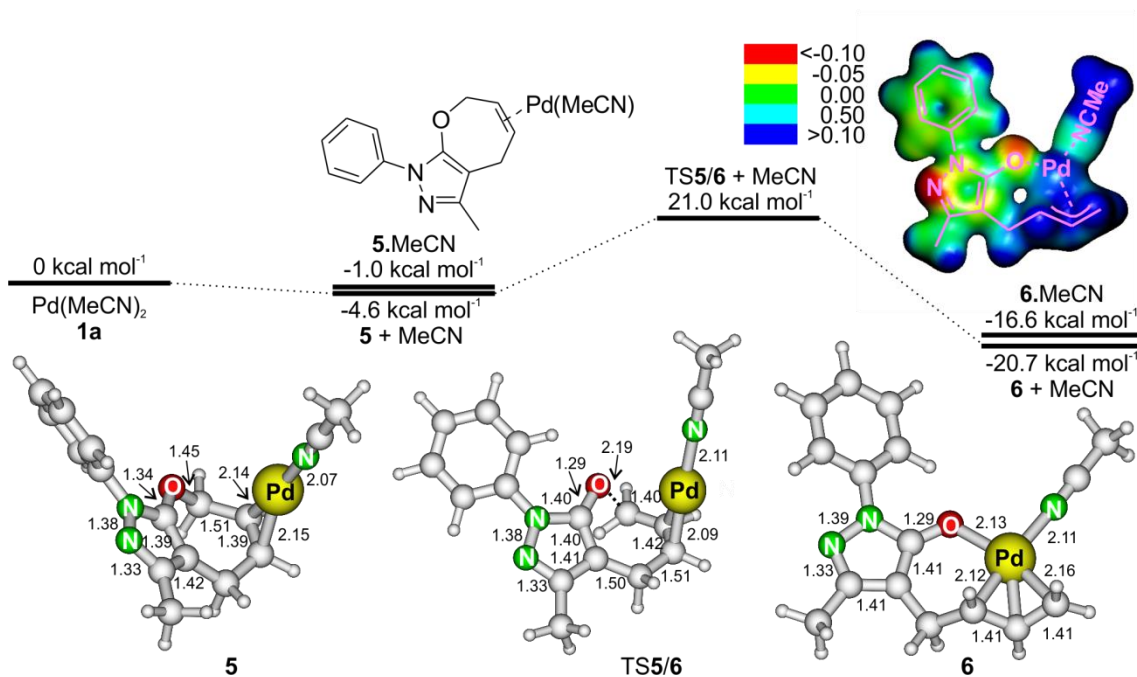

**Figure S26.** Potential energy surface for the insertion of palladium into the C-O bond (method: B3LYP-D3/6-311++G\*\*(SDD for Pd) and implicit solvation in acetonitrile with the SMD model). The ball and stick models show structures of intermediates **5** and **6**; the distances are in Å. Electrostatic potential map for **6** is color-coded on the isodensity surface  $\rho = 0.02 \text{ e } \text{\AA}^{-3}$ .



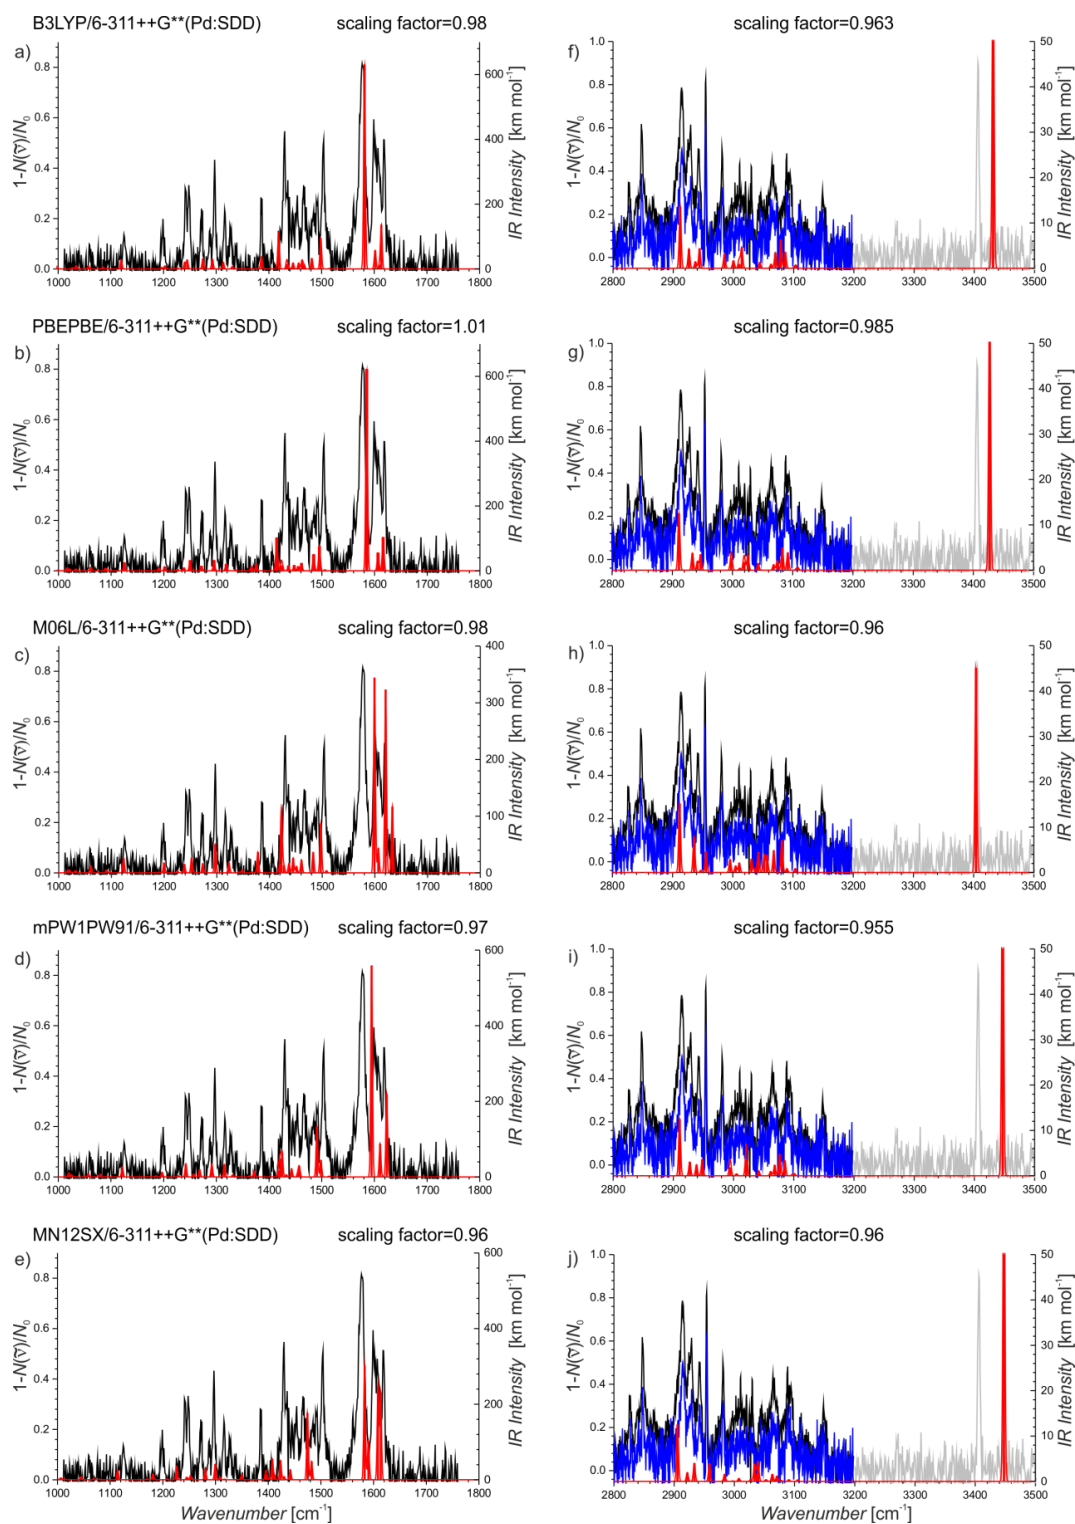

**Figure S27.** IRPD spectra of  $[^{105}\text{Pd}(\mathbf{1a})(\text{H})(\text{CH}_3\text{CN})]^+$  ( $m/z = 373$ ) are in black, blue, and grey.

Theoretical IR spectra of **S1** calculated at different levels of theory ((a,f) B3LYP-D3, (b,g) PBEPBE-D3, (c,h) M06L-D3, (d,i) mPW1PW91, (e,j) MN12SX) with basis set 6-311++G\*\*(SDD for Pd) are in red.

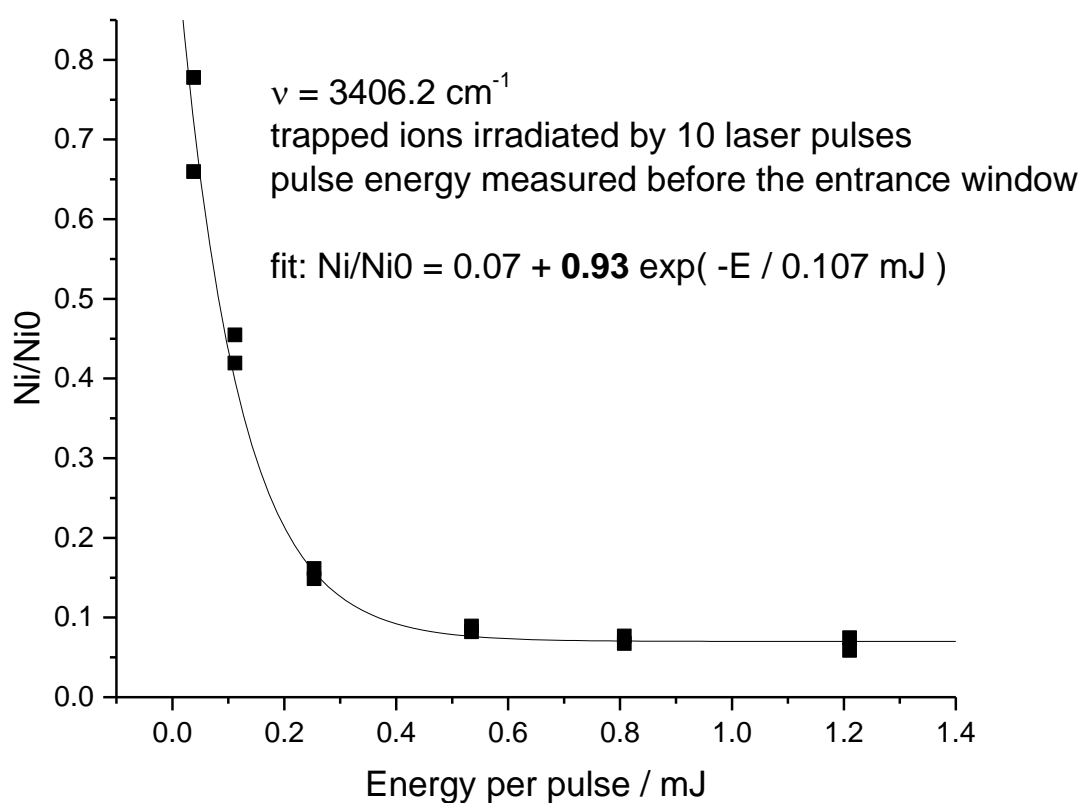

**Figure S28.** Dependence of the photofragmentation efficiency on the laser power measured at  $3406.2 \text{ cm}^{-1}$ .



**Table S5.** Geometries and energetics for calculated structures optimized at the B3LYP-D3/6-311++G\*\*:**SDD(Pd)** level of theory.

|    |                                                                                                                                                                                                                                                                                                                                                                                                                                                                                                                                                                                                                                                                                                                                                                                                                                                                                                                                                                                                                                                                                                                                                                                                                                                                                                                                                                                                                                                                                                                                                                                                                                                                                                                                                                                                                                                                                                                                                                                                                                                                                                                                                                                                                                                                                                                                                                                                                                                                                                                                                                                       |
|----|---------------------------------------------------------------------------------------------------------------------------------------------------------------------------------------------------------------------------------------------------------------------------------------------------------------------------------------------------------------------------------------------------------------------------------------------------------------------------------------------------------------------------------------------------------------------------------------------------------------------------------------------------------------------------------------------------------------------------------------------------------------------------------------------------------------------------------------------------------------------------------------------------------------------------------------------------------------------------------------------------------------------------------------------------------------------------------------------------------------------------------------------------------------------------------------------------------------------------------------------------------------------------------------------------------------------------------------------------------------------------------------------------------------------------------------------------------------------------------------------------------------------------------------------------------------------------------------------------------------------------------------------------------------------------------------------------------------------------------------------------------------------------------------------------------------------------------------------------------------------------------------------------------------------------------------------------------------------------------------------------------------------------------------------------------------------------------------------------------------------------------------------------------------------------------------------------------------------------------------------------------------------------------------------------------------------------------------------------------------------------------------------------------------------------------------------------------------------------------------------------------------------------------------------------------------------------------------|
| S1 | <p>NH_1_4b.log</p> <p>Low frequencies --- -14.1088 -10.1257 -9.8898 -0.0008 -0.0005 0.0003<br/> Low frequencies --- 19.9905 20.4721 26.2084</p> <p>Zero-point correction= 0.310976 (Hartree/Particle)<br/> Thermal correction to Energy= 0.332707<br/> Thermal correction to Enthalpy= 0.333651<br/> Thermal correction to Gibbs Free Energy= 0.256217<br/> Sum of electronic and zero-point Energies= -987.759647<br/> Sum of electronic and thermal Energies= -987.737915<br/> Sum of electronic and thermal Enthalpies= -987.736971<br/> Sum of electronic and thermal Free Energies= -987.814405</p> <p>N,0,0.000493331,0.0095527103,-0.002152097<br/> N,0,-0.0018820893,0.012315993,1.3854927478<br/> C,0,1.3039237981,0.0050703183,1.8121882693<br/> C,0,1.2926774092,0.1628670681,-0.4463735403<br/> C,0,2.1328026387,0.1438789397,0.7286784466<br/> H,0,4.0609993174,-0.7435981333,0.440202168<br/> C,0,3.6341432742,0.2279941104,0.7109953417<br/> C,0,4.1475681089,1.2812089439,-0.2411506584<br/> H,0,5.8005280954,0.1317711538,-1.0557845937<br/> C,0,5.2765804999,1.0828914557,-1.0700559327<br/> C,0,5.4519135178,1.9726726332,-2.1503757178<br/> C,0,-1.2121681335,0.1837490493,-0.726323229<br/> C,0,-2.2453362379,0.9433039762,-0.1765212804<br/> C,0,-3.4353438604,1.0837838788,-0.8849585422<br/> C,0,-3.5839691879,0.4867995778,-2.1346084862<br/> C,0,-2.5389014359,-0.2603493482,-2.675907134<br/> C,0,-1.3498072594,-0.4251114367,-1.9734665793<br/> C,0,1.6096841745,-0.1636696831,3.2604331308<br/> O,0,1.5640084466,0.320521568,-1.666239712<br/> Pd,0,3.4850380868,1.0946679141,-2.2415606449<br/> N,0,2.989627422,1.1448929043,-4.2825539388<br/> C,0,2.6718359659,1.1771960021,-5.3855538274<br/> H,0,1.671449461,-1.2239382584,3.5245884497<br/> H,0,2.5671507939,0.2946571565,3.508236606<br/> H,0,0.8391883211,0.2990270577,3.879840656<br/> H,0,-0.5364273845,-1.008694937,-2.3805814234<br/> H,0,-2.6542417166,-0.731547781,-3.644438096<br/> H,0,-4.5104168224,0.6017332155,-2.6834767937<br/> H,0,-4.2414106821,1.6704845997,-0.4618957522<br/> H,0,-2.1137314541,1.4289320392,0.7820337765<br/> H,0,-0.7069462619,-0.5737409041,1.8183849068<br/> H,0,3.9898790895,0.453973986,1.7219724315<br/> H,0,3.8411291858,2.3040187598,-0.0252303071<br/> H,0,6.1691723195,1.7327036654,-2.925494608<br/> H,0,5.2082316504,3.0251634698,-2.040685578<br/> C,0,2.2705961691,1.21684926,-6.7786375648<br/> H,0,2.9829378113,1.811199327,-7.3541478427<br/> H,0,2.2411912687,0.2034077732,-7.1838117125<br/> H,0,1.2788005286,1.665133884,-6.8646474285</p> |
| S2 | <p>CH_1.log</p> <p>Low frequencies --- -17.2177 -13.7374 -10.5445 -8.9099 -0.0006 -0.0004<br/> Low frequencies --- 0.0006 17.1408 20.1232</p> <p>Zero-point correction= 0.310400 (Hartree/Particle)<br/> Thermal correction to Energy= 0.330946<br/> Thermal correction to Enthalpy= 0.331890<br/> Thermal correction to Gibbs Free Energy= 0.258226<br/> Sum of electronic and zero-point Energies= -987.750547<br/> Sum of electronic and thermal Energies= -987.730001<br/> Sum of electronic and thermal Enthalpies= -987.729057<br/> Sum of electronic and thermal Free Energies= -987.802721</p> <p>C,0,0.0676816862,-0.5050810131,0.0900901208<br/> C,0,0.0238233179,-0.0897983877,1.4232315701<br/> C,0,1.1461865793,0.4720120308,2.0349555454<br/> C,0,2.3204623906,0.6129711722,1.304074491<br/> C,0,2.3801773938,0.2000579642,-0.025097889<br/> C,0,1.2527521078,-0.3556373049,-0.6243616048<br/> N,0,-1.1751850041,-0.2188798816,2.1878289223<br/> N,0,-1.3249218394,0.589566987,3.3382420328<br/> C,0,-2.4562380393,0.3174846734,3.8761779823</p>                                                                                                                                                                                                                                                                                                                                                                                                                                                                                                                                                                                                                                                                                                                                                                                                                                                                                                                                                                                                                                                                                                                                                                                                                                                                                                                                                                                                                                                                                                                        |

|    |                                                                                                                                                                                                                                                                                                                                                                                                                                                                                                                                                                                                                                                                                                                                                                                                                                                                                                                                                                                                                                                                                                                                                                                                                                                                                                                                                                                                                                                                                                                                                                                                                                                                                                                                                                                                                                                                                                                                                                                                                                                                                                                                                                                                                                                                                                                                                                                                                                                                                                           |
|----|-----------------------------------------------------------------------------------------------------------------------------------------------------------------------------------------------------------------------------------------------------------------------------------------------------------------------------------------------------------------------------------------------------------------------------------------------------------------------------------------------------------------------------------------------------------------------------------------------------------------------------------------------------------------------------------------------------------------------------------------------------------------------------------------------------------------------------------------------------------------------------------------------------------------------------------------------------------------------------------------------------------------------------------------------------------------------------------------------------------------------------------------------------------------------------------------------------------------------------------------------------------------------------------------------------------------------------------------------------------------------------------------------------------------------------------------------------------------------------------------------------------------------------------------------------------------------------------------------------------------------------------------------------------------------------------------------------------------------------------------------------------------------------------------------------------------------------------------------------------------------------------------------------------------------------------------------------------------------------------------------------------------------------------------------------------------------------------------------------------------------------------------------------------------------------------------------------------------------------------------------------------------------------------------------------------------------------------------------------------------------------------------------------------------------------------------------------------------------------------------------------------|
|    | <p> C,O,-3.1902436134,-0.7739862167,3.141396228<br/> C,O,-2.2378819804,-1.022747953,1.9815203918<br/> C,O,-2.9367356091,1.0075201482,5.102864867<br/> O,O,-2.3812700428,-1.81055547,1.0274659263<br/> Pd,O,-4.3291439358,-2.6155144933,0.5105856277<br/> N,O,-3.5707951158,-3.7546736176,-1.0811135388<br/> C,O,-3.1092069228,-4.387244275,-1.9211950039<br/> C,O,-2.5258929768,-5.185149075,-2.9819279522<br/> C,O,-4.6483774523,-0.4819877892,2.7342785688<br/> C,O,-5.3088052368,-1.7073266414,2.1626816038<br/> C,O,-6.1847988881,-1.6998948451,1.0551160188<br/> C,O,-6.4502445151,-2.9493594567,0.4493658093<br/> H,O,-4.6806002091,0.3503675476,2.0271081166<br/> H,O,-6.4024578698,-0.7743933186,0.5309183329<br/> H,O,-3.8589107064,1.5614844596,4.9013938217<br/> H,O,-3.1562076413,0.2844508727,5.8942271749<br/> H,O,-2.1805351069,1.7061989961,5.4582582954<br/> H,O,-0.8031968518,-0.9377794681,-0.3766497413<br/> H,O,1.2895446496,-0.6722364237,-1.6597567604<br/> H,O,3.2972168715,0.3136996616,-0.5898446509<br/> H,O,3.190951321,1.0488103323,1.7786983201<br/> H,O,1.0893755605,0.8004978491,3.0623615705<br/> H,O,-5.1929497624,-0.1685230761,3.6315452535<br/> H,O,-5.3614903846,-2.5617693219,2.8376321719<br/> H,O,-6.9347951378,-2.9791177662,-0.5187289925<br/> H,O,-6.5588674301,-3.8408695789,1.0597532307<br/> H,O,-3.1752111546,-1.6785773871,3.765880544<br/> H,O,-3.0411685807,-6.1453636337,-3.049506591<br/> H,O,-2.6216220009,-4.6600700259,-3.9344918387<br/> H,O,-1.4684418304,-5.3597304539,-2.7736038675 </p>                                                                                                                                                                                                                                                                                                                                                                                                                                                                                                                                                                                                                                                                                                                                                                                                                                                                                                                                                      |
| S3 | <p>NH_II_3.log</p> <p> Low frequencies --- -17.5727 -10.8828 -9.6340 -0.0002 0.0006 0.0009<br/> Low frequencies --- 12.1156 21.1026 23.5587 </p> <p> Zero-point correction= 0.310268 (Hartree/Particle)<br/> Thermal correction to Energy= 0.332500<br/> Thermal correction to Enthalpy= 0.333445<br/> Thermal correction to Gibbs Free Energy= 0.253956<br/> Sum of electronic and zero-point Energies= -987.733289<br/> Sum of electronic and thermal Energies= -987.711057<br/> Sum of electronic and thermal Enthalpies= -987.710113<br/> Sum of electronic and thermal Free Energies= -987.789602 </p> <p> C,O,0.3926606672,-0.6834935465,0.3333009766<br/> C,O,0.2367027415,0.049307055,1.509235611<br/> C,O,1.3175700777,0.6962208204,2.108456922<br/> C,O,2.5710680377,0.615112686,1.5086914122<br/> C,O,2.7437295418,-0.1190085967,0.337583809<br/> C,O,1.6560215941,-0.7702829589,-0.2418646756<br/> N,O,-1.0563314391,0.1444044672,2.0988274781<br/> N,O,-1.4348022429,1.2726276675,2.8124275692<br/> C,O,-2.6740250588,1.0393990834,3.3597991976<br/> C,O,-3.0261555953,-0.2651622139,3.119237229<br/> C,O,-1.9846868013,-0.8336047656,2.3176592841<br/> C,O,-3.3785883071,2.1177598004,4.1062263074<br/> O,O,-1.8608085316,-2.013806464,1.8759488275<br/> C,O,-4.2130553163,-1.0430828627,3.590002571<br/> C,O,-4.6794851228,-2.1151182906,2.6063042772<br/> C,O,-5.9359558366,-2.7745694949,2.9847485847<br/> C,O,-6.9166501778,-3.0494679676,2.1187881694<br/> H,O,-5.0561230436,-0.3546729111,3.7334151548<br/> H,O,-6.0637377622,-3.0126046449,4.0380759832<br/> H,O,-3.1994400631,3.0978364334,3.6582682716<br/> H,O,-4.4531983169,1.9363285535,4.1144872559<br/> H,O,-3.0336212739,2.1564704348,5.1435207343<br/> H,O,-0.4574200178,-1.1799181604,-0.1128482103<br/> H,O,1.7869636218,-1.3408227821,-1.1530345732<br/> H,O,3.7225366337,-0.1851557875,-0.120883389<br/> H,O,3.4147094046,1.1155371286,1.9676784332<br/> H,O,1.1841493967,1.2370559213,3.0368587301<br/> H,O,-1.1920759673,2.1575327405,2.3822238829<br/> H,O,-4.0279035154,-1.4949585513,4.571329351<br/> H,O,-7.8479955159,-3.4999120374,2.4405583875<br/> H,O,-6.8191673003,-2.8223376715,1.0622432516<br/> Pd,O,-3.147077917,-3.5021702932,2.4363700742<br/> H,O,-4.7014351166,-1.751017433,1.5759781755<br/> N,O,-4.171230129,-5.1710174439,2.9335465243<br/> C,O,-4.6969352234,-6.1625778963,3.1801626853<br/> C,O,-5.3763506752,-7.4053049345,3.4867655403<br/> H,O,-5.079510667,-8.1755371269,2.7718586651 </p> |

|    |                                                                                                                                                                                                                                                                                                                                                                                                                                                                                                                                                                                                                                                                                                                                                                                                                                                                                                                                                                                                                                                                                                                                                                                                                                                                                                                                                                                                                                                                                                                                                                                                                                                                                                                                                                                                                                                                                                                                                                                                                                                                                                                                                                                                                                                                                                                                                                                                                                                                                                                                                                                                         |
|----|---------------------------------------------------------------------------------------------------------------------------------------------------------------------------------------------------------------------------------------------------------------------------------------------------------------------------------------------------------------------------------------------------------------------------------------------------------------------------------------------------------------------------------------------------------------------------------------------------------------------------------------------------------------------------------------------------------------------------------------------------------------------------------------------------------------------------------------------------------------------------------------------------------------------------------------------------------------------------------------------------------------------------------------------------------------------------------------------------------------------------------------------------------------------------------------------------------------------------------------------------------------------------------------------------------------------------------------------------------------------------------------------------------------------------------------------------------------------------------------------------------------------------------------------------------------------------------------------------------------------------------------------------------------------------------------------------------------------------------------------------------------------------------------------------------------------------------------------------------------------------------------------------------------------------------------------------------------------------------------------------------------------------------------------------------------------------------------------------------------------------------------------------------------------------------------------------------------------------------------------------------------------------------------------------------------------------------------------------------------------------------------------------------------------------------------------------------------------------------------------------------------------------------------------------------------------------------------------------------|
|    | H,0,-5.1164659686,-7.734307462,4.4949378542<br>H,0,-6.4568831362,-7.2588972028,3.4242256791<br>OH_II_1b.log<br><br>Low frequencies --- -15.9934 -10.9540 -10.7181 -0.0003 -0.0001 0.0004<br>Low frequencies --- 8.6443 15.4251 27.0770<br><br>Zero-point correction= 0.310073 (Hartree/Particle)<br>Thermal correction to Energy= 0.332038<br>Thermal correction to Enthalpy= 0.332983<br>Thermal correction to Gibbs Free Energy= 0.254242<br>Sum of electronic and zero-point Energies= -987.729777<br>Sum of electronic and thermal Energies= -987.707812<br>Sum of electronic and thermal Enthalpies= -987.706868<br>Sum of electronic and thermal Free Energies= -987.785608<br><br>C,0,0.0003795304,-0.0011343324,-0.0009165337<br>N,0,-0.000273152,-0.002081015,1.3562183289<br>N,0,1.2809898746,-0.0008824474,1.8375370579<br>C,0,2.062264063,-0.0251893114,0.7662160557<br>C,0,1.3026705698,-0.0234028084,-0.443990961<br>C,0,-1.1275315953,0.127048635,2.2089122467<br>C,0,-2.2471273586,-0.6834241042,1.9990242178<br>C,0,-3.3740239576,-0.5153526417,2.8043433124<br>C,0,-3.3672141131,0.4295875766,3.8258452876<br>C,0,-2.2297452864,1.2079174605,4.0475505131<br>C,0,-1.1089479672,1.0689108132,3.2370310247<br>C,0,3.5483668513,-0.0634223585,0.9063124077<br>C,0,1.8030930586,-0.0653647191,-1.8610052553<br>C,0,1.1222374405,0.941148469,-2.7503309414<br>C,0,0.7175146839,0.6693993237,-4.0698407922<br>C,0,-0.1974385504,1.5712744011,-4.6643524004<br>Pd,0,-1.0386792724,0.8659972612,-2.8406234243<br>N,0,-3.1104001908,1.096906026,-3.1087656308<br>C,0,-4.2320980378,1.2497881165,-3.3071700199<br>C,0,-5.6460113371,1.442539311,-3.5631618392<br>O,0,-1.160277419,0.0678568394,-0.7341542366<br>H,0,1.7007938798,-1.0681727172,-2.2894543596<br>H,0,0.868458271,-0.3191445334,-4.4927134093<br>H,0,3.9635836186,-0.9854146185,0.4895558401<br>H,0,4.019590316,0.7779402672,0.3899371688<br>H,0,3.8168399329,-0.0129677432,1.961174156<br>H,0,-2.2117931314,-1.4840639744,1.2680821504<br>H,0,-4.2394348328,-1.1490031328,2.6529882356<br>H,0,-4.2367430365,0.5483272671,4.4603531281<br>H,0,-2.2181565236,1.9316894749,4.8533189328<br>H,0,-0.2195953577,1.6648112229,3.3928216801<br>H,0,2.8757896639,0.1600836765,-1.8533533813<br>H,0,1.214158062,1.9820481808,-2.4422576577<br>H,0,-0.6963387849,1.2943038156,-5.5852762894<br>H,0,-0.1131159127,2.6377868536,-4.4760162441<br>H,0,-6.1037308819,1.9811629477,-2.7309116797<br>H,0,-5.7789595815,2.0213107058,-4.4795528494<br>H,0,-6.1367714728,0.4737962643,-3.6773392171<br>H,0,-1.9250344971,0.1837756253,-0.1452017438 |
| S4 |                                                                                                                                                                                                                                                                                                                                                                                                                                                                                                                                                                                                                                                                                                                                                                                                                                                                                                                                                                                                                                                                                                                                                                                                                                                                                                                                                                                                                                                                                                                                                                                                                                                                                                                                                                                                                                                                                                                                                                                                                                                                                                                                                                                                                                                                                                                                                                                                                                                                                                                                                                                                         |
|    | NH_I_1.log<br><br>Low frequencies --- -13.3958 -11.5181 -8.2834 -0.0005 0.0002 0.0007<br>Low frequencies --- 10.5576 25.3881 29.7789<br><br>Zero-point correction= 0.309726 (Hartree/Particle)<br>Thermal correction to Energy= 0.332040<br>Thermal correction to Enthalpy= 0.332984<br>Thermal correction to Gibbs Free Energy= 0.253919<br>Sum of electronic and zero-point Energies= -987.726711<br>Sum of electronic and thermal Energies= -987.704397<br>Sum of electronic and thermal Enthalpies= -987.703453<br>Sum of electronic and thermal Free Energies= -987.782518<br><br>C,0,0.004024121,0.0567864155,-0.0122823566<br>C,0,0.0137114864,0.006192799,1.3833981005<br>C,0,1.2185360931,-0.0199499791,2.0900679311<br>C,0,2.4158916923,0.0061467663,1.3832555247<br>C,0,2.4202017208,0.0380105915,-0.0105040466<br>C,0,1.212882563,0.0620171535,-0.7033621398<br>N,0,-1.2061559282,-0.0371658148,2.1063182825<br>C,0,-1.5334576248,0.6141590884,3.3085448224<br>C,0,-2.9923311925,0.4368230443,3.4369040271<br>C,0,-3.438563341,-0.2308094438,2.3070511349<br>N,0,-2.3808025297,-0.4289469416,1.4706866375<br>O,0,-0.7617348871,1.195024293,4.047960942                                                                                                                                                                                                                                                                                                                                                                                                                                                                                                                                                                                                                                                                                                                                                                                                                                                                                                                                                                                                                                                                                                                                                                                                                                                                                                                                                                                                                                      |
| S5 |                                                                                                                                                                                                                                                                                                                                                                                                                                                                                                                                                                                                                                                                                                                                                                                                                                                                                                                                                                                                                                                                                                                                                                                                                                                                                                                                                                                                                                                                                                                                                                                                                                                                                                                                                                                                                                                                                                                                                                                                                                                                                                                                                                                                                                                                                                                                                                                                                                                                                                                                                                                                         |

|    |                                                                                                                                                                                                                                                                                                                                                                                                                                                                                                                                                                                                                                                                                                                                                                                                                                                                                                                                                                                                                                                                                                                                                                                                                                                                                                                                                                                                                                                                                                                                                                                                                                                                                                                                                                                                                                                                                                                                                                                                                                                                                                                                                                                                                                                                                                                                                                                                                                                                    |
|----|--------------------------------------------------------------------------------------------------------------------------------------------------------------------------------------------------------------------------------------------------------------------------------------------------------------------------------------------------------------------------------------------------------------------------------------------------------------------------------------------------------------------------------------------------------------------------------------------------------------------------------------------------------------------------------------------------------------------------------------------------------------------------------------------------------------------------------------------------------------------------------------------------------------------------------------------------------------------------------------------------------------------------------------------------------------------------------------------------------------------------------------------------------------------------------------------------------------------------------------------------------------------------------------------------------------------------------------------------------------------------------------------------------------------------------------------------------------------------------------------------------------------------------------------------------------------------------------------------------------------------------------------------------------------------------------------------------------------------------------------------------------------------------------------------------------------------------------------------------------------------------------------------------------------------------------------------------------------------------------------------------------------------------------------------------------------------------------------------------------------------------------------------------------------------------------------------------------------------------------------------------------------------------------------------------------------------------------------------------------------------------------------------------------------------------------------------------------------|
|    | C,O,-4.8125317666,-0.6252613954,1.8863252233<br>Pd,O,-2.949668469,-1.5934116203,4.838230805<br>N,O,-2.1636496766,-3.3640025887,4.0446725747<br>C,O,-1.6176106541,-4.3107416724,3.6874782194<br>C,O,-0.9262083449,-5.5071537204,3.2483882182<br>C,O,-3.7721393449,1.1179599575,4.5458869137<br>C,O,-3.436389977,0.2573455325,5.7417958312<br>C,O,-4.2872217944,-0.7321271927,6.2880272811<br>C,O,-3.6723080032,-1.8261461662,6.9259542221<br>H,O,-4.258249508,-2.6966016902,7.1937736248<br>H,O,-5.3326850319,-0.7827465206,5.9998184628<br>H,O,-2.4978817176,0.4859719794,6.242184447<br>H,O,-3.4319025072,2.1469077708,4.6731379481<br>H,O,-4.8420193576,1.1222697891,4.3324463699<br>H,O,-2.7342807834,-1.696759675,7.4562358684<br>H,O,-4.8154404164,-1.6043922274,1.4017194163<br>H,O,-5.4820758117,-0.6681659094,2.7440079366<br>H,O,-5.2125395876,0.1022448268,1.1742312902<br>H,O,1.2098425696,-0.0338001042,3.1701784059<br>H,O,3.3518541915,-0.0009340241,1.9284625641<br>H,O,3.3579285174,0.0535907625,-0.5517353135<br>H,O,1.2061327624,0.1042812787,-1.7856660483<br>H,O,-0.9308258665,0.1243999229,-0.5544508277<br>H,O,-1.6067406833,-6.1417359828,2.6770396335<br>H,O,-0.0755297766,-5.2346799731,2.6202680109<br>H,O,-0.5653232907,-6.062621027,4.1166264398<br>H,O,-2.3090643459,-1.2441408571,0.8742176155                                                                                                                                                                                                                                                                                                                                                                                                                                                                                                                                                                                                                                                                                                                                                                                                                                                                                                                                                                                                                                                                                                                                       |
| S6 | NH_V_1b.log<br><br>Low frequencies --- -16.7140 -12.9380 -10.9001 -0.0003 0.0004 0.0008<br>Low frequencies --- 9.4622 12.9075 17.2238<br><br>Zero-point correction= 0.309489 (Hartree/Particle)<br>Thermal correction to Energy= 0.332103<br>Thermal correction to Enthalpy= 0.333048<br>Thermal correction to Gibbs Free Energy= 0.251728<br>Sum of electronic and zero-point Energies= -987.725063<br>Sum of electronic and thermal Energies= -987.702448<br>Sum of electronic and thermal Enthalpies= -987.701504<br>Sum of electronic and thermal Free Energies= -987.782824<br><br>C,O,-1.3811204065,0.2322540313,3.3593745914<br>C,O,-1.1811056813,-0.3331416522,2.0996093716<br>C,O,-2.1147000278,-1.2126666306,1.5484713274<br>C,O,-3.271959962,-1.5108680987,2.2626500311<br>C,O,-3.4817181485,-0.9564853731,3.5227166168<br>C,O,-2.5315152236,-0.095159969,4.0688845347<br>N,O,-0.004376855,0.0032703374,1.3769384821<br>N,O,0.0027103868,-0.0339793775,-0.0104314055<br>C,O,1.2389386507,0.1520107002,-0.496798967<br>C,O,2.1333489589,0.1942201811,0.6013657752<br>C,O,1.3153914363,0.079045257,1.84128911<br>O,O,1.6567196104,0.0430869345,3.0048452728<br>C,O,3.542788862,0.3460396082,0.5236280485<br>C,O,4.494852733,0.346296362,1.6994563977<br>C,O,5.0252155685,1.764896064,1.5757192865<br>C,O,4.4730206574,2.8254231196,2.2180069248<br>Pd,O,2.8391912469,2.334135468,0.4397796652<br>N,O,1.8772236205,4.2003664177,0.288693808<br>C,O,1.4185030821,5.2532460353,0.2258530466<br>C,O,0.842420447,6.5826492429,0.1497394562<br>C,O,1.495274313,0.1355774349,-1.9647504222<br>H,O,4.0059768977,0.1635586243,-0.4438944058<br>H,O,5.8390116853,1.9320473805,0.8751040768<br>H,O,0.7366048448,0.7068405048,-2.5037416299<br>H,O,2.4685818261,0.564486167,-2.1945610068<br>H,O,1.4732623745,-0.8931399554,-2.3372884311<br>H,O,-0.6389752348,0.8974334746,3.7765275646<br>H,O,-2.6877328142,0.3321540308,5.0517177789<br>H,O,-4.3779164224,-1.1998299043,4.0795888025<br>H,O,-3.9989255428,-2.192614337,1.8388532677<br>H,O,-1.9314729034,-1.6849516809,0.5907623614<br>H,O,-0.8607771393,0.1834594432,-0.49016171<br>H,O,4.8802545044,3.8212917473,2.0898049838<br>H,O,3.7380711791,2.6824744508,3.0040920541<br>H,O,3.9682499667,0.197725404,2.6399328819<br>H,O,5.280904718,-0.4025705552,1.5957794678<br>H,O,0.5790207787,6.8153350552,-0.8840099995<br>H,O,-0.0567191182,6.6337889256,0.767136893<br>H,O,1.5628381309,7.320833132,0.5080390983 |
| S7 | NH_R_3.log                                                                                                                                                                                                                                                                                                                                                                                                                                                                                                                                                                                                                                                                                                                                                                                                                                                                                                                                                                                                                                                                                                                                                                                                                                                                                                                                                                                                                                                                                                                                                                                                                                                                                                                                                                                                                                                                                                                                                                                                                                                                                                                                                                                                                                                                                                                                                                                                                                                         |

|    |                                                                                                                                                                                                                                                                                                                                                                                                                                                                                                                                                                                                                                                                                                                                                                                                                                                                                                                                                                                                                                                                                                                                                                                                                                                                                                                                                                                                                                                                                                                                                                                                                                                                                                                                                                                                                                                                                                                                                                                                                                                                                                                                                                                                                                                                                                                                                                                                                                                                                                                                                                                                                                                                    |
|----|--------------------------------------------------------------------------------------------------------------------------------------------------------------------------------------------------------------------------------------------------------------------------------------------------------------------------------------------------------------------------------------------------------------------------------------------------------------------------------------------------------------------------------------------------------------------------------------------------------------------------------------------------------------------------------------------------------------------------------------------------------------------------------------------------------------------------------------------------------------------------------------------------------------------------------------------------------------------------------------------------------------------------------------------------------------------------------------------------------------------------------------------------------------------------------------------------------------------------------------------------------------------------------------------------------------------------------------------------------------------------------------------------------------------------------------------------------------------------------------------------------------------------------------------------------------------------------------------------------------------------------------------------------------------------------------------------------------------------------------------------------------------------------------------------------------------------------------------------------------------------------------------------------------------------------------------------------------------------------------------------------------------------------------------------------------------------------------------------------------------------------------------------------------------------------------------------------------------------------------------------------------------------------------------------------------------------------------------------------------------------------------------------------------------------------------------------------------------------------------------------------------------------------------------------------------------------------------------------------------------------------------------------------------------|
| S8 | <p>Low frequencies --- -14.4102 -10.4852 -5.9714 0.0001 0.0005 0.0007</p> <p>Low frequencies --- 9.8769 19.4113 20.6161</p> <p>Zero-point correction= 0.312520 (Hartree/Particle)</p> <p>Thermal correction to Energy= 0.334340</p> <p>Thermal correction to Enthalpy= 0.335284</p> <p>Thermal correction to Gibbs Free Energy= 0.255499</p> <p>Sum of electronic and zero-point Energies= -987.719532</p> <p>Sum of electronic and thermal Energies= -987.697712</p> <p>Sum of electronic and thermal Enthalpies= -987.696768</p> <p>Sum of electronic and thermal Free Energies= -987.776553</p> <p>C,0,-0.029091034,-0.3391544733,0.1269482144</p> <p>C,0,0.0232386849,-0.3563960911,1.6409177051</p> <p>C,0,1.2096653562,-0.1573175254,2.3521655312</p> <p>Pd,0,-0.0098323892,1.5643793009,2.5679502811</p> <p>N,0,-1.0350294446,3.3147340422,3.052755724</p> <p>C,0,-1.5786194798,4.223227215,3.5064184742</p> <p>C,0,-2.2710854899,5.3578311773,4.0862930922</p> <p>C,0,2.5536629628,-0.0144756909,1.689942043</p> <p>O,0,2.7414942435,1.1859063912,0.8603545207</p> <p>C,0,1.8689220236,1.4547855133,-0.0748726508</p> <p>N,0,2.0879896184,2.5511501121,-0.840112951</p> <p>N,0,1.0086854721,2.6982579283,-1.6782403767</p> <p>C,0,0.1758022264,1.6351010143,-1.5163451748</p> <p>C,0,0.6614465234,0.8440254582,-0.4882897513</p> <p>C,0,3.0805501537,3.5739331579,-0.7180392451</p> <p>C,0,4.4267944588,3.2216482693,-0.7581538851</p> <p>C,0,5.3844523798,4.2240747197,-0.6424552805</p> <p>C,0,4.995521273,5.5561842374,-0.5101663135</p> <p>C,0,3.6434750118,5.8926555307,-0.4800670918</p> <p>C,0,2.6735899568,4.8989137664,-0.5729945513</p> <p>C,0,-1.0576445452,1.486957918,-2.3362573878</p> <p>H,0,3.344247392,0.0861993964,2.4277338899</p> <p>H,0,1.2768614809,-0.5564918054,3.3610632809</p> <p>H,0,-0.78287293,-0.9037838243,2.1198353155</p> <p>H,0,-1.0715021155,-0.3315239427,-0.1957939111</p> <p>H,0,0.3996564677,-1.2747542236,-0.261422192</p> <p>H,0,2.7818790824,-0.8683723481,1.0429476632</p> <p>H,0,-1.1173336033,2.2536399018,-3.1099124857</p> <p>H,0,-1.0873355497,0.507342703,-2.8167674568</p> <p>H,0,-1.9440154718,1.5762660346,-1.7023666444</p> <p>H,0,4.7149963094,2.1855635853,-0.8748831265</p> <p>H,0,6.4352832118,3.9642675588,-0.6680255306</p> <p>H,0,5.7466539266,6.3321528587,-0.4298528442</p> <p>H,0,3.3418603243,6.9268666374,-0.3704783644</p> <p>H,0,1.6195443208,5.1417328571,-0.5190758778</p> <p>H,0,-2.885939168,5.8490819012,3.3294934732</p> <p>H,0,-2.9128597176,5.0228631729,4.9037837202</p> <p>H,0,-1.5459617124,6.0751463954,4.4760827965</p> <p>H,0,1.1487523561,3.2265965338,-2.5294115787</p> |
|    | <p>NH_III_1.log</p> <p>Low frequencies --- -14.2351 -11.1780 -9.6161 -0.0002 0.0003 0.0006</p> <p>Low frequencies --- 10.0637 16.2868 21.8605</p> <p>Zero-point correction= 0.308843 (Hartree/Particle)</p> <p>Thermal correction to Energy= 0.332021</p> <p>Thermal correction to Enthalpy= 0.332965</p> <p>Thermal correction to Gibbs Free Energy= 0.249898</p> <p>Sum of electronic and zero-point Energies= -987.718000</p> <p>Sum of electronic and thermal Energies= -987.694822</p> <p>Sum of electronic and thermal Enthalpies= -987.693878</p> <p>Sum of electronic and thermal Free Energies= -987.776945</p> <p>C,0,-0.7435246157,0.1511412752,0.1844773808</p> <p>N,0,-0.4714518096,-0.1031801351,1.5449564309</p> <p>N,0,0.8616521969,0.1652181382,1.7924503001</p> <p>C,0,1.5097900412,0.5624326494,0.7100679033</p> <p>C,0,0.5604026929,0.637227977,-0.3570722816</p> <p>C,0,-1.379293076,-0.3301190036,2.6159948562</p> <p>C,0,-2.4151987348,-1.2456260548,2.4363705516</p> <p>C,0,-3.3060162768,-1.4646120623,3.4820436292</p> <p>C,0,-3.151924604,-0.7976907162,4.6962980286</p> <p>C,0,-2.1106847741,0.1121933443,4.8634980317</p> <p>C,0,-1.2263369342,0.3629431336,3.8182157567</p> <p>C,0,2.9882090393,0.7265506271,0.6943955402</p> <p>C,0,0.8550290884,0.9903865318,-1.7080841749</p> <p>C,0,-0.0642470129,0.645009493,-2.8537441648</p> <p>O,0,-1.8191438707,-0.0035139829,-0.3430708298</p>                                                                                                                                                                                                                                                                                                                                                                                                                                                                                                                                                                                                                                                                                                                                                                                                                                                                                                                                                                                                                                                                                                                                                                                                                                             |

|     |                                                                                                                                                                                                                                                                                                                                                                                                                                                                                                                                                                                                                                                                                                                                                                                                                                                                                                                                                                                                                                                                                                                                                                                                                                                                                                                                                                                                                                                                                                                                                                                                                                                                                                                                                                                                                                                                                                                                                                                                                                                                                                                                                                                                                                                                                                                                                                                                                                                                                                                                                                                                                                 |
|-----|---------------------------------------------------------------------------------------------------------------------------------------------------------------------------------------------------------------------------------------------------------------------------------------------------------------------------------------------------------------------------------------------------------------------------------------------------------------------------------------------------------------------------------------------------------------------------------------------------------------------------------------------------------------------------------------------------------------------------------------------------------------------------------------------------------------------------------------------------------------------------------------------------------------------------------------------------------------------------------------------------------------------------------------------------------------------------------------------------------------------------------------------------------------------------------------------------------------------------------------------------------------------------------------------------------------------------------------------------------------------------------------------------------------------------------------------------------------------------------------------------------------------------------------------------------------------------------------------------------------------------------------------------------------------------------------------------------------------------------------------------------------------------------------------------------------------------------------------------------------------------------------------------------------------------------------------------------------------------------------------------------------------------------------------------------------------------------------------------------------------------------------------------------------------------------------------------------------------------------------------------------------------------------------------------------------------------------------------------------------------------------------------------------------------------------------------------------------------------------------------------------------------------------------------------------------------------------------------------------------------------------|
|     | <p>C,0,0.2192468005,-0.7736274823,-3.3010142115<br/> C,0,-0.61625603,-1.7884180832,-3.097484812<br/> H,0,1.9107096861,1.0362148583,-1.971551846<br/> H,0,1.1696546558,-0.9412371786,-3.8024424158<br/> H,0,3.3766321917,0.9210423332,1.6953248827<br/> H,0,3.4543263282,-0.1883435225,0.3150631459<br/> H,0,3.2767422872,1.5504233793,0.043531291<br/> H,0,-2.5215640268,-1.7628972879,1.4935331416<br/> H,0,-4.1172090192,-2.169543908,3.3489719905<br/> H,0,-3.8437211495,-0.9830854593,5.5084251439<br/> H,0,-1.9949686807,0.6430120521,5.8003063919<br/> H,0,-0.4479696057,1.1089399849,3.9335394363<br/> H,0,1.2472497195,-0.0620904914,2.6999982065<br/> H,0,-0.3773634679,-2.7890123273,-3.4388398381<br/> H,0,-1.5680291926,-1.6456692378,-2.5972513501<br/> H,0,-1.1055106487,0.7397023542,-2.5522610936<br/> H,0,0.1307334662,1.3416527693,-3.6745333521<br/> Pd,0,0.437976657,2.7647279843,-0.705006557<br/> N,0,0.3726872844,4.5859172835,-1.6864818591<br/> C,0,0.2817016961,5.5894325825,-2.2409577842<br/> C,0,0.1652008791,6.8517131327,-2.944076325<br/> H,0,-0.3464105627,7.5806322062,-2.3121115042<br/> H,0,1.1577602199,7.2303928006,-3.1962300873<br/> H,0,-0.4092011672,6.7108110484,-3.8620895495</p>                                                                                                                                                                                                                                                                                                                                                                                                                                                                                                                                                                                                                                                                                                                                                                                                                                                                                                                                                                                                                                                                                                                                                                                                                                                                                                                                                                                                   |
| S09 | <p>NH_I_4b2a.log</p> <p>Low frequencies --- -13.9594 -11.1037 -9.9765 -0.0007 -0.0003 0.0006<br/> Low frequencies --- 13.8903 19.3672 24.1823</p> <p>Zero-point correction= 0.310630 (Hartree/Particle)<br/> Thermal correction to Energy= 0.332190<br/> Thermal correction to Enthalpy= 0.333134<br/> Thermal correction to Gibbs Free Energy= 0.255627<br/> Sum of electronic and zero-point Energies= -987.717916<br/> Sum of electronic and thermal Energies= -987.696357<br/> Sum of electronic and thermal Enthalpies= -987.695413<br/> Sum of electronic and thermal Free Energies= -987.772920</p> <p>C,0,-0.0112439935,-0.0254778016,-0.0077190121<br/> C,0,-0.007945627,-0.0180110502,1.3778266793<br/> C,0,1.1649080477,-0.0141443642,2.1188679974<br/> C,0,2.3770837826,-0.0159113311,1.4372964355<br/> C,0,2.4006131394,-0.0210676858,0.0421973923<br/> C,0,1.2101839418,-0.0248146451,-0.6790618249<br/> N,0,-1.2975996064,-0.0600864626,2.0862321491<br/> C,0,-1.6454763116,-1.4611232253,2.6314791391<br/> C,0,-1.8538791301,-1.2606941053,3.9721724516<br/> C,0,-1.6978869151,0.1474081723,4.2323233185<br/> N,0,-1.3794981376,0.8910287181,3.2055183402<br/> O,0,-1.666502152,-2.3962505348,1.8033561862<br/> Pd,0,-1.9441120151,-4.3812030163,2.6465322657<br/> N,0,-2.0364176547,-5.3286102833,0.7766049303<br/> C,0,-2.0732881559,-5.8194655759,-0.2609910666<br/> C,0,-2.2758126582,-2.3145312255,4.9637166895<br/> C,0,-1.7144299719,-3.6794408251,4.6463815412<br/> C,0,-2.4988413632,-4.8536430944,4.6675260337<br/> C,0,-1.9692274964,-6.0066445754,4.0494936038<br/> C,0,-1.8759071796,0.7964120449,5.5622311776<br/> H,0,-3.3690990483,-2.3729708733,5.0179583114<br/> H,0,-3.5619483979,-4.7889895869,4.8794577866<br/> H,0,-2.8877420791,0.6212959701,5.9378034829<br/> H,0,-1.1779047665,0.370802254,6.2886328884<br/> H,0,-1.7027158327,1.8687580976,5.4870644169<br/> H,0,-0.9440535515,-0.0308293337,-0.5602707077<br/> H,0,1.2264317774,-0.0201982074,-1.7616245166<br/> H,0,3.3487194264,-0.0142237594,-0.4811039388<br/> H,0,3.3043047867,-0.0025714027,1.996347854<br/> H,0,1.1302035911,0.0127702007,3.1996652494<br/> H,0,-1.9323263221,-2.0234543779,5.9628267252<br/> H,0,-0.6336681924,-3.7794155332,4.7379373167<br/> H,0,-2.6181057167,-6.8522495146,3.8573373466<br/> H,0,-0.9093531484,-6.2319315771,4.1239044841<br/> H,0,-2.0335008618,0.20750226,1.4273432815<br/> C,0,-2.1220916504,-6.4403246473,-1.5706841442<br/> H,0,-1.7760258814,-5.7346506467,-2.3283694766<br/> H,0,-1.4818004645,-7.3245264847,-1.5860723676<br/> H,0,-3.1471696327,-6.7377238516,-1.8008129471</p> |
| S10 | <p>NH_IV_3b.log</p> <p>Low frequencies --- -16.8193 -10.1261 -8.9400 0.0004 0.0005 0.0006<br/> Low frequencies --- 8.4783 9.8894 22.8303</p>                                                                                                                                                                                                                                                                                                                                                                                                                                                                                                                                                                                                                                                                                                                                                                                                                                                                                                                                                                                                                                                                                                                                                                                                                                                                                                                                                                                                                                                                                                                                                                                                                                                                                                                                                                                                                                                                                                                                                                                                                                                                                                                                                                                                                                                                                                                                                                                                                                                                                    |

|     |                                                                                                                                                                                                                                                                                                                                                                                                                                                                                                                                                                                                                                                                                                                                                                                                                                                                                                                                                                                                                                                                                                                                                                                                                                                                                                                                                                                                                                                                                                                                                                                                                                                                                                                                                                                                                                                                                                                                                                                                                                                                                                                                                                                                                                                                                                                                                                                                                                                                                                                                                     |
|-----|-----------------------------------------------------------------------------------------------------------------------------------------------------------------------------------------------------------------------------------------------------------------------------------------------------------------------------------------------------------------------------------------------------------------------------------------------------------------------------------------------------------------------------------------------------------------------------------------------------------------------------------------------------------------------------------------------------------------------------------------------------------------------------------------------------------------------------------------------------------------------------------------------------------------------------------------------------------------------------------------------------------------------------------------------------------------------------------------------------------------------------------------------------------------------------------------------------------------------------------------------------------------------------------------------------------------------------------------------------------------------------------------------------------------------------------------------------------------------------------------------------------------------------------------------------------------------------------------------------------------------------------------------------------------------------------------------------------------------------------------------------------------------------------------------------------------------------------------------------------------------------------------------------------------------------------------------------------------------------------------------------------------------------------------------------------------------------------------------------------------------------------------------------------------------------------------------------------------------------------------------------------------------------------------------------------------------------------------------------------------------------------------------------------------------------------------------------------------------------------------------------------------------------------------------------|
| S11 | <p>Zero-point correction= 0.309735 (Hartree/Particle)</p> <p>Thermal correction to Energy= 0.332089</p> <p>Thermal correction to Enthalpy= 0.333033</p> <p>Thermal correction to Gibbs Free Energy= 0.251915</p> <p>Sum of electronic and zero-point Energies= -987.715189</p> <p>Sum of electronic and thermal Energies= -987.692835</p> <p>Sum of electronic and thermal Enthalpies= -987.691890</p> <p>Sum of electronic and thermal Free Energies= -987.773009</p> <p>N,0,-2.0580800882,1.0107805386,2.1636887768</p> <p>N,0,-0.9783747457,0.14726344,2.3283707783</p> <p>C,0,-1.3353509146,-0.7825044836,3.2572059919</p> <p>C,0,-2.6220245094,-0.4448043735,3.751088318</p> <p>C,0,-3.0277083126,0.687407041,3.0902276492</p> <p>C,0,0.1287488117,0.1690630785,1.4336911029</p> <p>C,0,-0.0494866727,0.6028110851,0.120053184</p> <p>C,0,1.0486555169,0.636427262,-0.7344993745</p> <p>C,0,2.3009893605,0.2223843613,-0.2869117907</p> <p>C,0,2.4587837312,-0.2221172792,1.0246923083</p> <p>C,0,1.3771276823,-0.243421604,1.8987521348</p> <p>O,0,-0.6677821564,-1.8093779075,3.6034417325</p> <p>Pd,0,-1.8019983262,-2.8000697645,5.0332010465</p> <p>N,0,-2.8327638281,-3.770304809,6.4509698741</p> <p>C,0,-3.3503552165,-4.385041201,7.2775448788</p> <p>C,0,-4.0007266177,-5.154582372,8.3191153904</p> <p>C,0,-3.2530558304,-1.3673012386,4.7573991593</p> <p>C,0,-4.5598839975,-2.0124892025,4.3138265697</p> <p>C,0,-4.4462635624,-2.8378729176,3.0627340869</p> <p>C,0,-4.8434099663,-4.1021272179,2.9630317571</p> <p>C,0,-4.2648594096,1.5082919713,3.2001911994</p> <p>H,0,-3.3379409076,-0.9166277055,5.7492773381</p> <p>H,0,-4.0084724616,-2.3435121497,2.19896555</p> <p>H,0,-4.0486514867,2.5742766561,3.0964818676</p> <p>H,0,-4.9791706698,1.2356035035,2.4179690301</p> <p>H,0,-4.7394538213,1.3498138057,4.1681083077</p> <p>H,0,1.4920833782,-0.5812355312,2.9191643361</p> <p>H,0,3.4309828236,-0.5453512332,1.375564889</p> <p>H,0,3.1502816885,0.2432008096,-0.9583218668</p> <p>H,0,0.9186258721,0.9730758979,-1.7555486223</p> <p>H,0,-1.0313639432,0.8888290607,-0.2353174926</p> <p>H,0,-1.8126417999,1.9717371593,1.9544306299</p> <p>H,0,-4.7455182961,-4.6569927497,2.0379218998</p> <p>H,0,-5.2877617491,-4.6265226327,3.8034992307</p> <p>H,0,-4.9780617865,-2.6083776569,5.1269140622</p> <p>H,0,-5.2707600748,-1.1875425101,4.1399175035</p> <p>H,0,-4.0309498924,-6.2086655773,8.0352570181</p> <p>H,0,-3.4483019624,-5.0508448709,9.2553980069</p> <p>H,0,-5.0212138594,-4.7938260104,8.4641755382</p> |
|     | <p>OH_R_5.log</p> <p>Low frequencies --- -18.0107 -7.8069 -7.1069 -0.0009 -0.0005 0.0005</p> <p>Low frequencies --- 13.5985 14.9721 17.3349</p> <p>Zero-point correction= 0.309367 (Hartree/Particle)</p> <p>Thermal correction to Energy= 0.331953</p> <p>Thermal correction to Enthalpy= 0.332898</p> <p>Thermal correction to Gibbs Free Energy= 0.251340</p> <p>Sum of electronic and zero-point Energies= -987.713432</p> <p>Sum of electronic and thermal Energies= -987.690846</p> <p>Sum of electronic and thermal Enthalpies= -987.689902</p> <p>Sum of electronic and thermal Free Energies= -987.771459</p> <p>C,0,-0.0642591739,0.1064756948,-0.3081049607</p> <p>C,0,0.1032893441,0.0600195534,1.1837506563</p> <p>Pd,0,2.1024979062,0.4161555283,2.1099538544</p> <p>N,0,3.8167143424,1.1204933206,3.080702803</p> <p>C,0,4.7631461351,1.5121067209,3.6030859434</p> <p>C,0,5.9558504721,2.003621325,4.2623350352</p> <p>C,0,0.5708759126,-1.0767153922,1.8609975444</p> <p>C,0,0.8904435337,-0.9305522196,3.231534079</p> <p>C,0,-1.4957815809,-0.2593361782,-0.5697696672</p> <p>C,0,-2.0402335701,-1.5293723981,-0.4723845495</p> <p>N,0,-3.3609952463,-1.4362474446,-0.7708223871</p> <p>N,0,-3.7061712051,-0.1416264213,-1.0826660155</p> <p>C,0,-2.5975611093,0.5670553426,-0.9417582156</p> <p>C,0,-4.2914218842,-2.5014326336,-0.9062289491</p> <p>C,0,-5.1100982502,-2.5558942424,-2.0336488078</p> <p>C,0,-6.0055752049,-3.6103001491,-2.1703798621</p> <p>C,0,-6.073753594,-4.6120433108,-1.2014104314</p> <p>C,0,-5.2583766527,-4.5456814011,-0.075270525</p> <p>C,0,-4.3717420329,-3.4818829613,0.0854070798</p>                                                                                                                                                                                                                                                                                                                                                                                                                                                                                                                                                                                                                                                                                                                                                                                                                                                                                                         |

|     |                                                                                                                                                                                                                                                                                                                                                                                                                                                                                                                                                                                                                                                                                                                                                                                                                                                                                                                                                                                                                                                                                                                                                                                                                                                                                                                                                                                                                                                                                                                                                                                                                                                                                                                                                                                                                                                                                                                                                                                                                                                                                                                                                                                                                                                                                                                                                                                                                                                                                                                                                                                                 |
|-----|-------------------------------------------------------------------------------------------------------------------------------------------------------------------------------------------------------------------------------------------------------------------------------------------------------------------------------------------------------------------------------------------------------------------------------------------------------------------------------------------------------------------------------------------------------------------------------------------------------------------------------------------------------------------------------------------------------------------------------------------------------------------------------------------------------------------------------------------------------------------------------------------------------------------------------------------------------------------------------------------------------------------------------------------------------------------------------------------------------------------------------------------------------------------------------------------------------------------------------------------------------------------------------------------------------------------------------------------------------------------------------------------------------------------------------------------------------------------------------------------------------------------------------------------------------------------------------------------------------------------------------------------------------------------------------------------------------------------------------------------------------------------------------------------------------------------------------------------------------------------------------------------------------------------------------------------------------------------------------------------------------------------------------------------------------------------------------------------------------------------------------------------------------------------------------------------------------------------------------------------------------------------------------------------------------------------------------------------------------------------------------------------------------------------------------------------------------------------------------------------------------------------------------------------------------------------------------------------------|
|     | <p>O,0,-1.3933231745,-2.671620111,-0.1709693973<br/> C,0,-2.5948292625,2.0408255854,-1.1827206989<br/> H,0,0.3169390247,-0.2573632647,3.8618537476<br/> H,0,0.8806105712,-1.9534637051,1.3029723833<br/> H,0,-0.4425268929,0.8123944359,1.7499187487<br/> H,0,0.1383544343,1.1104644683,-0.6864714879<br/> H,0,0.6234081397,-0.5871284466,-0.7980851953<br/> H,0,1.4379672428,-1.7117069293,3.7456859629<br/> H,0,-3.5843425044,2.3594925487,-1.5092903349<br/> H,0,-2.3393078131,2.5963275359,-0.2751582565<br/> H,0,-1.8714775929,2.3149446077,-1.9562725733<br/> H,0,-3.7906358156,-3.3875157567,0.9955868117<br/> H,0,-5.3270829811,-5.3058955065,0.693203788<br/> H,0,-6.7690541935,-5.4338976465,-1.3193755988<br/> H,0,-6.6482295337,-3.6544816456,-3.0411707706<br/> H,0,-5.0415254398,-1.7720738274,-2.7759414569<br/> H,0,-1.9596661758,-3.4366613718,-0.3526190055<br/> H,0,6.4878389304,2.6886923295,3.5987773629<br/> H,0,5.6815144876,2.5310685161,5.1782514022<br/> H,0,6.6106039469,1.1658311595,4.511442302</p>                                                                                                                                                                                                                                                                                                                                                                                                                                                                                                                                                                                                                                                                                                                                                                                                                                                                                                                                                                                                                                                                                                                                                                                                                                                                                                                                                                                                                                                                                                                                                                |
| S12 | <p>NH_R7_2.log</p> <p>Low frequencies --- -18.1590 -12.0391 -11.7886 -0.0009 -0.0005 0.0004<br/> Low frequencies --- 11.6945 16.8524 19.7557</p> <p>Zero-point correction= 0.312528 (Hartree/Particle)<br/> Thermal correction to Energy= 0.334181<br/> Thermal correction to Enthalpy= 0.335125<br/> Thermal correction to Gibbs Free Energy= 0.256973<br/> Sum of electronic and zero-point Energies= -987.707015<br/> Sum of electronic and thermal Energies= -987.685362<br/> Sum of electronic and thermal Enthalpies= -987.684418<br/> Sum of electronic and thermal Free Energies= -987.762570</p> <p>C,0,1.0213619634,1.2631845754,1.1980009322<br/> C,0,0.2233748126,0.173875423,1.5419432827<br/> C,0,0.6863229995,-1.1367218322,1.4287391876<br/> C,0,1.9767043129,-1.3546523733,0.9569907691<br/> C,0,2.7921737386,-0.2754768166,0.6199273991<br/> C,0,2.3154442027,1.0283400611,0.7445569133<br/> N,0,-1.1092178154,0.3944684748,1.998182297<br/> C,0,-1.5835287566,1.2975623768,2.8671174379<br/> C,0,-3.0219942089,1.2106714614,2.9188067487<br/> C,0,-3.3648509164,0.2275359339,1.9421429268<br/> N,0,-2.1664328993,-0.3607032035,1.4880643109<br/> O,0,-0.7318507744,2.0251512452,3.5482386934<br/> C,0,-1.1725090361,2.6341322166,4.8222873534<br/> C,0,-2.3236281699,3.5822218664,4.6788236688<br/> C,0,-4.6181776048,-0.5824922596,1.8192000438<br/> C,0,-3.8568387131,1.7119488598,4.0770271974<br/> C,0,-3.5505723809,3.1622816126,4.3707357053<br/> H,0,-0.2707498428,3.1296452978,5.1686429912<br/> H,0,-2.1272027302,4.6351253813,4.8424828301<br/> H,0,-4.3605463871,3.8777478376,4.2843700049<br/> H,0,-4.9112998021,1.5858759324,3.8375557105<br/> H,0,-3.6659186193,1.0968026429,4.9673819622<br/> H,0,-1.3993253503,1.8055271496,5.4977938247<br/> H,0,-4.7604484931,-0.9203906568,0.7907539722<br/> H,0,-4.5650426868,-1.4646655556,2.4655015704<br/> H,0,-5.4875054739,0.0092439028,2.0998743702<br/> H,0,0.0504489899,-1.9644938816,1.7165354539<br/> H,0,2.348230906,-2.367628609,0.8654969248<br/> H,0,3.7986014539,-0.4506588347,0.2605256723<br/> H,0,2.9475481816,1.8662522987,0.4781420535<br/> H,0,0.6358016393,2.2700038516,1.2846061879<br/> H,0,-2.0675731599,-0.5368015765,0.4922395653<br/> Pd,0,-3.5546033657,2.2311730247,1.111835156<br/> N,0,-4.1577902952,3.2714092819,-0.5743753938<br/> C,0,-4.5157206191,3.8920922447,-1.4746726876<br/> C,0,-4.9687251094,4.670937509,-2.6113863223<br/> H,0,-4.8662658432,5.73624883,-2.3946569539<br/> H,0,-4.3707137035,4.427849902,-3.491987871<br/> H,0,-6.0175659715,4.4497538333,-2.8194651443</p> |
| S13 | <p>NH_III_3.log</p> <p>Low frequencies --- -17.0903 -14.2031 -12.4505 -0.0008 -0.0006 -0.0004<br/> Low frequencies --- 11.0519 16.9022 17.0593</p> <p>Zero-point correction= 0.308576 (Hartree/Particle)<br/> Thermal correction to Energy= 0.331177<br/> Thermal correction to Enthalpy= 0.332121</p>                                                                                                                                                                                                                                                                                                                                                                                                                                                                                                                                                                                                                                                                                                                                                                                                                                                                                                                                                                                                                                                                                                                                                                                                                                                                                                                                                                                                                                                                                                                                                                                                                                                                                                                                                                                                                                                                                                                                                                                                                                                                                                                                                                                                                                                                                          |



|     |                                                                                                                                                                                                                                                                                                                                                                                                                                                                                                                                                                                                                                                                                                                                                                                                                                                                                                                                                                                                                                                                                                                                                                                                                                                                                                                                                                                                                                                                                                                                                                                                                                                                                                                                                                                                                                                                                                                                                                                                                                                                                                                                                                                                                                                                                          |
|-----|------------------------------------------------------------------------------------------------------------------------------------------------------------------------------------------------------------------------------------------------------------------------------------------------------------------------------------------------------------------------------------------------------------------------------------------------------------------------------------------------------------------------------------------------------------------------------------------------------------------------------------------------------------------------------------------------------------------------------------------------------------------------------------------------------------------------------------------------------------------------------------------------------------------------------------------------------------------------------------------------------------------------------------------------------------------------------------------------------------------------------------------------------------------------------------------------------------------------------------------------------------------------------------------------------------------------------------------------------------------------------------------------------------------------------------------------------------------------------------------------------------------------------------------------------------------------------------------------------------------------------------------------------------------------------------------------------------------------------------------------------------------------------------------------------------------------------------------------------------------------------------------------------------------------------------------------------------------------------------------------------------------------------------------------------------------------------------------------------------------------------------------------------------------------------------------------------------------------------------------------------------------------------------------|
| S14 | <p>Thermal correction to Gibbs Free Energy= 0.251494<br/> Sum of electronic and zero-point Energies= -987.703075<br/> Sum of electronic and thermal Energies= -987.680474<br/> Sum of electronic and thermal Enthalpies= -987.679530<br/> Sum of electronic and thermal Free Energies= -987.760157</p> <p>C,0,0.4081051825,-0.7458273559,0.1830586802<br/> N,0,-0.288480926,-0.2249867286,1.2646717974<br/> N,0,0.2910163946,0.974436575,1.6984459573<br/> C,0,1.3816444104,1.3179756282,0.9360098084<br/> C,0,1.580050269,0.2070323922,-0.0847003149<br/> C,0,-1.6306824385,-0.5200724297,1.6399155362<br/> C,0,-2.0625974529,-1.847209679,1.6382420044<br/> C,0,-3.3776754243,-2.1270105146,1.9955636<br/> C,0,-4.2471581586,-1.1034737175,2.367569891<br/> C,0,-3.8000965394,0.2155634427,2.373885981<br/> C,0,-2.4922036635,0.5164734843,2.0047883268<br/> C,0,2.5392541293,1.9601745929,1.6503950007<br/> C,0,1.4914060805,0.8812865838,-1.4527445761<br/> C,0,0.2942782125,1.0468077408,-2.1171148118<br/> O,0,0.1006752598,-1.7172448554,-0.4597802204<br/> C,0,0.1835036368,1.6138755015,-3.4505516422<br/> C,0,-0.9783488933,1.6730525232,-4.1139312575<br/> H,0,2.4256850729,1.0968210473,-1.9609578804<br/> H,0,1.0952989119,1.9826786595,-3.9117370644<br/> H,0,2.2070312741,2.7846074269,2.2838078241<br/> H,0,3.0346299716,1.2120125014,2.2816922115<br/> H,0,3.2728274966,2.3437764681,0.9417398179<br/> H,0,-1.385520462,-2.6385518217,1.3520309745<br/> H,0,-3.7190479594,-3.1547922444,1.9911051173<br/> H,0,-5.2662213121,-1.3329864138,2.6528062966<br/> H,0,-4.4714781268,1.0165044826,2.658608121<br/> H,0,-2.1492300007,1.5431115664,1.9852912079<br/> H,0,0.2916780563,1.1130218112,2.7027001649<br/> H,0,-1.0376787146,2.0826990906,-5.1143285838<br/> H,0,-1.8998655403,1.3046140109,-3.6756554946<br/> H,0,-0.6121243192,0.6140919699,-1.7032329845<br/> H,0,2.5324452829,-0.3149877104,0.0423393814<br/> Pd,0,0.7669049511,2.7368134542,-0.5620617059<br/> N,0,0.4023843778,4.4989969421,0.5152057552<br/> C,0,0.1966295299,5.5249088112,0.9928264867<br/> C,0,-0.0647272473,6.8207282612,1.5883529832<br/> H,0,-0.3184015303,7.5393896572,0.8061573658<br/> H,0,-0.8982293874,6.7473468704,2.2898494794<br/> H,0,0.8224962639,7.1712168479,2.1197582541</p> |
|     | <p>MH_R_5.log</p> <p>Low frequencies --- -20.4646 -16.0252 -11.7041 -0.0005 0.0003 0.0008<br/> Low frequencies --- 5.1916 23.0888 37.2593</p> <p>Zero-point correction= 0.309541 (Hartree/Particle)<br/> Thermal correction to Energy= 0.330475<br/> Thermal correction to Enthalpy= 0.331419<br/> Thermal correction to Gibbs Free Energy= 0.256550<br/> Sum of electronic and zero-point Energies= -987.698548<br/> Sum of electronic and thermal Energies= -987.677614<br/> Sum of electronic and thermal Enthalpies= -987.676670<br/> Sum of electronic and thermal Free Energies= -987.751539</p> <p>C,0,0.0761754098,-0.7082572671,-0.1015436929<br/> C,0,0.1781789059,-1.0166319797,1.3778966745<br/> C,0,1.3496394326,-0.7366015509,2.0638185346<br/> Pd,0,0.0618626272,1.0401799895,2.1185950314<br/> N,0,-0.3766494585,3.0326312724,2.3406414076<br/> C,0,-0.4221613926,4.1797913349,2.3247651781<br/> C,0,-0.466867796,5.6256349548,2.3049646295<br/> C,0,2.655533548,-0.3944069973,1.3551535689<br/> O,0,2.7422850881,0.9102131192,0.7331656455<br/> C,0,1.6781524979,1.3650962799,0.0619324001<br/> N,0,1.6350308016,2.6457415196,-0.393046513<br/> N,0,0.4444500855,2.8879797567,-1.0412354802<br/> C,0,-0.2504264865,1.7721960306,-0.9942220275<br/> C,0,0.4592102582,0.7482866907,-0.2834877738<br/> C,0,2.5184500952,3.7403041626,-0.1404331069<br/> C,0,3.8442543366,3.5361442384,0.244842227<br/> C,0,4.6573371713,4.6391903119,0.4950556696<br/> C,0,4.1678440836,5.9337829318,0.3498879341<br/> C,0,2.8492324369,6.1253963999,-0.0594399719<br/> C,0,2.0196412355,5.0361758501,-0.3023726434<br/> C,0,-1.5948975471,1.6641090046,-1.6305744707<br/> H,0,3.47751113,-0.3943517453,2.0654674446</p>                                                                                                                                                                                                                                                                                                                                                                                                                                                                                                                                                                   |

|     |                                                                                                                                                                                                                                                                                                                                                                                                                                                                                                                                                                                                                                                                                                                                                                                                                                                                                                                                                                                                                                                                                                                                                                                                                                                                                                                                                                                                                                                                                                                                                                                                                                                                                                                                                                                                                                                                                                                                                                                                                                                                                                                                                                                                                                                                                                                                                                                                                                                                                                     |
|-----|-----------------------------------------------------------------------------------------------------------------------------------------------------------------------------------------------------------------------------------------------------------------------------------------------------------------------------------------------------------------------------------------------------------------------------------------------------------------------------------------------------------------------------------------------------------------------------------------------------------------------------------------------------------------------------------------------------------------------------------------------------------------------------------------------------------------------------------------------------------------------------------------------------------------------------------------------------------------------------------------------------------------------------------------------------------------------------------------------------------------------------------------------------------------------------------------------------------------------------------------------------------------------------------------------------------------------------------------------------------------------------------------------------------------------------------------------------------------------------------------------------------------------------------------------------------------------------------------------------------------------------------------------------------------------------------------------------------------------------------------------------------------------------------------------------------------------------------------------------------------------------------------------------------------------------------------------------------------------------------------------------------------------------------------------------------------------------------------------------------------------------------------------------------------------------------------------------------------------------------------------------------------------------------------------------------------------------------------------------------------------------------------------------------------------------------------------------------------------------------------------------|
|     | H,0,1.4620795195,-1.1083750782,3.0763487049<br>H,0,-0.6069023823,-1.5833522668,1.8664687482<br>H,0,-0.9473977451,-0.8524956841,-0.4456656038<br>H,0,0.7058677373,-1.3855570444,-0.6910532391<br>H,0,2.8559431693,-1.1498585538,0.58872764<br>H,0,-1.8863545453,2.6306809521,-2.0399758935<br>H,0,-1.5871220528,0.9351240847,-2.4456469264<br>H,0,-2.3515856894,1.3466631746,-0.907819021<br>H,0,4.2441707933,2.5394362381,0.3409677119<br>H,0,5.6862924998,4.4779101755,0.7923367695<br>H,0,4.8111483847,6.7845579468,0.536706501<br>H,0,2.4658038713,7.1285847457,-0.2046834713<br>H,0,1.0047000135,5.1713239263,-0.6470058978<br>H,0,-1.1791678489,5.9598261541,1.5477290338<br>H,0,-0.773296445,6.0022456274,3.2828781489<br>H,0,0.5262617606,6.0069154917,2.0564828618<br>H,0,-0.2174531162,0.772767664,3.5943361273                                                                                                                                                                                                                                                                                                                                                                                                                                                                                                                                                                                                                                                                                                                                                                                                                                                                                                                                                                                                                                                                                                                                                                                                                                                                                                                                                                                                                                                                                                                                                                                                                                                                            |
| S15 | NH_R7_4.log<br><br>Low frequencies --- -14.2014 -11.4664 -9.6103 -0.0004 0.0005 0.0007<br>Low frequencies --- 18.7273 24.6718 25.4302<br><br>Zero-point correction= 0.312809 (Hartree/Particle)<br>Thermal correction to Energy= 0.334302<br>Thermal correction to Enthalpy= 0.335247<br>Thermal correction to Gibbs Free Energy= 0.257913<br>Sum of electronic and zero-point Energies= -987.696220<br>Sum of electronic and thermal Energies= -987.674727<br>Sum of electronic and thermal Enthalpies= -987.673782<br>Sum of electronic and thermal Free Energies= -987.751117<br><br>C,0,-0.0979853166,1.1520107089,0.4251975169<br>C,0,-0.1346215378,0.1352486008,1.3779181828<br>C,0,0.9676781704,-0.6746919927,1.6224736393<br>C,0,2.1352415285,-0.4645057138,0.891425761<br>C,0,2.1838469956,0.5436989635,-0.0684885135<br>C,0,1.0698913222,1.3513161863,-0.3021436112<br>N,0,-1.3386853761,-0.0897103585,2.1364328019<br>C,0,-1.8394033871,0.7914009294,3.0739286933<br>C,0,-3.2182601279,0.7071958363,3.1533138054<br>C,0,-3.625109845,-0.2272097542,2.1563544433<br>N,0,-2.4592406311,-0.621077039,1.4606447761<br>O,0,-0.9502571917,1.5396168724,3.6908472337<br>C,0,-1.4161964848,2.3162449474,4.8492813155<br>C,0,-2.4791940429,3.3140741289,4.5004701769<br>C,0,-4.8129367418,-1.1408857796,2.244958353<br>C,0,-4.1448953675,1.5031141453,4.0336014081<br>C,0,-3.7125280928,2.9484624993,4.1506824376<br>H,0,-0.5081890476,2.7911549348,5.2086351745<br>H,0,-2.2130145403,4.3638238434,4.5430821351<br>H,0,-4.448162914,3.7099973932,3.9150434404<br>H,0,-5.1486817968,1.4552810237,3.6099645884<br>H,0,-4.2198144231,1.0543729479,5.0330734846<br>H,0,-1.7565223601,1.5942391389,5.5971303169<br>H,0,-4.9363557545,-1.7334737964,1.3384212747<br>H,0,-4.7046814718,-1.8138113555,3.1030788919<br>H,0,-5.7212157805,-0.5553197383,2.3875137121<br>H,0,0.9103944418,-1.4469694594,2.3794555251<br>H,0,3.0031068117,-1.0859721844,1.0731470494<br>H,0,3.0928338548,0.704046747,-0.635391302<br>H,0,1.1140840445,2.136430025,-1.0467529817<br>H,0,-0.9748010665,1.7699449252,0.2633157104<br>H,0,-2.3274661231,-1.5922369804,1.1908940498<br>Pd,0,-3.5913502446,0.6287149644,0.1526478029<br>N,0,-4.8855246823,1.7741115468,-0.944252701<br>C,0,-5.5824354454,2.3939604592,-1.6180819746<br>C,0,-6.4632141295,3.1716647127,-2.4684565186<br>H,0,-7.3569441597,2.5915470584,-2.7072631834<br>H,0,-6.7590707941,4.0907214282,-1.9585883323<br>H,0,-5.9486078307,3.4295121497,-3.3964445173 |
| S16 | NH_R_3a.log<br><br>Low frequencies --- -13.9489 -13.4401 -12.9252 0.0005 0.0006 0.0008<br>Low frequencies --- 10.6701 24.3136 25.1720<br><br>Zero-point correction= 0.312525 (Hartree/Particle)<br>Thermal correction to Energy= 0.333848<br>Thermal correction to Enthalpy= 0.334792<br>Thermal correction to Gibbs Free Energy= 0.257562<br>Sum of electronic and zero-point Energies= -987.676174<br>Sum of electronic and thermal Energies= -987.654852                                                                                                                                                                                                                                                                                                                                                                                                                                                                                                                                                                                                                                                                                                                                                                                                                                                                                                                                                                                                                                                                                                                                                                                                                                                                                                                                                                                                                                                                                                                                                                                                                                                                                                                                                                                                                                                                                                                                                                                                                                         |

|      |                                                                                                                                                                                                                                                                                                                                                                                                                                                                                                                                                                                                                                                                                                                                                                                                                                                                                                                                                                                                                                                                                                                                                                                                                                                                                                                                                                                                                                                                                                                                                                                                                                                                                                                                                                                                                                                                                                                                                                                                                                                       |
|------|-------------------------------------------------------------------------------------------------------------------------------------------------------------------------------------------------------------------------------------------------------------------------------------------------------------------------------------------------------------------------------------------------------------------------------------------------------------------------------------------------------------------------------------------------------------------------------------------------------------------------------------------------------------------------------------------------------------------------------------------------------------------------------------------------------------------------------------------------------------------------------------------------------------------------------------------------------------------------------------------------------------------------------------------------------------------------------------------------------------------------------------------------------------------------------------------------------------------------------------------------------------------------------------------------------------------------------------------------------------------------------------------------------------------------------------------------------------------------------------------------------------------------------------------------------------------------------------------------------------------------------------------------------------------------------------------------------------------------------------------------------------------------------------------------------------------------------------------------------------------------------------------------------------------------------------------------------------------------------------------------------------------------------------------------------|
|      | <p>Sum of electronic and thermal Enthalpies= -987.653907<br/>Sum of electronic and thermal Free Energies= -987.731138</p> <p>O,0,0.0069035945,0.154338928,0.0184561349<br/>C,0,0.0547620806,0.0124724015,1.3146583718<br/>C,0,0.9789498753,0.0214551182,2.2933971013<br/>C,0,0.2447852514,-0.25339848,3.5285554725<br/>C,0,0.8609062115,-0.3479542779,4.8787694325<br/>N,0,-1.0374560064,-0.4054509278,3.3904040553<br/>N,0,-1.2710012696,-0.2216964176,1.9346233036<br/>C,0,-2.2825016827,0.8310081137,1.674434449<br/>C,0,-1.8837757653,2.158670118,1.6773501755<br/>C,0,-2.8558691682,3.1301522502,1.4646326503<br/>C,0,-4.1867935556,2.765841413,1.2625291436<br/>C,0,-4.5574035626,1.4229616339,1.2677090535<br/>C,0,-3.5959874579,0.4369215219,1.4763039312<br/>C,0,2.4444091033,0.3251799242,2.1998103288<br/>C,0,2.8353948995,1.2536612905,1.0719341219<br/>Pd,0,1.5816424412,2.9587810035,0.8069094959<br/>N,0,0.9031361138,4.7545571679,1.6237160406<br/>C,0,0.6455338916,5.8204244731,1.97457123<br/>C,0,0.3373707863,7.1669121747,2.4183428432<br/>C,0,1.2860915927,0.221676672,-0.7107973785<br/>C,0,2.2791277368,1.2346221501,-0.2116770977<br/>H,0,0.9704365144,0.4510727799,-1.7243762249<br/>H,0,2.8801573185,1.6419951436,-1.0217630751<br/>H,0,3.8290391056,1.6781712606,1.1824422018<br/>H,0,2.758649686,0.7738543165,3.1449074285<br/>H,0,3.0163841003,-0.611389155,2.1149907109<br/>H,0,1.6925564478,-0.7953486468,-0.6857062592<br/>H,0,0.1101280502,-0.6067632804,5.6233170195<br/>H,0,1.6538166089,-1.1002758897,4.8819043604<br/>H,0,1.3160159407,0.6101054483,5.1461144035<br/>H,0,-3.8749898671,-0.6109539814,1.4916237978<br/>H,0,-5.5898302809,1.138955745,1.1093303722<br/>H,0,-4.9365222301,3.5292783914,1.0954298054<br/>H,0,-2.5669254517,4.1734295571,1.4479087082<br/>H,0,-0.8414651106,2.4324513403,1.8088736046<br/>H,0,-0.2953170261,7.135872355,3.3076355885<br/>H,0,1.2618595254,7.6968718978,2.65718404<br/>H,0,-0.1849652558,7.7079637867,1.626599775<br/>H,0,-1.6492069809,-1.1147204585,1.6017932318</p> |
| MeCN | <p>ACN_SMD.log</p> <p>Low frequencies --- -26.4452 -21.9287 -0.0014 -0.0011 -0.0008 32.3575<br/>Low frequencies --- 401.5251 402.5779 932.9815</p> <p>Zero-point correction= 0.045047 (Hartree/Particle)<br/>Thermal correction to Energy= 0.048621<br/>Thermal correction to Enthalpy= 0.049566<br/>Thermal correction to Gibbs Free Energy= 0.021065<br/>Sum of electronic and zero-point Energies= -132.766892<br/>Sum of electronic and thermal Energies= -132.763317<br/>Sum of electronic and thermal Enthalpies= -132.762373<br/>Sum of electronic and thermal Free Energies= -132.790874</p> <p>C,0,0.0001283283,-0.0000059461,-0.0021245724<br/>C,0,0.0000277465,-0.0007162794,1.4482185438<br/>N,0,-0.0000454568,0.0004906328,2.6020942087<br/>H,0,-0.9576746742,0.3716369199,-0.3721309148<br/>H,0,0.8007370039,0.643759869,-0.3723645219<br/>H,0,0.1569345309,-1.0151898995,-0.3724060583</p>                                                                                                                                                                                                                                                                                                                                                                                                                                                                                                                                                                                                                                                                                                                                                                                                                                                                                                                                                                                                                                                                                                                                             |
| 1a   | <p>R7b_SMD.log</p> <p>Low frequencies --- -15.2305 -13.1281 -4.6286 -0.0004 -0.0004 -0.0002<br/>Low frequencies --- 27.4166 43.4270 58.7770</p> <p>Zero-point correction= 0.251908 (Hartree/Particle)<br/>Thermal correction to Energy= 0.266318<br/>Thermal correction to Enthalpy= 0.267262<br/>Thermal correction to Gibbs Free Energy= 0.209131<br/>Sum of electronic and zero-point Energies= -726.619483<br/>Sum of electronic and thermal Energies= -726.605073<br/>Sum of electronic and thermal Enthalpies= -726.604129<br/>Sum of electronic and thermal Free Energies= -726.662260</p> <p>C,0,-0.0042284582,-0.1175886283,0.0072404023<br/>C,0,0.0056201955,-0.0078064272,1.4001649427<br/>C,0,1.2157077349,0.1082652175,2.0899402358<br/>C,0,2.4138893888,0.1147693164,1.3814184607</p>                                                                                                                                                                                                                                                                                                                                                                                                                                                                                                                                                                                                                                                                                                                                                                                                                                                                                                                                                                                                                                                                                                                                                                                                                                                   |

|   |                                                                                                                                                                                                                                                                                                                                                                                                                                                                                                                                                                                                                                                                                                                                                                                                                                                                                                                                                                                                                                                                                                                                                                                                                                                                                                                                                                                                                                                                                                                                                                                                                                                                                                                                                                                                                                                                                                                                                                                                                                                                                                                                                                                                                                                                                                                                                                                                                                                             |
|---|-------------------------------------------------------------------------------------------------------------------------------------------------------------------------------------------------------------------------------------------------------------------------------------------------------------------------------------------------------------------------------------------------------------------------------------------------------------------------------------------------------------------------------------------------------------------------------------------------------------------------------------------------------------------------------------------------------------------------------------------------------------------------------------------------------------------------------------------------------------------------------------------------------------------------------------------------------------------------------------------------------------------------------------------------------------------------------------------------------------------------------------------------------------------------------------------------------------------------------------------------------------------------------------------------------------------------------------------------------------------------------------------------------------------------------------------------------------------------------------------------------------------------------------------------------------------------------------------------------------------------------------------------------------------------------------------------------------------------------------------------------------------------------------------------------------------------------------------------------------------------------------------------------------------------------------------------------------------------------------------------------------------------------------------------------------------------------------------------------------------------------------------------------------------------------------------------------------------------------------------------------------------------------------------------------------------------------------------------------------------------------------------------------------------------------------------------------------|
|   | C,0,2.4128624297,0.0205234237,-0.010555839<br>C,0,1.2009853593,-0.092705333,-0.690978795<br>N,0,-1.206089333,-0.0325568645,2.1336383002<br>C,0,-2.4186212027,0.5231121507,1.8153277242<br>C,0,-3.2835480418,0.2896610273,2.864117018<br>C,0,-2.5012629451,-0.4363241654,3.803841206<br>N,0,-1.2603312367,-0.632135644,3.3661419597<br>O,0,-2.59022245,1.1655667802,0.6491450879<br>C,0,-3.236980051,2.462226258,0.7432558263<br>C,0,-4.6839289658,2.4389631915,1.1476989282<br>C,0,-5.2913597562,1.687273891,2.0692597815<br>C,0,-4.7368891016,0.6292093517,2.9792521254<br>C,0,-2.9481145578,-0.9737847736,5.1229698137<br>H,0,-3.142055202,2.8777195475,-0.2589968014<br>H,0,-5.2913683914,3.1667135261,0.6154308048<br>H,0,-6.3583337925,1.8493425796,2.2037360904<br>H,0,-4.9559627988,0.9356552774,4.0103927309<br>H,0,-5.3368948468,-0.281073034,2.8370963623<br>H,0,-2.6446739763,3.0838147226,1.4238595444<br>H,0,-2.1199614163,-1.4733818513,5.62880105<br>H,0,-3.3179264445,-0.1725411618,5.7702089433<br>H,0,-3.7639317545,-1.6930063869,5.0004722689<br>H,0,1.2092175013,0.1932627098,3.168471569<br>H,0,3.3501512264,0.2036562611,1.9205355218<br>H,0,3.3475497238,0.032012617,-0.5589894312<br>H,0,1.1890996041,-0.1769742351,-1.7716513594<br>H,0,-0.9403010673,-0.2268423761,-0.5219323406                                                                                                                                                                                                                                                                                                                                                                                                                                                                                                                                                                                                                                                                                                                                                                                                                                                                                                                                                                                                                                                                                                                                                  |
| 5 | R7_1b_SMD.log<br><br>Low frequencies --- -13.6718 -11.5925 -5.2754 0.0001 0.0001 0.0004<br>Low frequencies --- 13.4844 21.2684 35.4833<br><br>Zero-point correction= 0.299414 (Hartree/Particle)<br>Thermal correction to Energy= 0.320458<br>Thermal correction to Enthalpy= 0.321402<br>Thermal correction to Gibbs Free Energy= 0.245561<br>Sum of electronic and zero-point Energies= -987.363406<br>Sum of electronic and thermal Energies= -987.342363<br>Sum of electronic and thermal Enthalpies= -987.341418<br>Sum of electronic and thermal Free Energies= -987.417260<br><br>C,0,-0.0370657227,0.470668387,-0.0278043346<br>C,0,0.0170309457,0.1733251746,1.3365443327<br>C,0,1.2450682495,-0.0746970162,1.9551962932<br>C,0,2.4172479909,-0.0247838884,1.2056133253<br>C,0,2.3709439925,0.2571249113,-0.1597415191<br>C,0,1.1409904521,0.501619096,-0.7703542251<br>N,0,-1.1658909028,0.140843789,2.1165627561<br>N,0,-1.1573925605,0.6063850956,3.410832103<br>C,0,-2.3833367596,0.3785071586,3.8720264953<br>C,0,-3.2118198058,-0.2530622947,2.9035933739<br>C,0,-2.3874867364,-0.3894996345,1.7979182092<br>O,0,-2.5435005002,-0.9554473299,0.5951403536<br>C,0,-3.905393001,-1.2077490121,0.1620002065<br>C,0,-4.7020748565,-2.1726573522,1.0060590327<br>Pd,0,-3.6091510233,-3.5217335442,2.2549247592<br>N,0,-2.4603411793,-4.906133621,3.2820148185<br>C,0,-1.7919693493,-5.6742192452,3.8221501431<br>C,0,-0.957437981,-6.6345337252,4.5097415171<br>C,0,-4.6263783757,-0.7126443054,3.1168229279<br>C,0,-5.0571377604,-1.9300372382,2.3321304836<br>C,0,-2.7621476328,0.7635390658,5.2640638813<br>H,0,-3.7848458392,-1.6001412892,-0.8455387875<br>H,0,-5.3488034272,-2.8192768001,0.4164135768<br>H,0,-5.9546764514,-2.4119800766,2.712825514<br>H,0,-4.7602240393,-0.9172716472,4.1822077156<br>H,0,-5.3342692355,0.0999773923,2.8872037053<br>H,0,-4.4136950422,-0.2379744362,0.0976588968<br>H,0,-1.9031305026,1.1924300367,5.7833369963<br>H,0,-3.5722474337,1.4992597472,5.2668970972<br>H,0,-3.110996198,-0.1054473848,5.8305146275<br>H,0,-0.9876453641,0.6776579113,-0.4989664945<br>H,0,1.0954070778,0.7313904238,-1.8287894663<br>H,0,3.2846645531,0.2885607601,-0.7417887482<br>H,0,3.3677157795,-0.2171042302,1.6901824763<br>H,0,1.2718484176,-0.3054142659,3.011891257<br>H,0,-1.2490226092,-6.6834738628,5.5614012036<br>H,0,-1.0795000381,-7.6208883196,4.0569234251<br>H,0,0.0896360594,-6.3316465745,4.4401365973 |
| 6 | I_3_SMD_2.log                                                                                                                                                                                                                                                                                                                                                                                                                                                                                                                                                                                                                                                                                                                                                                                                                                                                                                                                                                                                                                                                                                                                                                                                                                                                                                                                                                                                                                                                                                                                                                                                                                                                                                                                                                                                                                                                                                                                                                                                                                                                                                                                                                                                                                                                                                                                                                                                                                               |

|       |                                                                                                                                                                                                                                                                                                                                                                                                                                                                                                                                                                                                                                                                                                                                                                                                                                                                                                                                                                                                                                                                                                                                                                                                                                                                                                                                                                                                                                                                                                                                                                                                                                                                                                                                                                                                                                                                                                                                                                                                                                                                                                                                                                                                                                                                                                                                                                                                                                                                                                                                    |
|-------|------------------------------------------------------------------------------------------------------------------------------------------------------------------------------------------------------------------------------------------------------------------------------------------------------------------------------------------------------------------------------------------------------------------------------------------------------------------------------------------------------------------------------------------------------------------------------------------------------------------------------------------------------------------------------------------------------------------------------------------------------------------------------------------------------------------------------------------------------------------------------------------------------------------------------------------------------------------------------------------------------------------------------------------------------------------------------------------------------------------------------------------------------------------------------------------------------------------------------------------------------------------------------------------------------------------------------------------------------------------------------------------------------------------------------------------------------------------------------------------------------------------------------------------------------------------------------------------------------------------------------------------------------------------------------------------------------------------------------------------------------------------------------------------------------------------------------------------------------------------------------------------------------------------------------------------------------------------------------------------------------------------------------------------------------------------------------------------------------------------------------------------------------------------------------------------------------------------------------------------------------------------------------------------------------------------------------------------------------------------------------------------------------------------------------------------------------------------------------------------------------------------------------------|
| TS5/6 | <p>Low frequencies --- -16.0859 -10.3085 -7.7929 -0.0003 0.0002 0.0003<br/> Low frequencies --- 19.9211 25.1465 30.8417</p> <p>Zero-point correction= 0.297094 (Hartree/Particle)<br/> Thermal correction to Energy= 0.318342<br/> Thermal correction to Enthalpy= 0.319286<br/> Thermal correction to Gibbs Free Energy= 0.244058<br/> Sum of electronic and zero-point Energies= -987.389903<br/> Sum of electronic and thermal Energies= -987.368655<br/> Sum of electronic and thermal Enthalpies= -987.367711<br/> Sum of electronic and thermal Free Energies= -987.442940</p> <p>C,0,0.0214937325,0.1027389246,0.0282462903<br/> C,0,0.017674579,0.036176925,1.4296677492<br/> C,0,1.2373855785,-0.0580412443,2.1160993507<br/> C,0,2.4364712522,-0.0832259579,1.4100298412<br/> C,0,2.4447409628,-0.0097525139,0.016769267<br/> C,0,1.2307329618,0.0842415807,-0.663094571<br/> N,0,-1.1862670258,0.0394650725,2.1591564656<br/> N,0,-1.2036722814,-0.4556010338,3.4548058118<br/> C,0,-2.4540550857,-0.2774395047,3.873123733<br/> C,0,-3.2711075526,0.3268494214,2.8906233694<br/> C,0,-2.4328501634,0.5383478751,1.7827930288<br/> O,0,-2.6297185555,1.0783942218,0.6253464359<br/> Pd,0,-4.6285431104,1.5554126174,0.0556707231<br/> N,0,-4.0003983988,2.3831115892,-1.7764028586<br/> C,0,-3.6244400692,2.8010315313,-2.7795934973<br/> C,0,-3.1542763503,3.3273903765,-4.0416653891<br/> C,0,-4.7066217293,0.7591080322,3.0347676859<br/> C,0,-5.4940946782,0.6320180076,1.7571486319<br/> C,0,-6.3732184003,1.6411144422,1.2992071202<br/> C,0,-6.7859996479,1.5954193103,-0.0480261958<br/> C,0,-2.8588428647,-0.707661077,5.2464689056<br/> H,0,-4.7747441357,1.7951122535,3.3895061581<br/> H,0,-6.4760675918,2.5601538326,1.8688849305<br/> H,0,-3.1961580538,0.1438289854,5.8461745448<br/> H,0,-3.6851683922,-1.4246351235,5.2117187473<br/> H,0,-2.0169029375,-1.1768387896,5.7598383281<br/> H,0,-0.9153119622,0.176200277,-0.5025914955<br/> H,0,1.218338348,0.1360511525,-1.7463828386<br/> H,0,3.3809964127,-0.0260610105,-0.5289996704<br/> H,0,3.3704913764,-0.155588511,1.9563825665<br/> H,0,1.2339683221,-0.1108769677,3.1957272934<br/> H,0,-5.1836648335,0.1373777928,3.8021925337<br/> H,0,-5.619297244,-0.3783130879,1.3692348001<br/> H,0,-7.2823572989,2.4577681077,-0.4785600025<br/> H,0,-6.9800961892,0.6415623608,-0.5310291058<br/> H,0,-3.6151942935,2.7745736496,-4.8630707597<br/> H,0,-3.4230049575,4.3829546928,-4.1212775301<br/> H,0,-2.0686008585,3.2251862091,-4.1003923236</p> |
|       | <p>TS_ACN_3a_SMD.log</p> <p>Low frequencies --- -321.0366 -14.0210 -7.8342 -4.4341 0.0003 0.0006<br/> Low frequencies --- 0.0007 13.4078 19.1988</p> <p>Zero-point correction= 0.294744 (Hartree/Particle)<br/> Thermal correction to Energy= 0.316065<br/> Thermal correction to Enthalpy= 0.317009<br/> Thermal correction to Gibbs Free Energy= 0.240405<br/> Sum of electronic and zero-point Energies= -987.322176<br/> Sum of electronic and thermal Energies= -987.300856<br/> Sum of electronic and thermal Enthalpies= -987.299912<br/> Sum of electronic and thermal Free Energies= -987.376515</p> <p>N,0,0.0124195618,-0.1224071327,-0.0663804425<br/> N,0,-0.04885552,-0.1170785665,1.3094723524<br/> C,0,1.2316344058,-0.1003282764,1.8812919689<br/> C,0,2.1230603803,-0.078694949,0.7960180826<br/> C,0,1.3109988627,-0.0954005341,-0.3614027157<br/> C,0,-1.2987376837,-0.096389538,1.9554825026<br/> C,0,-2.4296134586,0.3531003424,1.2586781964<br/> C,0,-3.6737756516,0.3652710724,1.8824369435<br/> C,0,-3.8118297881,-0.0575618616,3.2049107529<br/> C,0,-2.6849298913,-0.5035210847,3.8950877562<br/> C,0,-1.4348120577,-0.5328593977,3.2813928056<br/> O,0,1.458870858,-0.0402434432,3.1451027721<br/> C,0,3.6244041935,-0.079508508,0.7993871013<br/> C,0,4.4050033091,0.1305441669,2.075566873<br/> C,0,4.0841017883,0.994470208,3.1535441268<br/> C,0,2.858367042,1.6401191381,3.3246161966</p>                                                                                                                                                                                                                                                                                                                                                                                                                                                                                                                                                                                                                                                                                                                                                                                                                                                                                                                                                                                                                                                                                                         |

|        |                                                                                                                                                                                                                                                                                                                                                                                                                                                                                                                                                                                                                                                                                                                                                                                                                                                                                                                                                                                                                                                                                                                                                                                                                                                                                                                                                                                                                                                                                                                                                                                                                                                                                                                                                                                                                                                                                                                                                                                                                                                                                                                                                                                                                                                                                                                                                                                                                                                                                                                                                                                                                                                                                                                                             |
|--------|---------------------------------------------------------------------------------------------------------------------------------------------------------------------------------------------------------------------------------------------------------------------------------------------------------------------------------------------------------------------------------------------------------------------------------------------------------------------------------------------------------------------------------------------------------------------------------------------------------------------------------------------------------------------------------------------------------------------------------------------------------------------------------------------------------------------------------------------------------------------------------------------------------------------------------------------------------------------------------------------------------------------------------------------------------------------------------------------------------------------------------------------------------------------------------------------------------------------------------------------------------------------------------------------------------------------------------------------------------------------------------------------------------------------------------------------------------------------------------------------------------------------------------------------------------------------------------------------------------------------------------------------------------------------------------------------------------------------------------------------------------------------------------------------------------------------------------------------------------------------------------------------------------------------------------------------------------------------------------------------------------------------------------------------------------------------------------------------------------------------------------------------------------------------------------------------------------------------------------------------------------------------------------------------------------------------------------------------------------------------------------------------------------------------------------------------------------------------------------------------------------------------------------------------------------------------------------------------------------------------------------------------------------------------------------------------------------------------------------------------|
|        | C,0,1.7679924348,-0.1108447259,-1.7836106372<br>Pd,0,3.8827231828,-1.2177543238,3.5834825445<br>N,0,3.4312918471,-2.6387658693,5.0810866567<br>C,0,3.1659160783,-3.4783780556,5.8241153418<br>C,0,2.8306237027,-4.5270225581,6.7626318907<br>H,0,2.633695003,2.1009071948,4.280115905<br>H,0,4.840069856,1.1460519564,3.9231904852<br>H,0,5.4666228233,-0.0801103236,1.9425692205<br>H,0,3.9820485602,-1.0274845957,0.371664806<br>H,0,3.9821933646,0.6810335559,0.0868311415<br>H,0,2.2657113577,1.9686459848,2.4847228908<br>H,0,2.3730108874,0.7718827197,-2.015305581<br>H,0,2.3893821333,-0.9881256461,-1.9914462389<br>H,0,0.9101623781,-0.1278789927,-2.4589490278<br>H,0,-0.5659463416,-0.8827144919,3.8178845348<br>H,0,-2.7756688808,-0.8428734068,4.9211371409<br>H,0,-4.7817024724,-0.0413828938,3.6883509603<br>H,0,-4.5388089424,0.715546256,1.3301549187<br>H,0,-2.323488222,0.6890647833,0.2366088579<br>H,0,2.9815898825,-5.5020896547,6.294186166<br>H,0,3.4689050806,-4.4488789751,7.6455215449<br>H,0,1.7850867369,-4.4304854898,7.0630581566                                                                                                                                                                                                                                                                                                                                                                                                                                                                                                                                                                                                                                                                                                                                                                                                                                                                                                                                                                                                                                                                                                                                                                                                                                                                                                                                                                                                                                                                                                                                                                                                                                                                           |
| 5.MeCN | R7_2_SMD.log<br><br>Low frequencies --- -17.7758 -14.3619 -8.7177 -0.0007 0.0002 0.0005<br>Low frequencies --- 13.9039 20.7002 34.3023<br><br>Zero-point correction= 0.346002 (Hartree/Particle)<br>Thermal correction to Energy= 0.371739<br>Thermal correction to Enthalpy= 0.372683<br>Thermal correction to Gibbs Free Energy= 0.286760<br>Sum of electronic and zero-point Energies= -1120.143102<br>Sum of electronic and thermal Energies= -1120.117366<br>Sum of electronic and thermal Enthalpies= -1120.116421<br>Sum of electronic and thermal Free Energies= -1120.202344<br><br>C,0,-0.0849104516,-0.0927424471,0.0326926392<br>N,0,-0.1388759111,-0.2234879943,1.3971579077<br>N,0,1.1311541008,-0.2554294839,1.9330661791<br>C,0,1.9533667782,-0.1531646159,0.8925526346<br>C,0,1.2521412717,-0.0514591195,-0.3381681484<br>C,0,-1.2625411362,-0.1532121733,2.254496964<br>C,0,-2.5030912991,-0.6686179566,1.8656944505<br>C,0,-3.5876790603,-0.5817520173,2.7358436156<br>C,0,-3.4456186002,-0.001940173,3.9956261146<br>C,0,-2.2029218656,0.5016955549,4.3802435291<br>C,0,-1.1149970417,0.4364259638,3.5149045477<br>C,0,3.4330149365,-0.1208226103,1.0920316619<br>C,0,1.8330293012,0.281281486,-1.6875123838<br>C,0,1.1383438657,1.4626527434,-2.3500858077<br>Pd,0,0.3131249565,2.8215395889,-0.9576081446<br>N,0,-1.3736366026,3.5147403299,0.2511531838<br>C,0,-2.2481231717,3.4070691621,0.9955762019<br>C,0,-3.3430892317,3.2340204908,1.9260882048<br>O,0,-1.2267012642,0.0151098899,-0.652725816<br>C,0,-1.1178443505,0.2861745177,-2.0857684295<br>C,0,-0.2773356203,1.4778025258,-2.4779918617<br>N,0,1.8498022821,3.6060229837,0.355409292<br>C,0,2.6744774787,3.6659128017,1.1591326111<br>C,0,3.7108619118,3.7131423615,2.1690303894<br>H,0,-2.1534292841,0.4295879658,-2.3873288045<br>H,0,-0.7076144362,2.0306090116,-3.3110561574<br>H,0,1.7280500208,1.9756917336,-3.1075570993<br>H,0,2.8918588668,0.5127730669,-1.5519680212<br>H,0,1.8006553269,-0.5890517797,-2.3602691657<br>H,0,-0.7468343827,-0.6357839871,-2.5501211553<br>H,0,3.6719822184,-0.1923899999,2.1546433956<br>H,0,3.927282033,-0.9450889318,0.5695560728<br>H,0,3.8579678705,0.8102861877,0.7044138717<br>H,0,-2.6171659809,-1.1336033003,0.89752828<br>H,0,-4.5463572675,-0.9822533076,2.4262393216<br>H,0,-4.2926246532,0.0579584852,4.6690338073<br>H,0,-2.0790100437,0.960344133,5.3547595588<br>H,0,-0.1537582433,0.8388377579,3.8033323168<br>H,0,4.6931636161,3.6503455438,1.6960043411<br>H,0,3.642042122,4.646674094,2.731527356<br>H,0,3.588752164,2.8715566265,2.8545114682<br>H,0,-3.7430979639,4.2066875746,2.2202739041<br>H,0,-4.1348707193,2.6467563786,1.4564288585<br>H,0,-2.9872349264,2.7073240983,2.8139098464 |
| 6.MeCN | I_32_SMDd.log                                                                                                                                                                                                                                                                                                                                                                                                                                                                                                                                                                                                                                                                                                                                                                                                                                                                                                                                                                                                                                                                                                                                                                                                                                                                                                                                                                                                                                                                                                                                                                                                                                                                                                                                                                                                                                                                                                                                                                                                                                                                                                                                                                                                                                                                                                                                                                                                                                                                                                                                                                                                                                                                                                                               |

|                       |                                                                                                                                                                                                                                                                                                                                                                                                                                                                                                                                                                                                                                                                                                                                                                                                                                                                                                                                                                                                                                                                                                                                                                                                                                                                                                                                                                                                                                                                                                                                                                                                                                                                                                                                                                                                                                                                                                                                                                                                                                                                                                                                                                                                                                                                                                                                                                                                                                                                                                                                                                                                                                                                                                                                                                                                                                                                                                                                                                           |
|-----------------------|---------------------------------------------------------------------------------------------------------------------------------------------------------------------------------------------------------------------------------------------------------------------------------------------------------------------------------------------------------------------------------------------------------------------------------------------------------------------------------------------------------------------------------------------------------------------------------------------------------------------------------------------------------------------------------------------------------------------------------------------------------------------------------------------------------------------------------------------------------------------------------------------------------------------------------------------------------------------------------------------------------------------------------------------------------------------------------------------------------------------------------------------------------------------------------------------------------------------------------------------------------------------------------------------------------------------------------------------------------------------------------------------------------------------------------------------------------------------------------------------------------------------------------------------------------------------------------------------------------------------------------------------------------------------------------------------------------------------------------------------------------------------------------------------------------------------------------------------------------------------------------------------------------------------------------------------------------------------------------------------------------------------------------------------------------------------------------------------------------------------------------------------------------------------------------------------------------------------------------------------------------------------------------------------------------------------------------------------------------------------------------------------------------------------------------------------------------------------------------------------------------------------------------------------------------------------------------------------------------------------------------------------------------------------------------------------------------------------------------------------------------------------------------------------------------------------------------------------------------------------------------------------------------------------------------------------------------------------------|
| Pd(MeCN) <sub>2</sub> | <p>Low frequencies --- -22.7923 -13.6563 -9.8416 -0.0003 -0.0001 0.0005</p> <p>Low frequencies --- 8.9611 20.5470 27.3565</p> <p>Zero-point correction= 0.343478 (Hartree/Particle)</p> <p>Thermal correction to Energy= 0.369956</p> <p>Thermal correction to Enthalpy= 0.370900</p> <p>Thermal correction to Gibbs Free Energy= 0.281741</p> <p>Sum of electronic and zero-point Energies= -1120.165442</p> <p>Sum of electronic and thermal Energies= -1120.138964</p> <p>Sum of electronic and thermal Enthalpies= -1120.138020</p> <p>Sum of electronic and thermal Free Energies= -1120.227179</p> <p>C,O,-0.1167476494,0.8073116196,-0.3352940223</p> <p>C,O,-0.0066413197,0.3690290031,0.9912636836</p> <p>C,O,1.2589484126,0.0871379997,1.5229526528</p> <p>C,O,2.3949497702,0.2343583416,0.7318645696</p> <p>C,O,2.2883636771,0.6549357132,-0.5942242364</p> <p>C,O,1.0272268003,0.9384218348,-1.1180993847</p> <p>N,O,-1.149690933,0.2124834055,1.7995639892</p> <p>N,O,-1.03503185,0.2798359298,3.1790975553</p> <p>C,O,-2.2482515836,-0.018818868,3.6387497462</p> <p>C,O,-3.1636376048,-0.2996572585,2.5983247155</p> <p>C,O,-2.4360456648,-0.1456590081,1.4076641573</p> <p>O,O,-2.7529586639,-0.2953071315,0.1607651075</p> <p>Pd,O,-4.584639204,-1.2966196783,-0.2950063374</p> <p>N,O,-4.2407027952,-1.1442741798,-2.3695553417</p> <p>C,O,-4.0231756251,-1.0400058764,-3.4938661244</p> <p>C,O,-3.7530158628,-0.9062544437,-4.9077564192</p> <p>C,O,-4.625720974,-0.6383705913,2.718110239</p> <p>C,O,-5.0592950852,-1.6941626775,1.7341795518</p> <p>C,O,-6.2644763563,-1.6138057591,0.9987917692</p> <p>C,O,-6.4017025933,-2.4502338219,-0.1281988778</p> <p>C,O,-2.5213454581,-0.0150769703,5.1088682504</p> <p>N,O,-0.5188138504,-1.2279274333,-3.825115755</p> <p>C,O,-0.716834697,-1.7538885198,-2.8169611835</p> <p>C,O,-0.9765963256,-2.4027188828,-1.5480845035</p> <p>H,O,-5.2552255877,0.2499141351,2.5847169442</p> <p>H,O,-6.9095407381,-0.7480650356,1.1177236004</p> <p>H,O,-3.2671891346,0.7411690456,5.3739208506</p> <p>H,O,-2.9100582711,-0.9824451669,5.442059269</p> <p>H,O,-1.6053412538,0.1977615451,5.6639423186</p> <p>H,O,-1.0910065701,1.0255774842,-0.745754693</p> <p>H,O,0.9272922109,1.2693951311,-2.1456759956</p> <p>H,O,3.1748016215,0.7611550523,-1.2088948514</p> <p>H,O,3.3679082733,0.010023786,1.155123991</p> <p>H,O,1.3400464006,-0.2489027428,2.5475019032</p> <p>H,O,-4.8173803736,-1.0056548563,3.7333388439</p> <p>H,O,-4.5843010713,-2.6689468543,1.8409017375</p> <p>H,O,-7.2098496719,-2.2671852876,-0.8274005844</p> <p>H,O,-6.0020248155,-3.4606567167,-0.1141886885</p> <p>H,O,-4.6833265338,-0.6943594395,-5.4393109233</p> <p>H,O,-3.0465363822,-0.0900570365,-5.0686184607</p> <p>H,O,-3.321576662,-1.8344962259,-5.2872312107</p> <p>H,O,-0.0312018467,-2.6541415711,-1.0625475653</p> <p>H,O,-1.5457527259,-1.7239095533,-0.9061139754</p> <p>H,O,-1.5503730053,-3.3174897693,-1.711978609</p> |
|                       | <p>PdACN2_SMD.log</p> <p>Low frequencies --- -14.0837 -10.7448 -0.0006 -0.0005 -0.0004 5.0889</p> <p>Low frequencies --- 27.4990 33.9371 44.9628</p> <p>Zero-point correction= 0.093026 (Hartree/Particle)</p> <p>Thermal correction to Energy= 0.103362</p> <p>Thermal correction to Enthalpy= 0.104306</p> <p>Thermal correction to Gibbs Free Energy= 0.054746</p> <p>Sum of electronic and zero-point Energies= -393.500234</p> <p>Sum of electronic and thermal Energies= -393.489899</p> <p>Sum of electronic and thermal Enthalpies= -393.488955</p> <p>Sum of electronic and thermal Free Energies= -393.538515</p> <p>C,O,0.001151779,0.0182632039,-0.0069529928</p> <p>C,O,0.0012981197,-0.003610919,1.4399371599</p> <p>N,O,0.0008491426,-0.0205103637,2.5935579704</p> <p>Pd,O,-0.0016958075,-0.0473241719,4.5858941101</p> <p>N,O,-0.004223696,-0.0736435122,6.5782315834</p> <p>C,O,-0.005760306,-0.0884644627,7.731880601</p> <p>H,O,-1.0266868297,0.0235421891,-0.3767608635</p> <p>H,O,0.5148268075,0.914054019,-0.3632957835</p> <p>H,O,0.5154185452,-0.8658854585,-0.3904350468</p> <p>C,O,-0.006796568,-0.1077396137,9.178783048</p>                                                                                                                                                                                                                                                                                                                                                                                                                                                                                                                                                                                                                                                                                                                                                                                                                                                                                                                                                                                                                                                                                                                                                                                                                                                                                                                                                                                                                                                                                                                                                                                                                                                                                                                                                                                                                  |

|  |                                                                                                                                            |
|--|--------------------------------------------------------------------------------------------------------------------------------------------|
|  | H,0,1.0175163668,-0.1937016771,9.5485262832<br>H,0,-0.4492776346,0.8150481794,9.5607990852<br>H,0,-0.5895824103,-0.9593677922,9.5370354205 |
|--|--------------------------------------------------------------------------------------------------------------------------------------------|
